# Supplementary material for: A compendium of ruminant gastrointestinal phage genomes revealed a higher proportion of lytic phages than in any other environments
Source: Microbiome. 2024 Apr 4;12:69. doi: 10.1186/s40168-024-01784-2 (PMC10993611; doi:10.1186/s40168-024-01784-2)
Supplement: Supplementary file 2 — Additional file 1: Table S1. Detailed sampling information for 2333 samples. Table S2. Number of ruminant gastrointestinal tract samples. Table S3. Detailed information for public viral reference databases used in this study. Table S4. Statistics of assembly results of 2333 samples. Table S5. Statistical information and classification level annotation of 64,922 phages. Table S6. Comparison of methods between URPC and RVD. Table S7. Classification level annotation of 41,738 viral genomes of RVD. Table S8. An overview of URPC phages and their bacterial/archaeal host prediction. [file 40168_2024_1784_MOESM1_ESM.xlsx]

## Sheet: Table S1
Detailed sampling information for 2333 samples
Sample name	Bioproject accession	animal host	Isolation source	Clean data reads	Clean data total bases
ABCN1	PRJNA656389	Buffalo	Rectum	23265796	6953735183
ABCN10	PRJNA656389	Buffalo	Rectum	17838933	5329032993
ABCN11	PRJNA656389	Buffalo	Rectum	20714878	6192952847
ABCN12	PRJNA656389	Buffalo	Rectum	25134354	7507738739
ABCN13	PRJNA656389	Buffalo	Rectum	23724696	7090668820
ABCN14	PRJNA656389	Buffalo	Rectum	24582012	7349747762
ABCN15	PRJNA656389	Buffalo	Rectum	24821233	7415649595
ABCN16	PRJNA656389	Buffalo	Rectum	25885625	7737012300
ABCN17	PRJNA656389	Buffalo	Rectum	22214416	6638068594
ABCN18	PRJNA656389	Buffalo	Rectum	27899402	8341666567
ABCN19	PRJNA656389	Buffalo	Rectum	24258131	7253159207
ABCN2	PRJNA656389	Buffalo	Rectum	20434312	6106034290
ABCN20	PRJNA656389	Buffalo	Rectum	28133838	8409483918
ABCN21	PRJNA656389	Buffalo	Rectum	26804858	8011086570
ABCN22	PRJNA656389	Buffalo	Rectum	23080812	6895726212
ABCN23	PRJNA656389	Buffalo	Rectum	24336760	7267684111
ABCN24	PRJNA656389	Buffalo	Rectum	23199353	6934278395
ABCN25	PRJNA656389	Buffalo	Rectum	26520034	7925286461
ABCN26	PRJNA656389	Buffalo	Rectum	19801624	5915853900
ABCN27	PRJNA656389	Buffalo	Rectum	24129597	7208591895
ABCN28	PRJNA656389	Buffalo	Rectum	22471636	6717321384
ABCN29	PRJNA656389	Buffalo	Rectum	23927886	7147108691
ABCN3	PRJNA656389	Buffalo	Rectum	25607953	7653542816
ABCN30	PRJNA656389	Buffalo	Rectum	25244630	7541659485
ABCN31	PRJNA656389	Buffalo	Rectum	17456259	5217111523
ABCN32	PRJNA656389	Buffalo	Rectum	24729734	7390984616
ABCN33	PRJNA656389	Buffalo	Rectum	23008044	6872569051
ABCN4	PRJNA656389	Buffalo	Rectum	25962079	7753682091
ABCN5	PRJNA656389	Buffalo	Rectum	21096712	6300833236
ABCN6	PRJNA656389	Buffalo	Rectum	27461096	8208365094
ABCN7	PRJNA656389	Buffalo	Rectum	18139575	5421522675
ABCN8	PRJNA656389	Buffalo	Rectum	21535474	6436354951
ABCN9	PRJNA656389	Buffalo	Rectum	19300850	5768168987
ABDN1	PRJNA656389	Buffalo	Rectum	6979726	2084511888
ABGD10	PRJNA656389	Buffalo	Rectum	24551582	7337273653
ABGD11	PRJNA656389	Buffalo	Rectum	25760125	7702231286
ABGD2	PRJNA656389	Buffalo	Rectum	26306877	7858717590
ABGD3	PRJNA656389	Buffalo	Rectum	30739263	9184439432
ABGD4	PRJNA656389	Buffalo	Rectum	27025230	8076919390
ABGD5	PRJNA656389	Buffalo	Rectum	22420072	6699823351
ABGD6	PRJNA656389	Buffalo	Rectum	19972321	5966410783
ABGD7	PRJNA656389	Buffalo	Rectum	22572228	6745773146
ABGD8	PRJNA656389	Buffalo	Rectum	22263798	6652654512
ABGD9	PRJNA656389	Buffalo	Rectum	19638807	5866709651
BLJ1	PRJNA656389	Buffalo	Rectum	26833001	8022077489
BLJ10	PRJNA656389	Buffalo	Rectum	25739888	7694657684
BLJ11	PRJNA656389	Buffalo	Rectum	25998760	7773467449
BLJ12	PRJNA656389	Buffalo	Rectum	25679036	7675393417
BLJ13	PRJNA656389	Buffalo	Rectum	26122277	7809358318
BLJ14	PRJNA656389	Buffalo	Rectum	29171756	8720940408
BLJ15	PRJNA656389	Buffalo	Rectum	26383856	7886698282
BLJ16	PRJNA656389	Buffalo	Rectum	25784541	7706585538
BLJ17	PRJNA656389	Buffalo	Rectum	27141939	8112442335
BLJ18	PRJNA656389	Buffalo	Rectum	27835977	8321306663
BLJ19	PRJNA656389	Buffalo	Rectum	28564457	8537518669
BLJ20	PRJNA656389	Buffalo	Rectum	19581572	5853890486
BLJ21	PRJNA656389	Buffalo	Rectum	23542633	7037687770
BLJ22	PRJNA656389	Buffalo	Rectum	25628382	7660945827
BLJ23	PRJNA656389	Buffalo	Rectum	27594490	8248010812
BLJ24	PRJNA656389	Buffalo	Rectum	28981612	8665734377
BLJ25	PRJNA656389	Buffalo	Rectum	26310978	7865920333
BLJ26	PRJNA656389	Buffalo	Rectum	22461100	6715197829
BLJ27	PRJNA656389	Buffalo	Rectum	26085830	7797414427
BLJ28	PRJNA656389	Buffalo	Rectum	20933209	6257665639
BLJ29	PRJNA656389	Buffalo	Rectum	24147834	7220579593
BLJ30	PRJNA656389	Buffalo	Rectum	24043143	7187411169
BLJ31	PRJNA656389	Buffalo	Rectum	24828437	7422689863
BLJ32	PRJNA656389	Buffalo	Rectum	24856959	7432006772
BLJ33	PRJNA656389	Buffalo	Rectum	29215942	8734403251
BLJ35	PRJNA656389	Buffalo	Rectum	24927524	7453069519
BLJ5	PRJNA656389	Buffalo	Rectum	22652387	6770420786
BLJ6	PRJNA656389	Buffalo	Rectum	23874458	7138397951
BLJ7	PRJNA656389	Buffalo	Rectum	28110912	8405711079
BLJ8	PRJNA656389	Buffalo	Rectum	30039956	8980117218
BLJ9	PRJNA656389	Buffalo	Rectum	25614615	7658353345
FGD1_S1_L003	PRJNA656389	Buffalo	Rectum	22597960	6800555480
FGD10_S137_L002	PRJNA656389	Buffalo	Rectum	24228585	7296463076
FGD11_S138_L002	PRJNA656389	Buffalo	Rectum	23755523	7153072873
FGD12_S139_L002	PRJNA656389	Buffalo	Rectum	25055886	7547769255
FGD13_S140_L002	PRJNA656389	Buffalo	Rectum	26562273	8000251149
FGD14_S141_L002	PRJNA656389	Buffalo	Rectum	24109300	7258484990
FGD2_S2_L003	PRJNA656389	Buffalo	Rectum	23371931	7033023530
FGD3_S3_L003	PRJNA656389	Buffalo	Rectum	20908764	6286404248
FGD4_S4_L003	PRJNA656389	Buffalo	Rectum	23180850	6975710470
FGD5_S5_L003	PRJNA656389	Buffalo	Rectum	22225453	6686558146
FGD6_S6_L003	PRJNA656389	Buffalo	Rectum	22535110	6778765751
FGD7_S7_L003	PRJNA656389	Buffalo	Rectum	23610180	7104876268
FGD8_S8_L003	PRJNA656389	Buffalo	Rectum	21858318	6579216277
FGD9_S9_L003	PRJNA656389	Buffalo	Rectum	22596577	6795516593
GBCM1_S175_L002	PRJNA656389	Buffalo	Rectum	25412864	7654501305
GBCM10_S177_L002	PRJNA656389	Buffalo	Rectum	22946958	6910686921
GBCM11_S172_L002	PRJNA656389	Buffalo	Rectum	23690537	7135720418
GBCM2_S178_L002	PRJNA656389	Buffalo	Rectum	24483251	7373207370
GBCM3_S170_L002	PRJNA656389	Buffalo	Rectum	25716892	7744541109
GBCM4_S168_L002	PRJNA656389	Buffalo	Rectum	24183844	7281069857
GBCM5_S173_L002	PRJNA656389	Buffalo	Rectum	25353557	7634189645
GBCM6_S174_L002	PRJNA656389	Buffalo	Rectum	23216566	6992128215
GBCM7_S176_L002	PRJNA656389	Buffalo	Rectum	25557791	7698257068
GBCM8_S171_L002	PRJNA656389	Buffalo	Rectum	22928666	6903024685
GBCM9_S169_L002	PRJNA656389	Buffalo	Rectum	23869268	7188588701
GBS1_S179_L002	PRJNA656389	Buffalo	Rectum	25279062	7608965665
GBS2_S180_L002	PRJNA656389	Buffalo	Rectum	27390076	8248477775
GBS3_S181_L002	PRJNA656389	Buffalo	Rectum	21000637	6314109629
GBS4_S182_L002	PRJNA656389	Buffalo	Rectum	25664439	7727739781
GFB1	PRJNA656389	Buffalo	Omasum	18903157	5657753115
GFL1	PRJNA656389	Buffalo	Rumen	23894479	7146743394
GFW1	PRJNA656389	Buffalo	Reticulum	23496031	7031356216
HCN1	PRJNA656389	Buffalo	Rectum	27392932	8193565062
HCN10	PRJNA656389	Buffalo	Rectum	25684427	7683847265
HCN11	PRJNA656389	Buffalo	Rectum	25916670	7751639914
HCN12	PRJNA656389	Buffalo	Rectum	21326172	6380813112
HCN13	PRJNA656389	Buffalo	Rectum	24212628	7241093022
HCN14	PRJNA656389	Buffalo	Rectum	27060632	8092627720
HCN15	PRJNA656389	Buffalo	Rectum	26180214	7822593057
HCN17	PRJNA656389	Buffalo	Rectum	23275266	6955386697
HCN18	PRJNA656389	Buffalo	Rectum	24441629	7309828590
HCN19	PRJNA656389	Buffalo	Rectum	22516339	6736118120
HCN2	PRJNA656389	Buffalo	Rectum	26919519	8051988181
HCN20	PRJNA656389	Buffalo	Rectum	29208623	8739075647
HCN21	PRJNA656389	Buffalo	Rectum	20433969	6113444251
HCN22	PRJNA656389	Buffalo	Rectum	24826869	7422957214
HCN23	PRJNA656389	Buffalo	Rectum	20685521	6190500231
HCN24	PRJNA656389	Buffalo	Rectum	24516896	7335948805
HCN25	PRJNA656389	Buffalo	Rectum	20358089	6091292344
HCN26	PRJNA656389	Buffalo	Rectum	20357609	6085869359
HCN27	PRJNA656389	Buffalo	Rectum	29905413	8945024122
HCN28	PRJNA656389	Buffalo	Rectum	26776046	8008249613
HCN29	PRJNA656389	Buffalo	Rectum	30040256	8983316906
HCN3	PRJNA656389	Buffalo	Rectum	32756642	9799493892
HCN30	PRJNA656389	Buffalo	Rectum	23695367	7089980851
HCN31	PRJNA656389	Buffalo	Rectum	27869519	8333689177
HCN4	PRJNA656389	Buffalo	Rectum	24658609	7376432592
HCN5	PRJNA656389	Buffalo	Rectum	30212838	9037375644
HCN6	PRJNA656389	Buffalo	Rectum	30582791	9148725158
HCN7	PRJNA656389	Buffalo	Rectum	29365413	8783475485
HCN8	PRJNA656389	Buffalo	Rectum	22239873	6645508129
HCN9	PRJNA656389	Buffalo	Rectum	30777766	9207151625
HDN1	PRJNA656389	Buffalo	Rectum	25757767	7705382859
HDN10	PRJNA656389	Buffalo	Rectum	22638844	6772740314
HDN2	PRJNA656389	Buffalo	Rectum	31554832	9437140240
HDN3	PRJNA656389	Buffalo	Rectum	31042306	9284159988
HDN4	PRJNA656389	Buffalo	Rectum	32389828	9677261604
HDN5	PRJNA656389	Buffalo	Rectum	26198764	7836862911
HDN6	PRJNA656389	Buffalo	Rectum	21277982	6363885326
HDN7	PRJNA656389	Buffalo	Rectum	22313294	6648888716
HDN8	PRJNA656389	Buffalo	Rectum	31469039	9414765856
HDN9	PRJNA656389	Buffalo	Rectum	26920641	8052184814
KCN10	PRJNA656389	Buffalo	Rectum	19468256	5817839798
KCN11	PRJNA656389	Buffalo	Rectum	32262727	9656888552
KCN12	PRJNA656389	Buffalo	Rectum	17050376	5094791729
KCN13	PRJNA656389	Buffalo	Rectum	16645651	4973368933
KCN14	PRJNA656389	Buffalo	Rectum	15283815	4555856588
KCN15	PRJNA656389	Buffalo	Rectum	20039796	5989607668
KCN16	PRJNA656389	Buffalo	Rectum	18659168	5575842147
KCN17	PRJNA656389	Buffalo	Rectum	20708692	6188789440
KCN18	PRJNA656389	Buffalo	Rectum	23322093	6969165719
KCN19	PRJNA656389	Buffalo	Rectum	22916609	6853207839
KCN2	PRJNA656389	Buffalo	Rectum	18996480	5675849830
KCN20	PRJNA656389	Buffalo	Rectum	21233024	6345171527
KCN21	PRJNA656389	Buffalo	Rectum	22522440	6729352632
KCN22	PRJNA656389	Buffalo	Rectum	23628494	7062248165
KCN23	PRJNA656389	Buffalo	Rectum	25745142	7689032688
KCN25	PRJNA656389	Buffalo	Rectum	32424997	9704520765
KCN26	PRJNA656389	Buffalo	Rectum	24756781	7398344183
KCN27	PRJNA656389	Buffalo	Rectum	16686664	4981160915
KCN29	PRJNA656389	Buffalo	Rectum	26987420	8076752566
KCN3	PRJNA656389	Buffalo	Rectum	18995756	5675944792
KCN30	PRJNA656389	Buffalo	Rectum	18756150	5603516754
KCN31	PRJNA656389	Buffalo	Rectum	24310967	7270196201
KCN32	PRJNA656389	Buffalo	Rectum	21018983	6280395986
KCN33	PRJNA656389	Buffalo	Rectum	24527616	7339506158
KCN35	PRJNA656389	Buffalo	Rectum	18131209	5417643242
KCN4	PRJNA656389	Buffalo	Rectum	17254623	5156383953
KCN5	PRJNA656389	Buffalo	Rectum	20209325	6038784812
KCN6	PRJNA656389	Buffalo	Rectum	29583716	8855908937
KCN7	PRJNA656389	Buffalo	Rectum	22296446	6663265321
KCN8	PRJNA656389	Buffalo	Rectum	17689276	5285922719
KCN9	PRJNA656389	Buffalo	Rectum	17308208	5170424860
LCN1	PRJNA656389	Buffalo	Rectum	96855258	4333912313
LCN10	PRJNA656389	Buffalo	Rectum	23681997	7078069916
LCN11	PRJNA656389	Buffalo	Rectum	20963583	6259466470
LCN12	PRJNA656389	Buffalo	Rectum	19238711	5738268105
LCN13	PRJNA656389	Buffalo	Rectum	19067133	5697538316
LCN14	PRJNA656389	Buffalo	Rectum	18741566	5599607563
LCN15	PRJNA656389	Buffalo	Rectum	20491068	6097213599
LCN16	PRJNA656389	Buffalo	Rectum	102882314	4855384152
LCN17	PRJNA656389	Buffalo	Rectum	27257331	8128445527
LCN18	PRJNA656389	Buffalo	Rectum	21811276	6512440528
LCN19	PRJNA656389	Buffalo	Rectum	19102915	5703591481
LCN2	PRJNA656389	Buffalo	Rectum	20679557	6176423691
LCN20	PRJNA656389	Buffalo	Rectum	21158588	6309311771
LCN21	PRJNA656389	Buffalo	Rectum	26107507	7794274285
LCN22	PRJNA656389	Buffalo	Rectum	23284944	6944749919
LCN23	PRJNA656389	Buffalo	Rectum	98392194	4399440798
LCN24	PRJNA656389	Buffalo	Rectum	20757245	6198342196
LCN25	PRJNA656389	Buffalo	Rectum	28126038	8402847050
LCN3	PRJNA656389	Buffalo	Rectum	84769172	3598675167
LCN4	PRJNA656389	Buffalo	Rectum	76174688	3414791741
LCN5	PRJNA656389	Buffalo	Rectum	23309137	6964265437
LCN6	PRJNA656389	Buffalo	Rectum	18854377	5628591091
LCN7	PRJNA656389	Buffalo	Rectum	23177947	6924518515
LCN8	PRJNA656389	Buffalo	Rectum	22586191	6743658359
LCN9	PRJNA656389	Buffalo	Rectum	31079860	9273130176
M1	PRJNA656389	Buffalo	Rectum	7905887	2363038531
M10	PRJNA656389	Buffalo	Rectum	17838893	5333407057
M11	PRJNA656389	Buffalo	Rectum	19038257	5694837468
M12	PRJNA656389	Buffalo	Rectum	29037655	8685928334
M14	PRJNA656389	Buffalo	Rectum	24907310	7449470850
M15	PRJNA656389	Buffalo	Rectum	23239075	6952508880
M16	PRJNA656389	Buffalo	Rectum	15483385	4626387344
M18	PRJNA656389	Buffalo	Rectum	21755828	6505620860
M2	PRJNA656389	Buffalo	Rectum	25486720	7624137025
M3	PRJNA656389	Buffalo	Rectum	25228757	7543796984
M5	PRJNA656389	Buffalo	Rectum	16753017	5007067548
M6	PRJNA656389	Buffalo	Rectum	29058134	8682965108
M7	PRJNA656389	Buffalo	Rectum	20245928	6051533670
M8	PRJNA656389	Buffalo	Rectum	26773326	8007584398
M9	PRJNA656389	Buffalo	Rectum	26026684	7784035377
MCN10	PRJNA656389	Buffalo	Rectum	27145879	8103954187
MCN11	PRJNA656389	Buffalo	Rectum	16284810	4864955863
MCN12	PRJNA656389	Buffalo	Rectum	23121652	6903074273
MCN13	PRJNA656389	Buffalo	Rectum	23973538	7153305721
MCN14	PRJNA656389	Buffalo	Rectum	22670063	6775776197
MCN15	PRJNA656389	Buffalo	Rectum	21456231	6412680345
MCN16	PRJNA656389	Buffalo	Rectum	30751380	9189878136
MCN17	PRJNA656389	Buffalo	Rectum	24006775	7174771899
MCN18	PRJNA656389	Buffalo	Rectum	24368903	7283464552
MCN19	PRJNA656389	Buffalo	Rectum	25659110	7670971079
MCN2	PRJNA656389	Buffalo	Rectum	17172741	5126437688
MCN20	PRJNA656389	Buffalo	Rectum	24678496	7376435661
MCN21	PRJNA656389	Buffalo	Rectum	26166232	7821479534
MCN22	PRJNA656389	Buffalo	Rectum	29866946	8926705309
MCN23	PRJNA656389	Buffalo	Rectum	25373962	7584668174
MCN24	PRJNA656389	Buffalo	Rectum	25086162	7498447335
MCN26	PRJNA656389	Buffalo	Rectum	24632660	7364506891
MCN27	PRJNA656389	Buffalo	Rectum	25853356	7729173264
MCN28	PRJNA656389	Buffalo	Rectum	26077942	7796054258
MCN29	PRJNA656389	Buffalo	Rectum	26013721	7777286301
MCN3	PRJNA656389	Buffalo	Rectum	20630480	6172076379
MCN30	PRJNA656389	Buffalo	Rectum	28102351	8399784968
MCN31	PRJNA656389	Buffalo	Rectum	24925481	7449880256
MCN32	PRJNA656389	Buffalo	Rectum	24915712	7448094772
MCN33	PRJNA656389	Buffalo	Rectum	26787774	8009170122
MCN35	PRJNA656389	Buffalo	Rectum	22765289	6807278672
MCN4	PRJNA656389	Buffalo	Rectum	15772398	4709170053
MCN5	PRJNA656389	Buffalo	Rectum	28474134	8508549712
MCN6	PRJNA656389	Buffalo	Rectum	21204639	6327063276
MCN7	PRJNA656389	Buffalo	Rectum	17819651	5317520091
MCN8	PRJNA656389	Buffalo	Rectum	16836392	5027591750
MGD1_S142_L002	PRJNA656389	Buffalo	Rectum	25628039	7718646246
MGD10_S151_L002	PRJNA656389	Buffalo	Rectum	26041858	7843693455
MGD11_S152_L002	PRJNA656389	Buffalo	Rectum	23776029	7159778048
MGD12_S153_L002	PRJNA656389	Buffalo	Rectum	24062302	7247265045
MGD2_S143_L002	PRJNA656389	Buffalo	Rectum	23934970	7209022061
MGD3_S144_L002	PRJNA656389	Buffalo	Rectum	25135287	7571839779
MGD4_S145_L002	PRJNA656389	Buffalo	Rectum	24125344	7267354246
MGD5_S146_L002	PRJNA656389	Buffalo	Rectum	23863684	7187776885
MGD6_S147_L002	PRJNA656389	Buffalo	Rectum	21813676	6569408440
MGD7_S148_L002	PRJNA656389	Buffalo	Rectum	24850437	7482409747
MGD8_S149_L002	PRJNA656389	Buffalo	Rectum	24735539	7450034425
MGD9_S150_L002	PRJNA656389	Buffalo	Rectum	23625497	7116251633
NB1	PRJNA656389	Buffalo	Omasum	42394343	12650804066
NB10	PRJNA656389	Buffalo	Omasum	21823688	6521966535
NB13	PRJNA656389	Buffalo	Omasum	19366612	5789571420
NB14	PRJNA656389	Buffalo	Omasum	16770330	5011668995
NB15	PRJNA656389	Buffalo	Omasum	20124105	6017204352
NB16	PRJNA656389	Buffalo	Omasum	23711782	7083708438
NB17	PRJNA656389	Buffalo	Omasum	23281315	6956416407
NB18	PRJNA656389	Buffalo	Omasum	21880890	6538008601
NB19	PRJNA656389	Buffalo	Omasum	20683420	6178970949
NB2	PRJNA656389	Buffalo	Omasum	23249693	6947124276
NB21	PRJNA656389	Buffalo	Omasum	23708571	7083397565
NB22	PRJNA656389	Buffalo	Omasum	26913036	8038099364
NB24	PRJNA656389	Buffalo	Omasum	15140954	4525992303
NB25	PRJNA656389	Buffalo	Omasum	24540794	7329997895
NB26	PRJNA656389	Buffalo	Omasum	20089576	5994272523
NB27	PRJNA656389	Buffalo	Omasum	23841862	7121552770
NB28	PRJNA656389	Buffalo	Omasum	20009726	5976732451
NB29	PRJNA656389	Buffalo	Omasum	25288563	7552345186
NB3	PRJNA656389	Buffalo	Omasum	21440923	6406765413
NB30	PRJNA656389	Buffalo	Omasum	24281091	7253618671
NB31	PRJNA656389	Buffalo	Omasum	20924497	6247508584
NB32	PRJNA656389	Buffalo	Omasum	21591352	6454540462
NB33	PRJNA656389	Buffalo	Omasum	18976275	5669053264
NB34	PRJNA656389	Buffalo	Omasum	23951972	7153000918
NB35	PRJNA656389	Buffalo	Omasum	24058284	7194017344
NB4	PRJNA656389	Buffalo	Omasum	23985568	7168098279
NB5	PRJNA656389	Buffalo	Omasum	28727153	8575274587
NB6	PRJNA656389	Buffalo	Omasum	26301936	7858326951
NB7	PRJNA656389	Buffalo	Omasum	17882375	5341247835
NB8	PRJNA656389	Buffalo	Omasum	18391527	5486840447
NB9	PRJNA656389	Buffalo	Omasum	17987508	5378211883
NJ1	PRJNA656389	Buffalo	Colon	5181521	1546243563
NJ11	PRJNA656389	Buffalo	Colon	14132393	4221344057
NJ12	PRJNA656389	Buffalo	Colon	13504466	4032375080
NJ13	PRJNA656389	Buffalo	Colon	15203314	4536529302
NJ14	PRJNA656389	Buffalo	Colon	5950118	1771283482
NJ15	PRJNA656389	Buffalo	Colon	17402007	5201370724
NJ16	PRJNA656389	Buffalo	Colon	4172606	1245580611
NJ17	PRJNA656389	Buffalo	Colon	13885701	4147014751
NJ18	PRJNA656389	Buffalo	Colon	14283018	4266130536
NJ19	PRJNA656389	Buffalo	Colon	7778627	2322256722
NJ2	PRJNA656389	Buffalo	Colon	29480587	8809050366
NJ21	PRJNA656389	Buffalo	Colon	11284202	3369895425
NJ22	PRJNA656389	Buffalo	Colon	20329449	6073290887
NJ24	PRJNA656389	Buffalo	Colon	11737508	3507412244
NJ25	PRJNA656389	Buffalo	Colon	20126387	6010854067
NJ26	PRJNA656389	Buffalo	Colon	2197656	655098237
NJ27	PRJNA656389	Buffalo	Colon	3022364	901163162
NJ28	PRJNA656389	Buffalo	Colon	3617696	1079536539
NJ29	PRJNA656389	Buffalo	Colon	10807396	3225691418
NJ30	PRJNA656389	Buffalo	Colon	10292648	3073962924
NJ31	PRJNA656389	Buffalo	Colon	23758911	7103469932
NJ32	PRJNA656389	Buffalo	Colon	16973655	5069623830
NJ33	PRJNA656389	Buffalo	Colon	13552618	4044683579
NJ34	PRJNA656389	Buffalo	Colon	2700145	804717922
NJ35	PRJNA656389	Buffalo	Colon	3625135	1081923254
NJ4	PRJNA656389	Buffalo	Colon	3282655	979531502
NJ5	PRJNA656389	Buffalo	Colon	3714367	1103733702
NJ6	PRJNA656389	Buffalo	Colon	5643737	1685745362
NJ7	PRJNA656389	Buffalo	Colon	16422727	4899170648
NJ9	PRJNA656389	Buffalo	Colon	12461745	3724110638
NK1	PRJNA656389	Buffalo	Jejunum	1284507	381230772
NK10	PRJNA656389	Buffalo	Jejunum	13851350	4135160887
NK11	PRJNA656389	Buffalo	Jejunum	2733742	809105824
NK12	PRJNA656389	Buffalo	Jejunum	1172436	343612293
NK13	PRJNA656389	Buffalo	Jejunum	1946740	577740451
NK15	PRJNA656389	Buffalo	Jejunum	2085526	620970821
NK17	PRJNA656389	Buffalo	Jejunum	734074	217600708
NK18	PRJNA656389	Buffalo	Jejunum	1844521	549791994
NK2	PRJNA656389	Buffalo	Jejunum	558335	165010982
NK21	PRJNA656389	Buffalo	Jejunum	1279469	379674712
NK22	PRJNA656389	Buffalo	Jejunum	890413	264328494
NK26	PRJNA656389	Buffalo	Jejunum	675124	200212837
NK29	PRJNA656389	Buffalo	Jejunum	3039367	147895296
NK3	PRJNA656389	Buffalo	Jejunum	781429	231586193
NK30	PRJNA656389	Buffalo	Jejunum	654527	193890779
NK32	PRJNA656389	Buffalo	Jejunum	5442635	1622191037
NK33	PRJNA656389	Buffalo	Jejunum	3552725	183124245
NK34	PRJNA656389	Buffalo	Jejunum	1010054	299715707
NK35	PRJNA656389	Buffalo	Jejunum	990681	293896482
NK4	PRJNA656389	Buffalo	Jejunum	1416284	421259109
NK5	PRJNA656389	Buffalo	Jejunum	6306674	1862610891
NK6	PRJNA656389	Buffalo	Jejunum	4411699	1317028939
NK7	PRJNA656389	Buffalo	Jejunum	758991	222631289
NK9	PRJNA656389	Buffalo	Jejunum	942181	278048194
NL1	PRJNA656389	Buffalo	Rumen	129331616	38594036959
NL10	PRJNA656389	Buffalo	Rumen	21162176	6328075208
NL12	PRJNA656389	Buffalo	Rumen	25805844	7711063688
NL13	PRJNA656389	Buffalo	Rumen	28605611	8554633177
NL14	PRJNA656389	Buffalo	Rumen	22390260	6688621303
NL15	PRJNA656389	Buffalo	Rumen	23341881	6980379345
NL16	PRJNA656389	Buffalo	Rumen	23758280	7106188722
NL17	PRJNA656389	Buffalo	Rumen	21389236	6392759698
NL18	PRJNA656389	Buffalo	Rumen	19644316	5865266702
NL19	PRJNA656389	Buffalo	Rumen	24535717	7333090477
NL2	PRJNA656389	Buffalo	Rumen	108940844	5320284933
NL21	PRJNA656389	Buffalo	Rumen	25996305	7766653256
NL22	PRJNA656389	Buffalo	Rumen	25177986	7527753179
NL24	PRJNA656389	Buffalo	Rumen	22945940	6852855420
NL25	PRJNA656389	Buffalo	Rumen	25055497	7485279784
NL26	PRJNA656389	Buffalo	Rumen	25168024	7518359468
NL27	PRJNA656389	Buffalo	Rumen	23900717	7137587713
NL28	PRJNA656389	Buffalo	Rumen	22912622	6847357910
NL29	PRJNA656389	Buffalo	Rumen	95101401	4098587966
NL3	PRJNA656389	Buffalo	Rumen	26848811	8021683867
NL31	PRJNA656389	Buffalo	Rumen	22890677	6846278915
NL32	PRJNA656389	Buffalo	Rumen	24765084	7399683844
NL33	PRJNA656389	Buffalo	Rumen	23124190	6911277803
NL34	PRJNA656389	Buffalo	Rumen	16880221	5041111364
NL35	PRJNA656389	Buffalo	Rumen	25742081	7696677535
NL4	PRJNA656389	Buffalo	Rumen	22977818	6867731871
NL5	PRJNA656389	Buffalo	Rumen	25180940	7526857869
NL7	PRJNA656389	Buffalo	Rumen	22699533	6783450342
NL8	PRJNA656389	Buffalo	Rumen	16521610	4928739234
NL9	PRJNA656389	Buffalo	Rumen	16771687	5007634115
NM1	PRJNA656389	Buffalo	Cecum	5301854	1578850145
NM10	PRJNA656389	Buffalo	Cecum	9796538	2925834306
NM12	PRJNA656389	Buffalo	Cecum	5263522	1570131141
NM14	PRJNA656389	Buffalo	Cecum	2470919	736883946
NM15	PRJNA656389	Buffalo	Cecum	28933553	8655830627
NM16	PRJNA656389	Buffalo	Cecum	2663003	794841688
NM17	PRJNA656389	Buffalo	Cecum	18952445	5663599104
NM18	PRJNA656389	Buffalo	Cecum	16124305	4814480040
NM19	PRJNA656389	Buffalo	Cecum	10932819	3263628049
NM2	PRJNA656389	Buffalo	Cecum	18582800	5552560366
NM21	PRJNA656389	Buffalo	Cecum	9837065	2937098972
NM22	PRJNA656389	Buffalo	Cecum	17128813	5117542534
NM24	PRJNA656389	Buffalo	Cecum	17705667	5289801792
NM25	PRJNA656389	Buffalo	Cecum	17921999	5354468466
NM26	PRJNA656389	Buffalo	Cecum	8696652	2596768483
NM27	PRJNA656389	Buffalo	Cecum	16613093	4958459735
NM28	PRJNA656389	Buffalo	Cecum	17946356	5362317563
NM29	PRJNA656389	Buffalo	Cecum	15603660	4661447776
NM3	PRJNA656389	Buffalo	Cecum	21854516	6530740988
NM30	PRJNA656389	Buffalo	Cecum	4529219	1348466529
NM31	PRJNA656389	Buffalo	Cecum	25308372	7567099507
NM32	PRJNA656389	Buffalo	Cecum	103447149	4817604053
NM33	PRJNA656389	Buffalo	Cecum	10295241	3072885192
NM34	PRJNA656389	Buffalo	Cecum	4120172	1230452927
NM35	PRJNA656389	Buffalo	Cecum	5312704	1586020711
NM4	PRJNA656389	Buffalo	Cecum	22764082	6803172070
NM5	PRJNA656389	Buffalo	Cecum	15712542	4694963017
NM6	PRJNA656389	Buffalo	Cecum	20787846	6211788173
NM7	PRJNA656389	Buffalo	Cecum	18164901	5410611858
NM8	PRJNA656389	Buffalo	Cecum	17223965	5145408893
NM9	PRJNA656389	Buffalo	Cecum	4915767	1467494750
NW10	PRJNA656389	Buffalo	Reticulum	26277249	7852586911
NW12	PRJNA656389	Buffalo	Reticulum	25027275	7476880821
NW13	PRJNA656389	Buffalo	Reticulum	24230176	7244332299
NW15	PRJNA656389	Buffalo	Reticulum	25602695	7644362474
NW16	PRJNA656389	Buffalo	Reticulum	27337402	8167327439
NW18	PRJNA656389	Buffalo	Reticulum	12674450	3786385458
NW19	PRJNA656389	Buffalo	Reticulum	21418156	6399135056
NW2	PRJNA656389	Buffalo	Reticulum	135026388	6299266706
NW21	PRJNA656389	Buffalo	Reticulum	25463968	7605369606
NW24	PRJNA656389	Buffalo	Reticulum	23079785	6894459031
NW25	PRJNA656389	Buffalo	Reticulum	21985065	6567327003
NW26	PRJNA656389	Buffalo	Reticulum	22953637	6860305056
NW27	PRJNA656389	Buffalo	Reticulum	23019473	6877251207
NW28	PRJNA656389	Buffalo	Reticulum	20082948	5999741135
NW29	PRJNA656389	Buffalo	Reticulum	25322001	7563963039
NW3	PRJNA656389	Buffalo	Reticulum	24821450	7419448003
NW30	PRJNA656389	Buffalo	Reticulum	16242820	4848132749
NW31	PRJNA656389	Buffalo	Reticulum	21992131	6568898072
NW32	PRJNA656389	Buffalo	Reticulum	22788500	6808522664
NW33	PRJNA656389	Buffalo	Reticulum	23311277	6965713538
NW34	PRJNA656389	Buffalo	Reticulum	43513173	12991098654
NW35	PRJNA656389	Buffalo	Reticulum	25524983	7630940409
NW4	PRJNA656389	Buffalo	Reticulum	21511267	6428579948
NW5	PRJNA656389	Buffalo	Reticulum	19998371	5978447399
NW6	PRJNA656389	Buffalo	Reticulum	24444261	7311487682
NW7	PRJNA656389	Buffalo	Reticulum	21950209	6558325164
NW8	PRJNA656389	Buffalo	Reticulum	1105220	328048930
NZ1	PRJNA656389	Buffalo	Abomasum	16493671	4927849780
NZ10	PRJNA656389	Buffalo	Abomasum	17748238	5305176031
NZ11	PRJNA656389	Buffalo	Abomasum	17717149	5294905304
NZ15	PRJNA656389	Buffalo	Abomasum	25198894	7536894756
NZ16	PRJNA656389	Buffalo	Abomasum	11383964	3399856304
NZ18	PRJNA656389	Buffalo	Abomasum	21084300	6298004552
NZ2	PRJNA656389	Buffalo	Abomasum	5840787	1743862134
NZ21	PRJNA656389	Buffalo	Abomasum	24182583	7225170879
NZ22	PRJNA656389	Buffalo	Abomasum	9153058	2733016250
NZ24	PRJNA656389	Buffalo	Abomasum	16074571	4797683057
NZ25	PRJNA656389	Buffalo	Abomasum	20346588	6078198071
NZ26	PRJNA656389	Buffalo	Abomasum	20224149	6042220970
NZ27	PRJNA656389	Buffalo	Abomasum	23319480	6967450867
NZ29	PRJNA656389	Buffalo	Abomasum	4177874	1233978434
NZ3	PRJNA656389	Buffalo	Abomasum	15879122	4745797826
NZ32	PRJNA656389	Buffalo	Abomasum	17260863	5154979147
NZ33	PRJNA656389	Buffalo	Abomasum	11551449	3452715443
NZ35	PRJNA656389	Buffalo	Abomasum	4952799	1478441143
NZ4	PRJNA656389	Buffalo	Abomasum	19035797	5687924704
NZ5	PRJNA656389	Buffalo	Abomasum	15455282	4616401985
NZ6	PRJNA656389	Buffalo	Abomasum	15595792	4658603093
NZ7	PRJNA656389	Buffalo	Abomasum	18918991	5651148804
S-1_BDME192032754-1a	PRJNA656389	Buffalo	Rumen	23985332	7158137950
S-1_FDME192071053-1a	PRJNA656389	Buffalo	Rumen	20712050	6175111032
S-11_BDME192032764-1a	PRJNA656389	Buffalo	Rumen	23743586	7086540991
S-11-071_FDME192071055-1a	PRJNA656389	Buffalo	Rumen	21969545	6550167896
S-12_BDME192032765-1a	PRJNA656389	Buffalo	Rumen	29479226	8797845876
S-13_BDME192032766-1a	PRJNA656389	Buffalo	Rumen	30130004	8993955301
S-14_BDME192032767-1a	PRJNA656389	Buffalo	Rumen	25788749	7706315955
S-15_BDME192032768-1a	PRJNA656389	Buffalo	Rumen	18891876	5638880747
S-16_BDME192032769-1a	PRJNA656389	Buffalo	Rumen	23006503	6874687511
S-17_BDME192032770-1a	PRJNA656389	Buffalo	Rumen	28865225	8618681006
S-17-0037_FDME192071048-1a	PRJNA656389	Buffalo	Rumen	20909616	6236796196
S-18_BDME192032771-1a	PRJNA656389	Buffalo	Rumen	29589285	8826782053
S-18-0084_FDME192071051-1a	PRJNA656389	Buffalo	Rumen	24863713	7428864670
S-19_BDME192032772-1a	PRJNA656389	Buffalo	Rumen	31602218	9430118215
S-19-0086_FDME192071060-1a	PRJNA656389	Buffalo	Rumen	21740370	6480207687
S-2_BDME192032755-1a	PRJNA656389	Buffalo	Rumen	23763851	7075327625
S-20_BDME192032773-1a	PRJNA656389	Buffalo	Rumen	30777636	9195000258
S-20-0040_FDME192071062-1a	PRJNA656389	Buffalo	Rumen	23729424	7091342721
S-2-0033_FDME192071052-1a	PRJNA656389	Buffalo	Rumen	23150747	6904814517
S-21_BDME192032774-1a	PRJNA656389	Buffalo	Rumen	23256066	6946164908
S-21_FDME192071056-1a	PRJNA656389	Buffalo	Rumen	22491057	6707674765
S-21_FDME192071058-1a	PRJNA656389	Buffalo	Rumen	22926243	6853932830
S-22_BDME192032775-1a	PRJNA656389	Buffalo	Rumen	23293578	6958834864
S-22_FDME192071049-1a	PRJNA656389	Buffalo	Rumen	19020631	5673923927
S-23_BDME192032776-1a	PRJNA656389	Buffalo	Rumen	27452898	8190141105
S-23_FDME192071050-1a	PRJNA656389	Buffalo	Rumen	20677732	6157400193
S-24_BDME192032777-1a	PRJNA656389	Buffalo	Rumen	22427374	6696501878
S-24_FDME192071042-1a	PRJNA656389	Buffalo	Rumen	20006090	5956873710
S-24-0082_FDME192071063-1a	PRJNA656389	Buffalo	Rumen	22882597	6840109281
S-25_BDME192032778-1a	PRJNA656389	Buffalo	Rumen	29882276	8923572476
S-25_FDME192071039-1a	PRJNA656389	Buffalo	Rumen	20029300	5972202692
S-26_BDME192032779-1a	PRJNA656389	Buffalo	Rumen	23212574	6921689279
S-26_FDME192071045-1a	PRJNA656389	Buffalo	Rumen	19690938	5860881204
S-27_BDME192032780-1a	PRJNA656389	Buffalo	Rumen	18185087	5434902896
S-28_BDME192032781-1a	PRJNA656389	Buffalo	Rumen	26778032	7995565360
S-28_FDME192071034-1a	PRJNA656389	Buffalo	Rumen	21354090	6377902781
S-29_BDME192032782-1a	PRJNA656389	Buffalo	Rumen	26482190	7892215043
S-29_FDME192071030-1a	PRJNA656389	Buffalo	Rumen	20413846	6092385725
S-3_BDME192032756-1a	PRJNA656389	Buffalo	Rumen	23077198	6888591681
S-30_BDME192032783-1a	PRJNA656389	Buffalo	Rumen	27541830	8221421446
S-31_BDME192032784-1a	PRJNA656389	Buffalo	Rumen	26161324	7786097569
S-32_BDME192032785-1a	PRJNA656389	Buffalo	Rumen	26650135	7959291537
S-33_BDME192032786-1a	PRJNA656389	Buffalo	Rumen	24530204	7325254154
S-34_BDME192032787-1a	PRJNA656389	Buffalo	Rumen	24977185	7459102985
S-35_FDME192071059-1a	PRJNA656389	Buffalo	Rumen	21536944	6417738614
S-36_BDME192032788-1a	PRJNA656389	Buffalo	Rumen	22974196	6860359484
S-37_BDME192032789-1a	PRJNA656389	Buffalo	Rumen	22243260	6644616041
S-38_BDME192032790-1a	PRJNA656389	Buffalo	Rumen	24259734	7236023355
S-39_BDME192032791-1a	PRJNA656389	Buffalo	Rumen	29163572	8702145725
S-4_BDME192032757-1a	PRJNA656389	Buffalo	Rumen	23029767	6860850105
S-4_FDME192071061-1a	PRJNA656389	Buffalo	Rumen	22643659	6764833165
S-40_BDME192032792-1a	PRJNA656389	Buffalo	Rumen	22529938	6721471254
S-41_BDME192032793-1a	PRJNA656389	Buffalo	Rumen	22242141	6642833500
S-42_BDME192032794-1a	PRJNA656389	Buffalo	Rumen	24046993	7165076396
S-43_BDME192032795-1a	PRJNA656389	Buffalo	Rumen	20180275	6025332566
S-44_BDME192032796-1a	PRJNA656389	Buffalo	Rumen	21101567	6301572992
S-45_BDME192032797-1a	PRJNA656389	Buffalo	Rumen	24042956	7179531108
S-46_BDME192032798-1a	PRJNA656389	Buffalo	Rumen	23588677	7042365807
S-47_BDME192032799-1a	PRJNA656389	Buffalo	Rumen	24837174	7415443518
S-48_BDME192032800-1a	PRJNA656389	Buffalo	Rumen	16442828	4901051086
S-49_BDME192032801-1a	PRJNA656389	Buffalo	Rumen	21274723	6350185269
S-5_BDME192032758-1a	PRJNA656389	Buffalo	Rumen	22638838	6751800476
S-50_BDME192032802-1a	PRJNA656389	Buffalo	Rumen	24375280	7276284075
S-5-0083_FDME192071057-1a	PRJNA656389	Buffalo	Rumen	19474570	5805241367
S-509_FDME192071031-1a	PRJNA656389	Buffalo	Rumen	20960763	6254188675
S-51_BDME192032803-1a	PRJNA656389	Buffalo	Rumen	20477936	6113367480
S-511_FDME192071032-1a	PRJNA656389	Buffalo	Rumen	21312718	6346594827
S-515_FDME192071036-1a	PRJNA656389	Buffalo	Rumen	21433948	6402357113
S-516_FDME192071037-1a	PRJNA656389	Buffalo	Rumen	23806803	7111019324
S-517_FDME192071046-1a	PRJNA656389	Buffalo	Rumen	16976499	5035690975
S-518_FDME192071038-1a	PRJNA656389	Buffalo	Rumen	19246594	5723962265
S-519_FDME192071040-1a	PRJNA656389	Buffalo	Rumen	27531268	8211479606
S-52_BDME192032804-1a	PRJNA656389	Buffalo	Rumen	21144087	6308471125
S-520_FDME192071044-1a	PRJNA656389	Buffalo	Rumen	18145585	5397961519
S-521_FDME192071035-1a	PRJNA656389	Buffalo	Rumen	19663057	5869967144
S-523_FDME192071043-1a	PRJNA656389	Buffalo	Rumen	19513691	5815573894
S-53_BDME192032805-1a	PRJNA656389	Buffalo	Rumen	23742023	7091081470
S-54_BDME192032806-1a	PRJNA656389	Buffalo	Rumen	26278882	7842658809
S-55_BDME192032807-1a	PRJNA656389	Buffalo	Rumen	24156836	7209722169
S-56_BDME192032808-1a	PRJNA656389	Buffalo	Rumen	24748741	7386695624
S-57_BDME192032809-1a	PRJNA656389	Buffalo	Rumen	25094403	7486058847
S-58_BDME192032810-1a	PRJNA656389	Buffalo	Rumen	21364928	6377204725
S-59_BDME192032811-1a	PRJNA656389	Buffalo	Rumen	19921918	5943374508
S-6_BDME192032759-1a	PRJNA656389	Buffalo	Rumen	23359042	6969559434
S-60_BDME192032812-1a	PRJNA656389	Buffalo	Rumen	22680931	6774356756
S-61_BDME192032813-1a	PRJNA656389	Buffalo	Rumen	25379727	7567582136
S-62_BDME192032814-1a	PRJNA656389	Buffalo	Rumen	21147194	6315938284
S-63_BDME192032815-1a	PRJNA656389	Buffalo	Rumen	25931046	7729937555
S-64_BDME192032816-1a	PRJNA656389	Buffalo	Rumen	22869152	6821401915
S-64_FDME192071033-1a	PRJNA656389	Buffalo	Rumen	23591744	7039860072
S-7_BDME192032760-1a	PRJNA656389	Buffalo	Rumen	24724928	7377928254
S-7-0038_FDME192071054-1a	PRJNA656389	Buffalo	Rumen	23067259	6871708308
S-75_FDME192071041-1a	PRJNA656389	Buffalo	Rumen	18874151	5629528922
S-8_BDME192032761-1a	PRJNA656389	Buffalo	Rumen	29237169	8725033969
S-8-0036_FDME192071065-1a	PRJNA656389	Buffalo	Rumen	26654200	7966427735
S-9_BDME192032762-1a	PRJNA656389	Buffalo	Rumen	24533980	7326470552
S-9-0039_FDME192071066-1a	PRJNA656389	Buffalo	Rumen	22350396	6681899539
S-97_FDME192071047-1a	PRJNA656389	Buffalo	Rumen	14431418	4298037338
SBCM1_S159_L002	PRJNA656389	Buffalo	Rectum	21701918	6536406807
SBCM10_S156_L002	PRJNA656389	Buffalo	Rectum	23886904	7193870625
SBCM11_S163_L002	PRJNA656389	Buffalo	Rectum	22620280	6812277983
SBCM12_S160_L002	PRJNA656389	Buffalo	Rectum	24672298	7430116087
SBCM13_S158_L002	PRJNA656389	Buffalo	Rectum	24355948	7334811924
SBCM14_S166_L002	PRJNA656389	Buffalo	Rectum	26418732	7956077985
SBCM2_S164_L002	PRJNA656389	Buffalo	Rectum	23814063	7172975182
SBCM3_S154_L002	PRJNA656389	Buffalo	Rectum	24105575	7260009517
SBCM4_S162_L002	PRJNA656389	Buffalo	Rectum	24610420	7412480278
SBCM5_S155_L002	PRJNA656389	Buffalo	Rectum	23752166	7153758712
SBCM6_S161_L002	PRJNA656389	Buffalo	Rectum	21889306	6591320933
SBCM7_S157_L002	PRJNA656389	Buffalo	Rectum	22300892	6716256735
SBCM8_S167_L002	PRJNA656389	Buffalo	Rectum	21965046	6615682121
SBCM9_S165_L002	PRJNA656389	Buffalo	Rectum	24556569	7396895014
SMS1	PRJNA656389	Buffalo	Rectum	27651229	8269662280
SMS10	PRJNA656389	Buffalo	Rectum	22390560	6696176938
SMS11	PRJNA656389	Buffalo	Rectum	25263907	7556505505
SMS12	PRJNA656389	Buffalo	Rectum	13482488	4030070413
SMS13	PRJNA656389	Buffalo	Rectum	28845319	8626036008
SMS14	PRJNA656389	Buffalo	Rectum	22058863	6597686788
SMS4	PRJNA656389	Buffalo	Rectum	21053616	6296937642
SMS5	PRJNA656389	Buffalo	Rectum	27629760	8263333401
SMS6	PRJNA656389	Buffalo	Rectum	29408005	8786563974
SMS7	PRJNA656389	Buffalo	Rectum	26749588	7997387476
SMS8	PRJNA656389	Buffalo	Rectum	6364054	1901448776
SMS9	PRJNA656389	Buffalo	Rectum	21599452	6461157200
SNS1	PRJNA656389	Buffalo	Rectum	24416658	7302395017
SNS10	PRJNA656389	Buffalo	Rectum	6890258	2061274594
SNS12	PRJNA656389	Buffalo	Rectum	12903038	3858057357
SNS14	PRJNA656389	Buffalo	Rectum	10684936	3193761282
SNS15	PRJNA656389	Buffalo	Rectum	26070181	7795350148
SNS2	PRJNA656389	Buffalo	Rectum	32750074	9796436045
SNS3	PRJNA656389	Buffalo	Rectum	12595506	3766615000
SNS4	PRJNA656389	Buffalo	Rectum	23270052	6960528558
SNS5	PRJNA656389	Buffalo	Rectum	14132552	4226239294
SNS6	PRJNA656389	Buffalo	Rectum	11921460	3565043227
SNS7	PRJNA656389	Buffalo	Rectum	22605418	6759772017
SNS8	PRJNA656389	Buffalo	Rectum	13384514	4001244887
SNS9	PRJNA656389	Buffalo	Rectum	23875490	7141489141
SZCM1	PRJNA656389	Buffalo	Rectum	27691881	8275082915
SZCM10	PRJNA656389	Buffalo	Rectum	25314666	7573295155
SZCM11	PRJNA656389	Buffalo	Rectum	24551655	7346587218
SZCM12	PRJNA656389	Buffalo	Rectum	34531054	10330377755
SZCM13	PRJNA656389	Buffalo	Rectum	31528327	9431981953
SZCM14	PRJNA656389	Buffalo	Rectum	29034066	8684916664
SZCM15	PRJNA656389	Buffalo	Rectum	30172670	9025103299
SZCM16	PRJNA656389	Buffalo	Rectum	26707008	7990763017
SZCM17	PRJNA656389	Buffalo	Rectum	30279850	9057415466
SZCM18	PRJNA656389	Buffalo	Rectum	25373403	7588294796
SZCM19	PRJNA656389	Buffalo	Rectum	25872679	7741139704
SZCM2	PRJNA656389	Buffalo	Rectum	23214858	6937615016
SZCM20	PRJNA656389	Buffalo	Rectum	27260429	8152976518
SZCM21	PRJNA656389	Buffalo	Rectum	24158335	7226160810
SZCM22	PRJNA656389	Buffalo	Rectum	27005217	8076766701
SZCM23	PRJNA656389	Buffalo	Rectum	25024898	7484180961
SZCM24	PRJNA656389	Buffalo	Rectum	32324043	9667914347
SZCM25	PRJNA656389	Buffalo	Rectum	31640504	9462945382
SZCM26	PRJNA656389	Buffalo	Rectum	28850981	8609915293
SZCM27	PRJNA656389	Buffalo	Rectum	26929834	8049188149
SZCM28	PRJNA656389	Buffalo	Rectum	27471508	8213561303
SZCM29	PRJNA656389	Buffalo	Rectum	29554732	8839405303
SZCM3	PRJNA656389	Buffalo	Rectum	28212984	8432875997
SZCM30	PRJNA656389	Buffalo	Rectum	26682876	7979822687
SZCM4	PRJNA656389	Buffalo	Rectum	26580457	7948640822
SZCM5	PRJNA656389	Buffalo	Rectum	26228059	7839243164
SZCM6	PRJNA656389	Buffalo	Rectum	25930283	7751963787
SZCM7	PRJNA656389	Buffalo	Rectum	24530627	7337481314
SZCM8	PRJNA656389	Buffalo	Rectum	30049723	8988950387
SZCM9	PRJNA656389	Buffalo	Rectum	25098461	7505816619
XBCN	PRJNA656389	Buffalo	Rectum	21021114	6251299735
XBCN1	PRJNA656389	Buffalo	Rectum	19096342	5689071706
XBCN10	PRJNA656389	Buffalo	Rectum	25465408	7612046734
XBCN11	PRJNA656389	Buffalo	Rectum	29515576	8822719813
XBCN12	PRJNA656389	Buffalo	Rectum	19978604	5953351756
XBCN13	PRJNA656389	Buffalo	Rectum	25957993	7760857685
XBCN14	PRJNA656389	Buffalo	Rectum	154639526	6467409378
XBCN15	PRJNA656389	Buffalo	Rectum	33007597	9867413363
XBCN16	PRJNA656389	Buffalo	Rectum	15290491	4555052063
XBCN17	PRJNA656389	Buffalo	Rectum	25764227	7704295598
XBCN18	PRJNA656389	Buffalo	Rectum	17587640	5239305189
XBCN19	PRJNA656389	Buffalo	Rectum	27202787	8131820367
XBCN2	PRJNA656389	Buffalo	Rectum	22127282	6592940873
XBCN20	PRJNA656389	Buffalo	Rectum	108214984	5063605044
XBCN21	PRJNA656389	Buffalo	Rectum	26367443	7883200931
XBCN22	PRJNA656389	Buffalo	Rectum	26652011	7967844619
XBCN24	PRJNA656389	Buffalo	Rectum	17690189	5271166601
XBCN25	PRJNA656389	Buffalo	Rectum	19987259	5952177483
XBCN26	PRJNA656389	Buffalo	Rectum	99892479	4630597401
XBCN27	PRJNA656389	Buffalo	Rectum	115673201	5268322589
XBCN28	PRJNA656389	Buffalo	Rectum	21975322	6540613620
XBCN29	PRJNA656389	Buffalo	Rectum	22834906	6806079752
XBCN3	PRJNA656389	Buffalo	Rectum	16915473	5030835957
XBCN30	PRJNA656389	Buffalo	Rectum	26268938	7825897102
XBCN31	PRJNA656389	Buffalo	Rectum	20748832	6184460440
XBCN32	PRJNA656389	Buffalo	Rectum	24149936	7192397374
XBCN33	PRJNA656389	Buffalo	Rectum	127850693	5973847501
XBCN34	PRJNA656389	Buffalo	Rectum	19460708	5781435999
XBCN35	PRJNA656389	Buffalo	Rectum	19889157	5916177585
XBCN5	PRJNA656389	Buffalo	Rectum	30571858	9143117646
XBCN6	PRJNA656389	Buffalo	Rectum	21459295	6393521824
XBCN7	PRJNA656389	Buffalo	Rectum	22734507	6796118833
XBCN8	PRJNA656389	Buffalo	Rectum	92307032	3072369113
XBCN9	PRJNA656389	Buffalo	Rectum	21219373	6324002268
XBDN1	PRJNA656389	Buffalo	Rectum	21229648	6327129413
XBDN2	PRJNA656389	Buffalo	Rectum	23199695	6908569504
XBDN3	PRJNA656389	Buffalo	Rectum	17989157	5362745177
XBDN4	PRJNA656389	Buffalo	Rectum	17541022	5218115298
XBDN5	PRJNA656389	Buffalo	Rectum	21055167	6266900680
XBDN6	PRJNA656389	Buffalo	Rectum	23312370	6945333839
XBDN7	PRJNA656389	Buffalo	Rectum	20089055	5982162787
YCN10	PRJNA656389	Buffalo	Rectum	136493824	6709254493
YCN11	PRJNA656389	Buffalo	Rectum	15685409	4680114145
YCN12	PRJNA656389	Buffalo	Rectum	16430940	4903082606
YCN14	PRJNA656389	Buffalo	Rectum	19963022	5965361414
YCN15	PRJNA656389	Buffalo	Rectum	19109592	5707732336
YCN16	PRJNA656389	Buffalo	Rectum	17346897	5175752197
YCN17	PRJNA656389	Buffalo	Rectum	19667650	5873453348
YCN18	PRJNA656389	Buffalo	Rectum	19728847	5892566329
YCN19	PRJNA656389	Buffalo	Rectum	16520346	4933661272
YCN20	PRJNA656389	Buffalo	Rectum	25007983	7477212449
YCN21	PRJNA656389	Buffalo	Rectum	18751167	5602037335
YCN22	PRJNA656389	Buffalo	Rectum	13653320	4073505750
YCN23	PRJNA656389	Buffalo	Rectum	20007238	5970910741
YCN24	PRJNA656389	Buffalo	Rectum	57827956	17246945228
YCN25	PRJNA656389	Buffalo	Rectum	40552408	12099121238
YCN26	PRJNA656389	Buffalo	Rectum	23843876	7127508813
YCN27	PRJNA656389	Buffalo	Rectum	13587745	4056964734
YCN28	PRJNA656389	Buffalo	Rectum	17932625	5355738192
YCN29	PRJNA656389	Buffalo	Rectum	16890753	5044589012
YCN30	PRJNA656389	Buffalo	Rectum	59816175	17840151941
YCN31	PRJNA656389	Buffalo	Rectum	244412215	72917807866
YCN32	PRJNA656389	Buffalo	Rectum	17390883	5193691063
YCN33	PRJNA656389	Buffalo	Rectum	18685788	5582258626
YCN34	PRJNA656389	Buffalo	Rectum	22725371	6778709805
YCN35	PRJNA656389	Buffalo	Rectum	16371767	4888728188
YCN4	PRJNA656389	Buffalo	Rectum	28530975	8520009709
YCN5	PRJNA656389	Buffalo	Rectum	17428205	5201842834
YCN6	PRJNA656389	Buffalo	Rectum	24430901	7305190878
YCN7	PRJNA656389	Buffalo	Rectum	25822607	7718886340
YCN8	PRJNA656389	Buffalo	Rectum	24628977	7363051890
YCN9	PRJNA656389	Buffalo	Rectum	19532773	5835050566
SRR12529210	PRJNA657455	Buffalo	Rumen	178952563	53003950929
SRR12529211	PRJNA657455	Buffalo	Rumen	164610289	48698851359
SRR12529212	PRJNA657455	Buffalo	Rumen	104384311	30874965006
SRR12529213	PRJNA657455	Buffalo	Rumen	164747349	48756478136
SRR12529214	PRJNA657455	Buffalo	Rumen	194968152	57711246215
SRR12529215	PRJNA657455	Buffalo	Reticulum	71605327	21204566117
SRR12529216	PRJNA657455	Buffalo	Reticulum	67917707	19918893563
SRR12529217	PRJNA657455	Buffalo	Reticulum	28180394	4168996067
SRR12529218	PRJNA657455	Buffalo	Reticulum	69777824	20652323799
SRR12529219	PRJNA657455	Buffalo	Reticulum	64100801	18989539191
SRR12529221	PRJNA657455	Buffalo	Rectum	47571965	14077711490
SRR12529222	PRJNA657455	Buffalo	Rectum	27909337	8234660103
SRR12529223	PRJNA657455	Buffalo	Rectum	32676808	9621029961
SRR12529224	PRJNA657455	Buffalo	Rectum	45984778	13653480848
SRR12529225	PRJNA657455	Buffalo	Rectum	66118923	19583131604
SRR12529226	PRJNA657455	Buffalo	Omasum	83093625	24588412427
SRR12529227	PRJNA657455	Buffalo	Omasum	80629389	23868144401
SRR12529228	PRJNA657455	Buffalo	Omasum	67468981	19923967150
SRR12529229	PRJNA657455	Buffalo	Omasum	65876326	19479019532
SRR12529230	PRJNA657455	Buffalo	Omasum	70550693	20969866901
SRR12529232	PRJNA657455	Buffalo	Jejunum	17512540	5150761295
SRR12529233	PRJNA657455	Buffalo	Jejunum	20136499	5875782139
SRR12529234	PRJNA657455	Buffalo	Jejunum	9888753	2870961573
SRR12529235	PRJNA657455	Buffalo	Jejunum	25697827	7513148609
SRR12529236	PRJNA657455	Buffalo	Jejunum	2518494	717482855
SRR12529237	PRJNA657455	Buffalo	Ileum	5744119	1675519509
SRR12529238	PRJNA657455	Buffalo	Ileum	3886691	1098494009
SRR12529239	PRJNA657455	Buffalo	Ileum	11782990	3452489829
SRR12529240	PRJNA657455	Buffalo	Ileum	5774848	1671180299
SRR12529241	PRJNA657455	Buffalo	Ileum	4693662	1365091544
SRR12529243	PRJNA657455	Buffalo	Duodenum	2203714	623761984
SRR12529244	PRJNA657455	Buffalo	Duodenum	36459080	10632917790
SRR12529245	PRJNA657455	Buffalo	Duodenum	2809417	776462830
SRR12529246	PRJNA657455	Buffalo	Duodenum	14822209	4286520545
SRR12529247	PRJNA657455	Buffalo	Duodenum	49361419	14503730678
SRR12529248	PRJNA657455	Buffalo	Colon	49088189	14531189170
SRR12529249	PRJNA657455	Buffalo	Colon	12065937	3514398627
SRR12529250	PRJNA657455	Buffalo	Colon	23809858	6992240356
SRR12529251	PRJNA657455	Buffalo	Colon	34188394	10085452594
SRR12529252	PRJNA657455	Buffalo	Colon	61627063	18251203623
SRR12529254	PRJNA657455	Buffalo	Cecum	70182003	20779775909
SRR12529255	PRJNA657455	Buffalo	Cecum	69589533	20594863848
SRR12529256	PRJNA657455	Buffalo	Cecum	57731481	17065483622
SRR12529257	PRJNA657455	Buffalo	Cecum	59288334	17535472438
SRR12529258	PRJNA657455	Buffalo	Cecum	63982871	18895326532
SRR12529259	PRJNA657455	Buffalo	Abomasum	63384227	18759061801
SRR12529260	PRJNA657455	Buffalo	Abomasum	57868010	17091108819
SRR12529261	PRJNA657455	Buffalo	Abomasum	10903197	3199370853
SRR12529262	PRJNA657455	Buffalo	Abomasum	63435358	18722413190
SRR12529263	PRJNA657455	Buffalo	Abomasum	61471316	18173087179
SRR7702750	PRJNA486341	Camel	Rectum	1189814	582870700
SRR7702751	PRJNA486341	Camel	Small Intestine	3068208	1543197740
SRR7702752	PRJNA486341	Camel	Large Intestine	1612626	802168751
SRR7702753	PRJNA486341	Camel	Rectum	1305855	658062648
SRR7702754	PRJNA486341	Camel	Small Intestine	1437831	701904463
SRR7702755	PRJNA486341	Camel	Large Intestine	5493661	3062256182
ERR983262	PRJEB10338	Cattle	Rumen	42853249	8495457982
ERR983263	PRJEB10338	Cattle	Rumen	47836127	9475028005
ERR983264	PRJEB10338	Cattle	Rumen	63006545	12477454889
ERR983265	PRJEB10338	Cattle	Rumen	66564747	13221138922
ERR983266	PRJEB10338	Cattle	Rumen	41111170	8156514656
ERR983267	PRJEB10338	Cattle	Rumen	54357464	10777125435
ERR983268	PRJEB10338	Cattle	Rumen	68657371	13608690689
ERR983269	PRJEB10338	Cattle	Rumen	43071538	8534168548
ERR2027889	PRJEB21624	Cattle	Rumen	14700934	2518413923
ERR2027890	PRJEB21624	Cattle	Rumen	13284675	2256359157
ERR2027891	PRJEB21624	Cattle	Rumen	15271304	2615923598
ERR2027892	PRJEB21624	Cattle	Rumen	14032681	2391645709
ERR2027893	PRJEB21624	Cattle	Rumen	12167300	2029215296
ERR2027894	PRJEB21624	Cattle	Rumen	14323218	2465362697
ERR2027895	PRJEB21624	Cattle	Rumen	13403025	2296147251
ERR2027896	PRJEB21624	Cattle	Rumen	12614169	2138992952
ERR2027897	PRJEB21624	Cattle	Rumen	12028834	2034570760
ERR2027898	PRJEB21624	Cattle	Rumen	12818153	2113163808
ERR2027899	PRJEB21624	Cattle	Rumen	12242127	2073620473
ERR2027900	PRJEB21624	Cattle	Rumen	12443228	2109359368
ERR2027901	PRJEB21624	Cattle	Rumen	13449267	2277175958
ERR2027902	PRJEB21624	Cattle	Rumen	9980815	1688908272
ERR2027903	PRJEB21624	Cattle	Rumen	9889715	1658147020
ERR2027904	PRJEB21624	Cattle	Rumen	9462235	1590229024
ERR2027905	PRJEB21624	Cattle	Rumen	11987591	2011837379
ERR2027906	PRJEB21624	Cattle	Rumen	11680004	1974757458
ERR2027907	PRJEB21624	Cattle	Rumen	9881857	1628172642
ERR2027908	PRJEB21624	Cattle	Rumen	13898608	2320335371
ERR2027909	PRJEB21624	Cattle	Rumen	11837013	1969710153
ERR2027910	PRJEB21624	Cattle	Rumen	13476382	2199243267
ERR2027911	PRJEB21624	Cattle	Rumen	12680102	2070928975
ERR2027912	PRJEB21624	Cattle	Rumen	25250406	3571037925
ERR2027913	PRJEB21624	Cattle	Rumen	19374970	2794881241
ERR2027914	PRJEB21624	Cattle	Rumen	12099629	2023731486
ERR2027915	PRJEB21624	Cattle	Rumen	3412550	475834486
ERR2027916	PRJEB21624	Cattle	Rumen	3533684	496088406
ERR2027917	PRJEB21624	Cattle	Rumen	3531402	496368511
ERR2027918	PRJEB21624	Cattle	Rumen	3351334	470702676
ERR2027919	PRJEB21624	Cattle	Rumen	2545025	354099811
ERR2027920	PRJEB21624	Cattle	Rumen	2787660	392304625
ERR2027921	PRJEB21624	Cattle	Rumen	2782497	384214351
ERR2027922	PRJEB21624	Cattle	Rumen	2639066	371809088
ERR2027923	PRJEB21624	Cattle	Rumen	12574376	2068133645
ERR2027924	PRJEB21624	Cattle	Rumen	10406158	1753584335
ERR2027925	PRJEB21624	Cattle	Rumen	16586825	2632363271
ERR2027926	PRJEB21624	Cattle	Rumen	10740804	1757802940
ERR2027927	PRJEB21624	Cattle	Rumen	9086091	1477539342
ERR2027928	PRJEB21624	Cattle	Rumen	2547313	351570308
ERR2027929	PRJEB21624	Cattle	Rumen	2880417	400968786
ERR2027930	PRJEB21624	Cattle	Rumen	2850607	393377969
ERR2282092	PRJEB21624	Cattle	Rumen	3028996	423278806
ERR2530126	PRJEB21624	Cattle	Rumen	10987020	1715258603
ERR2530127	PRJEB21624	Cattle	Rumen	26483652	4161919230
ERR2200465	PRJEB23561	Cattle	Rumen	12801391	2185283129
ERR2200466	PRJEB23561	Cattle	Rumen	14809675	2536912510
ERR2200467	PRJEB23561	Cattle	Rumen	14700934	2518413923
ERR2200468	PRJEB23561	Cattle	Rumen	13284675	2256359157
ERR2200469	PRJEB23561	Cattle	Rumen	15271304	2615923598
ERR2200470	PRJEB23561	Cattle	Rumen	14032681	2391645709
ERR2200471	PRJEB23561	Cattle	Rumen	12167300	2029215296
ERR2200472	PRJEB23561	Cattle	Rumen	14323218	2465362697
ERR2200473	PRJEB23561	Cattle	Rumen	13403025	2296147251
ERR2200474	PRJEB23561	Cattle	Rumen	12614169	2138992952
ERR2200475	PRJEB23561	Cattle	Rumen	12028834	2034570760
ERR2200476	PRJEB23561	Cattle	Rumen	12818153	2113163808
ERR2200477	PRJEB23561	Cattle	Rumen	12242127	2073620473
ERR2200478	PRJEB23561	Cattle	Rumen	12443228	2109359368
ERR2200479	PRJEB23561	Cattle	Rumen	13449267	2277175958
ERR2200480	PRJEB23561	Cattle	Rumen	9980815	1688908272
ERR2200481	PRJEB23561	Cattle	Rumen	9889715	1658147020
ERR2200482	PRJEB23561	Cattle	Rumen	9462235	1590229024
ERR2200483	PRJEB23561	Cattle	Rumen	11987591	2011837379
ERR2200484	PRJEB23561	Cattle	Rumen	11680004	1974757458
ERR2200485	PRJEB23561	Cattle	Rumen	9881857	1628172642
ERR2200486	PRJEB23561	Cattle	Rumen	13898608	2320335371
ERR2200487	PRJEB23561	Cattle	Rumen	11837013	1969710153
ERR2200488	PRJEB23561	Cattle	Rumen	13476382	2199243267
ERR2200489	PRJEB23561	Cattle	Rumen	12680102	2070928975
ERR2200490	PRJEB23561	Cattle	Rumen	25250406	3571037925
ERR2200491	PRJEB23561	Cattle	Rumen	19374970	2794881241
ERR2200492	PRJEB23561	Cattle	Rumen	12099629	2023731486
ERR2200493	PRJEB23561	Cattle	Rumen	3412550	475834486
ERR2200494	PRJEB23561	Cattle	Rumen	3533684	496088406
ERR2200495	PRJEB23561	Cattle	Rumen	3531402	496368511
ERR2200496	PRJEB23561	Cattle	Rumen	3351334	470702676
ERR2200497	PRJEB23561	Cattle	Rumen	2545025	354099811
ERR2200498	PRJEB23561	Cattle	Rumen	2787660	392304625
ERR2200499	PRJEB23561	Cattle	Rumen	2782497	384214351
ERR2200500	PRJEB23561	Cattle	Rumen	2639066	371809088
ERR2200501	PRJEB23561	Cattle	Rumen	12574376	2068133645
ERR2200502	PRJEB23561	Cattle	Rumen	10406158	1753584335
ERR2200503	PRJEB23561	Cattle	Rumen	16586825	2632363271
ERR2200504	PRJEB23561	Cattle	Rumen	10740804	1757802940
ERR2200505	PRJEB23561	Cattle	Rumen	9086091	1477539342
ERR2200506	PRJEB23561	Cattle	Rumen	2547313	351570308
ERR2200507	PRJEB23561	Cattle	Rumen	2880417	400968786
ERR2200508	PRJEB23561	Cattle	Rumen	2850607	393377969
ERR2200509	PRJEB23561	Cattle	Rumen	3028996	423278806
ERR2200510	PRJEB23561	Cattle	Rumen	10987020	1715258603
ERR2200511	PRJEB23561	Cattle	Rumen	26483652	4161919230
ERR2200512	PRJEB23561	Cattle	Rumen	44457418	7176293342
ERR2200513	PRJEB23561	Cattle	Rumen	10844984	1773614571
ERR2200514	PRJEB23561	Cattle	Rumen	12931592	2101473843
ERR2200515	PRJEB23561	Cattle	Rumen	13188653	2146410700
ERR2200516	PRJEB23561	Cattle	Rumen	8834131	1446972489
ERR2200517	PRJEB23561	Cattle	Rumen	24114142	3386631544
ERR2200518	PRJEB23561	Cattle	Rumen	41970164	6754608985
ERR2200519	PRJEB23561	Cattle	Rumen	12918514	1998765604
ERR2200520	PRJEB23561	Cattle	Rumen	24487718	3860591382
ERR2200521	PRJEB23561	Cattle	Rumen	15126728	2427560061
ERR2200522	PRJEB23561	Cattle	Rumen	2805027	388632101
ERR2200523	PRJEB23561	Cattle	Rumen	3107546	433593445
ERR2200524	PRJEB23561	Cattle	Rumen	3098980	428798071
ERR2200525	PRJEB23561	Cattle	Rumen	3285806	452462092
ERR2200526	PRJEB23561	Cattle	Rumen	2416618	333474505
ERR2200527	PRJEB23561	Cattle	Rumen	2752923	383221334
ERR2200528	PRJEB23561	Cattle	Rumen	2730284	376769708
ERR2200529	PRJEB23561	Cattle	Rumen	2898663	405139371
ERR2200530	PRJEB23561	Cattle	Rumen	23544754	3327387088
ERR2200531	PRJEB23561	Cattle	Rumen	14796519	2451642348
ERR2200532	PRJEB23561	Cattle	Rumen	12654790	2093495013
ERR2200533	PRJEB23561	Cattle	Rumen	15258477	2550747165
ERR2200534	PRJEB23561	Cattle	Rumen	15957354	2684619229
ERR2200535	PRJEB23561	Cattle	Rumen	13863902	2297310358
ERR2200536	PRJEB23561	Cattle	Rumen	10817351	1479657093
ERR2200537	PRJEB23561	Cattle	Rumen	9717725	1308125141
ERR2200538	PRJEB23561	Cattle	Rumen	13536150	2250955218
ERR2200539	PRJEB23561	Cattle	Rumen	21751999	3064599534
ERR2200540	PRJEB23561	Cattle	Rumen	16507781	2766941427
ERR2200541	PRJEB23561	Cattle	Rumen	12262302	2057083113
ERR2200542	PRJEB23561	Cattle	Rumen	3197955	445306334
ERR2200543	PRJEB23561	Cattle	Rumen	3384964	475069212
ERR2200544	PRJEB23561	Cattle	Rumen	3384121	475574080
ERR2200545	PRJEB23561	Cattle	Rumen	3211359	450941307
ERR2200546	PRJEB23561	Cattle	Rumen	12458485	2066299309
ERR2200547	PRJEB23561	Cattle	Rumen	11898360	1963816740
ERR2200548	PRJEB23561	Cattle	Rumen	14592913	2412155562
ERR2200549	PRJEB23561	Cattle	Rumen	14720912	2439926942
ERR2200550	PRJEB23561	Cattle	Rumen	11435139	1908758608
ERR2200551	PRJEB23561	Cattle	Rumen	12293281	2047618338
ERR2200552	PRJEB23561	Cattle	Rumen	2655273	368069398
ERR2200553	PRJEB23561	Cattle	Rumen	3007508	420084370
ERR2200554	PRJEB23561	Cattle	Rumen	2968140	411183948
ERR2200555	PRJEB23561	Cattle	Rumen	3143950	440568012
ERR2200556	PRJEB23561	Cattle	Rumen	12795063	2110372539
ERR2200557	PRJEB23561	Cattle	Rumen	14272829	2340426888
ERR2200558	PRJEB23561	Cattle	Rumen	2684565	378066343
ERR2200559	PRJEB23561	Cattle	Rumen	2834632	396214958
ERR2200560	PRJEB23561	Cattle	Rumen	2834498	391554932
ERR2200561	PRJEB23561	Cattle	Rumen	2681044	375562326
ERR2200562	PRJEB23561	Cattle	Rumen	3412637	475171347
ERR2200563	PRJEB23561	Cattle	Rumen	3615004	507274842
ERR2200564	PRJEB23561	Cattle	Rumen	3614556	500146616
ERR2200565	PRJEB23561	Cattle	Rumen	3426115	481010905
ERR2200566	PRJEB23561	Cattle	Rumen	22526433	3117427235
ERR2200567	PRJEB23561	Cattle	Rumen	11498737	1938995958
ERR2200568	PRJEB23561	Cattle	Rumen	2682605	370960708
ERR2200569	PRJEB23561	Cattle	Rumen	2962456	412484071
ERR2200570	PRJEB23561	Cattle	Rumen	2952588	407630176
ERR2200571	PRJEB23561	Cattle	Rumen	3130535	437502784
ERR2200572	PRJEB23561	Cattle	Rumen	2142684	301142314
ERR2200573	PRJEB23561	Cattle	Rumen	2405751	336347278
ERR2200574	PRJEB23561	Cattle	Rumen	2415812	341214958
ERR2200575	PRJEB23561	Cattle	Rumen	2288443	320699454
ERR2200576	PRJEB23561	Cattle	Rumen	2965466	411304649
ERR2200577	PRJEB23561	Cattle	Rumen	3347031	467432358
ERR2200578	PRJEB23561	Cattle	Rumen	3285939	455137202
ERR2200579	PRJEB23561	Cattle	Rumen	3479380	487421063
ERR2200580	PRJEB23561	Cattle	Rumen	2537100	350556416
ERR2200581	PRJEB23561	Cattle	Rumen	2800739	391176876
ERR2200582	PRJEB23561	Cattle	Rumen	2799692	391786565
ERR2200583	PRJEB23561	Cattle	Rumen	2649474	370463149
ERR2200584	PRJEB23561	Cattle	Rumen	2505039	347864362
ERR2200585	PRJEB23561	Cattle	Rumen	2751518	384441643
ERR2200586	PRJEB23561	Cattle	Rumen	2730679	378514422
ERR2200587	PRJEB23561	Cattle	Rumen	2891041	405170372
ERR2200588	PRJEB23561	Cattle	Rumen	36651447	5569587953
ERR2200589	PRJEB23561	Cattle	Rumen	47845671	7752010768
ERR2200590	PRJEB23561	Cattle	Rumen	13555904	2141498094
ERR2200591	PRJEB23561	Cattle	Rumen	19870803	2794543189
ERR2200592	PRJEB23561	Cattle	Rumen	39258353	6309776613
ERR2200593	PRJEB23561	Cattle	Rumen	11746642	1822497957
ERR2200594	PRJEB23561	Cattle	Rumen	26319414	4150969421
ERR2200595	PRJEB23561	Cattle	Rumen	16139037	2581716327
ERR2200596	PRJEB23561	Cattle	Rumen	30752982	2542422660
ERR2200597	PRJEB23561	Cattle	Rumen	11786013	1982237524
ERR2200598	PRJEB23561	Cattle	Rumen	12021262	2020123302
ERR2200599	PRJEB23561	Cattle	Rumen	3169238	442215410
ERR2200600	PRJEB23561	Cattle	Rumen	3318560	466129160
ERR2200601	PRJEB23561	Cattle	Rumen	3326982	467843777
ERR2200602	PRJEB23561	Cattle	Rumen	3158014	437389192
ERR2200603	PRJEB23561	Cattle	Rumen	23210952	3255524875
ERR2200604	PRJEB23561	Cattle	Rumen	10257744	1404036899
ERR2200605	PRJEB23561	Cattle	Rumen	11251840	1555305281
ERR2200606	PRJEB23561	Cattle	Rumen	16956598	2813298304
ERR2200607	PRJEB23561	Cattle	Rumen	2466305	339774631
ERR2200608	PRJEB23561	Cattle	Rumen	2822313	392037160
ERR2200609	PRJEB23561	Cattle	Rumen	2815880	387689616
ERR2200610	PRJEB23561	Cattle	Rumen	2958524	407242739
ERR2200611	PRJEB23561	Cattle	Rumen	12234387	2062026183
ERR2200612	PRJEB23561	Cattle	Rumen	12820469	2127271350
ERR2200613	PRJEB23561	Cattle	Rumen	7201217	1142853026
ERR2200647	PRJEB23561	Cattle	Rumen	141463816	26489940802
ERR2200648	PRJEB23561	Cattle	Rumen	70572028	13540340428
ERR2200649	PRJEB23561	Cattle	Rumen	159468422	30621375539
ERR2200650	PRJEB23561	Cattle	Rumen	152945811	29084866889
ERR2200659	PRJEB23561	Cattle	Rumen	183209145	34748245443
ERR2200660	PRJEB23561	Cattle	Rumen	175001385	32816821514
ERR2200661	PRJEB23561	Cattle	Rumen	72038594	13227699895
ERR2200662	PRJEB23561	Cattle	Rumen	155590982	28826573811
ERR2200663	PRJEB23561	Cattle	Rumen	197568263	37276716647
ERR2200664	PRJEB23561	Cattle	Rumen	196520924	37058432983
ERR2200665	PRJEB23561	Cattle	Rumen	145623887	27570964745
ERR2200666	PRJEB23561	Cattle	Rumen	36368048	6947512905
ERR2200667	PRJEB23561	Cattle	Rumen	51561016	9879896742
ERR2200668	PRJEB23561	Cattle	Rumen	320327380	29951496946
ERR2200669	PRJEB23561	Cattle	Rumen	175310598	33132910668
ERR2200670	PRJEB23561	Cattle	Rumen	168721095	31914465464
ERR2200671	PRJEB23561	Cattle	Rumen	26537643	5005893469
ERR2200672	PRJEB23561	Cattle	Rumen	32328774	6118790630
ERR2200673	PRJEB23561	Cattle	Rumen	163109648	30657516096
ERR2200674	PRJEB23561	Cattle	Rumen	171567332	32235464137
ERR2200675	PRJEB23561	Cattle	Rumen	67874301	12393122577
ERR2200676	PRJEB23561	Cattle	Rumen	131354465	24242663257
ERR3201375	PRJEB31266	Cattle	Rumen	22251059	6322831011
ERR3201376	PRJEB31266	Cattle	Rumen	25058126	7107173997
ERR3201377	PRJEB31266	Cattle	Rumen	22993672	6538155786
ERR3201378	PRJEB31266	Cattle	Rumen	32344210	9185126718
ERR3201379	PRJEB31266	Cattle	Rumen	31133898	8853196406
ERR3201380	PRJEB31266	Cattle	Rumen	38469952	10937078845
ERR3201381	PRJEB31266	Cattle	Rumen	27338472	7756352338
ERR3201382	PRJEB31266	Cattle	Rumen	33316393	9455633013
ERR3201383	PRJEB31266	Cattle	Rumen	22371340	6369676758
ERR3201384	PRJEB31266	Cattle	Rumen	24374003	6929031157
ERR3201385	PRJEB31266	Cattle	Rumen	19607364	5577248102
ERR3201386	PRJEB31266	Cattle	Rumen	31984992	9105806176
ERR3201387	PRJEB31266	Cattle	Rumen	23059748	6558072358
ERR3201388	PRJEB31266	Cattle	Rumen	17439425	4952495408
ERR3201389	PRJEB31266	Cattle	Rumen	30911003	8784574252
ERR3201390	PRJEB31266	Cattle	Rumen	28357094	7985596374
ERR3201391	PRJEB31266	Cattle	Rumen	23112421	6515877616
ERR3201392	PRJEB31266	Cattle	Rumen	23516611	6619596935
ERR3201393	PRJEB31266	Cattle	Rumen	29356321	8246921043
ERR3201394	PRJEB31266	Cattle	Rumen	28353392	7988795927
ERR3201395	PRJEB31266	Cattle	Rumen	21886122	6221839351
ERR3201396	PRJEB31266	Cattle	Rumen	20889976	5923169058
ERR3201397	PRJEB31266	Cattle	Rumen	23079492	6548532123
ERR3201398	PRJEB31266	Cattle	Rumen	29749471	8440115328
ERR3201399	PRJEB31266	Cattle	Rumen	28367299	8050866627
ERR3201400	PRJEB31266	Cattle	Rumen	43101757	12260001912
ERR3201401	PRJEB31266	Cattle	Rumen	35667749	10135361827
ERR3201402	PRJEB31266	Cattle	Rumen	44376953	12605967921
ERR3201403	PRJEB31266	Cattle	Rumen	32496342	9220662152
ERR3201404	PRJEB31266	Cattle	Rumen	26083871	7397269822
ERR3201405	PRJEB31266	Cattle	Rumen	36707625	10408420096
ERR3201406	PRJEB31266	Cattle	Rumen	29353567	8334497587
ERR3201407	PRJEB31266	Cattle	Rumen	43495566	12339108483
ERR3201408	PRJEB31266	Cattle	Rumen	46983224	13329266537
ERR3201409	PRJEB31266	Cattle	Rumen	32907628	9341661373
ERR3201410	PRJEB31266	Cattle	Rumen	36048744	10228184064
ERR3201411	PRJEB31266	Cattle	Rumen	28405603	8061535143
ERR3201412	PRJEB31266	Cattle	Rumen	25952985	7356758753
ERR3201413	PRJEB31266	Cattle	Rumen	24920376	7060881058
ERR3201414	PRJEB31266	Cattle	Rumen	26157020	7403485769
ERR3201415	PRJEB31266	Cattle	Rumen	35240103	9989671178
ERR3201416	PRJEB31266	Cattle	Rumen	39769886	11281456502
ERR3201417	PRJEB31266	Cattle	Rumen	45509823	12920972296
ERR3201418	PRJEB31266	Cattle	Rumen	44161605	12544716157
ERR3201419	PRJEB31266	Cattle	Rumen	35145200	10007048068
ERR3201420	PRJEB31266	Cattle	Rumen	24289862	6853356990
ERR3201421	PRJEB31266	Cattle	Rumen	19502991	5496610416
ERR3201422	PRJEB31266	Cattle	Rumen	18638190	5246920980
ERR3211439	PRJEB31266	Cattle	Rumen	60775596	17808780805
ERR3211440	PRJEB31266	Cattle	Rumen	56254362	16488006646
ERR3211441	PRJEB31266	Cattle	Rumen	64820580	18997689826
ERR3211442	PRJEB31266	Cattle	Rumen	72723173	21350567333
ERR3211443	PRJEB31266	Cattle	Rumen	60011109	17527880253
ERR3211444	PRJEB31266	Cattle	Rumen	60585691	17767198176
ERR3211445	PRJEB31266	Cattle	Rumen	66628846	19532857741
ERR3211446	PRJEB31266	Cattle	Rumen	65678343	19250809904
ERR3211447	PRJEB31266	Cattle	Rumen	74558103	21678365064
ERR3211448	PRJEB31266	Cattle	Rumen	27045927	7784097875
ERR3211449	PRJEB31266	Cattle	Rumen	53031353	15415009340
ERR3211450	PRJEB31266	Cattle	Rumen	33590239	9711629185
ERR3211451	PRJEB31266	Cattle	Rumen	35335781	10216372516
ERR3211452	PRJEB31266	Cattle	Rumen	51153489	14859134964
ERR3211453	PRJEB31266	Cattle	Rumen	50520094	14663822092
ERR3211454	PRJEB31266	Cattle	Rumen	35716354	10353614333
ERR3211455	PRJEB31266	Cattle	Rumen	96577205	28485680964
ERR3211456	PRJEB31266	Cattle	Rumen	87384752	25743583070
ERR3211457	PRJEB31266	Cattle	Rumen	38307952	11249630350
ERR3211458	PRJEB31266	Cattle	Rumen	60688157	17809595370
ERR3211459	PRJEB31266	Cattle	Rumen	40838765	11912822181
ERR3211460	PRJEB31266	Cattle	Rumen	54019238	15766792515
ERR3211461	PRJEB31266	Cattle	Rumen	80177619	23598744296
ERR3211462	PRJEB31266	Cattle	Rumen	69129565	20311060377
ERR3211463	PRJEB31266	Cattle	Rumen	50089771	14678056316
ERR3211464	PRJEB31266	Cattle	Rumen	36142234	10495409385
ERR3211465	PRJEB31266	Cattle	Rumen	24263645	7043247139
ERR3211466	PRJEB31266	Cattle	Rumen	16273484	4710484260
ERR3211467	PRJEB31266	Cattle	Rumen	27640766	8047323383
ERR3211468	PRJEB31266	Cattle	Rumen	22568596	6533405154
ERR3211469	PRJEB31266	Cattle	Rumen	16724237	4835467448
ERR3211470	PRJEB31266	Cattle	Rumen	26161136	7614023225
ERR3211471	PRJEB31266	Cattle	Rumen	27944681	8107830792
ERR3211472	PRJEB31266	Cattle	Rumen	20890250	6035801109
ERR3211473	PRJEB31266	Cattle	Rumen	23188057	6715542725
ERR3211474	PRJEB31266	Cattle	Rumen	22323166	6411926430
ERR3211475	PRJEB31266	Cattle	Rumen	16909735	4907236389
ERR3211476	PRJEB31266	Cattle	Rumen	23896403	6903753893
ERR3211477	PRJEB31266	Cattle	Rumen	20908036	6012868785
ERR3211478	PRJEB31266	Cattle	Rumen	20820373	6047532981
ERR3211479	PRJEB31266	Cattle	Rumen	22521497	6510011573
ERR3211480	PRJEB31266	Cattle	Rumen	26418383	7643810489
ERR3211481	PRJEB31266	Cattle	Rumen	25110090	7279841909
ERR3211482	PRJEB31266	Cattle	Rumen	20816283	6062490638
ERR3211483	PRJEB31266	Cattle	Rumen	26556931	7692952463
ERR3211484	PRJEB31266	Cattle	Rumen	28751238	8302841672
ERR3211485	PRJEB31266	Cattle	Rumen	24944700	7264253529
ERR3211486	PRJEB31266	Cattle	Rumen	26803094	7814009979
ERR3220178	PRJEB31266	Cattle	Rumen	43318874	12596359494
ERR3220179	PRJEB31266	Cattle	Rumen	52955572	15377178305
ERR3220180	PRJEB31266	Cattle	Rumen	48883122	14188729029
ERR3220181	PRJEB31266	Cattle	Rumen	47963013	13930917414
ERR3220182	PRJEB31266	Cattle	Rumen	52139243	15161837548
ERR3220183	PRJEB31266	Cattle	Rumen	47286449	13748452891
ERR3220184	PRJEB31266	Cattle	Rumen	45781656	13299200677
ERR3220185	PRJEB31266	Cattle	Rumen	50057268	14541123363
ERR3220186	PRJEB31266	Cattle	Rumen	53908164	15730847996
ERR3220187	PRJEB31266	Cattle	Rumen	55897269	16280488622
ERR3220188	PRJEB31266	Cattle	Rumen	58242145	16962303065
ERR3220189	PRJEB31266	Cattle	Rumen	69235849	20186452976
ERR3220190	PRJEB31266	Cattle	Rumen	55622189	16207681137
ERR3220191	PRJEB31266	Cattle	Rumen	63541193	18547132510
ERR3220192	PRJEB31266	Cattle	Rumen	45356917	13205340117
ERR3220193	PRJEB31266	Cattle	Rumen	46220974	13462702466
ERR3220194	PRJEB31266	Cattle	Rumen	61035470	17886048486
ERR3220195	PRJEB31266	Cattle	Rumen	61205802	17921708227
ERR3220196	PRJEB31266	Cattle	Rumen	66530522	19474430987
ERR3220197	PRJEB31266	Cattle	Rumen	60859244	17821614857
ERR3220198	PRJEB31266	Cattle	Rumen	55087001	16145798919
ERR3220199	PRJEB31266	Cattle	Rumen	52440066	15377967082
ERR3220200	PRJEB31266	Cattle	Rumen	54567751	15977573451
ERR3220201	PRJEB31266	Cattle	Rumen	57005012	16693120853
ERR3220202	PRJEB31266	Cattle	Rumen	53859884	15670059478
ERR3220203	PRJEB31266	Cattle	Rumen	42595811	12396926047
ERR3220204	PRJEB31266	Cattle	Rumen	40227639	11712144484
ERR3220205	PRJEB31266	Cattle	Rumen	45245382	13168833568
ERR3220206	PRJEB31266	Cattle	Rumen	46379093	13506988351
ERR3220207	PRJEB31266	Cattle	Rumen	43950733	12805046417
ERR3220208	PRJEB31266	Cattle	Rumen	41998684	12223946089
ERR3220209	PRJEB31266	Cattle	Rumen	45338050	13204571418
ERR3220210	PRJEB31266	Cattle	Rumen	44153775	12872795702
ERR3220211	PRJEB31266	Cattle	Rumen	39269953	11424119148
ERR3220212	PRJEB31266	Cattle	Rumen	38655745	11263395579
ERR3220213	PRJEB31266	Cattle	Rumen	40595670	11823490223
ERR3220214	PRJEB31266	Cattle	Rumen	45533664	13273490027
ERR3220215	PRJEB31266	Cattle	Rumen	46138275	13453801935
ERR3220216	PRJEB31266	Cattle	Rumen	42191483	12284765178
ERR3220217	PRJEB31266	Cattle	Rumen	45276453	13186451786
ERR3220218	PRJEB31266	Cattle	Rumen	44369353	13002365086
ERR3220219	PRJEB31266	Cattle	Rumen	45538691	13318221102
ERR3220220	PRJEB31266	Cattle	Rumen	45266925	13259693155
ERR3220221	PRJEB31266	Cattle	Rumen	46580342	13654907333
ERR3220222	PRJEB31266	Cattle	Rumen	49054229	14365799539
ERR3220223	PRJEB31266	Cattle	Rumen	46984650	13767324771
ERR3220224	PRJEB31266	Cattle	Rumen	46171117	13521220624
ERR3220225	PRJEB31266	Cattle	Rumen	45888329	13437656094
ERR3224567	PRJEB31266	Cattle	Rumen	65475898	19085953565
ERR3224568	PRJEB31266	Cattle	Rumen	74498021	21686480917
ERR3224569	PRJEB31266	Cattle	Rumen	75487651	21997492472
ERR3224570	PRJEB31266	Cattle	Rumen	66359572	19338123285
ERR3224571	PRJEB31266	Cattle	Rumen	60687871	17685897917
ERR3224572	PRJEB31266	Cattle	Rumen	77917898	22729090035
ERR3224573	PRJEB31266	Cattle	Rumen	64314106	18602631285
ERR3224574	PRJEB31266	Cattle	Rumen	69757977	20219250055
ERR3224575	PRJEB31266	Cattle	Rumen	68968003	20072731610
ERR3224576	PRJEB31266	Cattle	Rumen	84485566	24581968060
ERR3224577	PRJEB31266	Cattle	Rumen	65518377	19033786963
ERR3224578	PRJEB31266	Cattle	Rumen	68993699	20099557579
ERR3224579	PRJEB31266	Cattle	Rumen	70834248	20509140513
ERR3224580	PRJEB31266	Cattle	Rumen	83080127	24177271149
ERR3224581	PRJEB31266	Cattle	Rumen	83518958	24424914856
ERR3224582	PRJEB31266	Cattle	Rumen	78790719	23005285674
ERR3224583	PRJEB31266	Cattle	Rumen	77258291	22493238060
ERR3224584	PRJEB31266	Cattle	Rumen	86273395	25225064328
ERR3224585	PRJEB31266	Cattle	Rumen	95814304	27953831207
ERR3224586	PRJEB31266	Cattle	Rumen	76658844	22430681284
ERR3224587	PRJEB31266	Cattle	Rumen	72116351	21043374011
ERR3224588	PRJEB31266	Cattle	Rumen	90222545	26344885377
ERR3224589	PRJEB31266	Cattle	Rumen	75732739	22048774846
ERR3224590	PRJEB31266	Cattle	Rumen	73489254	21384243920
ERR3224591	PRJEB31266	Cattle	Rumen	73033794	21265092057
ERR3224592	PRJEB31266	Cattle	Rumen	89610871	26083448044
ERR3224593	PRJEB31266	Cattle	Rumen	68740756	20013110629
ERR3224594	PRJEB31266	Cattle	Rumen	82665118	24053589298
ERR3224595	PRJEB31266	Cattle	Rumen	67586979	19666065009
ERR3224596	PRJEB31266	Cattle	Rumen	83882183	24434844322
ERR3224597	PRJEB31266	Cattle	Rumen	86668672	25233391330
ERR3224598	PRJEB31266	Cattle	Rumen	78733458	22848729295
ERR3224599	PRJEB31266	Cattle	Rumen	77140019	22394762795
ERR3224600	PRJEB31266	Cattle	Rumen	75529714	21964234893
ERR3224601	PRJEB31266	Cattle	Rumen	70455910	20519493072
ERR3224602	PRJEB31266	Cattle	Rumen	78791191	22915760061
ERR3224603	PRJEB31266	Cattle	Rumen	64779150	18843987488
ERR3224604	PRJEB31266	Cattle	Rumen	59971378	17414587871
ERR3224605	PRJEB31266	Cattle	Rumen	77111413	22492559516
ERR3224606	PRJEB31266	Cattle	Rumen	69497274	20262392323
ERR3224607	PRJEB31266	Cattle	Rumen	76178057	22253494618
ERR3224608	PRJEB31266	Cattle	Rumen	82166566	24032528119
ERR3224609	PRJEB31266	Cattle	Rumen	92927747	27183178076
ERR3224610	PRJEB31266	Cattle	Rumen	89327175	26128472096
ERR3224611	PRJEB31266	Cattle	Rumen	93895695	27457632991
ERR3224612	PRJEB31266	Cattle	Rumen	61009482	17768778534
ERR3224613	PRJEB31266	Cattle	Rumen	65913518	19197547757
ERR3224614	PRJEB31266	Cattle	Rumen	81013974	23679518346
ERR3275091	PRJEB31266	Cattle	Rumen	79434191	22955055165
ERR3275092	PRJEB31266	Cattle	Rumen	73164193	21087459539
ERR3275093	PRJEB31266	Cattle	Rumen	69995420	20161484753
ERR3275094	PRJEB31266	Cattle	Rumen	77372106	22256437596
ERR3275095	PRJEB31266	Cattle	Rumen	77079415	22198678379
ERR3275096	PRJEB31266	Cattle	Rumen	78562051	22679898280
ERR3275097	PRJEB31266	Cattle	Rumen	70193804	20272570272
ERR3275098	PRJEB31266	Cattle	Rumen	78044505	22493816265
ERR3275099	PRJEB31266	Cattle	Rumen	77670003	22521140782
ERR3275100	PRJEB31266	Cattle	Rumen	75356330	21721001774
ERR3275101	PRJEB31266	Cattle	Rumen	73558880	21273126848
ERR3275102	PRJEB31266	Cattle	Rumen	77041747	22301357875
ERR3275103	PRJEB31266	Cattle	Rumen	79937248	23135676173
ERR3275104	PRJEB31266	Cattle	Rumen	86291899	24973032718
ERR3275105	PRJEB31266	Cattle	Rumen	77462395	22386304801
ERR3275106	PRJEB31266	Cattle	Rumen	88390858	25547864024
ERR3275107	PRJEB31266	Cattle	Rumen	91063293	26434590307
ERR3275108	PRJEB31266	Cattle	Rumen	93027985	26969245174
ERR3275109	PRJEB31266	Cattle	Rumen	85396272	24781631357
ERR3275110	PRJEB31266	Cattle	Rumen	95115012	27618928814
ERR3275111	PRJEB31266	Cattle	Rumen	94512140	27483243901
ERR3275112	PRJEB31266	Cattle	Rumen	92986905	27055028774
ERR3275113	PRJEB31266	Cattle	Rumen	86237183	25029358712
ERR3275114	PRJEB31266	Cattle	Rumen	90250455	26169154529
ERR3275115	PRJEB31266	Cattle	Rumen	80779587	23486797081
ERR3275116	PRJEB31266	Cattle	Rumen	79659355	23133804395
ERR3275117	PRJEB31266	Cattle	Rumen	84943050	24720883040
ERR3275118	PRJEB31266	Cattle	Rumen	87833797	25545647936
ERR3275119	PRJEB31266	Cattle	Rumen	85249766	24776094687
ERR3275120	PRJEB31266	Cattle	Rumen	84723725	24651945056
ERR3275121	PRJEB31266	Cattle	Rumen	84598982	24600583953
ERR3275122	PRJEB31266	Cattle	Rumen	86626890	25135219048
ERR3275123	PRJEB31266	Cattle	Rumen	77160065	22148350656
ERR3275124	PRJEB31266	Cattle	Rumen	72099625	20807088237
ERR3275125	PRJEB31266	Cattle	Rumen	77804254	22458469154
ERR3275126	PRJEB31266	Cattle	Rumen	82695703	23878578993
ERR3275127	PRJEB31266	Cattle	Rumen	80848017	23337893670
ERR3275128	PRJEB31266	Cattle	Rumen	83186974	24044127963
ERR3275129	PRJEB31266	Cattle	Rumen	76503121	22093975430
ERR3275130	PRJEB31266	Cattle	Rumen	77764641	22446265174
ERR3275131	PRJEB31266	Cattle	Rumen	71111283	20584664566
ERR3275132	PRJEB31266	Cattle	Rumen	69931582	20237556639
ERR3275133	PRJEB31266	Cattle	Rumen	71076319	20572652812
ERR3275134	PRJEB31266	Cattle	Rumen	82525704	23887813691
ERR3275135	PRJEB31266	Cattle	Rumen	86226885	25070117711
ERR3275136	PRJEB31266	Cattle	Rumen	82562898	23976395878
ERR3275137	PRJEB31266	Cattle	Rumen	77181162	22346772975
ERR3275138	PRJEB31266	Cattle	Rumen	73408466	21210752969
SRR5190213	PRJNA362629	Cattle	Ileum	1281164	245393904
SRR5190214	PRJNA362629	Cattle	Ileum	2018463	385381061
SRR5190215	PRJNA362629	Cattle	Ileum	1817554	347215446
SRR5190216	PRJNA362629	Cattle	Ileum	2443500	459851518
SRR5190217	PRJNA362629	Cattle	Ileum	812772	159806036
SRR5190218	PRJNA362629	Cattle	Ileum	223769	43941245
SRR5190219	PRJNA362629	Cattle	Ileum	2558383	500755372
SRR5190220	PRJNA362629	Cattle	Ileum	1868893	356343275
SRR5190221	PRJNA362629	Cattle	Ileum	2276529	439336943
SRR5190222	PRJNA362629	Cattle	Ileum	1931586	372914416
SRR5190223	PRJNA362629	Cattle	Ileum	22005069	4313646704
SRR5190224	PRJNA362629	Cattle	Ileum	22308016	4348362692
SRR5190225	PRJNA362629	Cattle	Ileum	4085849	800319201
SRR5190226	PRJNA362629	Cattle	Ileum	1555936	299771774
SRR5190227	PRJNA362629	Cattle	Ileum	22851194	4443180306
SRR5190228	PRJNA362629	Cattle	Ileum	1545203	290034500
SRR5190229	PRJNA362629	Cattle	Ileum	5874155	1126251543
SRR5190230	PRJNA362629	Cattle	Ileum	2616853	507484344
SRR5190231	PRJNA362629	Cattle	Jejunum	1752513	334095274
SRR5190232	PRJNA362629	Cattle	Jejunum	1412112	269377803
SRR5190233	PRJNA362629	Cattle	Jejunum	1401854	266784861
SRR5190234	PRJNA362629	Cattle	Jejunum	2061800	397219267
SRR5190235	PRJNA362629	Cattle	Jejunum	754324	147420855
SRR5190236	PRJNA362629	Cattle	Jejunum	229955	45051296
SRR5190237	PRJNA362629	Cattle	Jejunum	1854358	355534789
SRR5190238	PRJNA362629	Cattle	Jejunum	1420236	269292343
SRR5190239	PRJNA362629	Cattle	Jejunum	2165093	418139076
SRR5190240	PRJNA362629	Cattle	Jejunum	5630990	1098092923
SRR5190241	PRJNA362629	Cattle	Jejunum	2306024	445189290
SRR5190242	PRJNA362629	Cattle	Jejunum	1923898	371796789
SRR5190243	PRJNA362629	Cattle	Jejunum	964516	188572154
SRR5190244	PRJNA362629	Cattle	Jejunum	25941655	5105161084
SRR5190245	PRJNA362629	Cattle	Jejunum	4697690	911808544
SRR5190246	PRJNA362629	Cattle	Jejunum	957983	182041010
SRR5190247	PRJNA362629	Cattle	Jejunum	20835921	4081952777
SRR5190248	PRJNA362629	Cattle	Jejunum	13220907	2580275467
SRR5190249	PRJNA362629	Cattle	Jejunum	1920753	366156252
SRR5190250	PRJNA362629	Cattle	Jejunum	1139883	222421380
SRR5190251	PRJNA362629	Cattle	Jejunum	2522310	480131673
SRR5190252	PRJNA362629	Cattle	Jejunum	2484880	464216048
SRR5190253	PRJNA362629	Cattle	Jejunum	1578562	310691252
SRR5190254	PRJNA362629	Cattle	Jejunum	212126	41556543
SRR5190255	PRJNA362629	Cattle	Jejunum	1295959	244405440
SRR5190256	PRJNA362629	Cattle	Jejunum	2381253	453995296
SRR5190257	PRJNA362629	Cattle	Jejunum	11214405	2163912948
SRR5190258	PRJNA362629	Cattle	Jejunum	1271638	245825548
SRR5190259	PRJNA362629	Cattle	Jejunum	3527697	686637051
SRR5190260	PRJNA362629	Cattle	Jejunum	4986948	960920186
SRR5190261	PRJNA362629	Cattle	Jejunum	1764857	345000905
SRR5190262	PRJNA362629	Cattle	Jejunum	5851273	1149860436
SRR5190263	PRJNA362629	Cattle	Jejunum	2143876	414806615
SRR5190264	PRJNA362629	Cattle	Jejunum	4172863	807650289
SRR5190265	PRJNA362629	Cattle	Jejunum	2337194	454058157
SRR5190266	PRJNA362629	Cattle	Jejunum	2052343	397183372
SRR5190267	PRJNA362629	Cattle	Rumen	1923141	368316955
SRR5190268	PRJNA362629	Cattle	Rumen	2253062	429668965
SRR5190269	PRJNA362629	Cattle	Rumen	2149087	408341830
SRR5190270	PRJNA362629	Cattle	Rumen	30653770	5943416117
SRR5190271	PRJNA362629	Cattle	Rumen	1151133	226685744
SRR5190272	PRJNA362629	Cattle	Rumen	9986791	1966407435
SRR5190273	PRJNA362629	Cattle	Rumen	20570487	3989958062
SRR5190274	PRJNA362629	Cattle	Rumen	27441013	5319042053
SRR5190275	PRJNA362629	Cattle	Rumen	18277731	3522740460
SRR5190276	PRJNA362629	Cattle	Rumen	15714746	3068560605
SRR5190277	PRJNA362629	Cattle	Rumen	19197658	3743984275
SRR5190278	PRJNA362629	Cattle	Rumen	25140858	4916345567
SRR5190279	PRJNA362629	Cattle	Rumen	19553153	3845075692
SRR5190280	PRJNA362629	Cattle	Rumen	17116157	3365581137
SRR5190281	PRJNA362629	Cattle	Rumen	18913271	3675913009
SRR5190282	PRJNA362629	Cattle	Rumen	17867070	3480609896
SRR5190283	PRJNA362629	Cattle	Rumen	21265708	4098085294
SRR5190284	PRJNA362629	Cattle	Rumen	14130923	2754732954
SRR6958874	PRJNA419351	Cattle	Rectum	22078524	5550208508
SRR6958875	PRJNA419351	Cattle	Rectum	18537132	4655272421
SRR6958876	PRJNA419351	Cattle	Rectum	25386947	6374028398
SRR6958877	PRJNA419351	Cattle	Rectum	29037071	7210243933
SRR6958878	PRJNA419351	Cattle	Rectum	26084312	6464099658
SRR6958879	PRJNA419351	Cattle	Rectum	28079788	7053929029
SRR6958880	PRJNA419351	Cattle	Rectum	29829052	7492726741
SRR6958881	PRJNA419351	Cattle	Rectum	28963547	7274068152
SRR6958882	PRJNA419351	Cattle	Rectum	21847561	5486869064
SRR6958883	PRJNA419351	Cattle	Rectum	22776106	5721641753
SRR6958884	PRJNA419351	Cattle	Rectum	22132112	5564572259
SRR6958885	PRJNA419351	Cattle	Rectum	22952158	5764990660
SRR6958886	PRJNA419351	Cattle	Rectum	24153959	6065349402
SRR6958887	PRJNA419351	Cattle	Rectum	30416637	7533677794
SRR6958888	PRJNA419351	Cattle	Rectum	11322089	2847386065
SRR6958889	PRJNA419351	Cattle	Rectum	12778324	3213105025
SRR6958890	PRJNA419351	Cattle	Rectum	9752977	2452071757
SRR6958891	PRJNA419351	Cattle	Rectum	12778266	3213732431
SRR6958892	PRJNA419351	Cattle	Rectum	17015498	4242104891
SRR6958893	PRJNA419351	Cattle	Rectum	15176535	3799124044
SRR6958894	PRJNA419351	Cattle	Rectum	14595513	3666750272
SRR6958895	PRJNA419351	Cattle	Rectum	12405285	3108968234
SRR6958896	PRJNA419351	Cattle	Rectum	22672787	5690152982
SRR6958897	PRJNA419351	Cattle	Rectum	6870875	1725918710
SRR6958898	PRJNA419351	Cattle	Rectum	21082056	5299272512
SRR6958899	PRJNA419351	Cattle	Rectum	20426010	5129703286
SRR6958900	PRJNA419351	Cattle	Rectum	18995397	4772800246
SRR6958901	PRJNA419351	Cattle	Rectum	20226917	5046889829
SRR6958902	PRJNA419351	Cattle	Rectum	23422859	5882459668
SRR6958903	PRJNA419351	Cattle	Rectum	21548870	5414227756
SRR6958904	PRJNA419351	Cattle	Rectum	20081150	5043697944
SRR6958905	PRJNA419351	Cattle	Rectum	18426909	4631316097
SRR8397881	PRJNA448333	Cattle	Rumen	27258688	5361137145
SRR8397882	PRJNA448333	Cattle	Rumen	31821034	6259420654
SRR8397883	PRJNA448333	Cattle	Rumen	28709507	5686052472
SRR8397884	PRJNA448333	Cattle	Rumen	33573858	6654328528
SRR8397885	PRJNA448333	Cattle	Rumen	32872191	6510332158
SRR8397886	PRJNA448333	Cattle	Rumen	26664439	5279841902
SRR8397887	PRJNA448333	Cattle	Rumen	34923642	6923034064
SRR8397888	PRJNA448333	Cattle	Rumen	29468997	5831871067
SRR8397889	PRJNA448333	Cattle	Rumen	25755207	5057555449
SRR8397890	PRJNA448333	Cattle	Rumen	30987641	6134773926
SRR8397891	PRJNA448333	Cattle	Rumen	21147453	4193670246
SRR8397892	PRJNA448333	Cattle	Rumen	29029326	5744983389
SRR8397893	PRJNA448333	Cattle	Rumen	20706219	4099475841
SRR8397894	PRJNA448333	Cattle	Rumen	24218561	4780204481
SRR8397895	PRJNA448333	Cattle	Rumen	26442422	5220587209
SRR8397896	PRJNA448333	Cattle	Rumen	23349269	4598891879
SRR8397897	PRJNA448333	Cattle	Rumen	18593292	3665568834
SRR8397898	PRJNA448333	Cattle	Rumen	26079579	5144616109
SRR8397899	PRJNA448333	Cattle	Rumen	35178427	6943554369
SRR8397900	PRJNA448333	Cattle	Rumen	27121078	5349758581
SRR8397901	PRJNA448333	Cattle	Rumen	24823907	4922507929
SRR8397902	PRJNA448333	Cattle	Rumen	32129726	6368787338
SRR8397903	PRJNA448333	Cattle	Rumen	28917782	5706817566
SRR8397904	PRJNA448333	Cattle	Rumen	35736100	7051612511
SRR8397905	PRJNA448333	Cattle	Rumen	32200998	6351185840
SRR8397906	PRJNA448333	Cattle	Rumen	38255876	7546422412
SRR8397907	PRJNA448333	Cattle	Rumen	25851897	5125469926
SRR8397908	PRJNA448333	Cattle	Rumen	25251902	5005930535
SRR8397909	PRJNA448333	Cattle	Rumen	29108796	5772872640
SRR8397910	PRJNA448333	Cattle	Rumen	39079560	7715699922
SRR8397911	PRJNA448333	Cattle	Rumen	27174237	5340850328
SRR8397912	PRJNA448333	Cattle	Rumen	29462971	5826871274
SRR8397913	PRJNA448333	Cattle	Rumen	26377143	5184662357
SRR8397914	PRJNA448333	Cattle	Rumen	31062158	6092780603
SRR8397915	PRJNA448333	Cattle	Rumen	29074296	5704618668
SRR8397916	PRJNA448333	Cattle	Rumen	24528528	4822185109
SRR8397917	PRJNA448333	Cattle	Rumen	30220752	5936024966
SRR8397918	PRJNA448333	Cattle	Rumen	31217976	6138813246
SRR8397919	PRJNA448333	Cattle	Rumen	25415637	4992429862
SRR8397920	PRJNA448333	Cattle	Rumen	26280008	5158537254
SRR8397921	PRJNA448333	Cattle	Rumen	20461296	4048663163
SRR8397922	PRJNA448333	Cattle	Rumen	20446494	4046113778
SRR8397923	PRJNA448333	Cattle	Rumen	32571927	6441133971
SRR8397924	PRJNA448333	Cattle	Rumen	34082470	6750091966
SRR8397925	PRJNA448333	Cattle	Rumen	32183271	6391231234
SRR8397926	PRJNA448333	Cattle	Rumen	32307438	6378191528
SRR8397927	PRJNA448333	Cattle	Rumen	16612131	3284424170
SRR8404214	PRJNA448333	Cattle	Rumen	36415686	7181852249
SRR12529040	PRJNA657455	Cattle	Cecum	53828239	16001027949
SRR12529051	PRJNA657455	Cattle	Cecum	67743719	20131990319
SRR12529062	PRJNA657455	Cattle	Cecum	73216588	21692914660
SRR12529073	PRJNA657455	Cattle	Cecum	50642255	14937180408
SRR12529074	PRJNA657455	Cattle	Rumen	165720626	49325763199
SRR12529075	PRJNA657455	Cattle	Rumen	170607321	50713087307
SRR12529076	PRJNA657455	Cattle	Rumen	167108468	49694819942
SRR12529077	PRJNA657455	Cattle	Rumen	170993153	50823918861
SRR12529078	PRJNA657455	Cattle	Rumen	167124634	49703813648
SRR12529079	PRJNA657455	Cattle	Rumen	183690752	54652279536
SRR12529080	PRJNA657455	Cattle	Reticulum	80336486	23697558852
SRR12529081	PRJNA657455	Cattle	Reticulum	77665009	22673277224
SRR12529082	PRJNA657455	Cattle	Reticulum	94258697	28064091864
SRR12529083	PRJNA657455	Cattle	Reticulum	69426879	20037450182
SRR12529084	PRJNA657455	Cattle	Abomasum	57695802	17109597802
SRR12529085	PRJNA657455	Cattle	Reticulum	64578759	19185654528
SRR12529086	PRJNA657455	Cattle	Reticulum	63672344	18909042485
SRR12529087	PRJNA657455	Cattle	Rectum	61525334	18168253729
SRR12529088	PRJNA657455	Cattle	Rectum	60970298	17986876675
SRR12529089	PRJNA657455	Cattle	Rectum	70129048	20756762757
SRR12529090	PRJNA657455	Cattle	Rectum	71367667	21163942603
SRR12529091	PRJNA657455	Cattle	Rectum	50948843	15023403471
SRR12529092	PRJNA657455	Cattle	Rectum	62357523	18408997868
SRR12529093	PRJNA657455	Cattle	Omasum	48290557	14360736237
SRR12529094	PRJNA657455	Cattle	Omasum	56892439	16792633099
SRR12529095	PRJNA657455	Cattle	Abomasum	52407890	15562738727
SRR12529096	PRJNA657455	Cattle	Omasum	69073414	20497121667
SRR12529097	PRJNA657455	Cattle	Omasum	47723901	14170473448
SRR12529098	PRJNA657455	Cattle	Omasum	61927783	18422841110
SRR12529109	PRJNA657455	Cattle	Omasum	72442890	21414844524
SRR12529120	PRJNA657455	Cattle	Jejunum	65385417	19380428751
SRR12529131	PRJNA657455	Cattle	Jejunum	28750605	8458554717
SRR12529142	PRJNA657455	Cattle	Jejunum	12407772	3460188039
SRR12529153	PRJNA657455	Cattle	Jejunum	27654497	7962480653
SRR12529164	PRJNA657455	Cattle	Jejunum	130774964	38750924242
SRR12529175	PRJNA657455	Cattle	Jejunum	58858922	17351441207
SRR12529176	PRJNA657455	Cattle	Abomasum	30440782	8996085649
SRR12529187	PRJNA657455	Cattle	Ileum	3382695	977529391
SRR12529198	PRJNA657455	Cattle	Ileum	34210159	9347263030
SRR12529209	PRJNA657455	Cattle	Ileum	16694895	4770125855
SRR12529220	PRJNA657455	Cattle	Ileum	25622716	7548535559
SRR12529231	PRJNA657455	Cattle	Ileum	40126357	10940265308
SRR12529242	PRJNA657455	Cattle	Ileum	17146098	5013092413
SRR12529253	PRJNA657455	Cattle	Duodenum	36208238	10583100200
SRR12529264	PRJNA657455	Cattle	Duodenum	82692150	24370318312
SRR12529275	PRJNA657455	Cattle	Duodenum	74341339	21938716701
SRR12529286	PRJNA657455	Cattle	Duodenum	102424323	29720916307
SRR12529287	PRJNA657455	Cattle	Abomasum	102941238	30547451013
SRR12529298	PRJNA657455	Cattle	Duodenum	76725290	22695773754
SRR12529309	PRJNA657455	Cattle	Duodenum	73431604	21693838879
SRR12529320	PRJNA657455	Cattle	Colon	55159012	16271030702
SRR12529331	PRJNA657455	Cattle	Colon	71955956	21277162557
SRR12529342	PRJNA657455	Cattle	Colon	96102276	28467565491
SRR12529353	PRJNA657455	Cattle	Colon	49398322	14594528554
SRR12529364	PRJNA657455	Cattle	Colon	65643954	19149910902
SRR12529375	PRJNA657455	Cattle	Colon	49348299	14633875785
SRR12529386	PRJNA657455	Cattle	Cecum	83194972	24706368756
SRR12529397	PRJNA657455	Cattle	Cecum	67789065	20144118810
SRR12529398	PRJNA657455	Cattle	Abomasum	75695820	22501811779
SRR12529399	PRJNA657455	Cattle	Abomasum	47470472	14057393204
ERR3525311	PRJEB34458	Cow	Rumen	73858099	14584322022
ERR3525312	PRJEB34458	Cow	Rumen	72904955	14392448269
ERR3525313	PRJEB34458	Cow	Rumen	82296391	16251956229
ERR3525314	PRJEB34458	Cow	Rumen	101840768	17323863013
ERR833046	PRJEB8939	Cow	Rumen	12270762	3235071507
ERR833047	PRJEB8939	Cow	Rumen	5470939	1565175561
ERR833048	PRJEB8939	Cow	Rumen	5573767	1547943577
ERR833049	PRJEB8939	Cow	Rumen	4456319	1268356379
ERR833050	PRJEB8939	Cow	Rumen	5690910	1617846972
ERR833051	PRJEB8939	Cow	Rumen	7335368	2128794945
ERR833052	PRJEB8939	Cow	Rumen	8713820	2574548110
ERR833211	PRJEB8939	Cow	Rumen	6630773	1892607204
ERR833212	PRJEB8939	Cow	Rumen	6027286	1731050528
ERR833213	PRJEB8939	Cow	Rumen	5964954	1702663173
ERR833214	PRJEB8939	Cow	Rumen	6605985	1911734825
ERR833215	PRJEB8939	Cow	Rumen	6646026	1931251761
ERR833216	PRJEB8939	Cow	Rumen	6581711	1900023667
ERR833217	PRJEB8939	Cow	Rumen	6168620	1777660310
SRR7686592	PRJNA485488	Cow	Rectum	6584831	1939213955
SRR7686593	PRJNA485488	Cow	Rectum	16983838	5012100251
SRR7686594	PRJNA485488	Cow	Rectum	2999302	866976604
SRR7686595	PRJNA485488	Cow	Rectum	5674042	1633410318
SRR7686596	PRJNA485488	Cow	Rectum	8049647	2314254579
SRR7686597	PRJNA485488	Cow	Rectum	29743792	8732112042
SRR7686598	PRJNA485488	Cow	Rectum	7559860	2228357303
SRR7686599	PRJNA485488	Cow	Rectum	25899008	7622666330
SRR7686600	PRJNA485488	Cow	Rectum	27095768	7831253430
SRR7686601	PRJNA485488	Cow	Rectum	18841830	5538491387
SRR7686602	PRJNA485488	Cow	Rectum	5298208	1558587189
SRR7686603	PRJNA485488	Cow	Rectum	6601576	1907795309
SRR7686604	PRJNA485488	Cow	Rectum	21839579	6299103318
SRR7686605	PRJNA485488	Cow	Rectum	3084528	904801641
SRR094166	PRJNA60251	Cow	Rectum	9431676	2156766752
SRR094403	PRJNA60251	Cow	Rectum	9185469	2095041832
SRR094405	PRJNA60251	Cow	Rectum	9300637	2104207920
SRR094415	PRJNA60251	Cow	Rectum	10582869	2272756813
SRR094416	PRJNA60251	Cow	Rectum	9166534	2100636151
SRR094417	PRJNA60251	Cow	Rectum	9574282	2213222833
SRR094418	PRJNA60251	Cow	Rectum	9107566	2101814464
SRR094419	PRJNA60251	Cow	Rectum	0	0
SRR094424	PRJNA60251	Cow	Rectum	141979352	21088819977
SRR094427	PRJNA60251	Cow	Rectum	0	0
SRR094428	PRJNA60251	Cow	Rectum	132299804	19701533058
SRR094437	PRJNA60251	Cow	Rectum	363988527	67189444212
SRR094926	PRJNA60251	Cow	Rectum	420395399	78126827058
ERR1278072	PRJEB12797	Deer	Rumen	111966464	10522305012
ERR1278073	PRJEB12797	Deer	Rumen	21801162	4275776475
ERR1278074	PRJEB12797	Deer	Rumen	41542639	8000333828
ERR1278103	PRJEB12797	Deer	Rumen	65854023	12872951374
ERR1278104	PRJEB12797	Deer	Rumen	113996074	22377333962
ERR1278105	PRJEB12797	Deer	Rumen	82865597	15990626551
ERR3525315	PRJEB34458	Deer	Rumen	90094580	25231679635
ERR3525316	PRJEB34458	Deer	Rumen	73231196	20331504658
ERR3525317	PRJEB34458	Deer	Rumen	75078333	20345699824
ERR3525318	PRJEB34458	Deer	Rumen	58028523	15849372358
ERR3525319	PRJEB34458	Deer	Rumen	58844719	15921351180
ERR3525320	PRJEB34458	Deer	Rumen	59440928	15809057117
SRR2959502	PRJNA301235	Deer	Rectum	140741060	27746160134
SRR2959740	PRJNA301235	Deer	Rectum	39005884	7674631682
SRR6122973	PRJNA301235	Deer	Rectum	42465494	8424722647
SRR12529154	PRJNA657455	Deer	Rumen	179169090	53215342581
SRR12529155	PRJNA657455	Deer	Rumen	173753777	51507766072
SRR12529156	PRJNA657455	Deer	Rumen	124160596	37024014241
SRR12529157	PRJNA657455	Deer	Rumen	199872995	59106029254
SRR12529158	PRJNA657455	Deer	Rumen	155031287	46255772597
SRR12529159	PRJNA657455	Deer	Reticulum	77534279	23010308602
SRR12529160	PRJNA657455	Deer	Reticulum	84790822	25168541052
SRR12529161	PRJNA657455	Deer	Reticulum	60376032	18010503347
SRR12529162	PRJNA657455	Deer	Reticulum	73167063	21673480633
SRR12529163	PRJNA657455	Deer	Reticulum	67764823	20018127288
SRR12529165	PRJNA657455	Deer	Rectum	83502055	24795670019
SRR12529166	PRJNA657455	Deer	Rectum	70053997	20819883029
SRR12529167	PRJNA657455	Deer	Rectum	77822125	23121309498
SRR12529168	PRJNA657455	Deer	Rectum	69431927	20564152722
SRR12529169	PRJNA657455	Deer	Rectum	60611966	17940560936
SRR12529170	PRJNA657455	Deer	Omasum	73377294	21828231627
SRR12529171	PRJNA657455	Deer	Omasum	79640008	23658260156
SRR12529172	PRJNA657455	Deer	Omasum	75924160	22502219963
SRR12529173	PRJNA657455	Deer	Omasum	78111412	23130334925
SRR12529174	PRJNA657455	Deer	Omasum	56130961	16628537176
SRR12529177	PRJNA657455	Deer	Jejunum	5825851	1689978581
SRR12529178	PRJNA657455	Deer	Jejunum	4227478	1220285087
SRR12529179	PRJNA657455	Deer	Jejunum	8200171	2384743380
SRR12529180	PRJNA657455	Deer	Jejunum	12188414	3568135540
SRR12529181	PRJNA657455	Deer	Jejunum	8223202	2400890989
SRR12529182	PRJNA657455	Deer	Ileum	553361	165322555
SRR12529183	PRJNA657455	Deer	Ileum	10937379	3176295486
SRR12529184	PRJNA657455	Deer	Ileum	15487482	4561692130
SRR12529185	PRJNA657455	Deer	Ileum	21822259	6353050466
SRR12529186	PRJNA657455	Deer	Ileum	5962184	1734851591
SRR12529188	PRJNA657455	Deer	Duodenum	5567168	1614460436
SRR12529189	PRJNA657455	Deer	Duodenum	7697620	2220751141
SRR12529190	PRJNA657455	Deer	Duodenum	7195369	2089195330
SRR12529191	PRJNA657455	Deer	Duodenum	5061683	1470673407
SRR12529192	PRJNA657455	Deer	Duodenum	3766988	1078763594
SRR12529193	PRJNA657455	Deer	Colon	62949136	18629144716
SRR12529194	PRJNA657455	Deer	Colon	76392502	22700268460
SRR12529195	PRJNA657455	Deer	Colon	53799696	15969426260
SRR12529196	PRJNA657455	Deer	Colon	64875156	19197963276
SRR12529197	PRJNA657455	Deer	Colon	18055831	5347283293
SRR12529199	PRJNA657455	Deer	Cecum	64746561	19165570141
SRR12529200	PRJNA657455	Deer	Cecum	61364758	18088943773
SRR12529201	PRJNA657455	Deer	Cecum	76332590	22680687080
SRR12529202	PRJNA657455	Deer	Cecum	70025145	20720192164
SRR12529203	PRJNA657455	Deer	Cecum	71435360	21149177931
SRR12529204	PRJNA657455	Deer	Abomasum	69868522	20768477768
SRR12529205	PRJNA657455	Deer	Abomasum	71064496	21264532569
SRR12529206	PRJNA657455	Deer	Abomasum	70486628	20944120283
SRR12529207	PRJNA657455	Deer	Abomasum	69587814	20638504899
SRR12529208	PRJNA657455	Deer	Abomasum	71497143	21184019931
SRR12529321	PRJNA657455	Deer	Rumen	192513889	56640725348
SRR12529322	PRJNA657455	Deer	Rumen	173662895	51147809900
SRR12529323	PRJNA657455	Deer	Rumen	167998859	49534345187
SRR12529324	PRJNA657455	Deer	Rumen	200872351	59524991579
SRR12529325	PRJNA657455	Deer	Rumen	174397761	51493729738
SRR12529326	PRJNA657455	Deer	Reticulum	65580490	19325331934
SRR12529327	PRJNA657455	Deer	Reticulum	76415835	22531398252
SRR12529328	PRJNA657455	Deer	Reticulum	76199455	22383925449
SRR12529329	PRJNA657455	Deer	Reticulum	72639698	21396007396
SRR12529330	PRJNA657455	Deer	Reticulum	72455820	21316609273
SRR12529332	PRJNA657455	Deer	Rectum	62711264	18469131187
SRR12529333	PRJNA657455	Deer	Rectum	81532707	23972869332
SRR12529334	PRJNA657455	Deer	Rectum	70134483	20573648504
SRR12529335	PRJNA657455	Deer	Rectum	74041653	21747098021
SRR12529336	PRJNA657455	Deer	Rectum	70889261	20878978887
SRR12529337	PRJNA657455	Deer	Omasum	67322725	19821494714
SRR12529338	PRJNA657455	Deer	Omasum	72452873	21325338275
SRR12529339	PRJNA657455	Deer	Omasum	68949076	20288161797
SRR12529340	PRJNA657455	Deer	Omasum	64679233	19025438351
SRR12529341	PRJNA657455	Deer	Omasum	63125071	18600285008
SRR12529343	PRJNA657455	Deer	Jejunum	23329786	6610619005
SRR12529344	PRJNA657455	Deer	Jejunum	23130662	6606518311
SRR12529345	PRJNA657455	Deer	Jejunum	41463799	11991441823
SRR12529346	PRJNA657455	Deer	Jejunum	59178211	17147648279
SRR12529347	PRJNA657455	Deer	Jejunum	79356943	22402260851
SRR12529348	PRJNA657455	Deer	Ileum	24287985	6976795557
SRR12529349	PRJNA657455	Deer	Ileum	23532307	6747319438
SRR12529350	PRJNA657455	Deer	Ileum	24540952	7057037025
SRR12529351	PRJNA657455	Deer	Ileum	24610805	7021119435
SRR12529352	PRJNA657455	Deer	Ileum	20477303	5873149493
SRR12529354	PRJNA657455	Deer	Duodenum	23973470	6801212540
SRR12529355	PRJNA657455	Deer	Duodenum	23128785	6615828710
SRR12529356	PRJNA657455	Deer	Duodenum	18807558	5368886450
SRR12529357	PRJNA657455	Deer	Duodenum	49396209	14459826490
SRR12529358	PRJNA657455	Deer	Duodenum	41786983	12198779890
SRR12529359	PRJNA657455	Deer	Colon	56839973	16570737116
SRR12529360	PRJNA657455	Deer	Colon	71183313	20881793534
SRR12529361	PRJNA657455	Deer	Colon	66031439	19351591224
SRR12529362	PRJNA657455	Deer	Colon	69257085	20265038219
SRR12529363	PRJNA657455	Deer	Colon	75856812	22049497107
SRR12529365	PRJNA657455	Deer	Cecum	75792649	22218807054
SRR12529366	PRJNA657455	Deer	Cecum	65167397	19066738484
SRR12529367	PRJNA657455	Deer	Cecum	67796826	19820826766
SRR12529368	PRJNA657455	Deer	Cecum	65236139	19155853551
SRR12529369	PRJNA657455	Deer	Cecum	68686523	20068803332
SRR12529370	PRJNA657455	Deer	Abomasum	34593513	10087850093
SRR12529371	PRJNA657455	Deer	Abomasum	64948028	19061145477
SRR12529372	PRJNA657455	Deer	Abomasum	46523843	13639412160
SRR12529373	PRJNA657455	Deer	Abomasum	39885148	11626968984
SRR12529374	PRJNA657455	Deer	Abomasum	64225085	18735238889
SRR7702748	PRJNA486341	Goat	Rectum	2641537	1300349470
SRR7702749	PRJNA486341	Goat	Small Intestine	1568972	767314864
SRR7702756	PRJNA486341	Goat	Large Intestine	1236925	627383030
SRR7702757	PRJNA486341	Goat	Large Intestine	1386623	706165564
SRR7702758	PRJNA486341	Goat	Rectum	1278438	646931783
SRR7702759	PRJNA486341	Goat	Small Intestine	1222823	606764305
SRR12529030	PRJNA657455	Goat	Omasum	66646372	19638710145
SRR12529031	PRJNA657455	Goat	Omasum	48857719	14368908314
SRR12529032	PRJNA657455	Goat	Omasum	62996343	18544848960
SRR12529033	PRJNA657455	Goat	Omasum	55286769	16285591501
SRR12529034	PRJNA657455	Goat	Jejunum	35731419	10138432432
SRR12529035	PRJNA657455	Goat	Jejunum	44934545	13068726373
SRR12529036	PRJNA657455	Goat	Jejunum	50397992	14618630211
SRR12529037	PRJNA657455	Goat	Jejunum	62415604	18347700772
SRR12529038	PRJNA657455	Goat	Jejunum	44372910	12481678829
SRR12529039	PRJNA657455	Goat	Jejunum	46136336	13439207123
SRR12529041	PRJNA657455	Goat	Ileum	50242019	14616338084
SRR12529042	PRJNA657455	Goat	Ileum	21074949	6185087068
SRR12529043	PRJNA657455	Goat	Ileum	46913972	13709312806
SRR12529044	PRJNA657455	Goat	Ileum	51572869	14794723653
SRR12529045	PRJNA657455	Goat	Ileum	56082857	16264825374
SRR12529046	PRJNA657455	Goat	Ileum	60094598	16962449441
SRR12529047	PRJNA657455	Goat	Duodenum	50342094	14795024064
SRR12529048	PRJNA657455	Goat	Duodenum	39851100	11698735292
SRR12529049	PRJNA657455	Goat	Duodenum	9529042	2697383526
SRR12529050	PRJNA657455	Goat	Duodenum	65477933	19270934737
SRR12529052	PRJNA657455	Goat	Duodenum	55491114	15734141874
SRR12529053	PRJNA657455	Goat	Duodenum	64074159	18792063623
SRR12529054	PRJNA657455	Goat	Colon	69590495	20537557809
SRR12529055	PRJNA657455	Goat	Colon	33811062	9949300783
SRR12529056	PRJNA657455	Goat	Colon	48259458	14196375360
SRR12529057	PRJNA657455	Goat	Colon	50050544	14722791598
SRR12529058	PRJNA657455	Goat	Colon	65330928	19277148646
SRR12529059	PRJNA657455	Goat	Colon	70862644	20871152558
SRR12529060	PRJNA657455	Goat	Cecum	64443781	19043525999
SRR12529061	PRJNA657455	Goat	Cecum	73839515	21729576604
SRR12529063	PRJNA657455	Goat	Cecum	75807876	22298735957
SRR12529064	PRJNA657455	Goat	Cecum	70629345	20786518861
SRR12529065	PRJNA657455	Goat	Cecum	69226045	20407002037
SRR12529066	PRJNA657455	Goat	Cecum	62269307	18332328812
SRR12529067	PRJNA657455	Goat	Abomasum	67257691	19818464281
SRR12529068	PRJNA657455	Goat	Abomasum	68410228	20152951260
SRR12529069	PRJNA657455	Goat	Abomasum	42848974	12530426728
SRR12529070	PRJNA657455	Goat	Abomasum	60392342	17788668184
SRR12529071	PRJNA657455	Goat	Abomasum	65512601	19290892041
SRR12529072	PRJNA657455	Goat	Abomasum	70914186	20892931139
SRR12529376	PRJNA657455	Goat	Rumen	168411266	49630832213
SRR12529377	PRJNA657455	Goat	Rumen	178175662	52290978722
SRR12529378	PRJNA657455	Goat	Rumen	175203655	51605702986
SRR12529379	PRJNA657455	Goat	Rumen	186182826	54959010850
SRR12529380	PRJNA657455	Goat	Rumen	177511467	52150026963
SRR12529381	PRJNA657455	Goat	Rumen	166255015	48888357407
SRR12529382	PRJNA657455	Goat	Reticulum	65370734	19269918279
SRR12529383	PRJNA657455	Goat	Reticulum	72946771	21453113075
SRR12529384	PRJNA657455	Goat	Reticulum	62960438	18521792174
SRR12529385	PRJNA657455	Goat	Reticulum	81720196	24149448551
SRR12529387	PRJNA657455	Goat	Reticulum	74667591	21982248765
SRR12529388	PRJNA657455	Goat	Reticulum	65913963	19415440558
SRR12529389	PRJNA657455	Goat	Rectum	68888961	20322404726
SRR12529390	PRJNA657455	Goat	Rectum	53980184	15886290966
SRR12529391	PRJNA657455	Goat	Rectum	61831375	18239722971
SRR12529392	PRJNA657455	Goat	Rectum	69318344	20398540617
SRR12529393	PRJNA657455	Goat	Rectum	45348268	13054036300
SRR12529394	PRJNA657455	Goat	Rectum	68127116	20083895860
SRR12529395	PRJNA657455	Goat	Omasum	78368929	23081792337
SRR12529396	PRJNA657455	Goat	Omasum	69569653	20484782407
AMSCB1-2	PRJNA723432	Goat	Omasum	23899605	7141956388
AMSCB2-1	PRJNA723432	Goat	Omasum	26436377	7901277745
AMSCB3-2	PRJNA723432	Goat	Omasum	25377389	7582311665
AMSCB4-1	PRJNA723432	Goat	Omasum	24537565	7327484341
AMSCB5-2	PRJNA723432	Goat	Omasum	24851412	7418085787
AMSCH3-1	PRJNA723432	Goat	Ileum	1504221	445999032
AMSCJ1-1	PRJNA723432	Goat	Colon	19534886	5835032857
AMSCJ2-2	PRJNA723432	Goat	Colon	22722599	6789371873
AMSCJ3-1	PRJNA723432	Goat	Colon	12616315	3768296080
AMSCJ5-2	PRJNA723432	Goat	Colon	11483349	3426981882
AMSCK2-1	PRJNA723432	Goat	Jejunum	752782	223840157
AMSCK3-1	PRJNA723432	Goat	Jejunum	997640	295962776
AMSCK4-1	PRJNA723432	Goat	Jejunum	1320419	391669486
AMSCL1-1	PRJNA723432	Goat	Rumen	22953832	6859040979
AMSCL2-1	PRJNA723432	Goat	Rumen	22298629	6662320339
AMSCL3-1	PRJNA723432	Goat	Rumen	27507137	8217188014
AMSCL4-1	PRJNA723432	Goat	Rumen	24811731	7406999505
AMSCL5-2	PRJNA723432	Goat	Rumen	25750446	7686237703
AMSCO1-1	PRJNA723432	Goat	Cecum	13468287	4021767227
AMSCO2-2	PRJNA723432	Goat	Cecum	20976189	6264316870
AMSCO3-1	PRJNA723432	Goat	Cecum	18282641	5457281685
AMSCO4-1	PRJNA723432	Goat	Cecum	16487815	4925474728
AMSCO5-2	PRJNA723432	Goat	Cecum	15624081	4666048541
AMSCS5-1	PRJNA723432	Goat	Duodenum	15378564	4592614892
AMSCS5-2	PRJNA723432	Goat	Duodenum	16300431	4865629937
AMSCW1-1	PRJNA723432	Goat	Reticulum	27725516	8280802178
AMSCW2-1	PRJNA723432	Goat	Reticulum	25284343	7551025097
AMSCW3-1	PRJNA723432	Goat	Reticulum	24468228	7311804792
AMSCW4-1	PRJNA723432	Goat	Reticulum	23331093	6966548465
AMSCW5-2	PRJNA723432	Goat	Reticulum	27479926	8212713230
AMSCZ2-1	PRJNA723432	Goat	Abomasum	5984585	1783984400
AMSCZ3-1	PRJNA723432	Goat	Abomasum	7739663	2310237288
AMSCZ5-2	PRJNA723432	Goat	Abomasum	13384397	3994675657
AMSFB10-1	PRJNA723432	Goat	Omasum	21669143	6470758567
AMSFB11-1	PRJNA723432	Goat	Omasum	19942874	5962993314
AMSFB12-1	PRJNA723432	Goat	Omasum	21283808	6367008256
AMSFB13-2	PRJNA723432	Goat	Omasum	23140987	6914188024
AMSFB14-1	PRJNA723432	Goat	Omasum	21180715	6325518515
AMSFB2-1	PRJNA723432	Goat	Omasum	20584279	6146911484
AMSFB3-1	PRJNA723432	Goat	Omasum	23035262	6886465780
AMSFB4-1	PRJNA723432	Goat	Omasum	25978658	7754121268
AMSFB5-1	PRJNA723432	Goat	Omasum	21310613	6366307486
AMSFB6-1	PRJNA723432	Goat	Omasum	19270558	5756725835
AMSFB8-1	PRJNA723432	Goat	Omasum	20274523	6063653721
AMSFB9-2	PRJNA723432	Goat	Omasum	25048181	7481401596
AMSFH11-1	PRJNA723432	Goat	Ileum	1537506	457549888
AMSFH12-2	PRJNA723432	Goat	Ileum	3256103	971347631
AMSFH13-1	PRJNA723432	Goat	Ileum	1151313	342741312
AMSFH3-2	PRJNA723432	Goat	Ileum	1086245	323381886
AMSFH4-1	PRJNA723432	Goat	Ileum	26829918	8005742862
AMSFH5-1	PRJNA723432	Goat	Ileum	744895	219737933
AMSFH6-1	PRJNA723432	Goat	Ileum	5248066	1565692268
AMSFH8-1	PRJNA723432	Goat	Ileum	6633623	1982401398
AMSFH9-1	PRJNA723432	Goat	Ileum	645573	191774109
AMSFJ10-1	PRJNA723432	Goat	Colon	17134606	5118512207
AMSFJ11-1	PRJNA723432	Goat	Colon	7519696	2248612196
AMSFJ12-1	PRJNA723432	Goat	Colon	8063792	2409570252
AMSFJ13-2	PRJNA723432	Goat	Colon	24092805	7194922734
AMSFJ14-1	PRJNA723432	Goat	Colon	17049474	5093898641
AMSFJ2-2	PRJNA723432	Goat	Colon	7914862	2362445934
AMSFJ3-1	PRJNA723432	Goat	Colon	14972857	4474171436
AMSFJ4-1	PRJNA723432	Goat	Colon	23792800	7098738351
AMSFJ5-1	PRJNA723432	Goat	Colon	13369000	3994091766
AMSFJ6-1	PRJNA723432	Goat	Colon	13070486	3904019078
AMSFJ8-1	PRJNA723432	Goat	Colon	11922437	3565296397
AMSFJ9-2	PRJNA723432	Goat	Colon	18349759	5482172536
AMSFK11-1	PRJNA723432	Goat	Jejunum	2566411	765600199
AMSFK12-1	PRJNA723432	Goat	Jejunum	1011238	298835724
AMSFK13-2	PRJNA723432	Goat	Jejunum	1588188	473300249
AMSFK3-2	PRJNA723432	Goat	Jejunum	1209851	359986320
AMSFK4-2	PRJNA723432	Goat	Jejunum	27340831	8166070348
AMSFK7-2	PRJNA723432	Goat	Jejunum	1407203	419668701
AMSFK8-1	PRJNA723432	Goat	Jejunum	2153509	643883274
AMSFL10-1	PRJNA723432	Goat	Rumen	20329315	6073660994
AMSFL11-1	PRJNA723432	Goat	Rumen	21080253	6306314724
AMSFL12-1	PRJNA723432	Goat	Rumen	24890563	7448552865
AMSFL13-2	PRJNA723432	Goat	Rumen	23222978	6938178309
AMSFL14-1	PRJNA723432	Goat	Rumen	25206056	7529987468
AMSFL2-1	PRJNA723432	Goat	Rumen	24948267	7440092426
AMSFL3-1	PRJNA723432	Goat	Rumen	23329030	6971791720
AMSFL4-1	PRJNA723432	Goat	Rumen	24939867	7444701700
AMSFL5-1	PRJNA723432	Goat	Rumen	24851891	7426954003
AMSFL6-1	PRJNA723432	Goat	Rumen	20097081	6005705521
AMSFL8-1	PRJNA723432	Goat	Rumen	20371468	6095926718
AMSFL9-2	PRJNA723432	Goat	Rumen	20369187	6085754638
AMSFO10-1	PRJNA723432	Goat	Cecum	16139128	4823205062
AMSFO11-1	PRJNA723432	Goat	Cecum	20754965	6209790259
AMSFO12-1	PRJNA723432	Goat	Cecum	11026278	3296973120
AMSFO13-2	PRJNA723432	Goat	Cecum	24319820	7267244383
AMSFO14-1	PRJNA723432	Goat	Cecum	18619820	5563201167
AMSFO3-2	PRJNA723432	Goat	Cecum	16400464	4900150024
AMSFO4-1	PRJNA723432	Goat	Cecum	28834948	8609738359
AMSFO5-1	PRJNA723432	Goat	Cecum	19652805	5871833882
AMSFO6-1	PRJNA723432	Goat	Cecum	20222174	6041720811
AMSFO8-1	PRJNA723432	Goat	Cecum	18520792	5541090685
AMSFO9-2	PRJNA723432	Goat	Cecum	14150403	4228121640
AMSFS10-1	PRJNA723432	Goat	Duodenum	20322209	6073336292
AMSFS11-1	PRJNA723432	Goat	Duodenum	10765206	3220977960
AMSFS12-1	PRJNA723432	Goat	Duodenum	15170900	4538683443
AMSFS13-2	PRJNA723432	Goat	Duodenum	1097729	327407644
AMSFS14-1	PRJNA723432	Goat	Duodenum	22481525	6717413570
AMSFS4-1	PRJNA723432	Goat	Duodenum	18748377	5594979728
AMSFS5-1	PRJNA723432	Goat	Duodenum	18303016	5467686858
AMSFS6-1	PRJNA723432	Goat	Duodenum	3952327	1181165895
AMSFS7-2	PRJNA723432	Goat	Duodenum	3096246	925685108
AMSFS8-1	PRJNA723432	Goat	Duodenum	1480474	442489028
AMSFS9-2	PRJNA723432	Goat	Duodenum	14989225	4479326447
AMSFW10-1	PRJNA723432	Goat	Reticulum	25870698	7730998996
AMSFW11-1	PRJNA723432	Goat	Reticulum	27439570	8208835526
AMSFW12-1	PRJNA723432	Goat	Reticulum	20317735	6077171992
AMSFW13-2	PRJNA723432	Goat	Reticulum	23444095	7006367974
AMSFW14-1	PRJNA723432	Goat	Reticulum	24351546	7273677308
AMSFW2-1	PRJNA723432	Goat	Reticulum	21741765	6498267287
AMSFW3-2	PRJNA723432	Goat	Reticulum	22528367	6733728184
AMSFW4-1	PRJNA723432	Goat	Reticulum	23571785	7036170832
AMSFW5-1	PRJNA723432	Goat	Reticulum	20315012	6069245616
AMSFW6-1	PRJNA723432	Goat	Reticulum	21772511	6506484840
AMSFW8-1	PRJNA723432	Goat	Reticulum	22479541	6726535004
AMSFW9-2	PRJNA723432	Goat	Reticulum	23409111	6992314680
AMSFZ10-1	PRJNA723432	Goat	Abomasum	20676751	6175908352
AMSFZ11-1	PRJNA723432	Goat	Abomasum	23297574	6971736583
AMSFZ12-1	PRJNA723432	Goat	Abomasum	14539163	4349140008
AMSFZ14-1	PRJNA723432	Goat	Abomasum	27492595	8203037440
AMSFZ2-1	PRJNA723432	Goat	Abomasum	12716606	3799869374
AMSFZ3-1	PRJNA723432	Goat	Abomasum	2556744	762870672
AMSFZ4-1	PRJNA723432	Goat	Abomasum	26760374	7988509313
AMSFZ5-1	PRJNA723432	Goat	Abomasum	20365960	6086933028
AMSFZ6-1	PRJNA723432	Goat	Abomasum	20109340	6006819760
AMSFZ8-1	PRJNA723432	Goat	Abomasum	13268986	3970364567
AMSFZ9-2	PRJNA723432	Goat	Abomasum	15874938	4742972068
AWMGB10-1	PRJNA723432	Goat	Omasum	22044766	6585833341
AWMGB11-2	PRJNA723432	Goat	Omasum	22433871	6704048598
AWMGB1-2	PRJNA723432	Goat	Omasum	26072977	7778072401
AWMGB12-2	PRJNA723432	Goat	Omasum	23796771	7107420508
AWMGB13-2	PRJNA723432	Goat	Omasum	23826739	7128564724
AWMGB20-1	PRJNA723432	Goat	Omasum	26701751	7989588702
AWMGB2-1	PRJNA723432	Goat	Omasum	20670213	6183783219
AWMGB21-2	PRJNA723432	Goat	Omasum	26084142	7792355299
AWMGB3-1	PRJNA723432	Goat	Omasum	27417052	8202032084
AWMGB4-1	PRJNA723432	Goat	Omasum	20436202	6109288233
AWMGB5-1	PRJNA723432	Goat	Omasum	20163311	6028876916
AWMGB8-2	PRJNA723432	Goat	Omasum	23026189	6882858942
AWMGB9-1	PRJNA723432	Goat	Omasum	21473858	6424843198
AWMGH10-2	PRJNA723432	Goat	Ileum	735243	218835245
AWMGH11-2	PRJNA723432	Goat	Ileum	818402	243167019
AWMGH1-2	PRJNA723432	Goat	Ileum	785306	233449440
AWMGH13-2	PRJNA723432	Goat	Ileum	850110	253795677
AWMGH20-1	PRJNA723432	Goat	Ileum	17378917	5198452015
AWMGH2-1	PRJNA723432	Goat	Ileum	986451	293954459
AWMGH3-1	PRJNA723432	Goat	Ileum	2913568	867607554
AWMGH4-1	PRJNA723432	Goat	Ileum	678153	201935945
AWMGH7-2	PRJNA723432	Goat	Ileum	719301	214331919
AWMGH8-2	PRJNA723432	Goat	Ileum	696429	207376554
AWMGH9-2	PRJNA723432	Goat	Ileum	1287704	384015586
AWMGJ10-1	PRJNA723432	Goat	Colon	10951487	3272031191
AWMGJ1-1	PRJNA723432	Goat	Colon	17883179	5342317816
AWMGJ12-2	PRJNA723432	Goat	Colon	3871087	1156037085
AWMGJ13-2	PRJNA723432	Goat	Colon	6416998	1919392737
AWMGJ20-1	PRJNA723432	Goat	Colon	18710116	5595327375
AWMGJ2-1	PRJNA723432	Goat	Colon	2696378	805960017
AWMGJ21-2	PRJNA723432	Goat	Colon	6123588	1829147086
AWMGJ3-1	PRJNA723432	Goat	Colon	7134917	2134134871
AWMGJ4-1	PRJNA723432	Goat	Colon	5463067	1632214763
AWMGJ5-1	PRJNA723432	Goat	Colon	6345652	1895878437
AWMGJ6-2	PRJNA723432	Goat	Colon	3807694	1137802319
AWMGJ7-2	PRJNA723432	Goat	Colon	7124627	2128320764
AWMGJ8-2	PRJNA723432	Goat	Colon	14826469	4428949943
AWMGJ9-1	PRJNA723432	Goat	Colon	8001137	2392542820
AWMGK10-1	PRJNA723432	Goat	Jejunum	744782	221669501
AWMGK1-1	PRJNA723432	Goat	Jejunum	737944	218453828
AWMGK11-2	PRJNA723432	Goat	Jejunum	758248	225890738
AWMGK12-2	PRJNA723432	Goat	Jejunum	878499	261801028
AWMGK13-2	PRJNA723432	Goat	Jejunum	3212171	956177307
AWMGK14-1	PRJNA723432	Goat	Jejunum	959529	286039321
AWMGK15-2	PRJNA723432	Goat	Jejunum	917965	273775195
AWMGK16-1	PRJNA723432	Goat	Jejunum	866816	258221329
AWMGK18-2	PRJNA723432	Goat	Jejunum	902667	268110849
AWMGK19-2	PRJNA723432	Goat	Jejunum	2001111	597420637
AWMGK20-1	PRJNA723432	Goat	Jejunum	919772	274498256
AWMGK2-1	PRJNA723432	Goat	Jejunum	992141	296020123
AWMGK21-2	PRJNA723432	Goat	Jejunum	892890	265601273
AWMGK3-1	PRJNA723432	Goat	Jejunum	895820	267165547
AWMGK4-1	PRJNA723432	Goat	Jejunum	628414	187065353
AWMGK5-1	PRJNA723432	Goat	Jejunum	2018595	602321309
AWMGK6-2	PRJNA723432	Goat	Jejunum	1405778	419140690
AWMGK7-2	PRJNA723432	Goat	Jejunum	683318	203511271
AWMGK8-2	PRJNA723432	Goat	Jejunum	705668	210140778
AWMGK9-2	PRJNA723432	Goat	Jejunum	3345720	999323763
AWMGL10-1	PRJNA723432	Goat	Rumen	23601748	7050574729
AWMGL1-1	PRJNA723432	Goat	Rumen	24162515	7210342910
AWMGL11-2	PRJNA723432	Goat	Rumen	24593788	7347193989
AWMGL12-2	PRJNA723432	Goat	Rumen	25360860	7580750489
AWMGL13-2	PRJNA723432	Goat	Rumen	26075590	7799125193
AWMGL20-1	PRJNA723432	Goat	Rumen	21089585	6306373008
AWMGL21-2	PRJNA723432	Goat	Rumen	19334656	5777805400
AWMGL2-2	PRJNA723432	Goat	Rumen	25027924	7487687862
AWMGL3-1	PRJNA723432	Goat	Rumen	24602796	7361177976
AWMGL4-1	PRJNA723432	Goat	Rumen	21918049	6551262875
AWMGL7-2	PRJNA723432	Goat	Rumen	21777743	6507635996
AWMGL8-2	PRJNA723432	Goat	Rumen	24171620	7225111223
AWMGL9-1	PRJNA723432	Goat	Rumen	23489918	7028054268
AWMGO10-1	PRJNA723432	Goat	Cecum	18717761	5590603846
AWMGO11-2	PRJNA723432	Goat	Cecum	24495564	7316885313
AWMGO1-2	PRJNA723432	Goat	Cecum	8234128	2458574778
AWMGO12-2	PRJNA723432	Goat	Cecum	10028074	2996984900
AWMGO13-2	PRJNA723432	Goat	Cecum	17410257	5208494192
AWMGO20-1	PRJNA723432	Goat	Cecum	15079330	4510277113
AWMGO2-1	PRJNA723432	Goat	Cecum	7788767	2329776067
AWMGO21-2	PRJNA723432	Goat	Cecum	22786719	6808292167
AWMGO3-1	PRJNA723432	Goat	Cecum	4992633	1492213731
AWMGO4-1	PRJNA723432	Goat	Cecum	14695190	4391451334
AWMGO5-1	PRJNA723432	Goat	Cecum	19652845	5874022194
AWMGO7-2	PRJNA723432	Goat	Cecum	17003523	5081364425
AWMGO8-2	PRJNA723432	Goat	Cecum	20271142	6057783999
AWMGO9-2	PRJNA723432	Goat	Cecum	13924765	4164715125
AWMGS10-1	PRJNA723432	Goat	Duodenum	680392	202443018
AWMGS11-2	PRJNA723432	Goat	Duodenum	1322445	394494679
AWMGS12-2	PRJNA723432	Goat	Duodenum	660011	196626906
AWMGS13-2	PRJNA723432	Goat	Duodenum	952738	284264275
AWMGS14-1	PRJNA723432	Goat	Duodenum	1173807	349844833
AWMGS16-1	PRJNA723432	Goat	Duodenum	1226510	365517837
AWMGS18-2	PRJNA723432	Goat	Duodenum	1084396	323360664
AWMGS19-1	PRJNA723432	Goat	Duodenum	1767250	527573844
AWMGS20-1	PRJNA723432	Goat	Duodenum	879627	262361798
AWMGS2-1	PRJNA723432	Goat	Duodenum	1412629	422007235
AWMGS21-2	PRJNA723432	Goat	Duodenum	726908	216405023
AWMGS3-1	PRJNA723432	Goat	Duodenum	728821	217322483
AWMGS5-1	PRJNA723432	Goat	Duodenum	2466919	736275277
AWMGS6-2	PRJNA723432	Goat	Duodenum	24038967	7189347115
AWMGS9-2	PRJNA723432	Goat	Duodenum	909184	271124419
AWMGW10-1	PRJNA723432	Goat	Reticulum	21538757	6435917163
AWMGW1-1	PRJNA723432	Goat	Reticulum	22596950	6753528589
AWMGW11-2	PRJNA723432	Goat	Reticulum	24738593	7389846259
AWMGW12-2	PRJNA723432	Goat	Reticulum	24695610	7380615168
AWMGW13-2	PRJNA723432	Goat	Reticulum	24320488	7275668780
AWMGW20-1	PRJNA723432	Goat	Reticulum	21357372	6388218457
AWMGW2-1	PRJNA723432	Goat	Reticulum	22210779	6645104224
AWMGW21-2	PRJNA723432	Goat	Reticulum	22565910	6743437030
AWMGW3-1	PRJNA723432	Goat	Reticulum	17801003	5319741370
AWMGW4-1	PRJNA723432	Goat	Reticulum	22256482	6652081257
AWMGW7-2	PRJNA723432	Goat	Reticulum	20211438	6039414172
AWMGW8-2	PRJNA723432	Goat	Reticulum	23593264	7051876867
AWMGW9-1	PRJNA723432	Goat	Reticulum	21214939	6346472915
AWMGZ11-2	PRJNA723432	Goat	Abomasum	19747992	5901725231
AWMGZ1-2	PRJNA723432	Goat	Abomasum	24159224	7221123210
AWMGZ13-2	PRJNA723432	Goat	Abomasum	23168283	6932139214
AWMGZ14-1	PRJNA723432	Goat	Abomasum	28149545	8420336439
AWMGZ15-2	PRJNA723432	Goat	Abomasum	20412031	6105643950
AWMGZ16-1	PRJNA723432	Goat	Abomasum	23111085	6913061439
AWMGZ18-1	PRJNA723432	Goat	Abomasum	19880784	5946301507
AWMGZ20-1	PRJNA723432	Goat	Abomasum	8785743	2627312792
AWMGZ2-1	PRJNA723432	Goat	Abomasum	18681020	5588833306
AWMGZ3-2	PRJNA723432	Goat	Abomasum	2176692	650435897
AWMGZ4-1	PRJNA723432	Goat	Abomasum	16897753	5050092743
AWMGZ5-1	PRJNA723432	Goat	Abomasum	8314246	2485623131
AWMGZ6-2	PRJNA723432	Goat	Abomasum	24637725	7367700639
AWMGZ7-2	PRJNA723432	Goat	Abomasum	23686085	7078798393
AWMGZ8-2	PRJNA723432	Goat	Abomasum	24369330	7285475252
AWMGZ9-2	PRJNA723432	Goat	Abomasum	5012500	1498963784
CF1	PRJNA723432	Goat	Rectum	23542684	7042639979
CF10	PRJNA723432	Goat	Rectum	21378875	6394041167
CF13	PRJNA723432	Goat	Rectum	23342209	6982557049
CF14	PRJNA723432	Goat	Rectum	21120279	6316913859
CF15	PRJNA723432	Goat	Rectum	20544388	6145416626
CF16	PRJNA723432	Goat	Rectum	21549477	6445218489
CF17	PRJNA723432	Goat	Rectum	20451316	6116659676
CF18	PRJNA723432	Goat	Rectum	18646474	5577289983
CF19	PRJNA723432	Goat	Rectum	23191197	6936547724
CF2	PRJNA723432	Goat	Rectum	25171571	7530989417
CF20	PRJNA723432	Goat	Rectum	19564536	5851987202
CF22	PRJNA723432	Goat	Rectum	21090243	6307674105
CF23	PRJNA723432	Goat	Rectum	21645114	6475359670
CF24	PRJNA723432	Goat	Rectum	19774296	5913565098
CF25	PRJNA723432	Goat	Rectum	22355924	6687253916
CF26	PRJNA723432	Goat	Rectum	21142307	6324338821
CF27	PRJNA723432	Goat	Rectum	20187745	6039584163
CF28	PRJNA723432	Goat	Rectum	28325824	8473109957
CF29	PRJNA723432	Goat	Rectum	20988198	6276530388
CF3	PRJNA723432	Goat	Rectum	20040960	5996104178
CF30	PRJNA723432	Goat	Rectum	20116526	6018440017
CF31	PRJNA723432	Goat	Rectum	20789538	6220129905
CF32	PRJNA723432	Goat	Rectum	21086512	6307849763
CF33	PRJNA723432	Goat	Rectum	23570357	7050235637
CF4	PRJNA723432	Goat	Rectum	22158637	6629302902
CF5	PRJNA723432	Goat	Rectum	23590985	7058092881
CF6	PRJNA723432	Goat	Rectum	23724076	7095873842
CF7	PRJNA723432	Goat	Rectum	21503862	6432490247
CF8	PRJNA723432	Goat	Rectum	24254971	7255384848
CF9	PRJNA723432	Goat	Rectum	21497713	6429256099
GXFCY1	PRJNA723432	Goat	Rectum	33269828	9936199087
GXFCY10	PRJNA723432	Goat	Rectum	23230236	6936886781
GXFCY11	PRJNA723432	Goat	Rectum	28231259	8423716724
GXFCY12	PRJNA723432	Goat	Rectum	27705733	8270272150
GXFCY13	PRJNA723432	Goat	Rectum	22558113	6745548864
GXFCY14	PRJNA723432	Goat	Rectum	23102848	6908419537
GXFCY15	PRJNA723432	Goat	Rectum	22452736	6680693836
GXFCY16	PRJNA723432	Goat	Rectum	23687033	7077368189
GXFCY17	PRJNA723432	Goat	Rectum	26035229	7779425589
GXFCY18	PRJNA723432	Goat	Rectum	33451330	9995762508
GXFCY19	PRJNA723432	Goat	Rectum	20382573	6080834091
GXFCY2	PRJNA723432	Goat	Rectum	27945919	8340113653
GXFCY20	PRJNA723432	Goat	Rectum	27803090	8305849891					38945672	7631836809
GXFCY21	PRJNA723432	Goat	Rectum	25482885	7614599426					62051998	11889440908
GXFCY22	PRJNA723432	Goat	Rectum	24318166	7268465536					50255519	9322380062
GXFCY23	PRJNA723432	Goat	Rectum	26560391	7940222601					68739612	13360149052
GXFCY24	PRJNA723432	Goat	Rectum	32380359	9672113734
GXFCY25	PRJNA723432	Goat	Rectum	29492741	8806314071
GXFCY26	PRJNA723432	Goat	Rectum	30183563	9012122336
GXFCY27	PRJNA723432	Goat	Rectum	28430979	8481821351
GXFCY28	PRJNA723432	Goat	Rectum	27084605	8089821708
GXFCY29	PRJNA723432	Goat	Rectum	28952521	8657560498
GXFCY3	PRJNA723432	Goat	Rectum	26834792	8013532309
GXFCY30	PRJNA723432	Goat	Rectum	21398897	6398302939
GXFCY31	PRJNA723432	Goat	Rectum	24081443	7176458820
GXFCY4	PRJNA723432	Goat	Rectum	20448138	6110537759
GXFCY5	PRJNA723432	Goat	Rectum	26012603	7773914808
GXFCY6	PRJNA723432	Goat	Rectum	23034327	6885015212
GXFCY7	PRJNA723432	Goat	Rectum	29089917	8691050742
GXFCY9	PRJNA723432	Goat	Rectum	24566662	7332343881
JHFTF1	PRJNA723432	Goat	Rectum	17430812	5153059314
JHFTF11	PRJNA723432	Goat	Rectum	17411448	5148086756
JHFTF12	PRJNA723432	Goat	Rectum	16628053	4901834239
JHFTF13	PRJNA723432	Goat	Rectum	16611278	4895315525
JHFTF14	PRJNA723432	Goat	Rectum	16774402	4952190956
JHFTF15	PRJNA723432	Goat	Rectum	17513933	5177112107
JHFTF16	PRJNA723432	Goat	Rectum	18601553	5511910749
JHFTF17	PRJNA723432	Goat	Rectum	16961105	5008793759
JHFTF18	PRJNA723432	Goat	Rectum	16895782	4987185488
JHFTF19	PRJNA723432	Goat	Rectum	15572389	4583518599
JHFTF2	PRJNA723432	Goat	Rectum	16367361	4818932929
JHFTF20	PRJNA723432	Goat	Rectum	16516174	4879563878
JHFTF21	PRJNA723432	Goat	Rectum	15693202	4630436415
JHFTF22	PRJNA723432	Goat	Rectum	17277985	5104837122
JHFTF23	PRJNA723432	Goat	Rectum	16435713	4848458571
JHFTF25	PRJNA723432	Goat	Rectum	17170287	5062997278
JHFTF26	PRJNA723432	Goat	Rectum	16551821	4884588348
JHFTF27	PRJNA723432	Goat	Rectum	16462488	4857859682
JHFTF28	PRJNA723432	Goat	Rectum	15096533	4445410753
JHFTF29	PRJNA723432	Goat	Rectum	19915747	5957400042
JHFTF3	PRJNA723432	Goat	Rectum	17827828	5248875461
JHFTF30	PRJNA723432	Goat	Rectum	15591980	4593401937
JHFTF31	PRJNA723432	Goat	Rectum	15525884	4569389524
JHFTF32	PRJNA723432	Goat	Rectum	16648685	4911799875
JHFTF33	PRJNA723432	Goat	Rectum	16868167	4980243354
JHFTF4	PRJNA723432	Goat	Rectum	16802724	4955625998
[truncated: 335 more rows]

## Sheet: Table S2
Number of ruminant gastrointestinal tract samples
Gastrointestinal tract		Stomach				Small intestine			Large intestine
Animal host	project	Rumen	Reticulum	Omasum	Abomasum	Duodenum	Jejunum	Ileum	Cecum	Colon	Rectum	Total
buffalo	PRJNA656389	129	28	32	22		24		31	30	399	695
buffalo	PRJNA657455	5	5	5	5	5	5	5	5	5	5	50
camel	PRJNA486341					2			2		2	6
cattle	PRJEB10338	8										8
cattle	PRJEB21624	45										45
cattle	PRJEB23561	171										171
cattle	PRJEB31266	240										240
cattle	PRJNA362629	18					36	18				72
cattle	PRJNA419351										32	32
cattle	PRJNA448333	48										48
cattle	PRJNA657455	6	6	6	6	6	6	6	6	6	6	60
cow	PRJEB34458	4										4
cow	PRJEB8939	14										14
cow	PRJNA485488										14	14
cow	PRJNA60251										13	13
deer	PRJEB12797	6										6
deer	PRJEB34458	6										6
deer	PRJNA301235										3	3
deer	PRJNA657455	10	10	10	10	10	10	10	10	10	10	100
goat	PRJNA486341					2			2		2	6
goat	PRJNA657455	6	6	6	6	6	6	6	6	6	6	60
goat	PRJNA723432	30	30	30	30	28	30	21	30	30	238	497
sheep	PRJEB14312										5	5
sheep	PRJEB34458	2										2
sheep	PRJNA202380	20										20
sheep	PRJNA214227	48										48
sheep	PRJNA512570										8	8
sheep	PRJNA657455	5	5	5	5	5	5	5	5	5	5	50
yak	PRJNA657455	5	5	5	5	5	5	5	5	5	5	50
Total		826	95	99	89	69	127	76	102	97	753	2333

## Sheet: Table S3
Detailed information for viral reference databases
Source	Animal host	Reference	Viral identification methods	Nr. of viral genomes	Nr. met the riteria of length > 1.5kbp and completeness > 50%	Nr. of virulent viruses (DeePhage)
Gut Virome Database (GVD)	Human	The Gut Virome Database Reveals Age-Dependent Patterns of Virome Diversity in the Human Gut	VirSorter1 VinFinder	33242	6819	2783
Gut Phage Database (GPD)	Human	Massive expansion of human gut bacteriophage diversity	VirSorter1 VinFinder	135889	76111	22320
Metagenomic Gut Virus catalog (MGV)	Human	Metagenomic compendium of 189,680 DNA viruses from the human gut microbiome	Viral detection pipeline like VirSorter VinFinder	187803	187800	69683
Chinese Human Gut Virome Catalogue (CHGV)	Human	Efficient recovery of complete gut phage genomes by combined short- and long-sequencing	VirSorter2 VinFinder PPR-Meta BLAST with NCBI Viral RefSeq, NCBI POG database	133217	15491	3721
Tanzania hunter	Human	Butyrate Production Pathway Abundances Are Similar in Human and Nonhuman Primate Gut Microbiomes		40	40	23
IMG/VR v3	-	IMG/VR v3: an integrated ecological and evolutionary framework for interrogating genomes of uncultivated viruses		2332703	112558	49978
NCBI viral Reference genomes	-	-	-	13006	-	-
Rumen Virome Database (RVD)	13 ruminant species: Bos taurus, Bos grunniens, Bos indicus, Ovis aries, Capra hircus, Odocoileus virginianus, Bison bison, Rangifer tarandus, Hydropotes inermis, Capreolus pygargus, Bubalus bubalis, Cervus elaphus, Alces alces	Interrogating the viral dark matter of the rumen ecosystem with a global virome database	VirSorter2 VIBRANT	397180	41738	20263
Rumen fluid microbial communities from healthy moose, Palmer, Alaska- post 0.2 um filtrate Viral contigs	Moose(Alces americanus)	Interspecies cross-feeding orchestrates carbon degradation in the rumen ecosystem	VirSorter1	1193	206	108
Rumen_mycoviruses, RNA viral contig	Sheep(Ovis aries)	Metatranscriptomics reveals mycoviral populations in the ovine rumen	BLAST with VTLC dataset	2466	7	7
Five Novel Bacteriophages From the Rumen	ovine, bovine	The Isolation and Genome Sequencing of Five Novel Bacteriophages From the Rumen Active Against Butyrivibrio fibrisolvens	BLAST with NCBI viral Reference genomes	5	5	4

## Sheet: Table S4
Statistics of assembly results of 2333 samples
Sample name	Bioproject accession	Contigs	Largest contig	Total length	N50	L50
ERR983262	PRJEB10338	88852	222407	348631863	6963	9502
ERR983263	PRJEB10338	113441	341314	412304166	6054	11714
ERR983264	PRJEB10338	82359	333643	367324880	9421	7522
ERR983265	PRJEB10338	138916	138916	409917669	3686	19822
ERR983266	PRJEB10338	82837	411264	242090017	3772	12309
ERR983267	PRJEB10338	125133	99187	272104955	2292	28654
ERR983268	PRJEB10338	160460	277114	424192239	3204	27979
ERR983269	PRJEB10338	100142	149554	224731633	2399	22207
ERR1278072	PRJEB12797	145649	389479	386597902	3021	27585
ERR1278073	PRJEB12797	61289	395901	172129850	3518	8355
ERR1278074	PRJEB12797	108616	256880	333040743	4212	14619
ERR1278103	PRJEB12797	157118	958735	492088390	4305	20551
ERR1278104	PRJEB12797	236960	351034	723797379	4227	30843
ERR1278105	PRJEB12797	154502	610540	507109208	4603	18506
ERR1447687	PRJEB14312	26	6079	53035	2137	8
ERR1448096	PRJEB14312	9797	30770	17059355	1673	2947
ERR1448097	PRJEB14312	3731	32911	7983509	2218	783
ERR1448098	PRJEB14312	12794	28411	24026097	1930	3783
ERR1448099	PRJEB14312	90	3051	123954	1350	35
ERR2027889	PRJEB21624	225554	404960	478499082	2124	50068
ERR2027890	PRJEB21624	163999	261139	341835796	2058	35832
ERR2027891	PRJEB21624	163014	313220	328201302	1953	38398
ERR2027892	PRJEB21624	128722	429164	432642969	5428	12247
ERR2027893	PRJEB21624	124313	353531	346960914	3619	16381
ERR2027894	PRJEB21624	100333	452597	370322084	7081	8422
ERR2027895	PRJEB21624	142062	387660	422730403	3942	17508
ERR2027896	PRJEB21624	302413	435694	841536955	3388	47100
ERR2027897	PRJEB21624	255890	245041	546931007	2172	57084
ERR2027898	PRJEB21624	147643	881053	519323343	6346	12309
ERR2027899	PRJEB21624	53353	351414	255377272	12427	3983
ERR2027900	PRJEB21624	120238	716754	416402165	6118	9886
ERR2027901	PRJEB21624	122356	420498	402457851	5235	11726
ERR2027902	PRJEB21624	218435	302306	531550925	2688	37993
ERR2027903	PRJEB21624	113208	509101	383772455	5503	11632
ERR2027904	PRJEB21624	82005	297767	354896550	9793	6337
ERR2027905	PRJEB21624	96025	395178	371696729	7766	8148
ERR2027906	PRJEB21624	64728	592137	279910218	11274	4596
ERR2027907	PRJEB21624	71961	432741	314237145	10915	4971
ERR2027908	PRJEB21624	210513	431862	564425015	3243	32191
ERR2027909	PRJEB21624	113456	426434	344262070	4367	13692
ERR2027910	PRJEB21624	81644	478165	188666599	2361	14269
ERR2027911	PRJEB21624	197339	383158	452546555	2429	39216
ERR2027912	PRJEB21624	201988	307501	457903266	2437	42377
ERR2027913	PRJEB21624	210909	350975	460598006	2280	46319
ERR2027914	PRJEB21624	258850	250606	577029738	2345	54232
ERR2027915	PRJEB21624	186929	408895	486341178	3078	31720
ERR2027916	PRJEB21624	263889	260057	617148443	2553	52841
ERR2027917	PRJEB21624	177781	395773	407335403	2433	35187
ERR2027918	PRJEB21624	159437	400852	394691632	2814	28153
ERR2027919	PRJEB21624	203770	410843	448881080	2275	42741
ERR2027920	PRJEB21624	248647	373594	592212207	2582	46210
ERR2027921	PRJEB21624	228648	466033	617876307	3354	34371
ERR2027922	PRJEB21624	187226	377167	392400707	2128	43310
ERR2027923	PRJEB21624	206997	244262	499729269	2681	39516
ERR2027924	PRJEB21624	220401	337152	527816194	2632	41953
ERR2027925	PRJEB21624	170012	329134	431825324	2938	29146
ERR2027926	PRJEB21624	177912	258198	418174703	2527	33784
ERR2027927	PRJEB21624	242023	354050	539490386	2351	51109
ERR2027928	PRJEB21624	209438	278456	493249253	2588	40466
ERR2027929	PRJEB21624	202660	376858	503611078	2813	36785
ERR2027930	PRJEB21624	171613	356767	395075583	2454	33015
ERR2282092	PRJEB21624	167492	302971	592154663	5724	20041
ERR2530126	PRJEB21624	77980	26371	126047500	1582	26658
ERR2530127	PRJEB21624	110084	54514	238499691	2377	28444
ERR2200465	PRJEB23561	5675	38836	9192060	1525	1830
ERR2200466	PRJEB23561	8485	118682	13431146	1475	2803
ERR2200467	PRJEB23561	7619	126876	12040912	1489	2571
ERR2200468	PRJEB23561	5531	60415	9086052	1566	1785
ERR2200469	PRJEB23561	6658	26980	9867424	1404	2406
ERR2200470	PRJEB23561	12831	99229	26035797	2042	3191
ERR2200471	PRJEB23561	6398	182560	16119655	2842	1031
ERR2200472	PRJEB23561	11475	44545	17491619	1423	3987
ERR2200473	PRJEB23561	9449	49426	17601575	1750	2442
ERR2200474	PRJEB23561	7859	45498	14825241	1842	2110
ERR2200475	PRJEB23561	11247	82762	21903789	1884	2865
ERR2200476	PRJEB23561	6386	42318	12857475	1963	1474
ERR2200477	PRJEB23561	7602	39753	11776341	1497	2669
ERR2200478	PRJEB23561	6690	42292	12638970	1803	1703
ERR2200479	PRJEB23561	8692	16798	13140833	1446	3108
ERR2200480	PRJEB23561	4446	20107	7007998	1497	1509
ERR2200481	PRJEB23561	2238	16650	3370377	1427	792
ERR2200482	PRJEB23561	3056	31214	6347901	2189	666
ERR2200483	PRJEB23561	9255	41163	17262313	1871	2666
ERR2200484	PRJEB23561	9928	78831	19100382	1873	2601
ERR2200485	PRJEB23561	4716	19427	7888572	1603	1481
ERR2200486	PRJEB23561	10854	33348	17582601	1565	3628
ERR2200487	PRJEB23561	7483	49175	12680086	1609	2329
ERR2200488	PRJEB23561	27789	169007	70275834	2890	5064
ERR2200489	PRJEB23561	25652	169005	63758191	2790	4724
ERR2200490	PRJEB23561	32401	180684	99534041	4200	5296
ERR2200491	PRJEB23561	21890	70521	46770098	2246	5277
ERR2200492	PRJEB23561	31995	113847	92427085	3856	5596
ERR2200493	PRJEB23561	1563	27194	3093625	2052	437
ERR2200494	PRJEB23561	1736	19114	3600238	2245	477
ERR2200495	PRJEB23561	1749	13001	3665071	2271	486
ERR2200496	PRJEB23561	1615	16313	3195317	2090	462
ERR2200497	PRJEB23561	1114	53959	1877105	1576	352
ERR2200498	PRJEB23561	1527	53959	2636296	1654	473
ERR2200499	PRJEB23561	1326	53959	2253000	1614	420
ERR2200500	PRJEB23561	1285	53959	2148331	1615	416
ERR2200501	PRJEB23561	21593	222706	70929786	4581	3143
ERR2200502	PRJEB23561	25498	289626	76906928	4237	3671
ERR2200503	PRJEB23561	20592	169464	54441177	3279	3593
ERR2200504	PRJEB23561	23503	169005	65217004	3439	4242
ERR2200505	PRJEB23561	20369	182707	53339548	3043	3837
ERR2200506	PRJEB23561	833	23829	1678667	2032	211
ERR2200507	PRJEB23561	1177	35646	2278849	1925	305
ERR2200508	PRJEB23561	1144	22527	2242388	1956	292
ERR2200509	PRJEB23561	1308	51536	2608786	2011	325
ERR2200510	PRJEB23561	5142	37882	7696378	1430	1860
ERR2200511	PRJEB23561	42506	113336	118180591	3477	8151
ERR2200512	PRJEB23561	75952	182138	268529718	5569	9752
ERR2200513	PRJEB23561	17795	205164	44701949	2855	3437
ERR2200514	PRJEB23561	17796	293858	45605994	2941	3278
ERR2200515	PRJEB23561	16122	73090	43838775	3313	2615
ERR2200516	PRJEB23561	10870	48177	24308878	2396	2474
ERR2200517	PRJEB23561	32327	99862	90990325	3668	5401
ERR2200518	PRJEB23561	69059	148534	206619383	4054	10095
ERR2200519	PRJEB23561	11498	22218	19405662	1628	3627
ERR2200520	PRJEB23561	30300	82244	83063908	3457	5510
ERR2200521	PRJEB23561	24651	111461	60291388	2778	4485
ERR2200522	PRJEB23561	2240	12833	3947876	1724	687
ERR2200523	PRJEB23561	3096	20292	5462251	1735	954
ERR2200524	PRJEB23561	2991	20205	5232283	1705	941
ERR2200525	PRJEB23561	3666	20493	6642914	1798	1124
ERR2200526	PRJEB23561	1118	35929	3958702	5665	176
ERR2200527	PRJEB23561	1205	38472	4471098	6961	173
ERR2200528	PRJEB23561	1116	58874	4378070	6830	150
ERR2200529	PRJEB23561	1305	68599	4801484	7964	154
ERR2200530	PRJEB23561	22046	134141	68870093	4584	3158
ERR2200531	PRJEB23561	19622	133152	62477972	4887	2346
ERR2200532	PRJEB23561	6487	42294	12378667	1797	1617
ERR2200533	PRJEB23561	23559	182707	54275228	2546	5045
ERR2200534	PRJEB23561	20070	115259	43096440	2244	4617
ERR2200535	PRJEB23561	16449	259808	37339348	2558	3831
ERR2200536	PRJEB23561	7590	52230	16566972	2314	1688
ERR2200537	PRJEB23561	6482	46228	14063246	2267	1531
ERR2200538	PRJEB23561	14736	231422	63208408	8928	1480
ERR2200539	PRJEB23561	27941	93618	76088592	3535	4914
ERR2200540	PRJEB23561	20293	77952	44300729	2324	4643
ERR2200541	PRJEB23561	16048	192882	49791505	4517	2249
ERR2200542	PRJEB23561	1028	16207	1735281	1658	328
ERR2200543	PRJEB23561	1210	11691	2089329	1694	389
ERR2200544	PRJEB23561	1212	12457	2080386	1687	387
ERR2200545	PRJEB23561	1035	20261	1740165	1605	339
ERR2200546	PRJEB23561	17089	85854	34622028	2079	4494
ERR2200547	PRJEB23561	16892	93835	34298902	2090	4464
ERR2200548	PRJEB23561	7482	300916	16324712	2071	1373
ERR2200549	PRJEB23561	7419	567781	16248651	2039	1287
ERR2200550	PRJEB23561	11053	36977	26807364	2829	2201
ERR2200551	PRJEB23561	11739	49784	28668521	2857	2312
ERR2200552	PRJEB23561	626	5600	997472	1521	216
ERR2200553	PRJEB23561	945	6321	1532743	1573	324
ERR2200554	PRJEB23561	854	6807	1394582	1599	296
ERR2200555	PRJEB23561	1068	12221	1806251	1708	356
ERR2200556	PRJEB23561	13877	29350	28580288	2168	3548
ERR2200557	PRJEB23561	16462	45478	33569444	2123	4238
ERR2200558	PRJEB23561	136	19117	303739	2466	32
ERR2200559	PRJEB23561	179	18035	376407	2330	46
ERR2200560	PRJEB23561	159	12551	329044	2284	40
ERR2200561	PRJEB23561	146	32993	304875	2268	34
ERR2200562	PRJEB23561	39	2911	59491	1544	15
ERR2200563	PRJEB23561	48	4337	73061	1399	17
ERR2200564	PRJEB23561	44	3824	64868	1487	17
ERR2200565	PRJEB23561	45	3544	70414	1447	16
ERR2200566	PRJEB23561	3011	171816	8363979	3758	291
ERR2200567	PRJEB23561	2005	35835	3295964	1554	645
ERR2200568	PRJEB23561	20	2185	26904	1292	8
ERR2200569	PRJEB23561	17	3901	24814	1254	7
ERR2200570	PRJEB23561	17	3811	27467	1760	6
ERR2200571	PRJEB23561	23	3898	34307	1401	9
ERR2200572	PRJEB23561	19	3405	27580	1277	8
ERR2200573	PRJEB23561	26	3501	38043	1393	10
ERR2200574	PRJEB23561	31	2466	45329	1402	12
ERR2200575	PRJEB23561	25	2164	36255	1498	10
ERR2200576	PRJEB23561	66	6305	147309	2528	20
ERR2200577	PRJEB23561	87	10926	185213	2235	25
ERR2200578	PRJEB23561	84	5887	168637	2322	24
ERR2200579	PRJEB23561	76	12452	176330	2885	22
ERR2200580	PRJEB23561	17	3189	23144	1324	7
ERR2200581	PRJEB23561	24	3589	34344	1371	10
ERR2200582	PRJEB23561	15	1996	19751	1211	7
ERR2200583	PRJEB23561	21	3776	28610	1239	8
ERR2200584	PRJEB23561	10	2177	13279	1228	5
ERR2200585	PRJEB23561	10	1877	13495	1198	5
ERR2200586	PRJEB23561	9	2186	12973	1689	4
ERR2200587	PRJEB23561	13	2185	17788	1455	5
ERR2200588	PRJEB23561	5961	52354	11869409	1920	1456
ERR2200589	PRJEB23561	24411	85381	44754919	1777	6854
ERR2200590	PRJEB23561	327	7352	461665	1331	126
ERR2200591	PRJEB23561	1572	14745	2620771	1607	504
ERR2200592	PRJEB23561	15951	54017	26813676	1618	5053
ERR2200593	PRJEB23561	694	8109	1019956	1388	255
ERR2200594	PRJEB23561	4734	60513	10575461	2363	1035
ERR2200595	PRJEB23561	5131	213676	14378081	3726	539
ERR2200596	PRJEB23561	3493	20633	5197837	1407	1248
ERR2200597	PRJEB23561	2202	29553	3421833	1466	750
ERR2200598	PRJEB23561	2540	27374	3968498	1509	882
ERR2200599	PRJEB23561	20	2179	25789	1173	9
ERR2200600	PRJEB23561	19	3802	28422	1402	7
ERR2200601	PRJEB23561	29	2187	38480	1248	12
ERR2200602	PRJEB23561	23	3604	33757	1387	9
ERR2200603	PRJEB23561	5003	45878	10827560	2335	1128
ERR2200604	PRJEB23561	663	4873	960869	1396	247
ERR2200605	PRJEB23561	1048	4532	1502029	1378	394
ERR2200606	PRJEB23561	7716	26973	11720336	1447	2733
ERR2200607	PRJEB23561	21	3516	32610	1440	8
ERR2200608	PRJEB23561	29	5228	52338	1754	10
ERR2200609	PRJEB23561	31	3960	46741	1372	12
ERR2200610	PRJEB23561	35	4999	60176	1915	11
ERR2200611	PRJEB23561	2163	136604	6841060	8638	99
ERR2200612	PRJEB23561	3085	87158	6474425	2208	732
ERR2200613	PRJEB23561	1295	7581	1988414	1477	460
ERR2200647	PRJEB23561	111727	663319	423972325	6618	12047
ERR2200648	PRJEB23561	76856	374507	271704364	5983	8334
ERR2200649	PRJEB23561	120494	886385	469292366	7083	12608
ERR2200650	PRJEB23561	117126	1012493	456171972	7109	12148
ERR2200659	PRJEB23561	240959	454727	731280336	4096	37002
ERR2200660	PRJEB23561	231305	251114	705678135	4143	35001
ERR2200661	PRJEB23561	108781	206697	342535793	4578	14992
ERR2200662	PRJEB23561	206910	411149	635750362	4200	29824
ERR2200663	PRJEB23561	393786	295102	1071145626	3362	68650
ERR2200664	PRJEB23561	395982	478515	1073843004	3334	69404
ERR2200665	PRJEB23561	300410	269810	806662232	3282	53249
ERR2200666	PRJEB23561	76195	239691	197136617	3075	13328
ERR2200667	PRJEB23561	113586	269730	288979301	2951	20961
ERR2200668	PRJEB23561	304742	308069	858211391	3583	49233
ERR2200669	PRJEB23561	322290	431459	929897378	3751	49769
ERR2200670	PRJEB23561	314253	431997	907461909	3749	48356
ERR2200671	PRJEB23561	58490	208230	171358753	3948	8500
ERR2200672	PRJEB23561	70612	207997	205181163	3852	10427
ERR2200673	PRJEB23561	103043	651215	429637790	7669	10723
ERR2200674	PRJEB23561	103632	651207	445769268	8119	10595
ERR2200675	PRJEB23561	57146	651207	231220799	8789	4384
ERR2200676	PRJEB23561	93710	651206	375107967	7489	8652
ERR3201375	PRJEB31266	85205	443955	287158494	5235	8025
ERR3201376	PRJEB31266	187792	243212	346990966	1785	52940
ERR3201377	PRJEB31266	114151	371725	336840121	4118	13203
ERR3201378	PRJEB31266	255212	156859	522029690	2054	65001
ERR3201379	PRJEB31266	172833	422616	416466490	2672	30652
ERR3201380	PRJEB31266	146859	384195	446186979	3859	18329
ERR3201381	PRJEB31266	191492	478406	423918513	2296	41300
ERR3201382	PRJEB31266	130272	282989	362201164	3249	19598
ERR3201383	PRJEB31266	126926	296588	375756767	3991	15125
ERR3201384	PRJEB31266	149949	298946	375869256	2857	26724
ERR3201385	PRJEB31266	71524	496900	281565869	8345	5851
ERR3201386	PRJEB31266	181673	360775	531426451	3860	24643
ERR3201387	PRJEB31266	159073	365089	384858216	2699	28636
ERR3201388	PRJEB31266	108029	289816	335970740	4546	12336
ERR3201389	PRJEB31266	209599	231868	437345583	2122	48932
ERR3201390	PRJEB31266	185961	545411	459061373	2726	30181
ERR3201391	PRJEB31266	109483	279601	278133092	2926	16690
ERR3201392	PRJEB31266	171246	263972	383407660	2318	37773
ERR3201393	PRJEB31266	226362	477942	510006698	2315	49568
ERR3201394	PRJEB31266	91105	518128	344269633	7950	6729
ERR3201395	PRJEB31266	135889	272186	309963030	2335	25387
ERR3201396	PRJEB31266	136309	428540	322636497	2481	23470
ERR3201397	PRJEB31266	164389	431187	378297390	2376	32793
ERR3201398	PRJEB31266	113247	325207	373949349	5004	11279
ERR3201399	PRJEB31266	192833	547471	453974337	2427	36556
ERR3201400	PRJEB31266	319801	465106	751431002	2564	62912
ERR3201401	PRJEB31266	124108	541354	423492912	5499	12218
ERR3201402	PRJEB31266	148448	543171	475501783	4342	17473
ERR3201403	PRJEB31266	257407	445607	567607049	2259	58697
ERR3201404	PRJEB31266	93374	517329	297326436	4294	10923
ERR3201405	PRJEB31266	276979	330150	604045952	2215	64374
ERR3201406	PRJEB31266	92089	360156	256684961	3174	15376
ERR3201407	PRJEB31266	288191	563590	669581836	2406	58320
ERR3201408	PRJEB31266	160066	561701	420918613	2908	29941
ERR3201409	PRJEB31266	148980	1001180	390874860	2831	25098
ERR3201410	PRJEB31266	267687	632418	573516666	2149	62282
ERR3201411	PRJEB31266	113255	282958	336229900	3738	14369
ERR3201412	PRJEB31266	98553	369235	320046958	4315	11796
ERR3201413	PRJEB31266	210902	544544	407663595	1943	59611
ERR3201414	PRJEB31266	196514	216673	383061866	1991	57047
ERR3201415	PRJEB31266	270936	287365	524853437	1916	74735
ERR3201416	PRJEB31266	309302	235351	636053504	2070	78218
ERR3201417	PRJEB31266	325513	367212	878406979	3278	51982
ERR3201418	PRJEB31266	317922	407227	694367045	2252	69070
ERR3201419	PRJEB31266	214344	175083	429390924	1985	52145
ERR3201420	PRJEB31266	108306	279352	360238120	5351	11015
ERR3201421	PRJEB31266	114910	893272	260543657	2337	21711
ERR3201422	PRJEB31266	107777	594772	251456250	2375	18588
ERR3211439	PRJEB31266	328673	453798	728592925	2335	71906
ERR3211440	PRJEB31266	115323	582455	394410251	5462	11686
ERR3211441	PRJEB31266	270624	505329	815985051	4098	31830
ERR3211442	PRJEB31266	135692	406518	554380174	8493	11695
ERR3211443	PRJEB31266	378269	327330	814514775	2212	88288
ERR3211444	PRJEB31266	363347	310847	727141175	1990	89911
ERR3211445	PRJEB31266	349125	381364	967881904	3494	51207
ERR3211446	PRJEB31266	428109	224230	935993746	2291	96180
ERR3211447	PRJEB31266	339384	385274	967497500	3666	47727
ERR3211448	PRJEB31266	163900	185771	362060882	2302	34124
ERR3211449	PRJEB31266	194186	422153	600521406	4334	23591
ERR3211450	PRJEB31266	98623	563597	386347183	8163	8026
ERR3211451	PRJEB31266	204939	259658	437590008	2157	44918
ERR3211452	PRJEB31266	281143	584280	655780582	2519	54182
ERR3211453	PRJEB31266	244230	397506	733109410	3985	33439
ERR3211454	PRJEB31266	217597	225648	408215043	1839	60082
ERR3211455	PRJEB31266	127616	422163	583627489	11015	10122
ERR3211456	PRJEB31266	176129	373079	692882571	8277	14075
ERR3211457	PRJEB31266	210341	321391	420990850	1978	52012
ERR3211458	PRJEB31266	148911	478533	502799691	5786	13991
ERR3211459	PRJEB31266	241042	252419	496205344	2069	57126
ERR3211460	PRJEB31266	284593	513860	790247427	3298	40555
ERR3211461	PRJEB31266	498156	310789	1023453851	2084	121046
ERR3211462	PRJEB31266	228354	377328	726560238	4496	27569
ERR3211463	PRJEB31266	276700	217690	558771974	1997	66528
ERR3211464	PRJEB31266	90179	422147	349220504	7951	7695
ERR3211465	PRJEB31266	84928	383057	257004520	4358	8972
ERR3211466	PRJEB31266	63419	120336	128051722	2044	15413
ERR3211467	PRJEB31266	129892	237518	275089770	2159	29240
ERR3211468	PRJEB31266	104756	249564	269299178	3006	17646
ERR3211469	PRJEB31266	89565	180949	208365041	2516	17489
ERR3211470	PRJEB31266	104905	411286	263288786	2860	18106
ERR3211471	PRJEB31266	82803	363672	304064841	6560	7906
ERR3211472	PRJEB31266	124403	292028	314060538	2906	20938
ERR3211473	PRJEB31266	107846	398507	332097021	4378	12931
ERR3211474	PRJEB31266	76119	449939	276167382	6587	6023
ERR3211475	PRJEB31266	55214	276784	210268182	7582	4674
ERR3211476	PRJEB31266	102426	361232	331920181	5068	11041
ERR3211477	PRJEB31266	120496	166106	243830755	2028	29348
ERR3211478	PRJEB31266	72511	334878	261631276	6425	6807
ERR3211479	PRJEB31266	139710	481496	273756321	1969	36490
ERR3211480	PRJEB31266	121977	397548	359138419	3867	15148
ERR3211481	PRJEB31266	113419	271852	277848576	2748	19639
ERR3211482	PRJEB31266	96184	339925	272700510	3651	13668
ERR3211483	PRJEB31266	135722	176150	271372925	1987	33202
ERR3211484	PRJEB31266	164365	310584	423374035	2966	27289
ERR3211485	PRJEB31266	120107	426714	367728806	4259	13581
ERR3211486	PRJEB31266	95363	357493	334609735	5767	9633
ERR3220178	PRJEB31266	265528	277256	611116559	2448	52958
ERR3220179	PRJEB31266	345620	390515	779177063	2381	71920
ERR3220180	PRJEB31266	313911	297537	770847005	2773	57322
ERR3220181	PRJEB31266	282853	377320	657782473	2523	55240
ERR3220182	PRJEB31266	307229	230652	769280958	2882	53626
ERR3220183	PRJEB31266	284158	385050	661589591	2547	56989
ERR3220184	PRJEB31266	271191	459681	663400608	2769	49457
ERR3220185	PRJEB31266	327239	438620	773538277	2597	63511
ERR3220186	PRJEB31266	337727	328306	833715494	2806	62255
ERR3220187	PRJEB31266	358030	289315	844704714	2555	69418
ERR3220188	PRJEB31266	385545	400954	886156758	2489	79018
ERR3220189	PRJEB31266	432773	605587	1080090070	2869	76900
ERR3220190	PRJEB31266	384093	293976	886502106	2496	79074
ERR3220191	PRJEB31266	331055	394700	808175903	2760	62208
ERR3220192	PRJEB31266	297214	369598	678230303	2441	60696
ERR3220193	PRJEB31266	280693	372519	679213001	2700	54399
ERR3220194	PRJEB31266	376570	370730	925657071	2749	67981
ERR3220195	PRJEB31266	213694	341246	643682910	4167	28487
ERR3220196	PRJEB31266	368877	243925	876692938	2572	67688
ERR3220197	PRJEB31266	315405	465695	801543107	2913	52735
ERR3220198	PRJEB31266	324437	253172	753109353	2524	66788
ERR3220199	PRJEB31266	264569	231187	684104216	3047	43852
ERR3220200	PRJEB31266	308477	411236	748125643	2688	56768
ERR3220201	PRJEB31266	340305	371894	785802519	2445	67427
ERR3220202	PRJEB31266	359119	336352	786701654	2311	79560
ERR3220203	PRJEB31266	190803	227945	472664767	2824	32641
ERR3220204	PRJEB31266	232424	180611	546667004	2552	44145
ERR3220205	PRJEB31266	301471	168117	644636788	2197	68019
ERR3220206	PRJEB31266	251248	328705	645997900	2996	41949
ERR3220207	PRJEB31266	296723	312880	652139909	2308	65406
ERR3220208	PRJEB31266	292180	270632	632568916	2253	65922
ERR3220209	PRJEB31266	254265	317230	627498868	2807	47028
ERR3220210	PRJEB31266	233296	327148	562917474	2699	44186
ERR3220211	PRJEB31266	279589	295250	636000223	2410	57350
ERR3220212	PRJEB31266	205626	415441	557998370	3370	31953
ERR3220213	PRJEB31266	291370	241110	663300339	2448	61971
ERR3220214	PRJEB31266	292339	524018	686035919	2552	56818
ERR3220215	PRJEB31266	320687	293667	712690769	2317	68683
ERR3220216	PRJEB31266	284860	296848	662955989	2512	55491
ERR3220217	PRJEB31266	281764	534295	691269533	2748	49314
ERR3220218	PRJEB31266	170005	281516	521674217	4330	22288
ERR3220219	PRJEB31266	296668	240273	635115183	2197	66438
ERR3220220	PRJEB31266	300761	524018	665842271	2340	66177
ERR3220221	PRJEB31266	246205	218527	617841455	2865	43577
ERR3220222	PRJEB31266	325623	407227	718125158	2315	71317
ERR3220223	PRJEB31266	284843	426724	712983779	2864	51615
ERR3220224	PRJEB31266	286224	231998	685696986	2647	56678
ERR3220225	PRJEB31266	280653	561345	681107290	2692	50298
ERR3224567	PRJEB31266	298368	417676	740831728	2812	53122
ERR3224568	PRJEB31266	200103	519892	637336126	4613	21082
ERR3224569	PRJEB31266	86768	348980	359236522	9455	6590
ERR3224570	PRJEB31266	242262	835447	665591189	3430	34520
ERR3224571	PRJEB31266	261053	428595	678493724	3091	42894
ERR3224572	PRJEB31266	96834	398725	380698083	8966	7044
ERR3224573	PRJEB31266	366032	480465	837477755	2406	80243
ERR3224574	PRJEB31266	150879	324849	464784777	3890	19007
ERR3224575	PRJEB31266	215111	710005	526812969	2724	35712
ERR3224576	PRJEB31266	163066	359267	515151052	4361	19020
ERR3224577	PRJEB31266	205070	420032	666302621	4659	22175
ERR3224578	PRJEB31266	265187	400807	713185075	3258	41476
ERR3224579	PRJEB31266	168012	612642	551149268	4536	19475
ERR3224580	PRJEB31266	153676	408713	495469409	4846	17315
ERR3224581	PRJEB31266	119678	475972	456998709	7524	10207
ERR3224582	PRJEB31266	90115	403409	419174365	11209	7034
ERR3224583	PRJEB31266	153963	638061	473806175	3910	20406
ERR3224584	PRJEB31266	180183	411687	589393066	4872	20099
ERR3224585	PRJEB31266	522533	514214	1213947503	2463	102982
ERR3224586	PRJEB31266	120471	479084	442851918	7172	10560
ERR3224587	PRJEB31266	402435	353497	914921419	2416	84287
ERR3224588	PRJEB31266	507815	376458	1132841507	2342	108897
ERR3224589	PRJEB31266	105923	519159	428055888	8493	8749
ERR3224590	PRJEB31266	190159	604483	604489442	4620	20357
ERR3224591	PRJEB31266	107785	410119	446708017	8625	9158
ERR3224592	PRJEB31266	229265	418179	743716326	4710	26393
ERR3224593	PRJEB31266	159346	329321	489460919	4124	17146
ERR3224594	PRJEB31266	441209	485671	1010051681	2424	88183
ERR3224595	PRJEB31266	157682	391726	542540778	5653	15520
ERR3224596	PRJEB31266	214203	663072	707065614	5010	21568
ERR3224597	PRJEB31266	200175	545389	680678908	5506	18903
ERR3224598	PRJEB31266	451394	455852	1043017465	2468	90214
ERR3224599	PRJEB31266	415584	579246	950174842	2445	85532
ERR3224600	PRJEB31266	348726	480715	887163609	2941	57171
ERR3224601	PRJEB31266	152911	514849	565162140	7098	12431
ERR3224602	PRJEB31266	424184	606149	956694322	2357	87049
ERR3224603	PRJEB31266	137933	344314	467143574	5645	12933
ERR3224604	PRJEB31266	355276	517055	813163119	2439	71659
ERR3224605	PRJEB31266	422957	833097	962106119	2381	84816
ERR3224606	PRJEB31266	202852	836250	660273405	4773	22197
ERR3224607	PRJEB31266	309015	574605	857167631	3481	44448
ERR3224608	PRJEB31266	206603	423526	628394023	4035	24374
ERR3224609	PRJEB31266	398888	598992	975055771	2731	71460
ERR3224610	PRJEB31266	122088	410532	504769261	9343	9105
ERR3224611	PRJEB31266	207535	528118	759953712	6571	18536
ERR3224612	PRJEB31266	301718	329510	762512332	2896	50322
ERR3224613	PRJEB31266	124362	511644	443626405	6414	11301
ERR3224614	PRJEB31266	405790	353934	978196149	2662	75359
ERR3275091	PRJEB31266	410945	412739	933782531	2344	83050
ERR3275092	PRJEB31266	419013	384346	891139945	2137	94901
ERR3275093	PRJEB31266	397160	413323	825230685	2093	96619
ERR3275094	PRJEB31266	389871	732729	867562176	2289	84414
ERR3275095	PRJEB31266	433035	277228	988115001	2384	89870
ERR3275096	PRJEB31266	548978	705874	1173336914	2205	128162
ERR3275097	PRJEB31266	127048	439423	493167743	7717	10550
ERR3275098	PRJEB31266	307714	716649	791062347	2867	56796
ERR3275099	PRJEB31266	187519	515194	751329909	8108	15853
ERR3275100	PRJEB31266	335017	831161	853913183	2815	60787
ERR3275101	PRJEB31266	305900	521324	897227025	3885	36038
ERR3275102	PRJEB31266	81158	459110	365475332	9893	6462
ERR3275103	PRJEB31266	324819	800391	1048044017	4859	38256
ERR3275104	PRJEB31266	294009	544063	819795359	3407	40106
ERR3275105	PRJEB31266	318712	781752	908255697	3614	44146
ERR3275106	PRJEB31266	569108	326828	1217520643	2181	128886
ERR3275107	PRJEB31266	397908	319702	1152802978	3692	57950
ERR3275108	PRJEB31266	412935	511971	1103715239	3168	63981
ERR3275109	PRJEB31266	137026	448287	575483170	8918	11602
ERR3275110	PRJEB31266	235448	716577	925755308	8037	18748
ERR3275111	PRJEB31266	213546	667021	819749951	7160	19470
ERR3275112	PRJEB31266	160918	396475	592974279	6829	14483
ERR3275113	PRJEB31266	334855	627407	1076145578	4853	37865
ERR3275114	PRJEB31266	473894	457039	1107069623	2520	94147
ERR3275115	PRJEB31266	301054	406433	912954560	4107	38509
ERR3275116	PRJEB31266	391023	435333	1061599426	3308	59840
ERR3275117	PRJEB31266	59793	330866	302666427	12112	4991
ERR3275118	PRJEB31266	177192	470589	670241546	7410	15214
ERR3275119	PRJEB31266	149044	592310	593822832	8845	11335
ERR3275120	PRJEB31266	79636	432384	365026044	11134	6277
ERR3275121	PRJEB31266	115461	592282	511047297	9432	9340
ERR3275122	PRJEB31266	571559	542630	1256556790	2266	125485
ERR3275123	PRJEB31266	456686	296308	929956922	2054	119746
ERR3275124	PRJEB31266	347804	412548	909736926	3093	57652
ERR3275125	PRJEB31266	435055	484651	1012865647	2512	86005
ERR3275126	PRJEB31266	439769	405568	1107836243	2910	78592
ERR3275127	PRJEB31266	512345	330638	1101884211	2213	116424
ERR3275128	PRJEB31266	498288	383995	1154484945	2504	100328
ERR3275129	PRJEB31266	431073	235398	1038759375	2703	83515
ERR3275130	PRJEB31266	185138	525416	589515835	4606	21416
ERR3275131	PRJEB31266	190168	568109	710879884	7658	14814
ERR3275132	PRJEB31266	189072	1022941	707651277	6857	17115
ERR3275133	PRJEB31266	423934	300344	1034202563	2697	77645
ERR3275134	PRJEB31266	490791	483777	1144859361	2523	96252
ERR3275135	PRJEB31266	153047	392158	596951562	7752	12983
ERR3275136	PRJEB31266	113609	517538	476362751	9630	8299
ERR3275137	PRJEB31266	100671	582062	439941750	10294	7656
ERR3275138	PRJEB31266	231927	686192	821156246	6161	21531
ERR3525309	PRJEB34458	99921	427425	307718208	4265	11923
ERR3525310	PRJEB34458	181249	354336	583296252	4670	23317
ERR3525311	PRJEB34458	203170	293461	463008743	2476	45638
ERR3525312	PRJEB34458	188975	405171	433023497	2504	44124
ERR3525313	PRJEB34458	219024	253437	511069269	2532	47538
ERR3525314	PRJEB34458	179719	161979	377471567	2159	44382
ERR3525315	PRJEB34458	405102	220847	918618749	2417	91598
ERR3525316	PRJEB34458	207096	339678	485113414	2541	43243
ERR3525317	PRJEB34458	423592	284515	919140820	2245	97231
ERR3525318	PRJEB34458	296555	301358	572231430	1905	79341
ERR3525319	PRJEB34458	334263	294638	694342141	2100	81887
ERR3525320	PRJEB34458	295445	358411	705559926	2630	57876
ERR833046	PRJEB8939	19737	224484	47103348	2525	2774
ERR833047	PRJEB8939	13321	51868	27573366	2133	3215
ERR833048	PRJEB8939	1267	8677	1771530	1314	475
ERR833049	PRJEB8939	8450	33889	13935608	1575	2690
ERR833050	PRJEB8939	9993	103698	19736770	2013	2510
ERR833051	PRJEB8939	16331	79187	27375348	1604	5098
ERR833052	PRJEB8939	30094	143643	54014628	1679	8383
ERR833211	PRJEB8939	11231	43775	18174503	1544	3677
ERR833212	PRJEB8939	8968	23672	15694298	1657	2609
ERR833213	PRJEB8939	7787	33928	16701617	2363	1690
ERR833214	PRJEB8939	7883	50614	12915023	1550	2502
ERR833215	PRJEB8939	8943	129750	15323753	1610	2661
ERR833216	PRJEB8939	7221	64295	11767781	1536	2294
ERR833217	PRJEB8939	7221	64295	11767781	1536	2294
SRR1206671	PRJNA202380	809159	679415	2035957696	2880	150479
SRR1222429	PRJNA202380	633868	619640	1740080331	3387	105951
SRR1222431	PRJNA202380	847378	537177	2004674317	2592	172644
SRR1267595	PRJNA202380	456233	695753	1244531412	3279	73495
SRR873595	PRJNA202380	527350	410470	1504043212	3642	78659
SRR873596	PRJNA202380	519817	473900	1495307995	3677	73425
SRR873597	PRJNA202380	589164	672949	1669652001	3530	90431
SRR873598	PRJNA202380	516387	571016	1409897001	3315	81541
SRR873599	PRJNA202380	503683	509433	1515822172	4041	69454
SRR873600	PRJNA202380	538401	412721	1491867384	3339	86432
SRR873601	PRJNA202380	591492	588256	1768412669	4070	80917
SRR873602	PRJNA202380	557493	477666	1555130279	3476	90002
SRR873603	PRJNA202380	640647	476486	1797470895	3514	98293
SRR873604	PRJNA202380	825066	899589	2049536403	2821	157521
SRR873605	PRJNA202380	864869	445855	2134733742	2772	167731
SRR873606	PRJNA202380	714840	452964	1843658973	2976	130273
SRR873607	PRJNA202380	815870	446678	2057027774	2890	154527
SRR873608	PRJNA202380	753266	1289626	2065847137	3342	116064
SRR873609	PRJNA202380	804289	549278	2103675023	3087	140457
SRR873610	PRJNA202380	687596	418622	1754933133	2930	124925
SRR4435554	PRJNA214227	110466	304187	361357336	4978	12258
SRR4435555	PRJNA214227	40470	276977	169579112	8953	3586
SRR4435556	PRJNA214227	72826	583215	239148011	4856	7467
SRR4435557	PRJNA214227	104706	326705	315435910	3855	13996
SRR4435558	PRJNA214227	75502	506367	302904268	8111	6353
SRR4435559	PRJNA214227	104288	435514	351107843	5433	10380
SRR4435560	PRJNA214227	44364	522897	170144791	6371	5364
SRR4435561	PRJNA214227	66345	713401	266799295	8076	6180
SRR4435562	PRJNA214227	62813	300684	248865193	7340	6207
SRR4435563	PRJNA214227	55736	353738	202461560	6049	5997
SRR4435564	PRJNA214227	44045	398868	207138572	10619	3749
SRR4435565	PRJNA214227	46734	203217	177553484	6880	4578
SRR4435566	PRJNA214227	44768	339985	207883093	10282	4112
SRR4435567	PRJNA214227	53623	334383	218867852	7490	5321
SRR4435568	PRJNA214227	72717	459048	144880520	1932	17809
SRR4435569	PRJNA214227	61942	103830	105891743	1638	19242
SRR4435570	PRJNA214227	94740	242041	230104168	2675	17163
SRR4435571	PRJNA214227	79045	321673	197399684	2844	13842
SRR4435572	PRJNA214227	89816	430018	296738492	5076	9839
SRR4435573	PRJNA214227	117333	413457	302016232	2919	19716
SRR4435574	PRJNA214227	31726	198784	58001178	1722	8689
SRR4435575	PRJNA214227	53712	363342	113846921	2186	12426
SRR4435576	PRJNA214227	99554	424343	359650376	6384	8870
SRR4435577	PRJNA214227	81972	329755	336010335	8277	7075
SRR4435578	PRJNA214227	85977	504455	328708128	6935	7780
SRR4435579	PRJNA214227	68616	567881	262638864	7090	5950
SRR4435580	PRJNA214227	58421	407324	240011627	8623	4738
SRR4435581	PRJNA214227	112608	264442	309748574	3186	19521
SRR4435582	PRJNA214227	61813	387713	147036544	2561	10839
SRR4435583	PRJNA214227	55863	190791	118960106	2110	12077
SRR4435584	PRJNA214227	51105	105622	105997524	2140	12685
SRR4435585	PRJNA214227	56554	296247	126259610	2311	11281
SRR948088	PRJNA214227	45621	298256	109081714	2542	7659
SRR948090	PRJNA214227	53778	429029	158006997	4071	5207
SRR948091	PRJNA214227	134851	380021	293359692	2169	29292
SRR948118	PRJNA214227	93187	215762	265686592	3751	12340
SRR948119	PRJNA214227	40534	213711	119322946	4058	5273
SRR948120	PRJNA214227	34881	214968	105658426	4384	4110
SRR948121	PRJNA214227	84667	194533	211973107	2824	13716
SRR948122	PRJNA214227	132678	425518	321956953	2562	22439
SRR948123	PRJNA214227	16497	354298	95698031	16941	1221
SRR948124	PRJNA214227	31328	351435	150465459	11918	2540
SRR948125	PRJNA214227	28230	324303	134108623	11851	2221
SRR948129	PRJNA214227	14641	133650	60507025	8260	1429
SRR948132	PRJNA214227	27016	298013	127477269	11216	2236
SRR948135	PRJNA214227	20029	319556	86895555	9089	1774
SRR948136	PRJNA214227	25859	237521	110215813	9957	2007
SRR948137	PRJNA214227	38625	412535	159160869	8000	3630
SRR2959502	PRJNA301235	151298	744946	543948565	5540	15110
SRR2959740	PRJNA301235	71251	888231	260968793	7167	5928
SRR6122973	PRJNA301235	82710	351355	191984444	2469	19083
SRR5190213	PRJNA362629	117333	413457	302016232	2919	19716
SRR5190214	PRJNA362629	31726	198784	58001178	1722	8689
SRR5190215	PRJNA362629	289	25232	888528	4323	51
SRR5190216	PRJNA362629	1755	267996	6734871	7219	143
SRR5190217	PRJNA362629	2172	156222	5331385	2792	450
SRR5190218	PRJNA362629	133	17244	302891	2433	32
SRR5190219	PRJNA362629	4985	159850	13307929	3051	828
SRR5190220	PRJNA362629	566	30282	1246986	2379	103
SRR5190221	PRJNA362629	336	21176	960228	3758	66
SRR5190222	PRJNA362629	322	446092	2029262	35736	6
SRR5190223	PRJNA362629	17463	353850	104816326	20404	1018
SRR5190224	PRJNA362629	51105	105622	105997524	2140	12685
SRR5190225	PRJNA362629	45621	298256	109081714	2542	7659
SRR5190226	PRJNA362629	53778	429029	158006997	4071	5207
SRR5190227	PRJNA362629	134851	380021	293359692	2169	29292
SRR5190228	PRJNA362629	93187	215762	265686592	3751	12340
SRR5190229	PRJNA362629	40534	213711	119322946	4058	5273
SRR5190230	PRJNA362629	34881	214968	105658426	4384	4110
SRR5190231	PRJNA362629	132678	425518	321956953	2562	22439
SRR5190232	PRJNA362629	16497	354298	95698031	16941	1221
SRR5190233	PRJNA362629	31328	351435	150465459	11918	2540
SRR5190234	PRJNA362629	28230	324303	134108623	11851	2221
SRR5190235	PRJNA362629	14641	133650	60507025	8260	1429
SRR5190236	PRJNA362629	20029	319556	86895555	9089	1774
SRR5190237	PRJNA362629	25859	237521	110215813	9957	2007
SRR5190238	PRJNA362629	38625	412535	159160869	8000	3630
SRR5190239	PRJNA362629	473	26955	1083594	2643	88
SRR5190240	PRJNA362629	1960	26610	3978847	2157	520
SRR5190241	PRJNA362629	15308	560674	54930175	6477	1093
SRR5190242	PRJNA362629	1138	415335	4610250	22529	24
SRR5190243	PRJNA362629	286	23949	816334	3853	53
SRR5190244	PRJNA362629	228	30644	684807	4715	34
SRR5190245	PRJNA362629	20699	591386	103758780	14724	1280
SRR5190246	PRJNA362629	7421	499659	33789917	10400	528
SRR5190247	PRJNA362629	227	19367	690942	4278	44
SRR5190248	PRJNA362629	19334	519138	115992396	17920	1353
SRR5190249	PRJNA362629	283	22302	873579	4430	52
SRR5190250	PRJNA362629	249	24338	724011	3645	47
SRR5190251	PRJNA362629	298	30363	926712	4140	51
SRR5190252	PRJNA362629	1501	33244	4472156	3777	296
SRR5190253	PRJNA362629	3752	271213	13426840	5758	353
SRR5190254	PRJNA362629	119	7639	259230	2375	34
SRR5190255	PRJNA362629	1482	22615	2504802	1545	449
SRR5190256	PRJNA362629	791	30932	1614010	2007	174
SRR5190257	PRJNA362629	7004	316940	39192369	15517	515
SRR5190258	PRJNA362629	564	30757	1815356	4250	118
SRR5190259	PRJNA362629	8225	298074	26056666	4201	1165
SRR5190260	PRJNA362629	6461	387474	30497001	10346	487
SRR5190261	PRJNA362629	1487	35407	3870039	3047	339
SRR5190262	PRJNA362629	6266	591526	33350067	15419	355
SRR5190263	PRJNA362629	4244	136068	17524995	8351	450
SRR5190264	PRJNA362629	6906	233046	28524370	10098	472
SRR5190265	PRJNA362629	4115	252462	19819069	7893	481
SRR5190266	PRJNA362629	492	262452	3878571	67127	16
SRR5190267	PRJNA362629	1504	143479	4085435	3285	329
SRR5190268	PRJNA362629	329	28157	988476	4098	61
SRR5190269	PRJNA362629	285	20656	859154	4111	54
SRR5190270	PRJNA362629	27914	400576	169307671	23377	1520
SRR5190271	PRJNA362629	4385	261379	12127485	3048	607
SRR5190272	PRJNA362629	11229	208652	54681371	12125	928
SRR5190273	PRJNA362629	14281	315770	89150758	18346	1073
SRR5190274	PRJNA362629	16740	408501	117252010	26092	1099
SRR5190275	PRJNA362629	20296	374117	109803261	15205	1338
SRR5190276	PRJNA362629	16361	410626	95416271	16167	1196
SRR5190277	PRJNA362629	20588	509583	115120170	21170	1079
SRR5190278	PRJNA362629	26140	410626	151238580	18811	1535
SRR5190279	PRJNA362629	13200	344233	93310847	23781	832
SRR5190280	PRJNA362629	20772	610402	112624405	15438	1513
SRR5190281	PRJNA362629	18106	393482	106073373	16725	1357
SRR5190282	PRJNA362629	22924	610410	119254040	17791	1260
SRR5190283	PRJNA362629	20950	440410	122833129	20101	1230
SRR5190284	PRJNA362629	21998	382633	113600776	16360	1280
SRR6958874	PRJNA419351	79839	296947	247909392	4633	9931
SRR6958875	PRJNA419351	65713	336903	205004432	4717	7839
SRR6958876	PRJNA419351	78926	157349	269258080	5493	9369
SRR6958877	PRJNA419351	108080	326631	326720659	4235	14065
SRR6958878	PRJNA419351	91726	215883	282162464	4338	11700
SRR6958879	PRJNA419351	91160	218676	293830924	4797	11233
SRR6958880	PRJNA419351	101873	326640	316449672	4593	12061
SRR6958881	PRJNA419351	88393	244146	277236033	4831	10502
SRR6958882	PRJNA419351	91293	289645	262096826	3689	13205
SRR6958883	PRJNA419351	69374	289333	234294644	5520	7900
SRR6958884	PRJNA419351	81857	277865	245227464	4185	10822
SRR6958885	PRJNA419351	86817	400600	273460913	4588	10545
SRR6958886	PRJNA419351	74236	167356	241019233	5102	8995
SRR6958887	PRJNA419351	95677	505768	321962054	5442	10142
SRR6958888	PRJNA419351	44371	362441	116077015	3170	7085
SRR6958889	PRJNA419351	48821	204808	142785245	3985	6582
SRR6958890	PRJNA419351	37871	285981	102436290	3307	5855
SRR6958891	PRJNA419351	50754	278717	138832206	3303	7717
SRR6958892	PRJNA419351	69578	174094	188854902	3393	10577
SRR6958893	PRJNA419351	57258	218627	172663148	4256	8056
SRR6958894	PRJNA419351	58357	173460	164512677	3667	8488
SRR6958895	PRJNA419351	54424	263862	143203095	3079	8943
SRR6958896	PRJNA419351	96116	300370	289158764	4218	12422
SRR6958897	PRJNA419351	23140	87462	54649840	2626	5061
SRR6958898	PRJNA419351	86623	505709	262325473	4303	11435
SRR6958899	PRJNA419351	75804	302262	254658037	5406	8055
SRR6958900	PRJNA419351	85104	351935	249090717	3880	12066
SRR6958901	PRJNA419351	81216	344079	223539078	3446	11859
SRR6958902	PRJNA419351	82304	249845	279272579	5574	8845
SRR6958903	PRJNA419351	81512	276058	252090198	4481	10509
SRR6958904	PRJNA419351	78764	347732	250720526	4813	9568
SRR6958905	PRJNA419351	68099	326698	219749394	5015	7600
SRR8397881	PRJNA448333	66473	447340	236151931	5914	6595
SRR8397882	PRJNA448333	69563	426326	264818847	6408	7643
SRR8397883	PRJNA448333	64657	854193	214325150	5273	6899
SRR8397884	PRJNA448333	99120	447340	310544085	4402	11612
SRR8397885	PRJNA448333	77867	940920	271649206	5579	9094
SRR8397886	PRJNA448333	63594	631912	208151465	4781	6146
SRR8397887	PRJNA448333	63744	412939	254754050	8623	5222
SRR8397888	PRJNA448333	72760	447340	253717890	5608	7647
SRR8397889	PRJNA448333	45175	370039	173471719	7292	4130
SRR8397890	PRJNA448333	81085	314764	249465798	4144	10042
SRR8397891	PRJNA448333	45341	323728	165588358	6265	4623
SRR8397892	PRJNA448333	68752	516842	226181545	4966	7576
SRR8397893	PRJNA448333	56019	854313	156867998	3431	7998
SRR8397894	PRJNA448333	52377	423983	219850634	8662	4314
SRR8397895	PRJNA448333	78933	634231	225505697	3399	11270
SRR8397896	PRJNA448333	50629	940958	168454400	5124	5686
SRR8397897	PRJNA448333	51450	346000	165249612	4542	6536
SRR8397898	PRJNA448333	50202	373630	188534934	6271	5062
SRR8397899	PRJNA448333	63944	439869	240720975	6430	6389
SRR8397900	PRJNA448333	60679	402417	229236563	6582	6159
SRR8397901	PRJNA448333	58430	402559	202056104	5591	6196
SRR8397902	PRJNA448333	64232	292164	252817402	7973	5572
SRR8397903	PRJNA448333	64271	854324	209676995	4901	6680
SRR8397904	PRJNA448333	78985	710328	279603352	6214	7172
SRR8397905	PRJNA448333	71453	523506	251723973	5658	7675
SRR8397906	PRJNA448333	81297	516326	283674771	5909	8361
SRR8397907	PRJNA448333	60173	1062952	203030892	5232	6282
SRR8397908	PRJNA448333	65976	496292	235624341	6113	6619
SRR8397909	PRJNA448333	60801	940845	204798401	5256	5847
SRR8397910	PRJNA448333	82645	420448	291048020	6158	7385
SRR8397911	PRJNA448333	45899	439765	197901517	9590	3965
SRR8397912	PRJNA448333	42120	426326	176290717	9314	3289
SRR8397913	PRJNA448333	57933	441989	212842421	6587	5425
SRR8397914	PRJNA448333	71284	447340	249768421	5638	7291
SRR8397915	PRJNA448333	62667	322715	218278125	5880	6437
SRR8397916	PRJNA448333	60519	447340	227673242	6571	5782
SRR8397917	PRJNA448333	44245	439869	208299512	13148	2928
SRR8397918	PRJNA448333	47000	426326	220305033	12911	3046
SRR8397919	PRJNA448333	60446	373962	211666257	5547	6895
SRR8397920	PRJNA448333	52908	385873	185880728	5734	5586
SRR8397921	PRJNA448333	53624	278501	168257526	4362	7104
SRR8397922	PRJNA448333	39244	447340	143316383	6223	3860
SRR8397923	PRJNA448333	69873	350743	246842824	5509	7905
SRR8397924	PRJNA448333	50805	350660	213954493	8763	4331
SRR8397925	PRJNA448333	40064	505975	184956275	10604	3074
SRR8397926	PRJNA448333	55828	441989	210103697	6757	5242
SRR8397927	PRJNA448333	34550	379269	139063594	7837	3030
SRR8404214	PRJNA448333	96072	580738	324483058	5346	10715
SRR7686592	PRJNA485488	7615	109489	14666188	1845	1901
SRR7686593	PRJNA485488	34271	130166	71693796	2111	7673
SRR7686594	PRJNA485488	2184	17210	3421947	1455	710
SRR7686595	PRJNA485488	12364	36124	20767975	1628	3913
SRR7686596	PRJNA485488	28840	44288	54583448	1868	7824
SRR7686597	PRJNA485488	94652	156297	205087926	2245	20710
SRR7686598	PRJNA485488	31112	79331	58453813	1870	8632
SRR7686599	PRJNA485488	125242	169482	276637459	2364	28175
SRR7686600	PRJNA485488	102391	123240	205781208	2030	25967
SRR7686601	PRJNA485488	92126	97125	188880897	2081	22488
SRR7686602	PRJNA485488	20232	128691	40788107	1990	4933
SRR7686603	PRJNA485488	16077	88239	30055395	1777	4177
SRR7686604	PRJNA485488	72036	85943	134631178	1822	19643
SRR7686605	PRJNA485488	11103	47394	21966771	1996	2871
SRR7702748	PRJNA486341	25260	172585	66196526	3136	4325
SRR7702749	PRJNA486341	20088	168394	38383621	1804	4976
SRR7702750	PRJNA486341	12381	124317	22465352	1653	3245
SRR7702751	PRJNA486341	53189	137391	94890301	1721	15613
SRR7702752	PRJNA486341	20129	128133	31871029	1484	6646
SRR7702753	PRJNA486341	21390	247212	39467209	1758	5831
SRR7702754	PRJNA486341	20749	293768	41849124	1973	5005
SRR7702755	PRJNA486341	63092	196498	142086771	2374	13363
SRR7702756	PRJNA486341	17040	42187	31017371	1743	4722
SRR7702757	PRJNA486341	21510	99467	45124152	2131	4824
SRR7702758	PRJNA486341	15473	44837	27681186	1717	4447
SRR7702759	PRJNA486341	14006	40015	23880982	1599	4188
SRR8387714	PRJNA512570	279834	574446	840909763	3974	36382
SRR8387715	PRJNA512570	236674	418567	797865907	5464	22983
SRR8387716	PRJNA512570	280614		525666	4114	33200
SRR8387717	PRJNA512570	292922	539193	985005474	5224	31002
SRR8387718	PRJNA512570	261577	610440	787557922	4054	31105
SRR8387719	PRJNA512570	316956	568582	851937499	3199	46638
SRR8387720	PRJNA512570	280306	919996	775311816	3466	38904
SRR8387721	PRJNA512570	284889	470158	795283985	3495	40415
SRR094166	PRJNA60251	21434	43883	35656514	1620	6983
SRR094403	PRJNA60251	20119	31022	32903651	1585	6670
SRR094405	PRJNA60251	20328	36994	33641925	1614	6659
SRR094415	PRJNA60251	19860	90483	33227466	1629	6413
SRR094416	PRJNA60251	20764	39159	34312811	1601	6787
SRR094417	PRJNA60251	23218	38504	38851158	1628	7497
SRR094418	PRJNA60251	21189	39667	35177431	1620	6911
SRR094419	PRJNA60251	0	0	0	0	0
SRR094424	PRJNA60251	87500	272027	162261393	1779	23681
SRR094427	PRJNA60251	0	0	0	0	0
SRR094428	PRJNA60251	77298	437993	144514887	1803	20926
SRR094437	PRJNA60251	779704	452486	2134312100	3367	132419
SRR094926	PRJNA60251	894494	438388	2491836583	3483	148853
ABCN1	PRJNA656389	114903	188909	240845334	2128	26178
ABCN10	PRJNA656389	103416	167166	210165392	2065	25724
ABCN11	PRJNA656389	99593	152233	203413106	2056	23600
ABCN12	PRJNA656389	126817	284823	262122863	2074	29492
ABCN13	PRJNA656389	129335	202925	274120429	2156	28938
ABCN14	PRJNA656389	135615	494993	303555072	2348	28024
ABCN15	PRJNA656389	144888	175473	317488308	2279	31299
ABCN16	PRJNA656389	129207	172369	273724834	2153	29010
ABCN17	PRJNA656389	113401	149010	211071545	1813	30982
ABCN18	PRJNA656389	146512	163271	276750769	1847	39117
ABCN19	PRJNA656389	143215	372402	277085374	1899	37074
ABCN2	PRJNA656389	108683	155583	227365445	2109	24775
ABCN20	PRJNA656389	143766	256322	297053716	2077	33386
ABCN21	PRJNA656389	181369	237813	359578151	1969	46022
ABCN22	PRJNA656389	128943	238255	249640243	1893	33052
ABCN23	PRJNA656389	146282	318394	293226660	1979	35851
ABCN24	PRJNA656389	144094	239294	290904906	2034	35722
ABCN25	PRJNA656389	155499	143257	308545062	1977	39180
ABCN26	PRJNA656389	91303	122368	205395765	2424	18260
ABCN27	PRJNA656389	152687	160547	313290863	2088	37596
ABCN28	PRJNA656389	138752	241887	341165640	2766	23757
ABCN29	PRJNA656389	125178	347240	291569112	2502	23158
ABCN3	PRJNA656389	148808	520130	341624424	2450	30109
ABCN30	PRJNA656389	142524	237584	306547950	2193	31368
ABCN31	PRJNA656389	80226	205902	172786197	2171	16372
ABCN32	PRJNA656389	138208	195154	270137990	1928	35103
ABCN33	PRJNA656389	101722	142100	189601708	1782	27028
ABCN4	PRJNA656389	124097	169137	290553859	2540	22638
ABCN5	PRJNA656389	101709	203114	204698967	1994	24544
ABCN6	PRJNA656389	141708	162460	290558813	2059	33773
ABCN7	PRJNA656389	78402	141825	167010529	2157	16819
ABCN8	PRJNA656389	108537	127888	209644580	1884	27755
ABCN9	PRJNA656389	102688	147696	236845948	2503	20636
ABDN1	PRJNA656389	27370	275630	64100979	2515	5291
ABGD10	PRJNA656389	133553	189414	264813459	1961	33226
ABGD11	PRJNA656389	133227	203740	340002119	2964	21721
ABGD2	PRJNA656389	148616	296910	357310651	2631	27162
ABGD3	PRJNA656389	170693	311264	343885965	1998	41302
ABGD4	PRJNA656389	162300	225604	326216706	2004	40439
ABGD5	PRJNA656389	112684	257722	225822693	1989	27299
ABGD6	PRJNA656389	84477	498882	167794436	1935	20258
ABGD7	PRJNA656389	126795	187765	248880584	1942	32472
ABGD8	PRJNA656389	118263	199263	246656200	2127	27459
ABGD9	PRJNA656389	112736	207872	223908963	1947	27806
BLJ1	PRJNA656389	197923	260995	426936097	2216	44558
BLJ10	PRJNA656389	158918	283366	370783066	2527	31517
BLJ11	PRJNA656389	160547	383636	334282400	2089	37259
BLJ12	PRJNA656389	164854	247788	355442699	2227	36990
BLJ13	PRJNA656389	156547	238972	317558779	2018	37740
BLJ14	PRJNA656389	185560	173182	372424032	1996	45763
BLJ15	PRJNA656389	159056	219832	339338943	2215	36700
BLJ16	PRJNA656389	133705	226461	301071184	2391	27953
BLJ17	PRJNA656389	170429	221074	336241808	1954	43066
BLJ18	PRJNA656389	164060	173662	348733161	2173	37117
BLJ19	PRJNA656389	165503	146692	332264303	2011	41367
BLJ20	PRJNA656389	110224	80599	202126547	1785	31042
BLJ21	PRJNA656389	147304	242267	305583318	2092	34859
BLJ22	PRJNA656389	158512	166144	344985428	2275	35781
BLJ23	PRJNA656389	175397	208727	380480742	2255	38789
BLJ24	PRJNA656389	181905	268858	394910850	2253	40385
BLJ25	PRJNA656389	147041	174469	308043286	2138	34670
BLJ26	PRJNA656389	131630	226930	264160592	1987	31891
BLJ27	PRJNA656389	150722	173174	321709746	2189	33803
BLJ28	PRJNA656389	119118	457952	252657333	2158	26891
BLJ29	PRJNA656389	136726	198362	275073690	2019	33920
BLJ30	PRJNA656389	136461	230247	307266827	2394	27880
BLJ31	PRJNA656389	153367	299385	304470593	1962	38596
BLJ32	PRJNA656389	121510	228712	267007208	2296	26305
BLJ33	PRJNA656389	191440	202180	398590046	2108	44909
BLJ35	PRJNA656389	103064	419457	254997357	2754	17109
BLJ5	PRJNA656389	143706	283366	332905207	2494	29074
BLJ6	PRJNA656389	147708	287885	326284280	2325	32175
BLJ7	PRJNA656389	133497	167586	304616324	2488	28091
BLJ8	PRJNA656389	161217	186359	348031046	2235	35876
BLJ9	PRJNA656389	147885	162129	300435133	2047	36345
FGD1_S1_L003	PRJNA656389	137237	257763	307070948	2377	29223
FGD10_S137_L002	PRJNA656389	128500	228093	272307703	2127	28571
FGD11_S138_L002	PRJNA656389	125421	491514	281833996	2345	25211
FGD12_S139_L002	PRJNA656389	146828	257686	343440813	2531	28587
FGD13_S140_L002	PRJNA656389	131165	295014	294145712	2334	26939
FGD14_S141_L002	PRJNA656389	113390	181289	222863192	1905	27700
FGD2_S2_L003	PRJNA656389	113614	482456	235523108	2046	25385
FGD3_S3_L003	PRJNA656389	114236	305068	235651651	2084	27109
FGD4_S4_L003	PRJNA656389	144912	217404	306117410	2160	33759
FGD5_S5_L003	PRJNA656389	114141	136875	222367924	1903	28870
FGD6_S6_L003	PRJNA656389	121741	379617	294384855	2633	21192
FGD7_S7_L003	PRJNA656389	138048	308372	312512696	2381	27544
FGD8_S8_L003	PRJNA656389	137494	285057	342398470	2788	23661
FGD9_S9_L003	PRJNA656389	129180	444213	320575266	2804	22076
GBCM1_S175_L002	PRJNA656389	94549	222853	188593255	1944	22454
GBCM10_S177_L002	PRJNA656389	103619	188004	194934115	1827	27624
GBCM11_S172_L002	PRJNA656389	110708	98712	203051475	1766	30613
GBCM2_S178_L002	PRJNA656389	73897	456833	187289148	2872	9953
GBCM3_S170_L002	PRJNA656389	112956	346649	237630663	2106	24524
GBCM4_S168_L002	PRJNA656389	108011	71130	190213014	1693	31847
GBCM5_S173_L002	PRJNA656389	119351	226077	219342458	1771	33004
GBCM6_S174_L002	PRJNA656389	109927	389207	214500994	1929	28048
GBCM7_S176_L002	PRJNA656389	128447	183338	272187504	2172	29309
GBCM8_S171_L002	PRJNA656389	100519	253850	194906469	1854	24919
GBCM9_S169_L002	PRJNA656389	114650	131403	210833886	1788	32090
GBS1_S179_L002	PRJNA656389	45799	643319	192098637	9767	3186
GBS2_S180_L002	PRJNA656389	61711	759877	261172520	10437	3880
GBS3_S181_L002	PRJNA656389	65363	759562	255298685	8832	4525
GBS4_S182_L002	PRJNA656389	86302	772350	302356536	5908	7530
GFB1	PRJNA656389	509860	498725	290519129	1406	37522
GFL1	PRJNA656389	976743	247844	504334472	1125	99331
GFW1	PRJNA656389	901129	211964	468627392	1159	89532
HCN1	PRJNA656389	1282065	147162	549295804	994	138067
HCN10	PRJNA656389	1086591	245457	589126766	1228	106007
HCN11	PRJNA656389	1290571	248836	504177470	905	146172
HCN12	PRJNA656389	134157	227058	286784113	2167	29794
HCN13	PRJNA656389	1125885	163733	550098246	1078	119827
HCN14	PRJNA656389	1000263	379861	547824371	1246	97258
HCN15	PRJNA656389	162111	324361	351488019	2254	36587
HCN17	PRJNA656389	124233	329909	283657227	2456	25472
HCN18	PRJNA656389	140359	249958	310989725	2315	30156
HCN19	PRJNA656389	123199	199628	290899424	2580	23835
HCN2	PRJNA656389	145019	216233	308967186	2177	32589
HCN20	PRJNA656389	153344	291307	384848071	2882	27119
HCN21	PRJNA656389	111095	240498	240750006	2210	23972
HCN22	PRJNA656389	151960	186441	305951134	2033	37801
HCN23	PRJNA656389	103259	188213	189590079	1753	28387
HCN24	PRJNA656389	136821	196844	270768328	1948	34157
HCN25	PRJNA656389	112573	183079	239731262	2201	25788
HCN26	PRJNA656389	108552	97929	224082930	2087	25270
HCN27	PRJNA656389	143459	196381	299615303	2092	32401
HCN28	PRJNA656389	141075	149318	274614743	1908	36001
HCN29	PRJNA656389	143174	307536	308251796	2216	30936
HCN3	PRJNA656389	193234	244275	426149412	2298	41516
HCN30	PRJNA656389	124682	289837	249891729	2014	31277
HCN31	PRJNA656389	136823	248548	294594132	2197	29563
HCN4	PRJNA656389	133217	233279	283370466	2182	30051
HCN5	PRJNA656389	175661	253099	393636023	2367	37147
HCN6	PRJNA656389	161169	520067	348775446	2210	34761
HCN7	PRJNA656389	138945	356345	344729475	2804	24277
HCN8	PRJNA656389	140600	267686	310121910	2309	30433
HCN9	PRJNA656389	179626	264683	440627058	2781	33585
HDN1	PRJNA656389	122416	612486	386347727	4604	13084
HDN10	PRJNA656389	50464	411485	197706708	7931	4411
HDN2	PRJNA656389	124179	728883	402833017	4985	12713
HDN3	PRJNA656389	133085	608929	428799146	4885	13904
HDN4	PRJNA656389	99437	669445	356059210	6589	8472
HDN5	PRJNA656389	107917	952981	370144146	5951	10098
HDN6	PRJNA656389	107679	477311	309518368	3714	13418
HDN7	PRJNA656389	121861	427578	343015350	3514	16062
HDN8	PRJNA656389	33365	530498	167191023	17235	1819
HDN9	PRJNA656389	35334	530470	197439383	20297	1783
KCN10	PRJNA656389	78751	141351	140419351	1710	22555
KCN11	PRJNA656389	196378	339692	475419476	2656	34341
KCN12	PRJNA656389	99438	266842	197389110	1907	23735
KCN13	PRJNA656389	122086	153081	264488207	2256	27897
KCN14	PRJNA656389	75731	430669	158988887	2086	16418
KCN15	PRJNA656389	88341	166427	167848965	1857	23327
KCN16	PRJNA656389	105260	214147	216194988	2066	24732
KCN17	PRJNA656389	124784	245345	264161158	2173	28652
KCN18	PRJNA656389	109519	224293	207691472	1813	28308
KCN19	PRJNA656389	132276	267202	286174301	2184	27711
KCN2	PRJNA656389	65127	167502	121754041	1749	16541
KCN20	PRJNA656389	114948	202802	234119759	2024	27204
KCN21	PRJNA656389	145090	318391	356391886	2773	27296
KCN22	PRJNA656389	112905	387125	222619671	1921	27867
KCN23	PRJNA656389	116660	150938	223318293	1839	29567
KCN25	PRJNA656389	211914	321074	425522328	2014	52991
KCN26	PRJNA656389	114383	184768	213436845	1773	30105
KCN27	PRJNA656389	93362	294667	181725610	1885	23461
KCN29	PRJNA656389	168778	331090	394324898	2507	32341
KCN3	PRJNA656389	79148	163815	148248174	1808	20984
KCN30	PRJNA656389	110331	353987	268063678	2707	20370
KCN31	PRJNA656389	154480	271251	340724042	2282	32794
KCN32	PRJNA656389	103239	366069	196365409	1834	26713
KCN33	PRJNA656389	121169	225886	230118741	1846	31745
KCN35	PRJNA656389	99275	157607	186777657	1810	26076
KCN4	PRJNA656389	64898	109053	121316377	1779	16932
KCN5	PRJNA656389	82658	147530	169509039	2087	19611
KCN6	PRJNA656389	181083	393269	473111959	3084	29905
KCN7	PRJNA656389	104465	100333	198129833	1843	27394
KCN8	PRJNA656389	113014	287288	247761235	2255	23435
KCN9	PRJNA656389	78606	127212	140463439	1695	22275
LCN1	PRJNA656389	1614	14693	2722593	1638	517
LCN10	PRJNA656389	141229	206956	333790274	2567	26332
LCN11	PRJNA656389	118389	275321	312894047	3102	18381
LCN12	PRJNA656389	140024	181803	311132695	2317	29395
LCN13	PRJNA656389	125585	371371	310421510	2818	21603
LCN14	PRJNA656389	109227	305383	259344029	2582	20218
LCN15	PRJNA656389	126167	290030	302318923	2618	22905
LCN16	PRJNA656389	2391	49585	4141333	1589	695
LCN17	PRJNA656389	169608	289206	398309193	2568	33319
LCN18	PRJNA656389	130880	519234	306559108	2509	24407
LCN19	PRJNA656389	115726	356743	279034570	2680	20934
LCN2	PRJNA656389	120776	272727	332890174	3393	17868
LCN20	PRJNA656389	121785	223359	293118404	2659	23150
LCN21	PRJNA656389	114366	440626	378008531	5239	11490
LCN22	PRJNA656389	80961	775601	297504973	6660	7058
LCN23	PRJNA656389	937	16384	1524564	1536	295
LCN24	PRJNA656389	94281	776762	338738081	6503	7523
LCN25	PRJNA656389	168590	343733	426425739	2894	27135
LCN3	PRJNA656389	2340	50750	3886349	1573	745
LCN4	PRJNA656389	775	19824	1292684	1536	233
LCN5	PRJNA656389	121165	305030	265927682	2266	25708
LCN6	PRJNA656389	98301	240877	209022264	2150	21539
LCN7	PRJNA656389	142982	199558	322485397	2419	30235
LCN8	PRJNA656389	143351	401019	337545884	2588	27286
LCN9	PRJNA656389	169606	385841	431025113	2922	27530
M1	PRJNA656389	9600	236473	44911405	11852	716
M10	PRJNA656389	66957	932449	228621770	5679	6853
M11	PRJNA656389	74634	504630	247026153	4834	9429
M12	PRJNA656389	121908	682281	387553427	4606	14676
M14	PRJNA656389	124618	555973	362235376	3792	17542
M15	PRJNA656389	96552	690248	283184079	3978	12013
M16	PRJNA656389	67710	143605	151633226	2374	14569
M18	PRJNA656389	87764	475089	260463408	4078	10189
M2	PRJNA656389	34625	559709	193791375	19376	1895
M3	PRJNA656389	35251	361610	185541890	14700	2482
M5	PRJNA656389	79711	382655	235807705	4128	10529
M6	PRJNA656389	133550	374571	363239512	3390	20041
M7	PRJNA656389	99874	720748	304803612	4188	12137
M8	PRJNA656389	115124	540572	344525839	4103	14226
M9	PRJNA656389	114704	531265	330717621	3773	14661
MCN10	PRJNA656389	147515	215109	295233845	1993	36442
MCN11	PRJNA656389	82905	239724	163742334	1901	19879
MCN12	PRJNA656389	122871	529058	265306475	2205	26427
MCN13	PRJNA656389	123323	402568	275877642	2329	25681
MCN14	PRJNA656389	144210	210384	294748229	2038	34737
MCN15	PRJNA656389	119524	223341	244191828	2014	27613
MCN16	PRJNA656389	177746	303171	394008605	2301	37081
MCN17	PRJNA656389	128201	239013	270917077	2107	28025
MCN18	PRJNA656389	135392	237490	289744972	2171	29241
MCN19	PRJNA656389	145922	254100	309974875	2145	32171
MCN2	PRJNA656389	86682	185781	201529899	2547	16882
MCN20	PRJNA656389	113588	176484	253847863	2337	23092
MCN21	PRJNA656389	166164	276336	352250752	2177	38169
MCN22	PRJNA656389	182336	261114	406790814	2368	38868
MCN23	PRJNA656389	154569	463953	345406867	2351	32967
MCN24	PRJNA656389	153024	248411	347566597	2377	29865
MCN26	PRJNA656389	131619	194575	285380135	2225	28156
MCN27	PRJNA656389	162560	291963	375760926	2478	33070
MCN28	PRJNA656389	155334	182338	328010389	2150	35484
MCN29	PRJNA656389	148704	234668	327785188	2301	31191
MCN3	PRJNA656389	106497	213348	234492063	2259	21604
MCN30	PRJNA656389	161065	225703	354349354	2278	33929
MCN31	PRJNA656389	137153	539941	316885192	2459	26068
MCN32	PRJNA656389	162961	149870	344494955	2150	37259
MCN33	PRJNA656389	160121	224516	345948600	2241	35653
MCN35	PRJNA656389	112840	186045	222789990	1937	27931
MCN4	PRJNA656389	84493	311689	169585724	1945	19848
MCN5	PRJNA656389	156785	338975	322401001	2042	36307
MCN6	PRJNA656389	103803	314109	207286031	1950	24840
MCN7	PRJNA656389	95273	368939	212916108	2369	20171
MCN8	PRJNA656389	86525	367281	167999298	1897	21941
MGD1_S142_L002	PRJNA656389	131055	213111	298279028	2403	26165
MGD10_S151_L002	PRJNA656389	140262	451585	326334688	2519	27776
MGD11_S152_L002	PRJNA656389	122179	258414	288065593	2577	22942
MGD12_S153_L002	PRJNA656389	122210	251064	275303537	2385	24815
MGD2_S143_L002	PRJNA656389	121753	403493	273319793	2333	24459
MGD3_S144_L002	PRJNA656389	126754	356883	288176827	2366	24632
MGD4_S145_L002	PRJNA656389	121583	325573	274325743	2386	24563
MGD5_S146_L002	PRJNA656389	134202	219352	288915408	2226	30478
MGD6_S147_L002	PRJNA656389	128015	170127	276302210	2267	29177
MGD7_S148_L002	PRJNA656389	140878	217928	309782267	2284	30772
MGD8_S149_L002	PRJNA656389	131395	289119	298605117	2410	26562
MGD9_S150_L002	PRJNA656389	135572	436725	320503901	2595	26667
NB1	PRJNA656389	212041	877512	499365452	2503	37605
NB10	PRJNA656389	119463	296379	251549522	2120	26787
NB13	PRJNA656389	90616	336562	221676705	2768	16731
NB14	PRJNA656389	79436	505337	208752988	3045	11259
NB15	PRJNA656389	90100	346802	214092950	2522	15253
NB16	PRJNA656389	118957	211355	272534412	2423	23361
NB17	PRJNA656389	114252	361750	252126123	2274	23596
NB18	PRJNA656389	94369	419162	231112171	2780	16812
NB19	PRJNA656389	60184	180931	99826399	1552	18694
NB2	PRJNA656389	104486	149533	221177673	2127	22723
NB21	PRJNA656389	110322	385692	288470197	3108	16495
NB22	PRJNA656389	130296	346454	336884408	3071	21134
NB24	PRJNA656389	58401	211060	135727213	2396	9708
NB25	PRJNA656389	118794	235296	297761297	2821	19148
NB26	PRJNA656389	86279	308728	183628190	2177	19319
NB27	PRJNA656389	88734	262865	202706198	2430	17585
NB28	PRJNA656389	90640	175791	180748777	1980	22234
NB29	PRJNA656389	126704	370409	284983037	2409	26159
NB3	PRJNA656389	120144	428208	271372587	2350	23714
NB30	PRJNA656389	119213	160213	255782016	2211	26502
NB31	PRJNA656389	82436	278965	219100534	3257	11200
NB32	PRJNA656389	105079	212981	226118742	2224	23143
NB33	PRJNA656389	83184	378315	208710097	2940	14971
NB34	PRJNA656389	108418	442246	283360603	3081	16626
NB35	PRJNA656389	105756	206240	240951516	2374	19601
NB4	PRJNA656389	129672	419121	307407191	2593	23686
NB5	PRJNA656389	148933	357054	374371684	2868	24836
NB6	PRJNA656389	106627	278867	289187085	3440	14939
NB7	PRJNA656389	81751	521255	231008486	3668	11122
NB8	PRJNA656389	76748	381183	237887006	4533	9327
NB9	PRJNA656389	86956	224773	229311160	3168	13935
NJ1	PRJNA656389	12573	173868	25752108	1929	2639
NJ11	PRJNA656389	77943	97192	142985409	1752	21289
NJ12	PRJNA656389	61947	309574	151099857	2768	11411
NJ13	PRJNA656389	65991	248569	165498454	2886	10279
NJ14	PRJNA656389	11868	359516	43661568	6395	970
NJ15	PRJNA656389	80451	222727	185561844	2494	16282
NJ16	PRJNA656389	15252	78183	34732948	2464	3118
NJ17	PRJNA656389	57160	218703	144417219	2863	8994
NJ18	PRJNA656389	69738	353360	187963284	3248	9655
NJ19	PRJNA656389	28819	165234	56077622	1906	7504
NJ2	PRJNA656389	168670	353054	366634973	2230	36049
NJ21	PRJNA656389	51171	261193	128769394	2869	8421
NJ22	PRJNA656389	87022	241965	197799177	2328	16348
NJ24	PRJNA656389	55712	241294	131450596	2543	9745
NJ25	PRJNA656389	99843	290414	222148163	2337	20769
NJ26	PRJNA656389	4172	30594	7821644	1761	1071
NJ27	PRJNA656389	13353	194808	30006089	2231	2637
NJ28	PRJNA656389	7620	89926	19044884	3061	1270
NJ29	PRJNA656389	37500	229345	76397197	2012	8641
NJ30	PRJNA656389	29012	161369	72914702	2898	4421
NJ31	PRJNA656389	106450	266180	314861084	4018	14202
NJ32	PRJNA656389	87089	522037	217331802	2785	15226
NJ33	PRJNA656389	46885	541156	141043647	4179	5310
NJ34	PRJNA656389	6534	108746	12899424	1948	1607
NJ35	PRJNA656389	14806	72805	26802548	1803	4425
NJ4	PRJNA656389	16568	206008	35792084	2200	3633
NJ5	PRJNA656389	8701	166125	19757160	2396	1733
NJ6	PRJNA656389	18188	175568	41656959	2377	3261
NJ7	PRJNA656389	68448	290871	188093341	3588	9621
NJ9	PRJNA656389	68223	238893	170992449	2868	11670
NK1	PRJNA656389	1730	32837	3593816	2228	407
NK10	PRJNA656389	45786	347472	113666035	2782	7497
NK11	PRJNA656389	719	12914	1152961	1515	235
NK12	PRJNA656389	439	13809	712384	1487	136
NK13	PRJNA656389	620	17160	938222	1409	217
NK15	PRJNA656389	2209	66610	5487035	2944	405
NK17	PRJNA656389	1009	14242	2160545	2346	244
NK18	PRJNA656389	3875	58144	9327088	2739	757
NK2	PRJNA656389	868	17883	1886964	2403	207
NK21	PRJNA656389	1295	27552	2844659	2389	288
NK22	PRJNA656389	1214	24019	2647279	2340	280
NK26	PRJNA656389	627	18613	1040853	1604	202
NK29	PRJNA656389	487	16538	751241	1498	173
NK3	PRJNA656389	615	16338	1030173	1638	195
NK30	PRJNA656389	546	17325	951205	1646	163
NK32	PRJNA656389	3647	38137	7306348	2036	867
NK33	PRJNA656389	875	12937	1367297	1486	302
NK34	PRJNA656389	799	20529	1407235	1777	238
NK35	PRJNA656389	807	26554	1417576	1717	240
NK4	PRJNA656389	2626	52453	6155661	2491	487
NK5	PRJNA656389	7756	114750	17350997	2286	1510
NK6	PRJNA656389	5206	108074	10844325	1896	937
NK7	PRJNA656389	831	51130	1786649	2222	175
NK9	PRJNA656389	1133	26708	2467565	2411	268
NL1	PRJNA656389	605182	650033	1587803777	3123	95829
NL10	PRJNA656389	114098	223973	241349886	2186	26944
NL12	PRJNA656389	152344	466142	347486213	2411	30177
NL13	PRJNA656389	120738	431136	304012890	2911	20060
NL14	PRJNA656389	106697	438870	287185501	3304	15092
NL15	PRJNA656389	97962	394178	261373334	3301	15081
NL16	PRJNA656389	121226	234179	262017189	2226	26519
NL17	PRJNA656389	121861	176618	246930679	2021	29694
NL18	PRJNA656389	101360	418930	239354106	2599	19515
NL19	PRJNA656389	108985	310303	195315989	1741	31607
NL2	PRJNA656389	386	32518	867707	2499	79
NL21	PRJNA656389	125453	394016	324914247	3053	19973
NL22	PRJNA656389	115681	497132	298614175	2957	17828
NL24	PRJNA656389	102315	249272	239290659	2529	18144
NL25	PRJNA656389	105311	414621	279995209	3193	14899
NL26	PRJNA656389	117573	419724	242976491	2020	25528
NL27	PRJNA656389	135402	504391	336785158	2827	22974
NL28	PRJNA656389	119906	339570	235445028	1921	30024
NL29	PRJNA656389	10825	420516	22444539	1999	2306
NL3	PRJNA656389	140912	820206	313014120	2300	28628
NL31	PRJNA656389	113216	265748	311557287	3364	15761
NL32	PRJNA656389	109443	336637	206626835	1806	28453
NL33	PRJNA656389	103109	418312	252779491	2736	17470
NL34	PRJNA656389	92776	314097	221522150	2624	17031
NL35	PRJNA656389	117605	240330	265428341	2332	22030
NL4	PRJNA656389	125007	263072	306531207	2742	21148
NL5	PRJNA656389	137597	390231	305378957	2287	27412
NL7	PRJNA656389	130893	436655	321041380	2733	22598
NL8	PRJNA656389	88334	353186	231575068	3213	14127
NL9	PRJNA656389	91537	304665	241958462	3080	13399
NM1	PRJNA656389	15495	138956	31967605	1970	3356
NM10	PRJNA656389	38639	185123	86513933	2354	7829
NM12	PRJNA656389	19027	122178	42877035	2395	3861
NM14	PRJNA656389	8319	124038	27264934	4873	1026
NM15	PRJNA656389	127373	367470	344727864	3385	17726
NM16	PRJNA656389	7107	52403	15944702	2443	1468
NM17	PRJNA656389	81454	224232	206743112	2914	12581
NM18	PRJNA656389	69293	425763	196048140	3581	8826
NM19	PRJNA656389	45771	162282	90181117	1933	11509
NM2	PRJNA656389	95737	339383	236717211	2753	15694
NM21	PRJNA656389	47657	305577	116840166	2723	8120
NM22	PRJNA656389	65421	217341	154181888	2535	11092
NM24	PRJNA656389	82425	220440	203429537	2786	13706
NM25	PRJNA656389	110707	323658	271322481	2723	18744
NM26	PRJNA656389	31790	165684	75512940	2620	5550
NM27	PRJNA656389	59426	362211	193737812	5146	5705
NM28	PRJNA656389	94379	164180	210566576	2344	19292
NM29	PRJNA656389	79241	269922	167172528	2154	17736
NM3	PRJNA656389	113879	317885	266286853	2497	20994
NM30	PRJNA656389	5061	120904	12325546	2961	985
NM31	PRJNA656389	114859	281609	341210886	4001	15192
NM32	PRJNA656389	6305	42280	12556030	2096	1790
NM33	PRJNA656389	35151	388220	97186727	3614	4365
NM34	PRJNA656389	10111	190131	24836207	2805	1731
NM35	PRJNA656389	21859	99669	45187203	2164	5300
NM4	PRJNA656389	110245	380533	322650751	3853	14460
NM5	PRJNA656389	73245	447762	165380450	2372	14443
NM6	PRJNA656389	94202	191818	240118809	2925	14816
NM7	PRJNA656389	80837	485901	224460347	3651	10442
NM8	PRJNA656389	81489	216578	215503929	3210	13019
NM9	PRJNA656389	23190	188593	53553838	2464	4506
NW10	PRJNA656389	151168	314879	358875818	2620	30136
NW12	PRJNA656389	131920	456153	322940828	2694	22847
NW13	PRJNA656389	97563	266168	238108558	2756	17896
NW15	PRJNA656389	112106	253071	308364768	3480	15904
NW16	PRJNA656389	143440	296292	308135896	2191	31695
NW18	PRJNA656389	50479	151941	112237922	2316	9672
NW19	PRJNA656389	66625	293966	104783109	1490	22527
NW2	PRJNA656389	419	29176	1058899	3388	65
NW21	PRJNA656389	130675	419630	324658921	2804	22515
NW24	PRJNA656389	108685	316829	253913793	2533	19895
NW25	PRJNA656389	96997	610808	256366944	3175	14248
NW26	PRJNA656389	96890	214347	193150152	1945	22576
NW27	PRJNA656389	124917	236920	282427531	2416	25538
NW28	PRJNA656389	92686	188146	166447973	1715	26295
NW29	PRJNA656389	133256	427959	316042282	2586	25234
NW3	PRJNA656389	123359	333978	279216457	2370	23597
NW30	PRJNA656389	59119	353525	157982819	3260	8167
NW31	PRJNA656389	102061	286297	253084479	2789	17873
NW32	PRJNA656389	105419	267083	213020359	2004	25014
NW33	PRJNA656389	101059	447382	253005497	2819	15793
NW34	PRJNA656389	240668	369758	640421013	3192	36902
NW35	PRJNA656389	115970	241237	252723859	2227	23724
NW4	PRJNA656389	128662	315218	304649246	2581	23840
NW5	PRJNA656389	106376	308396	234441132	2251	21151
NW6	PRJNA656389	108025	416983	229461341	2143	23094
NW7	PRJNA656389	127728	438501	314915562	2748	21386
NW8	PRJNA656389	525	14043	876676	1617	163
NZ1	PRJNA656389	66624	718341	140187840	2040	13704
NZ10	PRJNA656389	97289	296358	208557162	2191	21507
NZ11	PRJNA656389	76977	190340	143506904	1796	20703
NZ15	PRJNA656389	113272	253101	291296617	3018	18913
NZ16	PRJNA656389	48645	260509	100559599	2067	10853
NZ18	PRJNA656389	107651	317800	259318427	2711	19838
NZ2	PRJNA656389	13829	36439	23346903	1621	4310
NZ21	PRJNA656389	126599	287217	290052910	2407	24761
NZ22	PRJNA656389	36875	110106	86069964	2546	7224
NZ24	PRJNA656389	48590	254208	112653124	2557	9094
NZ25	PRJNA656389	78944	255762	195834087	2792	13784
NZ26	PRJNA656389	66878	226586	111439147	1569	20817
NZ27	PRJNA656389	126806	353613	294427796	2507	24552
NZ29	PRJNA656389	1285	216413	2725095	2024	232
NZ3	PRJNA656389	64734	232153	126385904	1824	15198
NZ32	PRJNA656389	84035	353036	158448267	1804	21996
NZ33	PRJNA656389	51682	424647	121674047	2542	9798
NZ35	PRJNA656389	7528	63589	12850208	1642	2313
NZ4	PRJNA656389	70698	131543	129433686	1754	19339
NZ5	PRJNA656389	63162	343133	111726980	1675	18138
NZ6	PRJNA656389	47301	165994	92584055	1866	11193
NZ7	PRJNA656389	107206	266959	247335877	2479	21170
S-1_BDME192032754-1a	PRJNA656389	37201	439036	190998673	15986	1989
S-1_FDME192071053-1a	PRJNA656389	130485	78407	263765158	2056	32795
S-11_BDME192032764-1a	PRJNA656389	152096	367754	293386262	1862	38970
S-11-071_FDME192071055-1a	PRJNA656389	174990	253585	378426273	2220	39183
S-12_BDME192032765-1a	PRJNA656389	148219	347245	339377871	2447	29964
S-13_BDME192032766-1a	PRJNA656389	97173	244161	185811562	1868	25703
S-14_BDME192032767-1a	PRJNA656389	129580	263904	267775163	2078	30417
S-15_BDME192032768-1a	PRJNA656389	37206	414200	171852309	10849	2881
S-16_BDME192032769-1a	PRJNA656389	157494	306659	301544196	1894	42507
S-17_BDME192032770-1a	PRJNA656389	36112	217989	154873921	9115	3125
S-17-0037_FDME192071048-1a	PRJNA656389	181285	255068	366760718	2057	45389
S-18_BDME192032771-1a	PRJNA656389	52809	468079	214051776	10043	3270
S-18-0084_FDME192071051-1a	PRJNA656389	183911	117033	348780637	1878	49971
S-19_BDME192032772-1a	PRJNA656389	126559	191749	235273076	1770	33902
S-19-0086_FDME192071060-1a	PRJNA656389	28260	452361	152387077	17555	1648
S-2_BDME192032755-1a	PRJNA656389	43161	821052	231371906	19837	1795
S-20_BDME192032773-1a	PRJNA656389	25901	269677	138519204	13610	2090
S-20-0040_FDME192071062-1a	PRJNA656389	185502	204830	365588302	1972	47897
S-2-0033_FDME192071052-1a	PRJNA656389	89068	454580	202365399	2337	16948
S-21_BDME192032774-1a	PRJNA656389	39399	933736	170801907	13098	1912
S-21_FDME192071056-1a	PRJNA656389	28800	529793	141560012	12315	2243
S-21_FDME192071058-1a	PRJNA656389	101058	66110	184630533	1760	28111
S-22_BDME192032775-1a	PRJNA656389	45956	964619	181782033	8964	2721
S-22_FDME192071049-1a	PRJNA656389	155571	276513	310355451	1966	38501
S-23_BDME192032776-1a	PRJNA656389	64620	1043902	247912516	7660	3865
S-23_FDME192071050-1a	PRJNA656389	46166	424289	204450456	10486	3615
S-24_BDME192032777-1a	PRJNA656389	120912	206344	227417542	1854	33126
S-24_FDME192071042-1a	PRJNA656389	78268	674892	265580386	5940	6858
S-24-0082_FDME192071063-1a	PRJNA656389	149223	389075	291014256	1918	38186
S-25_BDME192032778-1a	PRJNA656389	54161	595870	202011025	6725	5498
S-25_FDME192071039-1a	PRJNA656389	121437	343192	224275254	1782	33668
S-26_BDME192032779-1a	PRJNA656389	85316	414911	251774628	3503	11399
S-26_FDME192071045-1a	PRJNA656389	98236	115139	180960507	1808	27677
S-27_BDME192032780-1a	PRJNA656389	136097	274964	242672712	1715	39473
S-28_BDME192032781-1a	PRJNA656389	69827	422139	254715147	7224	5597
S-28_FDME192071034-1a	PRJNA656389	118646	92908	207611728	1688	35473
S-29_BDME192032782-1a	PRJNA656389	91686	396490	286651223	4112	9288
S-29_FDME192071030-1a	PRJNA656389	118774	182672	231029350	1887	29975
S-3_BDME192032756-1a	PRJNA656389	127509	156703	240273499	1832	34342
S-30_BDME192032783-1a	PRJNA656389	119333	98626	211873011	1717	35151
S-31_BDME192032784-1a	PRJNA656389	136506	120485	270252071	1983	34703
S-32_BDME192032785-1a	PRJNA656389	118436	175703	219790434	1808	32857
S-33_BDME192032786-1a	PRJNA656389	122320	191668	245727406	2001	30168
S-34_BDME192032787-1a	PRJNA656389	69564	742780	262285975	7379	5158
S-35_FDME192071059-1a	PRJNA656389	114740	130656	210347921	1796	32658
S-36_BDME192032788-1a	PRJNA656389	121560	100086	238982948	1975	31673
S-37_BDME192032789-1a	PRJNA656389	115682	87399	213197907	1790	32466
S-38_BDME192032790-1a	PRJNA656389	131236	59086	241956164	1789	36333
S-39_BDME192032791-1a	PRJNA656389	132117	262130	268531570	2066	32923
S-4_BDME192032757-1a	PRJNA656389	107519	46899	200738275	1838	29924
S-4_FDME192071061-1a	PRJNA656389	111180	112976	229633277	2108	26809
S-40_BDME192032792-1a	PRJNA656389	115311	152826	215695163	1811	31603
S-41_BDME192032793-1a	PRJNA656389	87823	129436	164654074	1828	23866
S-42_BDME192032794-1a	PRJNA656389	93867	120886	172930798	1775	25683
S-43_BDME192032795-1a	PRJNA656389	105228	96838	188451918	1730	30441
S-44_BDME192032796-1a	PRJNA656389	94157	167906	164608171	1676	27860
S-45_BDME192032797-1a	PRJNA656389	97751	131763	165372357	1616	30307
S-46_BDME192032798-1a	PRJNA656389	61590	51901	97126700	1503	20843
S-47_BDME192032799-1a	PRJNA656389	82941	82121	137028109	1571	26343
S-48_BDME192032800-1a	PRJNA656389	124050	463878	281613589	2394	24502
S-49_BDME192032801-1a	PRJNA656389	72753	822047	271445913	6590	6594
S-5_BDME192032758-1a	PRJNA656389	62479	757011	223596082	5866	6381
S-50_BDME192032802-1a	PRJNA656389	74703	414329	237247268	4222	9071
S-5-0083_FDME192071057-1a	PRJNA656389	97611	74433	176870037	1746	27613
S-509_FDME192071031-1a	PRJNA656389	87665	598234	258100753	3656	11385
S-51_BDME192032803-1a	PRJNA656389	79468	620827	263343168	5291	7138
S-511_FDME192071032-1a	PRJNA656389	70365	380732	244277342	5920	6226
S-515_FDME192071036-1a	PRJNA656389	98055	268287	247770222	2690	17946
S-516_FDME192071037-1a	PRJNA656389	88411	338604	265570369	3869	10252
S-517_FDME192071046-1a	PRJNA656389	86009	641094	338666544	8596	6468
S-518_FDME192071038-1a	PRJNA656389	83751	134260	148027888	1712	24568
S-519_FDME192071040-1a	PRJNA656389	90718	734768	235676256	2848	13566
S-52_BDME192032804-1a	PRJNA656389	80746	606571	255611644	4308	8304
S-520_FDME192071044-1a	PRJNA656389	69562	513137	276431172	8497	4654
S-521_FDME192071035-1a	PRJNA656389	105126	183521	185612549	1714	31611
S-523_FDME192071043-1a	PRJNA656389	99818	271745	184957423	1784	27176
S-53_BDME192032805-1a	PRJNA656389	126966	63899	232169926	1779	35956
S-54_BDME192032806-1a	PRJNA656389	97431	44190	162833569	1582	30517
S-55_BDME192032807-1a	PRJNA656389	95310	76825	160604551	1588	29396
S-56_BDME192032808-1a	PRJNA656389	105003	72877	174715851	1588	33357
S-57_BDME192032809-1a	PRJNA656389	80812	112628	130540258	1534	26452
S-58_BDME192032810-1a	PRJNA656389	94614	323227	165429407	1688	28530
S-59_BDME192032811-1a	PRJNA656389	102040	116526	185391074	1723	28385
S-6_BDME192032759-1a	PRJNA656389	100088	85423	180932563	1754	28769
S-60_BDME192032812-1a	PRJNA656389	102298	61855	172399345	1594	31638
S-61_BDME192032813-1a	PRJNA656389	82727	71504	143340042	1639	24502
S-62_BDME192032814-1a	PRJNA656389	149699	171287	280076802	1807	40868
S-63_BDME192032815-1a	PRJNA656389	121134	281368	243990990	1977	29196
S-64_BDME192032816-1a	PRJNA656389	88732	933634	280935630	4287	8829
S-64_FDME192071033-1a	PRJNA656389	129786	228432	249353697	1881	34065
S-7_BDME192032760-1a	PRJNA656389	33127	805014	147738383	10845	2131
S-7-0038_FDME192071054-1a	PRJNA656389	48399	358566	193582427	7738	4439
S-75_FDME192071041-1a	PRJNA656389	141147	182116	293218218	2103	32842
S-8_BDME192032761-1a	PRJNA656389	30498	544969	134826291	9477	2550
S-8-0036_FDME192071065-1a	PRJNA656389	170608	226414	317253090	1824	47686
S-9_BDME192032762-1a	PRJNA656389	28056	480072	128780977	12806	1735
S-9-0039_FDME192071066-1a	PRJNA656389	63115	587388	197986397	4521	6656
S-97_FDME192071047-1a	PRJNA656389	137871	151662	270180175	1912	34865
SBCM1_S159_L002	PRJNA656389	90475	239679	176657716	1874	22046
SBCM10_S156_L002	PRJNA656389	92487	95161	173664183	1805	24480
SBCM11_S163_L002	PRJNA656389	106379	248542	214293001	2016	26300
SBCM12_S160_L002	PRJNA656389	113469	152294	214100571	1830	30422
SBCM13_S158_L002	PRJNA656389	113961	148659	215351594	1856	30639
SBCM14_S166_L002	PRJNA656389	102655	123477	207653910	2021	24600
SBCM2_S164_L002	PRJNA656389	119084	168076	219176262	1782	33035
SBCM3_S154_L002	PRJNA656389	108293	200341	221064328	1992	24609
SBCM4_S162_L002	PRJNA656389	117917	122338	227320016	1884	30379
SBCM5_S155_L002	PRJNA656389	117379	599174	255899811	2251	25064
SBCM6_S161_L002	PRJNA656389	101181	317781	195175355	1902	26467
SBCM7_S157_L002	PRJNA656389	97869	235291	193318112	1917	23789
SBCM8_S167_L002	PRJNA656389	88041	111857	156642593	1710	25409
SBCM9_S165_L002	PRJNA656389	105750	298074	201579547	1835	27176
SMS1	PRJNA656389	63297	288019	272040121	9961	4724
SMS10	PRJNA656389	48918	545943	194131659	7693	4517
SMS11	PRJNA656389	62704	188204	235747084	6688	6539
SMS12	PRJNA656389	44664	409624	184642439	8403	3500
SMS13	PRJNA656389	55214	375133	240425794	10015	4387
SMS14	PRJNA656389	51079	358571	215129419	10124	3627
SMS4	PRJNA656389	71739	412772	265370912	6401	6655
SMS5	PRJNA656389	77631	384390	289951367	7303	6258
SMS6	PRJNA656389	43826	726080	173834938	8084	3934
SMS7	PRJNA656389	63849	562461	275588103	8855	6154
SMS8	PRJNA656389	19709	256811	67806736	5556	2347
SMS9	PRJNA656389	61755	241350	234195390	7908	5165
SNS1	PRJNA656389	57347	303299	216586885	7038	4900
SNS10	PRJNA656389	25410	314262	86515460	5553	2647
SNS12	PRJNA656389	34368	464418	138348362	8707	2807
SNS14	PRJNA656389	18904	256782	81913826	9441	1645
SNS15	PRJNA656389	80877	432785	294253686	6422	7212
SNS2	PRJNA656389	80464	373393	298367348	6646	7149
SNS3	PRJNA656389	38313	365661	133133335	5792	4593
SNS4	PRJNA656389	70766	705663	261151759	6911	5265
SNS5	PRJNA656389	43724	427141	159979243	7085	3846
SNS6	PRJNA656389	60087	364027	192314441	4841	6957
SNS7	PRJNA656389	45162	289812	184355323	8263	3864
SNS8	PRJNA656389	23617	292466	98296280	9053	1705
SNS9	PRJNA656389	49798	354769	206102965	9843	3365
SZCM1	PRJNA656389	161838	360286	359903299	2327	34170
SZCM10	PRJNA656389	156683	249365	360947743	2471	32288
SZCM11	PRJNA656389	141174	620985	352992833	2850	25027
SZCM12	PRJNA656389	218506	285014	534307498	2748	41064
SZCM13	PRJNA656389	155952	324048	415829117	3248	24787
SZCM14	PRJNA656389	172518	203338	427320198	2851	32219
SZCM15	PRJNA656389	164267	183015	412149997	2920	29981
SZCM16	PRJNA656389	135269	228164	363285306	3269	21812
SZCM17	PRJNA656389	173714	472983	428067310	2748	30422
SZCM18	PRJNA656389	156719	176953	353434862	2392	32435
SZCM19	PRJNA656389	140022	259142	357491223	3000	24490
SZCM2	PRJNA656389	131229	490185	320943547	2727	23193
SZCM20	PRJNA656389	168315	206549	379387745	2398	35740
SZCM21	PRJNA656389	152098	182763	366232920	2675	30233
SZCM22	PRJNA656389	157561	167622	401308052	2972	27141
SZCM23	PRJNA656389	148004	210474	376932929	2949	26440
SZCM24	PRJNA656389	173881	294833	455981232	3111	28467
SZCM25	PRJNA656389	166075	306939	425749552	2937	26608
SZCM26	PRJNA656389	178901	194768	392817464	2273	38634
SZCM27	PRJNA656389	161395	370860	370993381	2442	32011
SZCM28	PRJNA656389	166177	155748	354153373	2174	37249
SZCM29	PRJNA656389	175325	221791	388929168	2337	38035
SZCM3	PRJNA656389	154078	297266	370324581	2646	27479
SZCM30	PRJNA656389	152507	195724	326121297	2163	32921
SZCM4	PRJNA656389	154397	215859	387060011	2875	28637
SZCM5	PRJNA656389	166668	375895	363318177	2253	36633
SZCM6	PRJNA656389	153008	273336	380316920	2792	26981
SZCM7	PRJNA656389	150264	211981	328523168	2247	32251
SZCM8	PRJNA656389	185643	303468	455031964	2753	35172
SZCM9	PRJNA656389	121536	416643	342139626	3648	16963
XBCN	PRJNA656389	107094	232407	222602338	2054	23674
XBCN1	PRJNA656389	138040	343183	324171530	2546	26258
XBCN10	PRJNA656389	167944	190263	356041886	2191	38624
XBCN11	PRJNA656389	162941	225966	370800285	2394	32491
XBCN12	PRJNA656389	115754	212047	267680633	2479	23193
XBCN13	PRJNA656389	139369	230741	314535272	2368	27786
XBCN14	PRJNA656389	520	33046	1028651	1873	114
XBCN15	PRJNA656389	186990	301921	417965354	2346	39065
XBCN16	PRJNA656389	129967	213171	297077910	2440	25577
XBCN17	PRJNA656389	141895	322507	311520529	2267	30078
XBCN18	PRJNA656389	90621	126657	182222319	1978	21825
XBCN19	PRJNA656389	162316	228124	341962414	2166	37441
XBCN2	PRJNA656389	130595	371313	297591943	2417	26147
XBCN20	PRJNA656389	520	29667	940790	1725	137
XBCN21	PRJNA656389	142983	238837	322734724	2352	28786
XBCN22	PRJNA656389	142630	167865	307835291	2201	30748
XBCN24	PRJNA656389	133211	205291	288699010	2226	28907
XBCN25	PRJNA656389	123181	185995	295118918	2669	24301
XBCN26	PRJNA656389	234	23952	432585	1698	55
XBCN27	PRJNA656389	572	18842	990119	1554	161
XBCN28	PRJNA656389	139018	211348	294459875	2163	31642
XBCN29	PRJNA656389	122942	193973	256888699	2096	28166
XBCN3	PRJNA656389	156004	295868	401392752	2968	25666
XBCN30	PRJNA656389	146885	153812	328305654	2358	30729
XBCN31	PRJNA656389	89908	284148	176406032	1884	21790
XBCN32	PRJNA656389	112450	161402	253173471	2396	23510
XBCN33	PRJNA656389	1984	22947	3729976	1937	565
XBCN34	PRJNA656389	103594	231966	238438151	2486	21263
XBCN35	PRJNA656389	121493	235618	284642081	2542	23017
XBCN5	PRJNA656389	170578	146793	378987324	2308	35627
XBCN6	PRJNA656389	118078	284233	248620330	2123	26255
XBCN7	PRJNA656389	121083	170828	251437145	2124	28818
XBCN8	PRJNA656389	292	46278	645298	2278	60
XBCN9	PRJNA656389	111924	260564	238545409	2143	24015
XBDN1	PRJNA656389	128340	240034	303736465	2623	25339
XBDN2	PRJNA656389	118095	340786	312565732	3186	17240
XBDN3	PRJNA656389	125811	195023	308627734	2721	22076
XBDN4	PRJNA656389	148684	239505	370705849	2884	26948
XBDN5	PRJNA656389	94093	296554	235597293	2866	16230
XBDN6	PRJNA656389	119159	395358	322777537	3250	16841
XBDN7	PRJNA656389	100765	307915	265898480	3165	16502
YCN10	PRJNA656389	2857	44323	4889195	1572	820
YCN11	PRJNA656389	96599	192472	193223875	1987	23571
YCN12	PRJNA656389	80664	463544	241158495	4174	9067
YCN14	PRJNA656389	88443	345969	219705883	2786	13744
YCN15	PRJNA656389	76316	586620	228549153	4278	8283
YCN16	PRJNA656389	97547	413188	231644117	2559	17051
YCN17	PRJNA656389	98641	186014	218843313	2301	19971
YCN18	PRJNA656389	104752	467894	272104255	3044	16088
YCN19	PRJNA656389	96958	242746	207617420	2149	20897
YCN20	PRJNA656389	136533	358544	301595589	2279	27502
YCN21	PRJNA656389	87678	194526	213760577	2771	15569
YCN22	PRJNA656389	61012	460759	172658915	3679	7826
YCN23	PRJNA656389	81371	449621	243881980	4275	9140
YCN24	PRJNA656389	272105	774976	787365258	3831	34664
YCN25	PRJNA656389	160137	790460	568334858	6148	15254
YCN26	PRJNA656389	141579	255042	343606551	2684	25291
YCN27	PRJNA656389	61447	281968	173250968	3721	7769
YCN28	PRJNA656389	94652	257835	229991839	2704	16097
YCN29	PRJNA656389	101510	442640	270064695	3197	15203
YCN30	PRJNA656389	177553	421779	646032847	6272	18031
YCN31	PRJNA656389	966037	556198	2794882606	3811	137220
YCN32	PRJNA656389	92512	287797	209548613	2396	18110
YCN33	PRJNA656389	113681	247342	277454937	2705	20058
YCN34	PRJNA656389	143530	272659	376104320	3100	22476
YCN35	PRJNA656389	82219	264922	223751545	3336	11397
YCN4	PRJNA656389	162780	330900	449308268	3440	24144
YCN5	PRJNA656389	86835	301014	194208297	2320	16526
YCN6	PRJNA656389	126803	250273	315689472	2827	21790
YCN7	PRJNA656389	160598	344516	360012793	2323	32738
YCN8	PRJNA656389	150137	316505	383516569	2952	24753
YCN9	PRJNA656389	99190	211977	224225340	2381	20032
SRR12529030	PRJNA657455	240048	625642	803196467	5507	20041
SRR12529031	PRJNA657455	186210	523678	603776888	5053	17322
SRR12529032	PRJNA657455	223530	561120	765389177	5653	21096
SRR12529033	PRJNA657455	239808	685834	779105100	5029	23876
SRR12529034	PRJNA657455	85883	661939	278585183	5088	8517
SRR12529035	PRJNA657455	94228	399112	316262411	5558	9284
SRR12529036	PRJNA657455	130544	722116	425618003	5025	14349
SRR12529037	PRJNA657455	184254	743993	653474112	6268	17090
SRR12529038	PRJNA657455	113826	548003	411083301	6746	9770
SRR12529039	PRJNA657455	157957	384883	488074938	4371	20864
SRR12529040	PRJNA657455	282461	310519	576107102	2068	69708
SRR12529041	PRJNA657455	144464	523182	480961484	5166	15292
SRR12529042	PRJNA657455	68799	389442	218103089	4603	7362
SRR12529043	PRJNA657455	145250	522278	480669476	4911	16878
SRR12529044	PRJNA657455	165850	369062	529003000	4781	17395
SRR12529045	PRJNA657455	131972	472298	463527389	6286	11856
SRR12529046	PRJNA657455	143850	722016	479334831	5236	15639
SRR12529047	PRJNA657455	171008	677154	528247070	4589	18394
SRR12529048	PRJNA657455	183559	894439	563091722	4530	18493
SRR12529049	PRJNA657455	8016	96364	13622067	1485	2182
SRR12529050	PRJNA657455	153672	710881	502569985	5867	13584
SRR12529051	PRJNA657455	325939	202833	693969877	2218	77464
SRR12529052	PRJNA657455	113030	493433	359988898	4717	13409
SRR12529053	PRJNA657455	180537	561859	592413764	4898	19510
SRR12529054	PRJNA657455	342840	545647	987516611	3759	43172
SRR12529055	PRJNA657455	140589	509797	402592468	3778	17317
SRR12529056	PRJNA657455	241959	426136	688446411	3658	33222
SRR12529057	PRJNA657455	251092	518917	701702648	3537	34053
SRR12529058	PRJNA657455	293840	449377	910369105	4416	31733
SRR12529059	PRJNA657455	310990	433996	946558236	4253	34577
SRR12529060	PRJNA657455	310524	501556	866925366	3504	42228
SRR12529061	PRJNA657455	265070	501825	828338326	4568	31221
SRR12529062	PRJNA657455	373804	389194	786064092	2152	86895
SRR12529063	PRJNA657455	345392	524155	984108176	3647	47752
SRR12529064	PRJNA657455	350538	510870	1008666431	3727	45682
SRR12529065	PRJNA657455	306885	449255	950250965	4391	33169
SRR12529066	PRJNA657455	281410	391057	844727953	4096	31187
SRR12529067	PRJNA657455	240409	569071	799817342	5371	21933
SRR12529068	PRJNA657455	312395	718672	969368135	4397	35321
SRR12529069	PRJNA657455	167329	438941	486090505	3868	21619
SRR12529070	PRJNA657455	258219	427487	820714732	4765	28664
SRR12529071	PRJNA657455	209910	636011	692586921	5329	20250
SRR12529072	PRJNA657455	287002	532549	944204404	5152	29447
SRR12529073	PRJNA657455	182138	203324	354861189	1948	48004
SRR12529074	PRJNA657455	856662	209083	1779843356	2132	209603
SRR12529075	PRJNA657455	880914	149359	1778477501	2056	226802
SRR12529076	PRJNA657455	832700	333819	1719772704	2123	206134
SRR12529077	PRJNA657455	879974	157342	1759453042	2017	226815
SRR12529078	PRJNA657455	846348	163212	1777711427	2172	203570
SRR12529079	PRJNA657455	908880	141087	1852751952	2084	229764
SRR12529080	PRJNA657455	528738	169558	1032880847	1949	140478
SRR12529081	PRJNA657455	480919	123596	886561297	1816	138040
SRR12529082	PRJNA657455	540653	177356	1032372728	1899	147350
SRR12529083	PRJNA657455	435855	145459	842918530	1932	117263
SRR12529084	PRJNA657455	237162	147130	442275015	1828	65737
SRR12529085	PRJNA657455	305102	84972	538195311	1720	92220
SRR12529086	PRJNA657455	338835	62396	590139846	1705	105158
SRR12529087	PRJNA657455	314660	342690	653701496	2122	75351
SRR12529088	PRJNA657455	289010	227519	594738026	2078	69539
SRR12529089	PRJNA657455	342302	422630	721116011	2150	79230
SRR12529090	PRJNA657455	391240	252924	886485670	2437	84537
SRR12529091	PRJNA657455	197366	561797	386090010	1934	50569
SRR12529092	PRJNA657455	317666	221288	647427566	2061	78017
SRR12529093	PRJNA657455	237368	186900	447916021	1845	64056
SRR12529094	PRJNA657455	341387	245010	677440482	1984	87167
SRR12529095	PRJNA657455	240115	147693	441611096	1792	67809
SRR12529096	PRJNA657455	307396	183572	590783966	1902	81942
SRR12529097	PRJNA657455	235821	180275	450655034	1868	62375
SRR12529098	PRJNA657455	313351	244091	632562922	2032	78274
SRR12529099	PRJNA657455	949775	420720	2409899701	2866	167172
SRR12529100	PRJNA657455	965269	476478	2417121271	2796	175587
SRR12529101	PRJNA657455	1102112	426576	2362027963	2224	257859
SRR12529102	PRJNA657455	907869	629390	2346690215	2940	160162
SRR12529103	PRJNA657455	1028838	422027	2321575774	2390	224692
SRR12529104	PRJNA657455	302095	387700	728169160	2688	55513
SRR12529105	PRJNA657455	308791	307376	717100328	2479	60468
SRR12529106	PRJNA657455	455277	279461	898702600	1966	117406
SRR12529107	PRJNA657455	449234	473999	1046604317	2461	91131
SRR12529108	PRJNA657455	473451	425813	959688045	2030	117935
SRR12529109	PRJNA657455	457901	125314	917695999	2033	117625
SRR12529110	PRJNA657455	304575	347882	682805682	2341	60984
SRR12529111	PRJNA657455	273511	375642	603904312	2289	56477
SRR12529112	PRJNA657455	226323	276180	476589034	2129	51529
SRR12529113	PRJNA657455	147822	316312	337812353	2383	29321
SRR12529114	PRJNA657455	325001	269184	742618899	2429	63709
SRR12529115	PRJNA657455	379781	474914	946601872	2822	66528
SRR12529116	PRJNA657455	369827	406525	953096710	3024	63465
SRR12529117	PRJNA657455	549818	297054	1166077756	2187	128594
SRR12529118	PRJNA657455	362301	537128	1025122068	3651	52276
SRR12529119	PRJNA657455	437992	387408	973140365	2353	96815
SRR12529120	PRJNA657455	121030	305069	240424498	1982	29451
SRR12529121	PRJNA657455	169206	418836	427488218	2897	28083
SRR12529122	PRJNA657455	24755	29432	72104810	3748	5606
SRR12529123	PRJNA657455	24072	43206	40715091	1673	7907
SRR12529124	PRJNA657455	27356	37607	68999042	3018	6880
SRR12529125	PRJNA657455	28328	43203	71826088	3061	7163
SRR12529126	PRJNA657455	32441	58464	54937898	1623	10035
SRR12529127	PRJNA657455	24467	40896	73797624	3988	5464
SRR12529128	PRJNA657455	24839	39316	72054880	3738	5753
SRR12529129	PRJNA657455	24771	34839	73996954	3921	5575
SRR12529130	PRJNA657455	23276	31518	74346058	4372	4965
SRR12529131	PRJNA657455	20869	86218	29929224	1288	7416
SRR12529132	PRJNA657455	1098	16464	1623166	1329	379
SRR12529133	PRJNA657455	22440	32007	36639935	1629	7831
SRR12529134	PRJNA657455	121950	173172	292146161	2676	23357
SRR12529135	PRJNA657455	22941	28609	37601751	1638	7950
SRR12529136	PRJNA657455	145134	421983	349978752	2679	26210
SRR12529137	PRJNA657455	183223	167479	396713494	2239	39434
SRR12529138	PRJNA657455	145015	264199	298308276	2070	33688
SRR12529139	PRJNA657455	223101	276179	465984115	2101	51026
SRR12529140	PRJNA657455	183343	365885	427565102	2529	34599
SRR12529141	PRJNA657455	28009	17753	54834017	2079	8469
SRR12529142	PRJNA657455	5919	65633	12270530	2198	1495
SRR12529143	PRJNA657455	223626	393601	509594105	2430	44269
SRR12529144	PRJNA657455	131749	375642	280028742	2144	28645
SRR12529145	PRJNA657455	253414	231512	531674781	2137	58831
SRR12529146	PRJNA657455	233170	365883	538383991	2483	44759
SRR12529147	PRJNA657455	227850	560108	506686282	2333	46871
SRR12529148	PRJNA657455	132576	480354	276870016	2045	29166
SRR12529149	PRJNA657455	36880	112466	71337732	1938	10277
SRR12529150	PRJNA657455	410063	250439	815175648	2006	105914
SRR12529151	PRJNA657455	199358	380068	501186386	2907	34295
SRR12529152	PRJNA657455	324916	422328	676843164	2116	75863
SRR12529153	PRJNA657455	12633	34073	16446087	1199	5027
SRR12529154	PRJNA657455	228666	383127	806789223	5240	22517
SRR12529155	PRJNA657455	161718	414077	521367471	4386	18952
SRR12529156	PRJNA657455	243166	326372	706227308	3458	36980
SRR12529157	PRJNA657455	262867	572459	803559294	3791	37174
SRR12529158	PRJNA657455	227419	412629	717895972	4118	27596
SRR12529159	PRJNA657455	153074	386763	534543040	5454	14057
SRR12529160	PRJNA657455	109177	344702	362435801	4515	13183
SRR12529161	PRJNA657455	159691	338796	459522898	3443	22164
SRR12529162	PRJNA657455	156502	274769	494526327	4265	17894
SRR12529163	PRJNA657455	147872	415795	455454093	3940	18551
SRR12529164	PRJNA657455	685718	295898	1374145359	2013	174789
SRR12529165	PRJNA657455	200179	604766	728879219	7290	15820
SRR12529166	PRJNA657455	133469	772812	583686206	12223	7198
SRR12529167	PRJNA657455	209542	546123	711917706	5724	19550
SRR12529168	PRJNA657455	222540	415290	753913321	5844	20044
SRR12529169	PRJNA657455	160814	667887	603932844	7726	11762
SRR12529170	PRJNA657455	80529	385748	374005208	14509	4540
SRR12529171	PRJNA657455	87567	413374	338155734	7611	7184
SRR12529172	PRJNA657455	137061	323645	453732807	4987	14340
SRR12529173	PRJNA657455	159361	409921	531854520	4905	16234
SRR12529174	PRJNA657455	100856	411269	387045735	8303	6760
SRR12529175	PRJNA657455	261975	988360	598289403	2443	54799
SRR12529176	PRJNA657455	107693	84346	192163745	1726	31506
SRR12529177	PRJNA657455	14549	134502	31192476	2130	3117
SRR12529178	PRJNA657455	5075	38570	9109331	1729	1475
SRR12529179	PRJNA657455	11702	51005	22899468	1963	3044
SRR12529180	PRJNA657455	21111	312862	59687707	3779	2478
SRR12529181	PRJNA657455	12868	94734	27985794	2307	2840
SRR12529182	PRJNA657455	1853	46692	4054858	2371	456
SRR12529183	PRJNA657455	22875	233762	64061587	3754	3294
SRR12529184	PRJNA657455	49795	333381	145471238	4031	6888
SRR12529185	PRJNA657455	51842	376398	139155072	3309	7905
SRR12529186	PRJNA657455	18509	146827	42404715	2468	3775
SRR12529187	PRJNA657455	611	20328	1019824	1529	182
SRR12529188	PRJNA657455	11890	130582	22902653	1873	3082
SRR12529189	PRJNA657455	7199	89120	12410980	1652	2157
SRR12529190	PRJNA657455	7632	56047	13469990	1700	2217
SRR12529191	PRJNA657455	15037	214704	44025673	4097	1924
SRR12529192	PRJNA657455	6028	83976	10443165	1673	1810
SRR12529193	PRJNA657455	183232	420364	661632311	6445	15866
SRR12529194	PRJNA657455	139593	772800	591874453	11183	7797
SRR12529195	PRJNA657455	200972	545781	601265975	4191	23761
SRR12529196	PRJNA657455	198845	405168	681991496	6091	17787
SRR12529197	PRJNA657455	62363	772728	250258070	8621	4245
SRR12529198	PRJNA657455	2811	20704	4069926	1305	977
SRR12529199	PRJNA657455	191872	352649	633707242	5267	18151
SRR12529200	PRJNA657455	110472	772824	466367927	10619	6553
SRR12529201	PRJNA657455	261789	540892	839833023	4825	27868
SRR12529202	PRJNA657455	216331	502414	741740181	5877	19638
SRR12529203	PRJNA657455	152119	772824	617954542	9403	9457
SRR12529204	PRJNA657455	96428	398156	407216883	10368	6469
SRR12529205	PRJNA657455	114764	414077	382763680	4708	13513
SRR12529206	PRJNA657455	130719	388569	439795782	5786	11787
SRR12529207	PRJNA657455	142252	298532	446255827	4185	17197
SRR12529208	PRJNA657455	100559	418879	405909048	9292	7359
SRR12529209	PRJNA657455	5340	72555	8998715	1590	1591
SRR12529210	PRJNA657455	1016892	685112	2554989507	2858	177177
SRR12529211	PRJNA657455	817141	570592	2154967319	3133	132983
SRR12529212	PRJNA657455	575723	647315	1585999976	3397	82480
SRR12529213	PRJNA657455	1107713	277898	2234694639	2044	283569
SRR12529214	PRJNA657455	530954	604485	1902303788	6231	46689
SRR12529215	PRJNA657455	463801	464745	1081870868	2530	90312
SRR12529216	PRJNA657455	377993	547835	918765876	2679	69217
SRR12529217	PRJNA657455	176643	469416	431209207	2690	31081
SRR12529218	PRJNA657455	452076	234901	832655719	1806	128381
SRR12529219	PRJNA657455	272708	657566	880512734	5011	25635
SRR12529220	PRJNA657455	18065	81678	27152077	1323	5943
SRR12529221	PRJNA657455	250515	438281	581272223	2476	46390
SRR12529222	PRJNA657455	107203	913962	284109639	3179	16420
SRR12529223	PRJNA657455	150656	460155	376867296	2809	23121
SRR12529224	PRJNA657455	252604	248684	524843174	2105	58848
SRR12529225	PRJNA657455	395484	444420	1053603936	3165	61666
SRR12529226	PRJNA657455	477972	491293	1165990056	2731	84104
SRR12529227	PRJNA657455	523420	574420	1210288736	2488	106085
SRR12529228	PRJNA657455	311607	915859	926109677	4148	38371
SRR12529229	PRJNA657455	427546	161866	860259126	2049	109234
SRR12529230	PRJNA657455	248613	931142	806774706	4963	24672
SRR12529231	PRJNA657455	1139	16711	1832368	1522	369
SRR12529232	PRJNA657455	79575	522359	157491294	1931	19741
SRR12529233	PRJNA657455	21290	22529	26609852	1177	8900
SRR12529234	PRJNA657455	4013	16822	6456175	1518	1291
SRR12529235	PRJNA657455	53744	64626	103669746	1897	13867
SRR12529236	PRJNA657455	3362	149082	7219745	2273	733
SRR12529237	PRJNA657455	11527	208786	25435573	2098	1871
SRR12529238	PRJNA657455	2547	22164	4510700	1718	741
SRR12529239	PRJNA657455	30616	62198	55913899	1793	8702
SRR12529240	PRJNA657455	4153	33542	7168812	1653	1240
SRR12529241	PRJNA657455	3481	418016	7324933	2169	762
SRR12529242	PRJNA657455	4001	16906	5634772	1284	1455
SRR12529243	PRJNA657455	2298	22800	4107340	1722	648
SRR12529244	PRJNA657455	42895	53168	56784677	1248	17128
SRR12529245	PRJNA657455	2176	20782	3790223	1690	657
SRR12529246	PRJNA657455	4634	57809	7193517	1411	1492
SRR12529247	PRJNA657455	35966	46768	44844355	1202	15297
SRR12529248	PRJNA657455	259681	353648	599678367	2445	48376
SRR12529249	PRJNA657455	42128	371692	108935160	3023	6754
SRR12529250	PRJNA657455	92850	313280	239503689	3031	13079
SRR12529251	PRJNA657455	190698	407079	394397425	2085	44640
SRR12529252	PRJNA657455	343150	418017	932006890	3305	49910
SRR12529253	PRJNA657455	103118	892883	214978576	2099	23592
SRR12529254	PRJNA657455	407983	374259	955417655	2505	76225
SRR12529255	PRJNA657455	320336	723527	927460947	3831	44306
SRR12529256	PRJNA657455	303682	520121	784849673	3020	49758
SRR12529257	PRJNA657455	379539	407079	770533851	2040	92700
SRR12529258	PRJNA657455	381219	423640	1032751550	3274	57562
SRR12529259	PRJNA657455	381873	367604	884669616	2475	72674
SRR12529260	PRJNA657455	359072	449747	800776849	2368	77139
SRR12529261	PRJNA657455	45119	191950	87593892	1854	11269
SRR12529262	PRJNA657455	400058	258183	723370417	1773	116576
SRR12529263	PRJNA657455	289255	806429	823119047	3652	37031
SRR12529264	PRJNA657455	295052	542660	590414035	1992	73095
SRR12529265	PRJNA657455	707356	648369	2001810079	3519	98247
SRR12529266	PRJNA657455	598484	681274	1694319547	3537	82402
SRR12529267	PRJNA657455	643735	530668	1845499084	3663	87225
SRR12529268	PRJNA657455	583430	1165733	1631116210	3462	80585
SRR12529269	PRJNA657455	621258	681977	1769875695	3563	83762
SRR12529270	PRJNA657455	299329	562552	835698011	3595	39556
SRR12529271	PRJNA657455	351862	542534	919887188	3038	53998
SRR12529272	PRJNA657455	315022	373095	825785219	3098	49333
SRR12529273	PRJNA657455	260849	638314	690845208	3166	39836
SRR12529274	PRJNA657455	213171	663748	572041234	3151	30883
SRR12529275	PRJNA657455	421247	145217	861259309	2103	105571
SRR12529276	PRJNA657455	258773	654312	701273093	3323	37432
SRR12529277	PRJNA657455	295816	460874	788836133	3209	44755
SRR12529278	PRJNA657455	430816	506601	1215922765	3591	57753
SRR12529279	PRJNA657455	332596	943135	943902051	3620	44925
SRR12529280	PRJNA657455	361462	774365	1004932650	3474	47807
SRR12529281	PRJNA657455	307742	508615	974050885	4834	33451
SRR12529282	PRJNA657455	368936	679653	1090642581	3951	44034
SRR12529283	PRJNA657455	256132	562249	743759162	3830	33761
SRR12529284	PRJNA657455	360013	862719	1086574165	4202	43196
SRR12529285	PRJNA657455	356507	547210	1007344544	3571	46708
SRR12529286	PRJNA657455	426056	450047	1079813588	2942	76273
SRR12529287	PRJNA657455	479842	152094	935027721	1933	125327
SRR12529288	PRJNA657455	77312	447862	278397548	6420	7186
SRR12529289	PRJNA657455	89543	386459	314164306	5987	8458
SRR12529290	PRJNA657455	94902	553788	293865588	4436	10977
SRR12529291	PRJNA657455	165684	749328	582907395	6287	14657
SRR12529292	PRJNA657455	121858	699993	433710595	6162	11437
SRR12529293	PRJNA657455	108509	722358	405272475	7434	8555
SRR12529294	PRJNA657455	126817	323790	458060349	6341	11756
SRR12529295	PRJNA657455	83680	530222	266974710	4584	9808
SRR12529296	PRJNA657455	108133	775743	380037109	5906	10914
SRR12529297	PRJNA657455	110154	1056342	398897477	6449	9968
SRR12529298	PRJNA657455	402101	219817	895946492	2362	87039
SRR12529299	PRJNA657455	93695	722137	331887006	6523	7989
SRR12529300	PRJNA657455	141368	722055	473280660	5317	13975
SRR12529301	PRJNA657455	340135	493832	1081686474	4659	41802
SRR12529302	PRJNA657455	156389	722137	495581886	5180	14776
SRR12529303	PRJNA657455	85344	699853	268387428	4548	10536
SRR12529304	PRJNA657455	333559	509863	919931223	3436	46620
SRR12529305	PRJNA657455	343579	520656	883242015	2995	57209
SRR12529306	PRJNA657455	376280	737306	1104667163	3972	46412
SRR12529307	PRJNA657455	386696	862214	1097921854	3637	54298
SRR12529308	PRJNA657455	264640	596480	782634776	4071	29904
SRR12529309	PRJNA657455	292886	438948	690307798	2584	57893
SRR12529310	PRJNA657455	150795	269163	385457750	2974	24733
SRR12529311	PRJNA657455	176206	507137	420724241	2624	32791
SRR12529312	PRJNA657455	234040	609200	659280714	3629	32256
SRR12529313	PRJNA657455	223169	281231	579513577	3095	36160
SRR12529314	PRJNA657455	262228	431498	683461385	3073	41290
SRR12529315	PRJNA657455	241726	499319	692920181	3723	32834
SRR12529316	PRJNA657455	242198	350796	698801073	3724	29789
SRR12529317	PRJNA657455	48640	285632	131764421	3553	7031
SRR12529318	PRJNA657455	177495	694743	474733855	3397	24436
SRR12529319	PRJNA657455	224469	1056333	668618205	4139	24965
SRR12529320	PRJNA657455	262582	189053	514163916	1955	68344
SRR12529321	PRJNA657455	255543	689478	953767469	7250	18597
SRR12529322	PRJNA657455	122586	608342	508780688	8801	8730
SRR12529323	PRJNA657455	173710	768516	668603309	7040	12662
SRR12529324	PRJNA657455	287152	581281	952124169	5795	22668
SRR12529325	PRJNA657455	282751	523380	934960254	4598	31399
SRR12529326	PRJNA657455	124262	563215	441506729	6767	9341
SRR12529327	PRJNA657455	86870	530266	353782934	9204	5744
SRR12529328	PRJNA657455	121138	967346	453647914	7390	7832
SRR12529329	PRJNA657455	144504	522021	533069554	6762	11832
SRR12529330	PRJNA657455	210169	338483	583984097	3157	33727
SRR12529331	PRJNA657455	347070	408773	783386172	2420	74285
SRR12529332	PRJNA657455	206360	563968	741638276	6692	16892
SRR12529333	PRJNA657455	219622	643184	859839606	8863	14526
SRR12529334	PRJNA657455	270085	528729	843476845	4498	31126
SRR12529335	PRJNA657455	267470	705923	905139004	5512	24623
SRR12529336	PRJNA657455	287453	624266	921528075	4884	28226
SRR12529337	PRJNA657455	118382	723752	467121903	8788	8116
SRR12529338	PRJNA657455	87646	545076	418525279	12780	5578
SRR12529339	PRJNA657455	69610	588618	345750309	16906	3554
SRR12529340	PRJNA657455	174611	571937	627049909	6839	13410
SRR12529341	PRJNA657455	133710	440145	443140937	5562	11386
SRR12529342	PRJNA657455	448817	533039	968624494	2257	103714
SRR12529343	PRJNA657455	44241	65887	67529380	1368	14665
SRR12529344	PRJNA657455	55180	220436	90002563	1439	16507
SRR12529345	PRJNA657455	67171	557375	221937321	5458	6286
SRR12529346	PRJNA657455	101355	411751	324949921	4986	10014
SRR12529347	PRJNA657455	126922	681744	393337672	4496	16020
SRR12529348	PRJNA657455	74158	563980	134003883	1620	19104
SRR12529349	PRJNA657455	59512	304230	102335896	1532	16568
SRR12529350	PRJNA657455	92147	30662	131370811	1360	34831
SRR12529351	PRJNA657455	64941	19857	91928807	1342	24651
SRR12529352	PRJNA657455	70179	38678	99401145	1341	26532
SRR12529353	PRJNA657455	261372	235103	546716527	2158	63249
SRR12529354	PRJNA657455	46988	23266	64853526	1301	18138
SRR12529355	PRJNA657455	70637	60993	100138810	1345	26798
SRR12529356	PRJNA657455	58858	26168	83583487	1341	22199
SRR12529357	PRJNA657455	132690	509859	451724678	5921	12776
SRR12529358	PRJNA657455	111161	320259	315138569	3873	11811
SRR12529359	PRJNA657455	181722	544976	604999177	5319	16757
SRR12529360	PRJNA657455	182194	643824	727618264	9500	11946
SRR12529361	PRJNA657455	230417	593763	729049785	4626	25795
SRR12529362	PRJNA657455	254738	499285	849859222	5368	24143
SRR12529363	PRJNA657455	311881	544482	988273823	4692	32846
SRR12529364	PRJNA657455	338004	369455	709292682	2132	77830
SRR12529365	PRJNA657455	236755	726112	834216537	6266	19973
SRR12529366	PRJNA657455	182612	693844	699945806	8069	13060
SRR12529367	PRJNA657455	243029	583675	825147802	5661	23824
SRR12529368	PRJNA657455	244904	464306	857086622	6016	21690
SRR12529369	PRJNA657455	288128	595948	938195434	5004	29828
SRR12529370	PRJNA657455	83338	564012	267952886	5617	6885
SRR12529371	PRJNA657455	82577	503709	311656883	8831	5554
SRR12529372	PRJNA657455	71404	588743	255056649	7381	5309
SRR12529373	PRJNA657455	93896	465221	312045122	6153	8000
SRR12529374	PRJNA657455	121674	321198	436483321	6643	10182
SRR12529375	PRJNA657455	253786	420155	511009088	2029	63582
SRR12529376	PRJNA657455	346475	483116	1226097682	5998	33152
SRR12529377	PRJNA657455	478003	569071	1772194455	6881	42332
SRR12529378	PRJNA657455	401462	569676	1454239912	6305	38555
SRR12529379	PRJNA657455	406183	743268	1499098017	6531	37939
SRR12529380	PRJNA657455	420003	744202	1531147943	6478	38266
SRR12529381	PRJNA657455	433079	743979	1554708021	6035	44254
SRR12529382	PRJNA657455	205852	568948	722284603	5920	19068
SRR12529383	PRJNA657455	259347	868085	883325229	5704	25446
SRR12529384	PRJNA657455	229033	461771	743555080	5020	23111
SRR12529385	PRJNA657455	292406	639702	972229105	5136	31162
SRR12529386	PRJNA657455	401832	283320	839062123	2147	96727
SRR12529387	PRJNA657455	232699	515974	796794354	5579	22175
SRR12529388	PRJNA657455	274616	645841	863130266	4570	32208
SRR12529389	PRJNA657455	321928	569678	938031123	3811	40283
SRR12529390	PRJNA657455	227595	522165	702764697	4498	25062
SRR12529391	PRJNA657455	288127	426180	856631288	3994	35912
SRR12529392	PRJNA657455	331275	517928	963745244	3808	42554
SRR12529393	PRJNA657455	148377	749411	409521402	3440	20499
SRR12529394	PRJNA657455	305083	542533	924937770	4250	34976
SRR12529395	PRJNA657455	265765	1063454	893174534	5722	23089
SRR12529396	PRJNA657455	276921	592199	907541071	5003	27040
SRR12529397	PRJNA657455	310471	379028	690129070	2350	67868
SRR12529398	PRJNA657455	355526	209481	682043090	1894	95035
SRR12529399	PRJNA657455	168423	142133	294822301	1705	51141
AMSCB1-2	PRJNA723432	86625	631273	259538619	4195	9522
AMSCB2-1	PRJNA723432	130626	192014	313191803	2627	23974
AMSCB3-2	PRJNA723432	81278	392372	306445775	7838	6465
AMSCB4-1	PRJNA723432	108044	416221	325634658	4286	12859
AMSCB5-2	PRJNA723432	114735	394391	332511663	3817	14717
AMSCH3-1	PRJNA723432	582	17212	825659	1302	213
AMSCJ1-1	PRJNA723432	84759	493350	242285432	3678	12176
AMSCJ2-2	PRJNA723432	96705	344204	229890487	2621	18189
AMSCJ3-1	PRJNA723432	51451	298487	138436041	3317	7774
AMSCJ5-2	PRJNA723432	34713	292658	97921020	3644	3602
AMSCK2-1	PRJNA723432	327	14436	452109	1248	121
AMSCK3-1	PRJNA723432	275	16571	403899	1277	95
AMSCK4-1	PRJNA723432	454	15461	668857	1318	156
AMSCL1-1	PRJNA723432	66159	326469	181982235	3479	9544
AMSCL2-1	PRJNA723432	125226	222789	277206990	2295	26817
AMSCL3-1	PRJNA723432	88427	392750	340529852	7215	7855
AMSCL4-1	PRJNA723432	119402	409742	363280244	4201	14346
AMSCL5-2	PRJNA723432	120223	394391	333438807	3420	16237
AMSCO1-1	PRJNA723432	62665	442232	162426165	2970	9883
AMSCO2-2	PRJNA723432	91348	274847	215885133	2593	17283
AMSCO3-1	PRJNA723432	80583	741413	223373223	3503	11159
AMSCO4-1	PRJNA723432	62182	454322	165138597	3149	8592
AMSCO5-2	PRJNA723432	54615	290188	148895181	3249	6720
AMSCS5-1	PRJNA723432	82346	394050	220036596	3159	13434
AMSCS5-2	PRJNA723432	83016	394391	216069626	3021	13661
AMSCW1-1	PRJNA723432	87253	311482	234567853	3255	13286
AMSCW2-1	PRJNA723432	134734	291191	313498749	2470	25759
AMSCW3-1	PRJNA723432	90119	404955	330414318	6374	8434
AMSCW4-1	PRJNA723432	109171	374875	347507253	4727	11918
AMSCW5-2	PRJNA723432	107803	481888	329349579	4237	13228
AMSCZ2-1	PRJNA723432	15736	47542	29981467	1818	3994
AMSCZ3-1	PRJNA723432	28937	267287	92982745	4946	2918
AMSCZ5-2	PRJNA723432	72895	394391	189329302	2992	11933
AMSFB10-1	PRJNA723432	90646	420521	244881424	3315	13385
AMSFB11-1	PRJNA723432	84577	318637	255134790	4166	9947
AMSFB12-1	PRJNA723432	106781	481201	304715792	3653	13697
AMSFB13-2	PRJNA723432	135957	385013	323052923	2536	24617
AMSFB14-1	PRJNA723432	89853	404841	242411904	3335	11862
AMSFB2-1	PRJNA723432	86157	703820	232538031	3351	12665
AMSFB3-1	PRJNA723432	96727	431172	276307445	3640	12862
AMSFB4-1	PRJNA723432	74107	346480	241209059	5404	7665
AMSFB5-1	PRJNA723432	83877	416539	250527411	4517	10041
AMSFB6-1	PRJNA723432	96897	193716	243565066	2879	17249
AMSFB8-1	PRJNA723432	84467	512415	257173822	4455	8602
AMSFB9-2	PRJNA723432	92323	324986	270729398	3937	11733
AMSFH11-1	PRJNA723432	1575	62969	2856574	1728	450
AMSFH12-2	PRJNA723432	10482	219446	25194830	2564	1556
AMSFH13-1	PRJNA723432	601	287896	6111615	93852	20
AMSFH3-2	PRJNA723432	629	167679	1095661	1439	160
AMSFH4-1	PRJNA723432	35933	384488	112914511	4948	3380
AMSFH5-1	PRJNA723432	188	11686	315802	1490	54
AMSFH6-1	PRJNA723432	20877	81945	44583880	2195	4852
AMSFH8-1	PRJNA723432	26157	342437	69755867	3200	3818
AMSFH9-1	PRJNA723432	405	30086	940768	2613	69
AMSFJ10-1	PRJNA723432	75627	401310	180229066	2549	12714
AMSFJ11-1	PRJNA723432	26849	158554	73497902	3472	3780
AMSFJ12-1	PRJNA723432	33927	627537	94732290	3393	5086
AMSFJ13-2	PRJNA723432	102421	417088	289716184	3657	12974
AMSFJ14-1	PRJNA723432	88176	231848	222371073	2928	14418
AMSFJ2-2	PRJNA723432	33185	170554	80247414	2739	5892
AMSFJ3-1	PRJNA723432	51671	362787	160765114	4476	6240
AMSFJ4-1	PRJNA723432	91869	384131	278815321	4326	9809
AMSFJ5-1	PRJNA723432	64222	223047	163501410	2975	10788
AMSFJ6-1	PRJNA723432	56291	217898	136702190	2699	10092
AMSFJ8-1	PRJNA723432	51033	563549	125989759	2758	8213
AMSFJ9-2	PRJNA723432	89533	261216	229817367	3005	13640
AMSFK11-1	PRJNA723432	8166	230678	21506309	3120	1123
AMSFK12-1	PRJNA723432	421	16282	680347	1478	132
AMSFK13-2	PRJNA723432	1854	273466	8658801	48454	42
AMSFK3-2	PRJNA723432	218	16767	310926	1283	78
AMSFK4-2	PRJNA723432	30552	384481	104108501	6168	2581
AMSFK7-2	PRJNA723432	1011	101170	1934114	1738	228
AMSFK8-1	PRJNA723432	5946	61090	13734370	2435	1157
AMSFL10-1	PRJNA723432	100739	353489	263886452	3068	15040
AMSFL11-1	PRJNA723432	89057	297751	258918932	3910	10782
AMSFL12-1	PRJNA723432	112603	437251	305182228	3249	17063
AMSFL13-2	PRJNA723432	139114	254134	315972933	2366	27730
AMSFL14-1	PRJNA723432	119996	437521	348195845	3947	15718
AMSFL2-1	PRJNA723432	99759	569610	283196735	3663	14365
AMSFL3-1	PRJNA723432	85285	966231	228979415	3149	12391
AMSFL4-1	PRJNA723432	71899	536236	236046565	5194	8007
AMSFL5-1	PRJNA723432	101517	278348	300282696	4037	12694
AMSFL6-1	PRJNA723432	98974	199171	283579977	3794	14323
AMSFL8-1	PRJNA723432	87459	326502	278084288	4610	10352
AMSFL9-2	PRJNA723432	81037	500470	235479843	3802	10200
AMSFO10-1	PRJNA723432	64954	401150	164252459	2881	9856
AMSFO11-1	PRJNA723432	77809	298576	231050803	4176	8503
AMSFO12-1	PRJNA723432	42995	631332	129226614	4121	5349
AMSFO13-2	PRJNA723432	72991	445250	234129690	4929	7282
AMSFO14-1	PRJNA723432	91789	351570	233092014	2899	14112
AMSFO3-2	PRJNA723432	45630	674382	146121412	4953	4141
AMSFO4-1	PRJNA723432	111424	415938	331453356	4046	13233
AMSFO5-1	PRJNA723432	98975	464092	257905388	3057	15583
AMSFO6-1	PRJNA723432	86682	318387	213248182	2793	15047
AMSFO8-1	PRJNA723432	86663	638486	226334336	3081	13283
AMSFO9-2	PRJNA723432	62276	246164	155577576	2852	10328
AMSFS10-1	PRJNA723432	93662	349704	257345152	3402	13485
AMSFS11-1	PRJNA723432	45808	236697	131327540	3687	5584
AMSFS12-1	PRJNA723432	74656	437233	193982160	3080	11829
AMSFS13-2	PRJNA723432	1792	43470	4641542	4376	191
AMSFS14-1	PRJNA723432	108747	395642	305753088	3625	16185
AMSFS4-1	PRJNA723432	60317	470972	177395323	4113	6909
AMSFS5-1	PRJNA723432	79005	278215	225398429	3698	12076
AMSFS6-1	PRJNA723432	16045	28941	27182038	1673	5133
AMSFS7-2	PRJNA723432	7759	167141	18604106	2675	1330
AMSFS8-1	PRJNA723432	4404	34705	8831750	2117	1211
AMSFS9-2	PRJNA723432	47299	192265	137765778	4063	6121
AMSFW10-1	PRJNA723432	109267	421016	310098187	3802	14196
AMSFW11-1	PRJNA723432	106431	297751	313284103	3933	13146
AMSFW12-1	PRJNA723432	98910	269509	260150354	3138	15331
AMSFW13-2	PRJNA723432	134962	507198	314561000	2507	25662
AMSFW14-1	PRJNA723432	107211	292843	310140228	3812	15056
AMSFW2-1	PRJNA723432	90936	345285	251658408	3374	13335
AMSFW3-2	PRJNA723432	89169	831903	233938376	3008	13810
AMSFW4-1	PRJNA723432	63415	242592	205691782	4940	7289
AMSFW5-1	PRJNA723432	85107	217297	252583272	4109	10650
AMSFW6-1	PRJNA723432	107437	335077	314417179	3902	14739
AMSFW8-1	PRJNA723432	95277	427032	311413995	5033	10456
AMSFW9-2	PRJNA723432	72289	356010	237214904	5146	7046
AMSFZ10-1	PRJNA723432	81957	318850	231337306	3726	11051
AMSFZ11-1	PRJNA723432	92950	416397	272158048	4029	10674
AMSFZ12-1	PRJNA723432	64349	317470	168496217	3098	9614
AMSFZ14-1	PRJNA723432	132947	510105	320387518	2582	23771
AMSFZ2-1	PRJNA723432	53912	389843	145283239	3322	7621
AMSFZ3-1	PRJNA723432	3143	542498	8744505	4872	113
AMSFZ4-1	PRJNA723432	93680	310194	296042599	4621	10955
AMSFZ5-1	PRJNA723432	84983	361855	268714752	4812	10133
AMSFZ6-1	PRJNA723432	97661	182853	257172878	3195	16043
AMSFZ8-1	PRJNA723432	59964	292038	183475994	4287	7987
AMSFZ9-2	PRJNA723432	46296	270273	144326794	4741	5330
AWMGB10-1	PRJNA723432	54601	602165	220510325	8667	4474
AWMGB11-2	PRJNA723432	40820	314591	156869572	6780	3830
AWMGB1-2	PRJNA723432	133898	340475	324187346	2676	24264
AWMGB12-2	PRJNA723432	136889	427747	351506700	3022	23881
AWMGB13-2	PRJNA723432	133342	658083	305858252	2424	26821
AWMGB20-1	PRJNA723432	44597	500556	173172163	8485	2595
AWMGB2-1	PRJNA723432	20616	591030	88876670	9956	1280
AWMGB21-2	PRJNA723432	69630	617739	250615099	6328	6520
AWMGB3-1	PRJNA723432	91138	638273	307136876	5840	7731
AWMGB4-1	PRJNA723432	109884	388389	238308791	2224	23599
AWMGB5-1	PRJNA723432	69865	443834	210212738	4212	7672
AWMGB8-2	PRJNA723432	18344	617743	92369941	13659	1187
AWMGB9-1	PRJNA723432	44529	323297	198338783	11264	2852
AWMGH10-2	PRJNA723432	208	12230	295420	1278	75
AWMGH11-2	PRJNA723432	337	102681	844695	2832	31
AWMGH1-2	PRJNA723432	265	14790	375119	1276	96
AWMGH13-2	PRJNA723432	253	12177	348817	1239	95
AWMGH20-1	PRJNA723432	41081	535320	151642661	6610	3351
AWMGH2-1	PRJNA723432	417	20164	647392	1397	135
AWMGH3-1	PRJNA723432	1321	14157	2148477	1593	438
AWMGH4-1	PRJNA723432	210	13730	306930	1300	72
AWMGH7-2	PRJNA723432	383	42937	899387	2798	58
AWMGH8-2	PRJNA723432	238	13672	359795	1332	79
AWMGH9-2	PRJNA723432	675	30857	1071262	1408	209
AWMGJ10-1	PRJNA723432	45682	309870	142489123	4372	5483
AWMGJ1-1	PRJNA723432	69237	363132	179785013	3072	10339
AWMGJ12-2	PRJNA723432	19092	113414	43540759	2369	3708
AWMGJ13-2	PRJNA723432	29440	296122	61800436	2126	6954
AWMGJ20-1	PRJNA723432	30989	739587	132433112	9623	2292
AWMGJ2-1	PRJNA723432	12128	310559	34332714	3484	1424
AWMGJ21-2	PRJNA723432	32384	383557	83725339	3008	5560
AWMGJ3-1	PRJNA723432	20792	416803	78518245	8588	1464
[truncated: 335 more rows]

## Sheet: Table S5
Statistical information and classification level annotation of 64,922 phages
Virus	Viral cluster	Genome size	Quality	Viral lifestyle	Phylum	Class	Order	Family	Genus	Animal Host	Animal Bodysites
Buffalo_1	VC_18410	146076	Medium-quality	uncertain_virulent	Nucleocytoviricota	Pokkesviricetes	Chitovirales	Poxviridae	Parapoxvirus	Buffalo	Rectum
Buffalo_10	VC_7579	48744	Medium-quality	uncertain_temperate	Uroviricota	Caudoviricetes	Caudovirales	Siphoviridae	Unassigned	Buffalo	Rectum
Buffalo_100	VC_4032	42444	Medium-quality	uncertain_temperate	Uroviricota	Caudoviricetes	Caudovirales	Siphoviridae	Nevevirus	Buffalo	Rectum
Buffalo_1000	VC_7416	39356	Medium-quality	uncertain_temperate	Unassigned	Unassigned	Unassigned	Unassigned	Unassigned	Buffalo	Omasum
Buffalo_10000	VC_24869	39986	Medium-quality	uncertain_temperate	Uroviricota	Caudoviricetes	Caudovirales	Herelleviridae	Harbinvirus	Buffalo	Rectum
Buffalo_10002	VC_24870	19633	Medium-quality	virulent	Uroviricota	Caudoviricetes	Caudovirales	Guelinviridae	Brucesealvirus	Buffalo	Rectum
Buffalo_10003	VC_24871	63326	Medium-quality	uncertain_virulent	Unassigned	Unassigned	Unassigned	Unassigned	Unassigned	Buffalo	Rectum
Buffalo_10005	VC_24872	33768	Medium-quality	uncertain_virulent	Uroviricota	Caudoviricetes	Caudovirales	Siphoviridae	Kenoshavirus	Buffalo	Rectum
Buffalo_10006	VC_24873	178585	High-quality	uncertain_virulent	Nucleocytoviricota	Pokkesviricetes	Chitovirales	Poxviridae	Betaentomopoxvirus	Buffalo	Rectum
Buffalo_10008	VC_24874	14498	Medium-quality	uncertain_virulent	Unassigned	Unassigned	Unassigned	Unassigned	Unassigned	Buffalo	Rectum
Buffalo_10009	VC_472	38286	Medium-quality	uncertain_virulent	Nucleocytoviricota	Pokkesviricetes	Chitovirales	Poxviridae	Capripoxvirus	Buffalo	Rectum
Buffalo_1001	VC_18935	51872	Medium-quality	uncertain_virulent	Uroviricota	Caudoviricetes	Caudovirales	Siphoviridae	Unassigned	Buffalo	Colon
Buffalo_10010	VC_4021	44302	Medium-quality	uncertain_virulent	Pisuviricota	Pisoniviricetes	Nidovirales	Coronaviridae	Betacoronavirus	Buffalo	Rectum
Buffalo_10011	VC_380	12842	Medium-quality	virulent	Unassigned	Unassigned	Unassigned	Unassigned	Unassigned	Buffalo	Rectum
Buffalo_10012	VC_24875	6036	Complete	virulent	Unassigned	Unassigned	Unassigned	Unassigned	Unassigned	Buffalo	Rectum
Buffalo_10013	VC_24876	44154	Medium-quality	uncertain_temperate	Unassigned	Unassigned	Unassigned	Unassigned	Unassigned	Buffalo	Rectum
Buffalo_10015	VC_24877	37504	Medium-quality	uncertain_temperate	Nucleocytoviricota	Pokkesviricetes	Chitovirales	Poxviridae	Betaentomopoxvirus	Buffalo	Rectum
Buffalo_10016	VC_1674	6593	Complete	uncertain_temperate	Unassigned	Unassigned	Unassigned	Unassigned	Unassigned	Buffalo	Rectum
Buffalo_10018	VC_24878	57718	Medium-quality	uncertain_temperate	Nucleocytoviricota	Megaviricetes	Imitervirales	Mimiviridae	Mimivirus	Buffalo	Rectum
Buffalo_10019	VC_4022	42424	Medium-quality	uncertain_virulent	Uroviricota	Caudoviricetes	Caudovirales	Siphoviridae	Unassigned	Buffalo	Rectum
Buffalo_1002	VC_7417	40482	Medium-quality	uncertain_temperate	Nucleocytoviricota	Megaviricetes	Imitervirales	Mimiviridae	Mimivirus	Buffalo	Colon,Cecum
Buffalo_10020	VC_24879	42074	Medium-quality	uncertain_virulent	Unassigned	Unassigned	Unassigned	Polydnaviriformidae	Ichnoviriform	Buffalo	Rectum
Buffalo_10022	VC_24880	56004	Medium-quality	uncertain_temperate	Uroviricota	Caudoviricetes	Caudovirales	Siphoviridae	Nevevirus	Buffalo	Rectum
Buffalo_10023	VC_24881	57480	Medium-quality	temperate	Uroviricota	Caudoviricetes	Caudovirales	Herelleviridae	Schiekvirus	Buffalo	Rectum
Buffalo_10024	VC_24882	74703	Medium-quality	virulent	Uroviricota	Caudoviricetes	Caudovirales	Schitoviridae	Gamaleyavirus	Buffalo	Rectum
Buffalo_10025	VC_24883	31923	Medium-quality	uncertain_temperate	Uroviricota	Caudoviricetes	Caudovirales	Siphoviridae	Skunavirus	Buffalo	Rectum
Buffalo_10026	VC_24884	32215	Medium-quality	temperate	Nucleocytoviricota	Pokkesviricetes	Chitovirales	Poxviridae	Betaentomopoxvirus	Buffalo	Rectum
Buffalo_10027	VC_24885	54361	Medium-quality	uncertain_temperate	Nucleocytoviricota	Megaviricetes	Imitervirales	Mimiviridae	Mimivirus	Buffalo	Rectum
Buffalo_10029	VC_381	48046	Medium-quality	uncertain_virulent	Unassigned	Unassigned	Unassigned	Unassigned	Unassigned	Buffalo	Rectum
Buffalo_1003	VC_18936	41246	Medium-quality	uncertain_virulent	Nucleocytoviricota	Pokkesviricetes	Chitovirales	Poxviridae	Betaentomopoxvirus	Buffalo	Colon
Buffalo_10030	VC_24886	31168	Medium-quality	uncertain_temperate	Uroviricota	Caudoviricetes	Caudovirales	Siphoviridae	Unassigned	Buffalo	Rectum
Buffalo_10031	VC_24887	44728	Medium-quality	uncertain_temperate	Uroviricota	Caudoviricetes	Caudovirales	Siphoviridae	Efquatrovirus	Buffalo	Rectum
Buffalo_10032	VC_24888	18090	Medium-quality	virulent	Uroviricota	Caudoviricetes	Caudovirales	Myoviridae	Phapecoctavirus	Buffalo	Rectum
Buffalo_10033	VC_24889	25189	Medium-quality	uncertain_temperate	Unassigned	Unassigned	Unassigned	Unassigned	Unassigned	Buffalo	Rectum
Buffalo_10034	VC_24890	64685	Medium-quality	uncertain_virulent	Nucleocytoviricota	Megaviricetes	Imitervirales	Mimiviridae	Mimivirus	Buffalo	Rectum
Buffalo_10035	VC_2451	37356	Medium-quality	uncertain_temperate	Nucleocytoviricota	Megaviricetes	Imitervirales	Mimiviridae	Mimivirus	Buffalo	Rectum
Buffalo_10036	VC_24891	186441	Medium-quality	uncertain_virulent	Nucleocytoviricota	Megaviricetes	Imitervirales	Mimiviridae	Mimivirus	Buffalo	Rectum
Buffalo_10037	VC_1675	30240	Medium-quality	uncertain_virulent	Unassigned	Unassigned	Unassigned	Unassigned	Unassigned	Buffalo	Rectum
Buffalo_10038	VC_24892	32728	Medium-quality	uncertain_virulent	Uroviricota	Caudoviricetes	Caudovirales	Salasmaviridae	Salasvirus	Buffalo	Rectum
Buffalo_10039	VC_24893	41921	Medium-quality	uncertain_temperate	Unassigned	Unassigned	Unassigned	Unassigned	Unassigned	Buffalo	Rectum
Buffalo_1004	VC_7418	10128	Medium-quality	virulent	Unassigned	Unassigned	Unassigned	Unassigned	Unassigned	Buffalo	Colon
Buffalo_10040	VC_24894	73262	Medium-quality	uncertain_temperate	Nucleocytoviricota	Pokkesviricetes	Chitovirales	Poxviridae	Betaentomopoxvirus	Buffalo	Rectum
Buffalo_10042	VC_24895	98974	Medium-quality	uncertain_temperate	Nucleocytoviricota	Pokkesviricetes	Chitovirales	Poxviridae	Betaentomopoxvirus	Buffalo	Rectum
Buffalo_10043	VC_24896	34155	Medium-quality	uncertain_temperate	Uroviricota	Caudoviricetes	Caudovirales	Siphoviridae	Unassigned	Buffalo	Rectum
Buffalo_10044	VC_24897	42086	Medium-quality	uncertain_temperate	Uroviricota	Caudoviricetes	Caudovirales	Siphoviridae	Kenoshavirus	Buffalo	Rectum
Buffalo_10045	VC_24898	33249	Medium-quality	temperate	Unassigned	Naldaviricetes	Lefavirales	Baculoviridae	Alphabaculovirus	Buffalo	Rectum
Buffalo_10046	VC_4023	38976	Medium-quality	uncertain_virulent	Unassigned	Unassigned	Unassigned	Unassigned	Unassigned	Buffalo	Rectum
Buffalo_10047	VC_24899	140638	Medium-quality	uncertain_virulent	Nucleocytoviricota	Megaviricetes	Imitervirales	Mimiviridae	Mimivirus	Buffalo	Rectum
Buffalo_10048	VC_24900	12046	Medium-quality	uncertain_virulent	Unassigned	Unassigned	Unassigned	Unassigned	Unassigned	Buffalo	Rectum
Buffalo_10049	VC_24901	40547	Medium-quality	virulent	Uroviricota	Caudoviricetes	Caudovirales	Siphoviridae	Kenoshavirus	Buffalo	Rectum
Buffalo_1005	VC_18937	5096	High-quality	uncertain_virulent	Cressdnaviricota	Arfiviricetes	Cirlivirales	Circoviridae	Unassigned	Buffalo	Colon,Jejunum
Buffalo_10050	VC_24902	52859	Medium-quality	uncertain_virulent	Unassigned	Unassigned	Unassigned	Fuselloviridae	Alphafusellovirus	Buffalo	Rectum
Buffalo_10052	VC_24903	77500	Medium-quality	uncertain_temperate	Unassigned	Naldaviricetes	Lefavirales	Nudiviridae	Alphanudivirus	Buffalo	Rectum
Buffalo_10053	VC_24904	43735	Medium-quality	virulent	Unassigned	Unassigned	Unassigned	Unassigned	Unassigned	Buffalo	Rectum
Buffalo_10055	VC_24905	153526	Complete	uncertain_virulent	Nucleocytoviricota	Pokkesviricetes	Chitovirales	Poxviridae	Betaentomopoxvirus	Buffalo	Rectum
Buffalo_10056	VC_24906	68579	Medium-quality	virulent	Uroviricota	Caudoviricetes	Caudovirales	Siphoviridae	Unassigned	Buffalo	Rectum
Buffalo_10057	VC_4025	5731	Complete	uncertain_virulent	Phixviricota	Malgrandaviricetes	Petitvirales	Microviridae	Unassigned	Buffalo	Rectum
Buffalo_10058	VC_1171	7164	Complete	uncertain_virulent	Unassigned	Unassigned	Unassigned	Unassigned	Unassigned	Buffalo	Rectum
Buffalo_10059	VC_24907	6845	Complete	uncertain_virulent	Phixviricota	Malgrandaviricetes	Petitvirales	Microviridae	Unassigned	Buffalo	Rectum
Buffalo_1006	VC_7419	75134	Medium-quality	uncertain_temperate	Unassigned	Unassigned	Unassigned	Unassigned	Unassigned	Buffalo	Colon,Abomasum
Buffalo_10060	VC_24908	30388	Medium-quality	uncertain_temperate	Unassigned	Unassigned	Unassigned	Unassigned	Unassigned	Buffalo	Rectum
Buffalo_10061	VC_24909	39109	Medium-quality	virulent	Uroviricota	Caudoviricetes	Caudovirales	Siphoviridae	Unassigned	Buffalo	Rectum
Buffalo_10062	VC_2452	58560	Medium-quality	uncertain_temperate	Preplasmiviricota	Tectiliviricetes	Rowavirales	Adenoviridae	Atadenovirus	Buffalo	Rectum
Buffalo_10063	VC_24910	52017	Medium-quality	uncertain_virulent	Unassigned	Unassigned	Unassigned	Unassigned	Unassigned	Buffalo	Rectum
Buffalo_10064	VC_24911	41860	Medium-quality	uncertain_temperate	Nucleocytoviricota	Pokkesviricetes	Chitovirales	Poxviridae	Betaentomopoxvirus	Buffalo	Rectum
Buffalo_10066	VC_2453	15939	Medium-quality	uncertain_temperate	Uroviricota	Caudoviricetes	Caudovirales	Podoviridae	Unassigned	Buffalo	Rectum
Buffalo_10067	VC_4027	62305	Complete	uncertain_temperate	Nucleocytoviricota	Megaviricetes	Imitervirales	Mimiviridae	Mimivirus	Buffalo	Rectum
Buffalo_10068	VC_24912	38824	Medium-quality	uncertain_temperate	Nucleocytoviricota	Megaviricetes	Imitervirales	Mimiviridae	Mimivirus	Buffalo	Rectum
Buffalo_10069	VC_24913	35474	Medium-quality	uncertain_virulent	Uroviricota	Caudoviricetes	Caudovirales	Siphoviridae	Unassigned	Buffalo	Rectum
Buffalo_10070	VC_24914	29729	Medium-quality	uncertain_virulent	Unassigned	Unassigned	Unassigned	Unassigned	Unassigned	Buffalo	Rectum
Buffalo_10071	VC_24915	91278	Medium-quality	uncertain_virulent	Nucleocytoviricota	Megaviricetes	Imitervirales	Mimiviridae	Mimivirus	Buffalo	Rectum
Buffalo_10072	VC_24916	5346	Medium-quality	virulent	Phixviricota	Malgrandaviricetes	Petitvirales	Microviridae	Unassigned	Buffalo	Rectum
Buffalo_10073	VC_24917	31821	Medium-quality	uncertain_virulent	Nucleocytoviricota	Pokkesviricetes	Chitovirales	Poxviridae	Betaentomopoxvirus	Buffalo	Rectum
Buffalo_10074	VC_24918	153945	Medium-quality	uncertain_virulent	Nucleocytoviricota	Pokkesviricetes	Chitovirales	Poxviridae	Betaentomopoxvirus	Buffalo	Rectum
Buffalo_10075	VC_24919	74973	Medium-quality	uncertain_temperate	Nucleocytoviricota	Pokkesviricetes	Chitovirales	Poxviridae	Avipoxvirus	Buffalo	Rectum
Buffalo_10076	VC_24920	33478	Medium-quality	uncertain_temperate	Uroviricota	Caudoviricetes	Caudovirales	Siphoviridae	Fromanvirus	Buffalo	Rectum
Buffalo_10077	VC_24921	39596	Medium-quality	uncertain_virulent	Uroviricota	Caudoviricetes	Caudovirales	Myoviridae	Bixzunavirus	Buffalo	Rectum
Buffalo_10078	VC_24922	39948	Medium-quality	uncertain_temperate	Uroviricota	Caudoviricetes	Caudovirales	Siphoviridae	Yuavirus	Buffalo	Rectum
Buffalo_10079	VC_4028	56884	Complete	uncertain_virulent	Unassigned	Unassigned	Unassigned	Unassigned	Unassigned	Buffalo	Rectum
Buffalo_1008	VC_4029	43323	Medium-quality	uncertain_virulent	Uroviricota	Caudoviricetes	Caudovirales	Siphoviridae	Unassigned	Buffalo	Colon
Buffalo_10080	VC_2451	37352	Medium-quality	uncertain_temperate	Unassigned	Unassigned	Unassigned	Unassigned	Unassigned	Buffalo	Rectum
Buffalo_10081	VC_24923	34368	Medium-quality	uncertain_virulent	Nucleocytoviricota	Megaviricetes	Imitervirales	Mimiviridae	Mimivirus	Buffalo	Rectum
Buffalo_10082	VC_24924	11005	Complete	uncertain_temperate	Unassigned	Unassigned	Unassigned	Unassigned	Unassigned	Buffalo	Rectum
Buffalo_10083	VC_24925	120120	Medium-quality	uncertain_virulent	Nucleocytoviricota	Pokkesviricetes	Chitovirales	Poxviridae	Betaentomopoxvirus	Buffalo	Rectum
Buffalo_10084	VC_7421	35946	Medium-quality	uncertain_temperate	Uroviricota	Caudoviricetes	Caudovirales	Siphoviridae	Unassigned	Buffalo	Rectum
Buffalo_10085	VC_24926	63322	Medium-quality	uncertain_virulent	Uroviricota	Caudoviricetes	Caudovirales	Myoviridae	Krischvirus	Buffalo	Rectum
Buffalo_10086	VC_24927	63540	Medium-quality	uncertain_virulent	Unassigned	Unassigned	Unassigned	Unassigned	Unassigned	Buffalo	Rectum
Buffalo_10087	VC_7422	32389	Medium-quality	uncertain_virulent	Unassigned	Unassigned	Unassigned	Unassigned	Unassigned	Buffalo	Rectum
Buffalo_10088	VC_24928	41897	Medium-quality	uncertain_virulent	Unassigned	Unassigned	Unassigned	Unassigned	Unassigned	Buffalo	Rectum
Buffalo_10089	VC_24929	42393	Medium-quality	uncertain_temperate	Nucleocytoviricota	Megaviricetes	Imitervirales	Mimiviridae	Mimivirus	Buffalo	Rectum
Buffalo_1009	VC_7424	47450	Medium-quality	uncertain_virulent	Unassigned	Unassigned	Unassigned	Unassigned	Unassigned	Buffalo	Colon
Buffalo_10090	VC_24930	33849	Medium-quality	uncertain_virulent	Uroviricota	Caudoviricetes	Caudovirales	Siphoviridae	Unassigned	Buffalo	Rectum
Buffalo_10091	VC_4030	137673	Medium-quality	uncertain_virulent	Uroviricota	Caudoviricetes	Caudovirales	Siphoviridae	Audreyjarvisvirus	Buffalo	Rectum
Buffalo_10092	VC_24931	33436	Medium-quality	uncertain_temperate	Uroviricota	Caudoviricetes	Caudovirales	Siphoviridae	Unassigned	Buffalo	Rectum
Buffalo_10093	VC_24932	48430	Medium-quality	uncertain_virulent	Uroviricota	Caudoviricetes	Caudovirales	Siphoviridae	Unassigned	Buffalo	Rectum
Buffalo_10094	VC_7423	32963	Medium-quality	uncertain_virulent	Unassigned	Unassigned	Unassigned	Unassigned	Unassigned	Buffalo	Rectum
Buffalo_10095	VC_4031	34652	Medium-quality	uncertain_temperate	Uroviricota	Caudoviricetes	Caudovirales	Siphoviridae	Unassigned	Buffalo	Rectum
Buffalo_10096	VC_24933	196844	High-quality	uncertain_virulent	Uroviricota	Caudoviricetes	Caudovirales	Siphoviridae	Audreyjarvisvirus	Buffalo	Rectum
Buffalo_10097	VC_24934	102278	Medium-quality	uncertain_virulent	Unassigned	Unassigned	Unassigned	Unassigned	Unassigned	Buffalo	Rectum
Buffalo_10098	VC_24935	139120	Medium-quality	uncertain_virulent	Nucleocytoviricota	Pokkesviricetes	Chitovirales	Poxviridae	Betaentomopoxvirus	Buffalo	Rectum
Buffalo_10099	VC_2454	6050	High-quality	uncertain_virulent	Phixviricota	Malgrandaviricetes	Petitvirales	Microviridae	Alphatrevirus	Buffalo	Rectum
Buffalo_1010	VC_7425	43455	Complete	uncertain_temperate	Unassigned	Naldaviricetes	Lefavirales	Baculoviridae	Alphabaculovirus	Buffalo	Colon
Buffalo_10100	VC_24936	78265	Medium-quality	uncertain_virulent	Nucleocytoviricota	Pokkesviricetes	Chitovirales	Poxviridae	Betaentomopoxvirus	Buffalo	Rectum
Buffalo_10101	VC_24937	128344	High-quality	uncertain_virulent	Unassigned	Unassigned	Unassigned	Unassigned	Unassigned	Buffalo	Rectum
Buffalo_10102	VC_24938	43476	Medium-quality	uncertain_temperate	Nucleocytoviricota	Pokkesviricetes	Chitovirales	Poxviridae	Betaentomopoxvirus	Buffalo	Rectum
Buffalo_10103	VC_24939	135830	Medium-quality	uncertain_virulent	Nucleocytoviricota	Megaviricetes	Imitervirales	Mimiviridae	Mimivirus	Buffalo	Rectum
Buffalo_10104	VC_24940	42622	Medium-quality	uncertain_temperate	Unassigned	Unassigned	Unassigned	Unassigned	Unassigned	Buffalo	Rectum
Buffalo_10105	VC_24941	46597	Medium-quality	uncertain_virulent	Uroviricota	Caudoviricetes	Caudovirales	Siphoviridae	Timquatrovirus	Buffalo	Rectum
Buffalo_10106	VC_4028	56870	Complete	uncertain_virulent	Unassigned	Unassigned	Unassigned	Unassigned	Unassigned	Buffalo	Rectum
Buffalo_10107	VC_24942	43831	Medium-quality	uncertain_virulent	Uroviricota	Caudoviricetes	Caudovirales	Siphoviridae	Unassigned	Buffalo	Rectum
Buffalo_1011	VC_4034	56452	Complete	virulent	Uroviricota	Caudoviricetes	Caudovirales	Siphoviridae	Pipefishvirus	Buffalo	Colon,Abomasum
Buffalo_10110	VC_727	45789	Medium-quality	uncertain_temperate	Nucleocytoviricota	Megaviricetes	Algavirales	Phycodnaviridae	Prasinovirus	Buffalo	Rectum
Buffalo_10111	VC_24944	167280	Complete	uncertain_temperate	Unassigned	Naldaviricetes	Lefavirales	Baculoviridae	Alphabaculovirus	Buffalo	Rectum
Buffalo_10112	VC_24945	41632	Medium-quality	uncertain_virulent	Uroviricota	Caudoviricetes	Caudovirales	Siphoviridae	Unassigned	Buffalo	Rectum
Buffalo_10113	VC_24946	43664	Medium-quality	uncertain_temperate	Uroviricota	Caudoviricetes	Caudovirales	Myoviridae	Barbavirus	Buffalo	Rectum
Buffalo_10114	VC_24947	37769	Medium-quality	uncertain_virulent	Uroviricota	Caudoviricetes	Caudovirales	Siphoviridae	Unassigned	Buffalo	Rectum
Buffalo_10115	VC_24948	41609	Medium-quality	uncertain_temperate	Nucleocytoviricota	Pokkesviricetes	Chitovirales	Poxviridae	Betaentomopoxvirus	Buffalo	Rectum
Buffalo_10116	VC_24949	17097	Medium-quality	uncertain_temperate	Unassigned	Naldaviricetes	Lefavirales	Baculoviridae	Alphabaculovirus	Buffalo	Rectum
Buffalo_10117	VC_24950	147279	Complete	uncertain_temperate	Unassigned	Naldaviricetes	Lefavirales	Baculoviridae	Alphabaculovirus	Buffalo	Rectum
Buffalo_10118	VC_4033	11722	Medium-quality	uncertain_virulent	Uroviricota	Caudoviricetes	Caudovirales	Guelinviridae	Brucesealvirus	Buffalo	Rectum
Buffalo_10119	VC_24951	36659	Medium-quality	uncertain_temperate	Uroviricota	Caudoviricetes	Caudovirales	Siphoviridae	Efquatrovirus	Buffalo	Rectum
Buffalo_1012	VC_7427	43178	Medium-quality	uncertain_temperate	Uroviricota	Caudoviricetes	Caudovirales	Siphoviridae	Fromanvirus	Buffalo	Colon
Buffalo_10121	VC_24953	35760	Medium-quality	uncertain_temperate	Nucleocytoviricota	Megaviricetes	Algavirales	Phycodnaviridae	Prasinovirus	Buffalo	Rectum
Buffalo_10122	VC_24954	121603	Medium-quality	uncertain_virulent	Nucleocytoviricota	Pokkesviricetes	Chitovirales	Poxviridae	Betaentomopoxvirus	Buffalo	Rectum
Buffalo_10123	VC_24955	22683	Medium-quality	uncertain_virulent	Unassigned	Unassigned	Unassigned	Unassigned	Unassigned	Buffalo	Rectum
Buffalo_10124	VC_24956	38717	Medium-quality	temperate	Unassigned	Unassigned	Unassigned	Unassigned	Unassigned	Buffalo	Rectum
Buffalo_10125	VC_24957	4928	Medium-quality	uncertain_virulent	Phixviricota	Malgrandaviricetes	Petitvirales	Microviridae	Unassigned	Buffalo	Rectum
Buffalo_10126	VC_24958	183079	High-quality	uncertain_virulent	Nucleocytoviricota	Megaviricetes	Imitervirales	Mimiviridae	Mimivirus	Buffalo	Rectum
Buffalo_10127	VC_7426	43595	Medium-quality	uncertain_virulent	Negarnaviricota	Ellioviricetes	Bunyavirales	Peribunyaviridae	Orthobunyavirus	Buffalo	Rectum
Buffalo_10128	VC_4035	40009	Medium-quality	temperate	Unassigned	Unassigned	Unassigned	Unassigned	Unassigned	Buffalo	Rectum
Buffalo_10129	VC_24959	73772	Medium-quality	uncertain_virulent	Unassigned	Unassigned	Unassigned	Unassigned	Unassigned	Buffalo	Rectum
Buffalo_1013	VC_18938	29550	Medium-quality	uncertain_virulent	Unassigned	Unassigned	Unassigned	Unassigned	Unassigned	Buffalo	Colon
Buffalo_10131	VC_24960	56710	Medium-quality	uncertain_temperate	Nucleocytoviricota	Pokkesviricetes	Chitovirales	Poxviridae	Betaentomopoxvirus	Buffalo	Rectum
Buffalo_10132	VC_7428	47029	Medium-quality	uncertain_temperate	Unassigned	Unassigned	Unassigned	Unassigned	Unassigned	Buffalo	Rectum
Buffalo_10133	VC_24961	128203	Medium-quality	uncertain_virulent	Unassigned	Naldaviricetes	Lefavirales	Baculoviridae	Betabaculovirus	Buffalo	Rectum
Buffalo_10134	VC_24962	16473	Medium-quality	uncertain_virulent	Uroviricota	Caudoviricetes	Caudovirales	Podoviridae	Unassigned	Buffalo	Rectum
Buffalo_10135	VC_7422	29191	Medium-quality	uncertain_virulent	Unassigned	Unassigned	Unassigned	Unassigned	Unassigned	Buffalo	Rectum
Buffalo_10136	VC_24963	17844	Medium-quality	uncertain_temperate	Cossaviricota	Quintoviricetes	Piccovirales	Parvoviridae	Iteradensovirus	Buffalo	Rectum
Buffalo_10137	VC_24964	52836	Medium-quality	uncertain_temperate	Uroviricota	Caudoviricetes	Caudovirales	Myoviridae	Tequatrovirus	Buffalo	Rectum
Buffalo_10138	VC_24965	5825	Medium-quality	uncertain_temperate	Uroviricota	Caudoviricetes	Caudovirales	Myoviridae	Felixounavirus	Buffalo	Rectum
Buffalo_10139	VC_24966	111863	Medium-quality	uncertain_virulent	Nucleocytoviricota	Pokkesviricetes	Chitovirales	Poxviridae	Betaentomopoxvirus	Buffalo	Rectum
Buffalo_1014	VC_7430	64799	High-quality	uncertain_virulent	Unassigned	Unassigned	Unassigned	Unassigned	Unassigned	Buffalo	Colon
Buffalo_10141	VC_24967	32929	Medium-quality	uncertain_temperate	Nucleocytoviricota	Pokkesviricetes	Chitovirales	Poxviridae	Betaentomopoxvirus	Buffalo	Rectum
Buffalo_10142	VC_24968	43877	Medium-quality	uncertain_virulent	Uroviricota	Caudoviricetes	Caudovirales	Siphoviridae	Unassigned	Buffalo	Rectum
Buffalo_10143	VC_381	48303	Medium-quality	uncertain_virulent	Unassigned	Unassigned	Unassigned	Unassigned	Unassigned	Buffalo	Rectum,NA
Buffalo_10144	VC_7429	6104	Medium-quality	uncertain_virulent	Uroviricota	Caudoviricetes	Caudovirales	Myoviridae	Tequatrovirus	Buffalo	Rectum
Buffalo_10145	VC_919	18708	Medium-quality	uncertain_temperate	Nucleocytoviricota	Pokkesviricetes	Chitovirales	Poxviridae	Orthopoxvirus	Buffalo	Rectum
Buffalo_10146	VC_24969	117210	Medium-quality	uncertain_temperate	Nucleocytoviricota	Megaviricetes	Imitervirales	Mimiviridae	Mimivirus	Buffalo	Rectum
Buffalo_10147	VC_24970	42029	Medium-quality	uncertain_virulent	Uroviricota	Caudoviricetes	Caudovirales	Siphoviridae	Unassigned	Buffalo	Rectum
Buffalo_10148	VC_24971	33589	Medium-quality	uncertain_temperate	Uroviricota	Caudoviricetes	Caudovirales	Siphoviridae	Fromanvirus	Buffalo	Rectum
Buffalo_10149	VC_24972	70554	Medium-quality	uncertain_temperate	Unassigned	Unassigned	Unassigned	Unassigned	Unassigned	Buffalo	Rectum
Buffalo_1015	VC_7431	43025	Medium-quality	uncertain_temperate	Nucleocytoviricota	Pokkesviricetes	Chitovirales	Poxviridae	Betaentomopoxvirus	Buffalo	Colon,Abomasum
Buffalo_10150	VC_1676	12676	Medium-quality	uncertain_virulent	Unassigned	Unassigned	Unassigned	Polydnaviriformidae	Ichnoviriform	Buffalo	Rectum
Buffalo_10151	VC_24973	54867	Medium-quality	uncertain_temperate	Nucleocytoviricota	Megaviricetes	Imitervirales	Mimiviridae	Mimivirus	Buffalo	Rectum
Buffalo_10152	VC_24974	42115	Medium-quality	uncertain_temperate	Uroviricota	Caudoviricetes	Caudovirales	Myoviridae	Tegunavirus	Buffalo	Rectum
Buffalo_10153	VC_24975	77138	Medium-quality	uncertain_temperate	Unassigned	Unassigned	Unassigned	Unassigned	Unassigned	Buffalo	Rectum
Buffalo_10154	VC_4036	6504	Complete	uncertain_virulent	Phixviricota	Malgrandaviricetes	Petitvirales	Microviridae	Unassigned	Buffalo	Rectum
Buffalo_10155	VC_24976	36704	Medium-quality	uncertain_virulent	Unassigned	Unassigned	Unassigned	Unassigned	Unassigned	Buffalo	Rectum
Buffalo_10156	VC_24977	43057	Medium-quality	uncertain_virulent	Unassigned	Unassigned	Unassigned	Unassigned	Unassigned	Buffalo	Rectum
Buffalo_10157	VC_1677	5024	Medium-quality	uncertain_virulent	Phixviricota	Malgrandaviricetes	Petitvirales	Microviridae	Unassigned	Buffalo	Rectum
Buffalo_10158	VC_317	5902	Complete	uncertain_virulent	Unassigned	Unassigned	Unassigned	Unassigned	Unassigned	Buffalo	Rectum
Buffalo_1016	VC_7433	38449	Medium-quality	uncertain_temperate	Unassigned	Unassigned	Unassigned	Unassigned	Unassigned	Buffalo	Colon,Abomasum
Buffalo_10160	VC_24978	39371	Medium-quality	uncertain_temperate	Uroviricota	Caudoviricetes	Caudovirales	Siphoviridae	Unassigned	Buffalo	Rectum
Buffalo_10161	VC_7432	31576	Medium-quality	temperate	Uroviricota	Caudoviricetes	Caudovirales	Siphoviridae	Moineauvirus	Buffalo	Rectum
Buffalo_10162	VC_24979	37863	Medium-quality	uncertain_temperate	Uroviricota	Caudoviricetes	Caudovirales	Siphoviridae	Unassigned	Buffalo	Rectum
Buffalo_10163	VC_24980	17593	Medium-quality	uncertain_temperate	Nucleocytoviricota	Megaviricetes	Imitervirales	Mimiviridae	Mimivirus	Buffalo	Rectum
Buffalo_10164	VC_24981	50633	Medium-quality	uncertain_temperate	Uroviricota	Caudoviricetes	Caudovirales	Siphoviridae	Wbetavirus	Buffalo	Rectum
Buffalo_10165	VC_24982	30037	Medium-quality	uncertain_virulent	Unassigned	Naldaviricetes	Lefavirales	Baculoviridae	Alphabaculovirus	Buffalo	Rectum
Buffalo_10166	VC_24983	18232	Medium-quality	uncertain_temperate	Uroviricota	Caudoviricetes	Caudovirales	Salasmaviridae	Bundooravirus	Buffalo	Rectum
Buffalo_10168	VC_24984	11699	Medium-quality	uncertain_virulent	Unassigned	Unassigned	Unassigned	Unassigned	Unassigned	Buffalo	Rectum
Buffalo_10169	VC_4037	35402	Medium-quality	virulent	Nucleocytoviricota	Megaviricetes	Imitervirales	Mimiviridae	Mimivirus	Buffalo	Rectum
Buffalo_1017	VC_7435	38736	Medium-quality	uncertain_temperate	Nucleocytoviricota	Megaviricetes	Imitervirales	Mimiviridae	Mimivirus	Buffalo	Colon
Buffalo_10170	VC_7434	66908	Medium-quality	uncertain_temperate	Nucleocytoviricota	Pokkesviricetes	Chitovirales	Poxviridae	Betaentomopoxvirus	Buffalo	Rectum
Buffalo_10172	VC_24985	33588	Medium-quality	uncertain_temperate	Unassigned	Naldaviricetes	Lefavirales	Baculoviridae	Alphabaculovirus	Buffalo	Rectum
Buffalo_10173	VC_24986	32767	Medium-quality	uncertain_virulent	Uroviricota	Caudoviricetes	Caudovirales	Siphoviridae	Samistivirus	Buffalo	Rectum
Buffalo_10174	VC_24987	33689	Medium-quality	uncertain_temperate	Nucleocytoviricota	Pokkesviricetes	Chitovirales	Poxviridae	Avipoxvirus	Buffalo	Rectum
Buffalo_10175	VC_24988	52618	Medium-quality	uncertain_virulent	Nucleocytoviricota	Megaviricetes	Imitervirales	Mimiviridae	Mimivirus	Buffalo	Rectum
Buffalo_10176	VC_4031	34033	Medium-quality	uncertain_temperate	Uroviricota	Caudoviricetes	Caudovirales	Siphoviridae	Unassigned	Buffalo	Rectum
Buffalo_10177	VC_24989	71884	Medium-quality	uncertain_virulent	Unassigned	Unassigned	Unassigned	Unassigned	Unassigned	Buffalo	Rectum
Buffalo_10178	VC_24990	50728	Medium-quality	uncertain_temperate	Pisuviricota	Pisoniviricetes	Nidovirales	Coronaviridae	Alphacoronavirus	Buffalo	Rectum
Buffalo_10180	VC_24991	6006	Medium-quality	uncertain_virulent	Unassigned	Unassigned	Unassigned	Unassigned	Unassigned	Buffalo	Rectum
Buffalo_10181	VC_7436	14296	Medium-quality	uncertain_virulent	Nucleocytoviricota	Pokkesviricetes	Chitovirales	Poxviridae	Betaentomopoxvirus	Buffalo	Rectum
Buffalo_10182	VC_24992	32948	Medium-quality	uncertain_temperate	Unassigned	Unassigned	Unassigned	Unassigned	Unassigned	Buffalo	Rectum
Buffalo_10183	VC_4038	80367	Medium-quality	uncertain_virulent	Uroviricota	Caudoviricetes	Caudovirales	Demerecviridae	Cetovirus	Buffalo	Rectum
Buffalo_10184	VC_24993	43756	Medium-quality	uncertain_virulent	Unassigned	Unassigned	Unassigned	Polydnaviriformidae	Ichnoviriform	Buffalo	Rectum
Buffalo_10185	VC_24994	74033	Complete	virulent	Unassigned	Naldaviricetes	Lefavirales	Baculoviridae	Betabaculovirus	Buffalo	Rectum
Buffalo_10186	VC_24995	36060	Medium-quality	uncertain_temperate	Nucleocytoviricota	Megaviricetes	Imitervirales	Mimiviridae	Mimivirus	Buffalo	Rectum
Buffalo_10187	VC_7437	62220	Medium-quality	uncertain_virulent	Uroviricota	Caudoviricetes	Caudovirales	Myoviridae	Tequatrovirus	Buffalo	Rectum
Buffalo_10188	VC_24996	5663	Complete	uncertain_temperate	Phixviricota	Malgrandaviricetes	Petitvirales	Microviridae	Unassigned	Buffalo	Rectum
Buffalo_10189	VC_1166	45040	Medium-quality	uncertain_temperate	Uroviricota	Caudoviricetes	Caudovirales	Siphoviridae	Fromanvirus	Buffalo	Rectum
Buffalo_1019	VC_18939	51811	Medium-quality	uncertain_virulent	Uroviricota	Caudoviricetes	Caudovirales	Herelleviridae	Bastillevirus	Buffalo	Colon
Buffalo_10190	VC_7439	5341	Medium-quality	virulent	Unassigned	Unassigned	Unassigned	Unassigned	Unassigned	Buffalo	Rectum
Buffalo_10191	VC_24997	6509	Medium-quality	uncertain_virulent	Unassigned	Unassigned	Unassigned	Unassigned	Unassigned	Buffalo	Rectum
Buffalo_10192	VC_24998	38548	Medium-quality	uncertain_virulent	Uroviricota	Caudoviricetes	Caudovirales	Siphoviridae	Unassigned	Buffalo	Rectum
Buffalo_10193	VC_4039	37881	Medium-quality	uncertain_temperate	Uroviricota	Caudoviricetes	Caudovirales	Siphoviridae	Unassigned	Buffalo	Rectum
Buffalo_10194	VC_24999	63516	Medium-quality	virulent	Nucleocytoviricota	Megaviricetes	Imitervirales	Mimiviridae	Mimivirus	Buffalo	Rectum
Buffalo_10195	VC_25000	16189	Medium-quality	uncertain_virulent	Uroviricota	Caudoviricetes	Caudovirales	Podoviridae	Unassigned	Buffalo	Rectum
Buffalo_10196	VC_25001	38724	Medium-quality	uncertain_temperate	Nucleocytoviricota	Megaviricetes	Algavirales	Phycodnaviridae	Prasinovirus	Buffalo	Rectum
Buffalo_10197	VC_25002	38450	Medium-quality	uncertain_temperate	Uroviricota	Caudoviricetes	Caudovirales	Siphoviridae	Coventryvirus	Buffalo	Rectum
Buffalo_10198	VC_25003	45016	Medium-quality	uncertain_temperate	Unassigned	Naldaviricetes	Lefavirales	Baculoviridae	Alphabaculovirus	Buffalo	Rectum
Buffalo_102	VC_18465	33698	Medium-quality	uncertain_temperate	Uroviricota	Caudoviricetes	Caudovirales	Myoviridae	Tequatrovirus	Buffalo	Rectum
Buffalo_10200	VC_25004	108814	High-quality	uncertain_virulent	Unassigned	Unassigned	Unassigned	Unassigned	Unassigned	Buffalo	Rectum
Buffalo_10202	VC_7434	66073	Medium-quality	uncertain_temperate	Nucleocytoviricota	Pokkesviricetes	Chitovirales	Poxviridae	Betaentomopoxvirus	Buffalo	Rectum
Buffalo_10203	VC_25005	30970	Medium-quality	uncertain_temperate	Unassigned	Unassigned	Unassigned	Unassigned	Unassigned	Buffalo	Rectum
Buffalo_10204	VC_25006	6566	High-quality	virulent	Phixviricota	Malgrandaviricetes	Petitvirales	Microviridae	Unassigned	Buffalo	Rectum
Buffalo_10205	VC_25007	41233	Medium-quality	temperate	Nucleocytoviricota	Pokkesviricetes	Chitovirales	Poxviridae	Betaentomopoxvirus	Buffalo	Rectum
Buffalo_10206	VC_25008	167365	Medium-quality	uncertain_temperate	Unassigned	Unassigned	Unassigned	Polydnaviriformidae	Bracoviriform	Buffalo	Rectum
Buffalo_10207	VC_25009	36382	Medium-quality	uncertain_virulent	Uroviricota	Caudoviricetes	Caudovirales	Siphoviridae	Timquatrovirus	Buffalo	Rectum
Buffalo_10208	VC_25010	62102	Medium-quality	uncertain_temperate	Nucleocytoviricota	Pokkesviricetes	Chitovirales	Poxviridae	Orthopoxvirus	Buffalo	Rectum
Buffalo_10209	VC_25011	33760	Medium-quality	uncertain_virulent	Uroviricota	Caudoviricetes	Caudovirales	Myoviridae	Machinavirus	Buffalo	Rectum
Buffalo_1021	VC_18940	5142	Medium-quality	uncertain_virulent	Phixviricota	Malgrandaviricetes	Petitvirales	Microviridae	Unassigned	Buffalo	Colon
Buffalo_10210	VC_25012	62798	Medium-quality	uncertain_virulent	Uroviricota	Caudoviricetes	Caudovirales	Myoviridae	Naesvirus	Buffalo	Rectum
Buffalo_10211	VC_25013	6278	Medium-quality	virulent	Uroviricota	Caudoviricetes	Caudovirales	Ackermannviridae	Kuttervirus	Buffalo	Rectum
Buffalo_10212	VC_25014	37433	Medium-quality	uncertain_temperate	Unassigned	Unassigned	Unassigned	Unassigned	Unassigned	Buffalo	Rectum
Buffalo_10213	VC_25015	18667	Medium-quality	uncertain_virulent	Uroviricota	Caudoviricetes	Caudovirales	Podoviridae	Unassigned	Buffalo	Rectum
Buffalo_10214	VC_4041	35616	Medium-quality	uncertain_temperate	Uroviricota	Caudoviricetes	Caudovirales	Siphoviridae	Unassigned	Buffalo	Rectum
Buffalo_10215	VC_25016	39216	Medium-quality	uncertain_virulent	Uroviricota	Caudoviricetes	Caudovirales	Siphoviridae	Unassigned	Buffalo	Rectum
Buffalo_10216	VC_25017	45421	Medium-quality	uncertain_virulent	Unassigned	Unassigned	Unassigned	Unassigned	Unassigned	Buffalo	Rectum
Buffalo_10217	VC_25018	145739	Medium-quality	uncertain_virulent	Nucleocytoviricota	Pokkesviricetes	Chitovirales	Poxviridae	Betaentomopoxvirus	Buffalo	Rectum
Buffalo_10218	VC_25019	20836	Medium-quality	uncertain_virulent	Uroviricota	Caudoviricetes	Caudovirales	Herelleviridae	Bequatrovirus	Buffalo	Rectum
Buffalo_10219	VC_25020	117128	Medium-quality	uncertain_virulent	Nucleocytoviricota	Megaviricetes	Imitervirales	Mimiviridae	Mimivirus	Buffalo	Rectum
Buffalo_1022	VC_4042	33108	Medium-quality	uncertain_virulent	Unassigned	Unassigned	Unassigned	Unassigned	Unassigned	Buffalo	Colon,Rumen,Reticulum
Buffalo_10220	VC_25021	40927	Medium-quality	uncertain_virulent	Unassigned	Unassigned	Unassigned	Unassigned	Unassigned	Buffalo	Rectum
Buffalo_10222	VC_25022	59176	Medium-quality	virulent	Unassigned	Naldaviricetes	Lefavirales	Nudiviridae	Alphanudivirus	Buffalo	Rectum
Buffalo_10223	VC_25023	51235	Medium-quality	uncertain_virulent	Nucleocytoviricota	Pokkesviricetes	Chitovirales	Poxviridae	Betaentomopoxvirus	Buffalo	Rectum
Buffalo_10225	VC_4028	57133	Medium-quality	uncertain_virulent	Unassigned	Unassigned	Unassigned	Unassigned	Unassigned	Buffalo	Rectum
Buffalo_10226	VC_25024	43469	Medium-quality	uncertain_temperate	Unassigned	Unassigned	Unassigned	Unassigned	Unassigned	Buffalo	Rectum
Buffalo_10228	VC_25025	41018	Medium-quality	uncertain_temperate	Uroviricota	Caudoviricetes	Caudovirales	Siphoviridae	Pahexavirus	Buffalo	Rectum
Buffalo_10229	VC_25026	31490	Medium-quality	uncertain_temperate	Uroviricota	Caudoviricetes	Caudovirales	Siphoviridae	Unassigned	Buffalo	Rectum
Buffalo_1023	VC_18941	45060	Medium-quality	uncertain_temperate	Uroviricota	Caudoviricetes	Caudovirales	Siphoviridae	Unassigned	Buffalo	Colon
Buffalo_10230	VC_25027	14391	Medium-quality	uncertain_virulent	Uroviricota	Caudoviricetes	Caudovirales	Demerecviridae	Cetovirus	Buffalo	Rectum
Buffalo_10231	VC_25028	32584	Medium-quality	uncertain_temperate	Uroviricota	Caudoviricetes	Caudovirales	Siphoviridae	Fromanvirus	Buffalo	Rectum
Buffalo_10232	VC_25029	43022	Medium-quality	uncertain_temperate	Duplornaviricota	Resentoviricetes	Reovirales	Reoviridae	Orbivirus	Buffalo	Rectum
Buffalo_10234	VC_25030	5276	Medium-quality	uncertain_temperate	Phixviricota	Malgrandaviricetes	Petitvirales	Microviridae	Unassigned	Buffalo	Rectum
Buffalo_10235	VC_25031	117292	Medium-quality	uncertain_virulent	Nucleocytoviricota	Pokkesviricetes	Chitovirales	Poxviridae	Betaentomopoxvirus	Buffalo	Rectum
Buffalo_10236	VC_25032	46783	Medium-quality	temperate	Uroviricota	Caudoviricetes	Caudovirales	Siphoviridae	Unassigned	Buffalo	Rectum
Buffalo_10238	VC_25033	138083	Medium-quality	uncertain_virulent	Uroviricota	Caudoviricetes	Caudovirales	Siphoviridae	Audreyjarvisvirus	Buffalo	Rectum
Buffalo_10239	VC_17122	49746	Medium-quality	virulent	Uroviricota	Caudoviricetes	Caudovirales	Siphoviridae	Unassigned	Buffalo	Rectum
Buffalo_1024	VC_7443	40726	Medium-quality	virulent	Uroviricota	Caudoviricetes	Caudovirales	Siphoviridae	Unassigned	Buffalo	Colon
Buffalo_10240	VC_25034	33807	Medium-quality	uncertain_temperate	Unassigned	Unassigned	Unassigned	Unassigned	Unassigned	Buffalo	Rectum
Buffalo_10241	VC_25035	52039	Medium-quality	uncertain_temperate	Kitrinoviricota	Alsuviricetes	Tymovirales	Betaflexiviridae	Carlavirus	Buffalo	Rectum
Buffalo_10242	VC_25036	132942	Medium-quality	uncertain_virulent	Unassigned	Naldaviricetes	Lefavirales	Baculoviridae	Alphabaculovirus	Buffalo	Rectum
Buffalo_10243	VC_25037	16575	Medium-quality	uncertain_virulent	Uroviricota	Caudoviricetes	Caudovirales	Myoviridae	Gaprivervirus	Buffalo	Rectum
Buffalo_10244	VC_25038	40668	Medium-quality	uncertain_temperate	Unassigned	Unassigned	Unassigned	Unassigned	Unassigned	Buffalo	Rectum
Buffalo_10245	VC_25039	17177	Medium-quality	uncertain_virulent	Uroviricota	Caudoviricetes	Caudovirales	Podoviridae	Unassigned	Buffalo	Rectum
Buffalo_10248	VC_25040	41104	Medium-quality	uncertain_temperate	Nucleocytoviricota	Megaviricetes	Imitervirales	Mimiviridae	Mimivirus	Buffalo	Rectum
Buffalo_10249	VC_25041	38197	Medium-quality	uncertain_virulent	Unassigned	Unassigned	Unassigned	Unassigned	Unassigned	Buffalo	Rectum
Buffalo_1025	VC_18942	46436	Medium-quality	uncertain_virulent	Peploviricota	Herviviricetes	Herpesvirales	Alloherpesviridae	Cyprinivirus	Buffalo	Colon
Buffalo_10251	VC_25042	24727	Medium-quality	uncertain_temperate	Uroviricota	Caudoviricetes	Caudovirales	Podoviridae	Unassigned	Buffalo	Rectum
Buffalo_10252	VC_25043	35585	Medium-quality	uncertain_temperate	Unassigned	Unassigned	Unassigned	Unassigned	Unassigned	Buffalo	Rectum
Buffalo_10253	VC_25044	32273	Medium-quality	temperate	Uroviricota	Caudoviricetes	Caudovirales	Herelleviridae	Silviavirus	Buffalo	Rectum
Buffalo_10254	VC_25045	34271	Medium-quality	uncertain_virulent	Uroviricota	Caudoviricetes	Caudovirales	Siphoviridae	Audreyjarvisvirus	Buffalo	Rectum
Buffalo_10255	VC_25046	187202	High-quality	uncertain_virulent	Nucleocytoviricota	Megaviricetes	Imitervirales	Mimiviridae	Mimivirus	Buffalo	Rectum
Buffalo_10256	VC_25047	44466	Medium-quality	uncertain_temperate	Unassigned	Unassigned	Unassigned	Unassigned	Unassigned	Buffalo	Rectum
Buffalo_10257	VC_25048	10817	Medium-quality	uncertain_virulent	Unassigned	Unassigned	Unassigned	Unassigned	Unassigned	Buffalo	Rectum
Buffalo_10258	VC_25049	85338	Medium-quality	virulent	Nucleocytoviricota	Pokkesviricetes	Chitovirales	Poxviridae	Betaentomopoxvirus	Buffalo	Rectum
Buffalo_10259	VC_25050	43010	Medium-quality	uncertain_virulent	Uroviricota	Caudoviricetes	Caudovirales	Siphoviridae	Unassigned	Buffalo	Rectum
Buffalo_1026	VC_18943	69098	Medium-quality	uncertain_virulent	Unassigned	Unassigned	Unassigned	Unassigned	Unassigned	Buffalo	Colon
Buffalo_10261	VC_4044	41186	Medium-quality	uncertain_temperate	Uroviricota	Caudoviricetes	Caudovirales	Myoviridae	Tequatrovirus	Buffalo	Rectum
Buffalo_10262	VC_25051	52342	Medium-quality	uncertain_virulent	Duplornaviricota	Chrymotiviricetes	Ghabrivirales	Chrysoviridae	Alphachrysovirus	Buffalo	Rectum
Buffalo_10263	VC_2456	14949	Medium-quality	uncertain_virulent	Unassigned	Unassigned	Unassigned	Unassigned	Unassigned	Buffalo	Rectum
Buffalo_10264	VC_25052	23591	Medium-quality	uncertain_temperate	Unassigned	Unassigned	Unassigned	Unassigned	Unassigned	Buffalo	Rectum
Buffalo_10265	VC_25053	54646	Medium-quality	uncertain_virulent	Nucleocytoviricota	Megaviricetes	Imitervirales	Mimiviridae	Mimivirus	Buffalo	Rectum
Buffalo_10266	VC_25054	38369	Medium-quality	uncertain_virulent	Pisuviricota	Pisoniviricetes	Picornavirales	Secoviridae	Waikavirus	Buffalo	Rectum
Buffalo_10267	VC_381	48944	Medium-quality	uncertain_temperate	Nucleocytoviricota	Megaviricetes	Imitervirales	Mimiviridae	Mimivirus	Buffalo	Rectum
Buffalo_10268	VC_25055	102571	Medium-quality	uncertain_virulent	Nucleocytoviricota	Pokkesviricetes	Chitovirales	Poxviridae	Betaentomopoxvirus	Buffalo	Rectum
Buffalo_10269	VC_25056	51541	Medium-quality	uncertain_virulent	Unassigned	Unassigned	Unassigned	Unassigned	Unassigned	Buffalo	Rectum
Buffalo_1027	VC_18944	48615	Medium-quality	virulent	Unassigned	Unassigned	Unassigned	Unassigned	Unassigned	Buffalo	Colon
Buffalo_10270	VC_25057	37660	Medium-quality	uncertain_temperate	Uroviricota	Caudoviricetes	Caudovirales	Siphoviridae	Fromanvirus	Buffalo	Rectum
Buffalo_10271	VC_25058	38375	Medium-quality	uncertain_temperate	Nucleocytoviricota	Megaviricetes	Algavirales	Phycodnaviridae	Prasinovirus	Buffalo	Rectum
Buffalo_10273	VC_25059	38608	Medium-quality	uncertain_temperate	Unassigned	Unassigned	Unassigned	Unassigned	Unassigned	Buffalo	Rectum
Buffalo_10274	VC_25060	15616	Medium-quality	virulent	Uroviricota	Caudoviricetes	Caudovirales	Podoviridae	Unassigned	Buffalo	Rectum
Buffalo_10276	VC_25061	48651	Medium-quality	uncertain_virulent	Unassigned	Unassigned	Unassigned	Unassigned	Unassigned	Buffalo	Rectum
Buffalo_10277	VC_25062	163877	Complete	uncertain_virulent	Uroviricota	Caudoviricetes	Caudovirales	Herelleviridae	Schiekvirus	Buffalo	Rectum
Buffalo_10278	VC_25063	53609	Medium-quality	virulent	Uroviricota	Caudoviricetes	Caudovirales	Herelleviridae	Silviavirus	Buffalo	Rectum
Buffalo_10279	VC_7440	41961	Medium-quality	uncertain_virulent	Uroviricota	Caudoviricetes	Caudovirales	Siphoviridae	Rockefellervirus	Buffalo	Rectum
Buffalo_1028	VC_729	40010	Medium-quality	uncertain_virulent	Unassigned	Unassigned	Unassigned	Unassigned	Unassigned	Buffalo	Colon,Cecum
Buffalo_10280	VC_25064	56748	Complete	uncertain_virulent	Unassigned	Unassigned	Unassigned	Unassigned	Unassigned	Buffalo	Rectum
Buffalo_10281	VC_4027	62315	Complete	uncertain_temperate	Nucleocytoviricota	Megaviricetes	Imitervirales	Mimiviridae	Mimivirus	Buffalo	Rectum
Buffalo_10282	VC_4045	40855	Medium-quality	uncertain_virulent	Uroviricota	Caudoviricetes	Caudovirales	Siphoviridae	Samwavirus	Buffalo	Rectum
Buffalo_10283	VC_728	5623	Complete	uncertain_temperate	Phixviricota	Malgrandaviricetes	Petitvirales	Microviridae	Unassigned	Buffalo	Rectum
Buffalo_10284	VC_25065	39658	Medium-quality	uncertain_temperate	Unassigned	Naldaviricetes	Lefavirales	Baculoviridae	Alphabaculovirus	Buffalo	Rectum
Buffalo_10285	VC_25066	39177	Medium-quality	virulent	Uroviricota	Caudoviricetes	Caudovirales	Siphoviridae	Kenoshavirus	Buffalo	Rectum
Buffalo_10286	VC_25067	58020	Medium-quality	uncertain_virulent	Unassigned	Naldaviricetes	Lefavirales	Baculoviridae	Betabaculovirus	Buffalo	Rectum
Buffalo_10287	VC_25068	27847	Medium-quality	uncertain_temperate	Uroviricota	Caudoviricetes	Caudovirales	Siphoviridae	Unassigned	Buffalo	Rectum
Buffalo_10288	VC_25069	88587	Medium-quality	uncertain_virulent	Uroviricota	Caudoviricetes	Caudovirales	Siphoviridae	Shapirovirus	Buffalo	Rectum
Buffalo_10289	VC_25070	35613	Medium-quality	uncertain_virulent	Uroviricota	Caudoviricetes	Caudovirales	Herelleviridae	Pecentumvirus	Buffalo	Rectum
Buffalo_1029	VC_18945	37591	Medium-quality	uncertain_temperate	Uroviricota	Caudoviricetes	Caudovirales	Siphoviridae	Phietavirus	Buffalo	Colon
Buffalo_10290	VC_25071	5619	Medium-quality	virulent	Phixviricota	Malgrandaviricetes	Petitvirales	Microviridae	Unassigned	Buffalo	Rectum
Buffalo_10291	VC_4046	59500	Medium-quality	uncertain_virulent	Uroviricota	Caudoviricetes	Caudovirales	Siphoviridae	Junavirus	Buffalo	Rectum
Buffalo_10292	VC_7444	26173	Medium-quality	uncertain_virulent	Uroviricota	Caudoviricetes	Caudovirales	Siphoviridae	Unassigned	Buffalo	Rectum
Buffalo_10293	VC_25072	28119	Medium-quality	uncertain_virulent	Uroviricota	Caudoviricetes	Caudovirales	Siphoviridae	Fromanvirus	Buffalo	Rectum
Buffalo_10295	VC_2457	33128	Medium-quality	uncertain_virulent	Nucleocytoviricota	Pokkesviricetes	Chitovirales	Poxviridae	Betaentomopoxvirus	Buffalo	Rectum
Buffalo_10296	VC_25073	12585	Medium-quality	uncertain_virulent	Unassigned	Unassigned	Unassigned	Unassigned	Unassigned	Buffalo	Rectum
Buffalo_10297	VC_25074	27753	Medium-quality	uncertain_temperate	Uroviricota	Caudoviricetes	Caudovirales	Siphoviridae	Unassigned	Buffalo	Rectum
Buffalo_10298	VC_25075	36989	Medium-quality	uncertain_virulent	Unassigned	Unassigned	Unassigned	Unassigned	Unassigned	Buffalo	Rectum
Buffalo_10299	VC_25076	15033	Medium-quality	uncertain_virulent	Unassigned	Unassigned	Unassigned	Unassigned	Unassigned	Buffalo	Rectum
Buffalo_103	VC_18466	43229	Medium-quality	uncertain_virulent	Uroviricota	Caudoviricetes	Caudovirales	Herelleviridae	Wphvirus	Buffalo	Rectum
Buffalo_1030	VC_7447	59067	Medium-quality	uncertain_temperate	Uroviricota	Caudoviricetes	Caudovirales	Myoviridae	Schizotequatrovirus	Buffalo	Colon
Buffalo_10301	VC_25077	46685	Medium-quality	uncertain_temperate	Uroviricota	Caudoviricetes	Caudovirales	Myoviridae	Lubbockvirus	Buffalo	Rectum
Buffalo_10302	VC_25078	32636	Medium-quality	uncertain_temperate	Uroviricota	Caudoviricetes	Caudovirales	Siphoviridae	Vedamuthuvirus	Buffalo	Rectum
Buffalo_10303	VC_25079	34274	Medium-quality	uncertain_temperate	Negarnaviricota	Ellioviricetes	Bunyavirales	Tospoviridae	Orthotospovirus	Buffalo	Rectum
Buffalo_10304	VC_25080	5729	Medium-quality	uncertain_virulent	Phixviricota	Malgrandaviricetes	Petitvirales	Microviridae	Unassigned	Buffalo	Rectum
Buffalo_10305	VC_25081	17812	Medium-quality	virulent	Uroviricota	Caudoviricetes	Caudovirales	Podoviridae	Unassigned	Buffalo	Rectum
Buffalo_10306	VC_25082	54206	Medium-quality	uncertain_virulent	Unassigned	Unassigned	Unassigned	Unassigned	Unassigned	Buffalo	Rectum
Buffalo_10307	VC_7446	53477	Medium-quality	uncertain_virulent	Unassigned	Unassigned	Unassigned	Unassigned	Unassigned	Buffalo	Rectum
Buffalo_10308	VC_25083	38074	Medium-quality	uncertain_temperate	Uroviricota	Caudoviricetes	Caudovirales	Siphoviridae	Unassigned	Buffalo	Rectum
Buffalo_10309	VC_25084	19330	Medium-quality	uncertain_virulent	Uroviricota	Caudoviricetes	Caudovirales	Podoviridae	Unassigned	Buffalo	Rectum
Buffalo_1031	VC_7449	122104	Medium-quality	uncertain_temperate	Nucleocytoviricota	Megaviricetes	Imitervirales	Mimiviridae	Mimivirus	Buffalo	Colon
Buffalo_10310	VC_25085	16442	Medium-quality	uncertain_virulent	Uroviricota	Caudoviricetes	Caudovirales	Podoviridae	Unassigned	Buffalo	Rectum
Buffalo_10311	VC_25086	62502	Medium-quality	uncertain_temperate	Unassigned	Unassigned	Unassigned	Unassigned	Unassigned	Buffalo	Rectum
Buffalo_10312	VC_25087	42551	Medium-quality	uncertain_temperate	Unassigned	Unassigned	Unassigned	Unassigned	Unassigned	Buffalo	Rectum
Buffalo_10313	VC_25088	32441	Medium-quality	uncertain_temperate	Uroviricota	Caudoviricetes	Caudovirales	Siphoviridae	Unassigned	Buffalo	Rectum
Buffalo_10314	VC_25089	31797	Medium-quality	uncertain_temperate	Unassigned	Unassigned	Unassigned	Unassigned	Unassigned	Buffalo	Rectum
Buffalo_10316	VC_2459	40508	Medium-quality	virulent	Uroviricota	Caudoviricetes	Caudovirales	Siphoviridae	Fromanvirus	Buffalo	Rectum
Buffalo_10317	VC_7448	51995	Medium-quality	temperate	Unassigned	Naldaviricetes	Lefavirales	Baculoviridae	Alphabaculovirus	Buffalo	Rectum
Buffalo_10318	VC_25090	34429	Medium-quality	uncertain_temperate	Unassigned	Unassigned	Unassigned	Unassigned	Unassigned	Buffalo	Rectum
Buffalo_1032	VC_18946	33464	Medium-quality	uncertain_virulent	Uroviricota	Caudoviricetes	Caudovirales	Rountreeviridae	Copernicusvirus	Buffalo	Colon
Buffalo_10320	VC_25091	16980	Medium-quality	uncertain_temperate	Nucleocytoviricota	Pokkesviricetes	Chitovirales	Poxviridae	Betaentomopoxvirus	Buffalo	Rectum
Buffalo_10321	VC_25092	38507	Medium-quality	uncertain_virulent	Preplasmiviricota	Tectiliviricetes	Rowavirales	Adenoviridae	Mastadenovirus	Buffalo	Rectum
Buffalo_10322	VC_25093	34295	Medium-quality	uncertain_virulent	Uroviricota	Caudoviricetes	Caudovirales	Siphoviridae	Unassigned	Buffalo	Rectum
Buffalo_10323	VC_25094	102164	Medium-quality	uncertain_virulent	Unassigned	Naldaviricetes	Lefavirales	Baculoviridae	Alphabaculovirus	Buffalo	Rectum
Buffalo_10324	VC_25095	67140	Medium-quality	uncertain_temperate	Nucleocytoviricota	Megaviricetes	Imitervirales	Mimiviridae	Mimivirus	Buffalo	Rectum
Buffalo_10325	VC_25096	35592	Medium-quality	uncertain_temperate	Peploviricota	Herviviricetes	Herpesvirales	Herpesviridae	Muromegalovirus	Buffalo	Rectum
Buffalo_10326	VC_25097	41483	Medium-quality	uncertain_virulent	Uroviricota	Caudoviricetes	Caudovirales	Siphoviridae	Cequinquevirus	Buffalo	Rectum
Buffalo_10327	VC_25098	5937	Medium-quality	virulent	Nucleocytoviricota	Pokkesviricetes	Chitovirales	Poxviridae	Betaentomopoxvirus	Buffalo	Rectum
Buffalo_10328	VC_25099	41383	Medium-quality	uncertain_virulent	Uroviricota	Caudoviricetes	Caudovirales	Siphoviridae	Fromanvirus	Buffalo	Rectum
Buffalo_10329	VC_25100	47988	Medium-quality	uncertain_virulent	Uroviricota	Caudoviricetes	Caudovirales	Herelleviridae	Siminovitchvirus	Buffalo	Rectum
Buffalo_1033	VC_18947	36646	Medium-quality	uncertain_temperate	Uroviricota	Caudoviricetes	Unassigned	Casjensviridae	Chivirus	Buffalo	Colon
Buffalo_10330	VC_25101	11709	High-quality	uncertain_temperate	Unassigned	Unassigned	Unassigned	Unassigned	Unassigned	Buffalo	Rectum
Buffalo_10331	VC_25102	18423	Medium-quality	virulent	Uroviricota	Caudoviricetes	Caudovirales	Myoviridae	Gaprivervirus	Buffalo	Rectum
Buffalo_10332	VC_25103	16755	Medium-quality	uncertain_virulent	Uroviricota	Caudoviricetes	Caudovirales	Siphoviridae	Skunavirus	Buffalo	Rectum
Buffalo_10333	VC_25104	31323	Medium-quality	uncertain_virulent	Unassigned	Unassigned	Unassigned	Unassigned	Unassigned	Buffalo	Rectum
Buffalo_10334	VC_25105	36113	Medium-quality	uncertain_temperate	Unassigned	Unassigned	Unassigned	Unassigned	Unassigned	Buffalo	Rectum
Buffalo_10335	VC_25106	37781	Medium-quality	uncertain_virulent	Uroviricota	Caudoviricetes	Caudovirales	Siphoviridae	Omegavirus	Buffalo	Rectum
Buffalo_10337	VC_25107	41697	Medium-quality	uncertain_temperate	Uroviricota	Caudoviricetes	Caudovirales	Siphoviridae	Fromanvirus	Buffalo	Rectum
Buffalo_10338	VC_25108	57762	Medium-quality	uncertain_virulent	Unassigned	Naldaviricetes	Lefavirales	Baculoviridae	Alphabaculovirus	Buffalo	Rectum
Buffalo_10339	VC_25109	58824	Complete	uncertain_virulent	Unassigned	Unassigned	Unassigned	Unassigned	Unassigned	Buffalo	Rectum
Buffalo_1034	VC_18948	49780	Medium-quality	uncertain_temperate	Nucleocytoviricota	Megaviricetes	Imitervirales	Mimiviridae	Mimivirus	Buffalo	Colon
Buffalo_10340	VC_25110	40134	Medium-quality	uncertain_temperate	Uroviricota	Caudoviricetes	Caudovirales	Siphoviridae	Unassigned	Buffalo	Rectum
Buffalo_10341	VC_1171	7166	Complete	uncertain_virulent	Unassigned	Unassigned	Unassigned	Unassigned	Unassigned	Buffalo	Rectum
Buffalo_10342	VC_25111	44881	Medium-quality	uncertain_virulent	Unassigned	Unassigned	Unassigned	Unassigned	Unassigned	Buffalo	Rectum
Buffalo_10343	VC_2460	38195	Medium-quality	uncertain_temperate	Uroviricota	Caudoviricetes	Caudovirales	Siphoviridae	Unassigned	Buffalo	Rectum
Buffalo_10344	VC_25112	63491	Medium-quality	uncertain_virulent	Unassigned	Unassigned	Unassigned	Unassigned	Unassigned	Buffalo	Rectum
Buffalo_10345	VC_7450	5716	Complete	uncertain_temperate	Unassigned	Unassigned	Unassigned	Unassigned	Unassigned	Buffalo	Rectum
Buffalo_10347	VC_4025	5725	Complete	uncertain_virulent	Phixviricota	Malgrandaviricetes	Petitvirales	Microviridae	Unassigned	Buffalo	Rectum
Buffalo_10348	VC_25113	6882	Complete	uncertain_virulent	Phixviricota	Malgrandaviricetes	Petitvirales	Microviridae	Unassigned	Buffalo	Rectum
Buffalo_10349	VC_25114	6077	Medium-quality	virulent	Unassigned	Naldaviricetes	Lefavirales	Baculoviridae	Betabaculovirus	Buffalo	Rectum
Buffalo_1035	VC_7452	108739	Complete	uncertain_virulent	Uroviricota	Caudoviricetes	Caudovirales	Demerecviridae	Tequintavirus	Buffalo	Colon
Buffalo_10350	VC_25115	46586	Medium-quality	virulent	Uroviricota	Caudoviricetes	Caudovirales	Siphoviridae	Kenoshavirus	Buffalo	Rectum
Buffalo_10351	VC_7451	132954	Medium-quality	virulent	Unassigned	Naldaviricetes	Lefavirales	Baculoviridae	Alphabaculovirus	Buffalo	Rectum
Buffalo_10352	VC_25116	128663	High-quality	uncertain_virulent	Unassigned	Unassigned	Unassigned	Unassigned	Unassigned	Buffalo	Rectum
Buffalo_10353	VC_1171	7165	Complete	uncertain_virulent	Unassigned	Unassigned	Unassigned	Unassigned	Unassigned	Buffalo	Rectum
Buffalo_10354	VC_25117	41170	Medium-quality	uncertain_virulent	Unassigned	Unassigned	Unassigned	Unassigned	Unassigned	Buffalo	Rectum
Buffalo_10355	VC_25118	39665	Medium-quality	uncertain_virulent	Uroviricota	Caudoviricetes	Caudovirales	Schitoviridae	Pacinivirus	Buffalo	Rectum
Buffalo_10357	VC_25119	36827	Medium-quality	uncertain_temperate	Uroviricota	Caudoviricetes	Caudovirales	Siphoviridae	Saphexavirus	Buffalo	Rectum
Buffalo_10358	VC_382	18580	Medium-quality	uncertain_temperate	Uroviricota	Caudoviricetes	Caudovirales	Podoviridae	Unassigned	Buffalo	Rectum
Buffalo_10359	VC_25120	27766	Medium-quality	uncertain_virulent	Unassigned	Unassigned	Unassigned	Unassigned	Unassigned	Buffalo	Rectum
Buffalo_10360	VC_474	49405	Medium-quality	uncertain_virulent	Uroviricota	Caudoviricetes	Caudovirales	Siphoviridae	Unassigned	Buffalo	Rectum
Buffalo_10361	VC_25121	35874	Medium-quality	uncertain_virulent	Uroviricota	Caudoviricetes	Caudovirales	Rountreeviridae	Rosenblumvirus	Buffalo	Rectum
Buffalo_10362	VC_25122	5191	Medium-quality	virulent	Phixviricota	Malgrandaviricetes	Petitvirales	Microviridae	Unassigned	Buffalo	Rectum
Buffalo_10363	VC_25123	100191	Medium-quality	virulent	Nucleocytoviricota	Megaviricetes	Imitervirales	Mimiviridae	Mimivirus	Buffalo	Rectum
Buffalo_10364	VC_25124	41024	Medium-quality	uncertain_temperate	Nucleocytoviricota	Megaviricetes	Imitervirales	Mimiviridae	Mimivirus	Buffalo	Rectum
Buffalo_10365	VC_25125	38514	Medium-quality	uncertain_virulent	Unassigned	Unassigned	Unassigned	Unassigned	Unassigned	Buffalo	Rectum
Buffalo_10366	VC_25126	14034	Medium-quality	uncertain_temperate	Unassigned	Unassigned	Unassigned	Polydnaviriformidae	Bracoviriform	Buffalo	Rectum
Buffalo_10367	VC_381	48229	Medium-quality	uncertain_temperate	Nucleocytoviricota	Megaviricetes	Imitervirales	Mimiviridae	Mimivirus	Buffalo	Rectum
Buffalo_10368	VC_25127	52102	Medium-quality	uncertain_temperate	Uroviricota	Caudoviricetes	Caudovirales	Siphoviridae	Vividuovirus	Buffalo	Rectum
Buffalo_10369	VC_25128	39102	Medium-quality	uncertain_virulent	Uroviricota	Caudoviricetes	Caudovirales	Siphoviridae	Vedamuthuvirus	Buffalo	Rectum
Buffalo_1037	VC_4049	154902	Complete	virulent	Uroviricota	Caudoviricetes	Caudovirales	Ackermannviridae	Agtrevirus	Buffalo	Colon
Buffalo_10370	VC_25129	40192	Medium-quality	uncertain_temperate	Uroviricota	Caudoviricetes	Caudovirales	Myoviridae	Phikzvirus	Buffalo	Rectum
Buffalo_10371	VC_728	5878	Complete	uncertain_temperate	Phixviricota	Malgrandaviricetes	Petitvirales	Microviridae	Unassigned	Buffalo	Rectum
Buffalo_10372	VC_1677	5049	Medium-quality	uncertain_virulent	Phixviricota	Malgrandaviricetes	Petitvirales	Microviridae	Unassigned	Buffalo	Rectum
Buffalo_10373	VC_25130	36377	Medium-quality	uncertain_temperate	Unassigned	Naldaviricetes	Lefavirales	Baculoviridae	Alphabaculovirus	Buffalo	Rectum
Buffalo_10374	VC_25131	6191	Medium-quality	virulent	Nucleocytoviricota	Pokkesviricetes	Chitovirales	Poxviridae	Betaentomopoxvirus	Buffalo	Rectum
Buffalo_10375	VC_25132	35767	Medium-quality	uncertain_temperate	Peploviricota	Herviviricetes	Herpesvirales	Herpesviridae	Proboscivirus	Buffalo	Rectum
Buffalo_10376	VC_115	55280	Medium-quality	uncertain_temperate	Uroviricota	Caudoviricetes	Caudovirales	Siphoviridae	Unassigned	Buffalo	Rectum
Buffalo_10377	VC_25133	51926	Medium-quality	temperate	Nucleocytoviricota	Pokkesviricetes	Chitovirales	Poxviridae	Betaentomopoxvirus	Buffalo	Rectum
Buffalo_10378	VC_25134	39169	Medium-quality	uncertain_virulent	Unassigned	Unassigned	Unassigned	Unassigned	Unassigned	Buffalo	Rectum
Buffalo_10379	VC_25135	14708	Medium-quality	uncertain_virulent	Unassigned	Unassigned	Unassigned	Unassigned	Unassigned	Buffalo	Rectum
Buffalo_1038	VC_18949	62116	Medium-quality	uncertain_temperate	Unassigned	Naldaviricetes	Lefavirales	Baculoviridae	Alphabaculovirus	Buffalo	Colon
Buffalo_10381	VC_25136	33683	Medium-quality	uncertain_virulent	Unassigned	Unassigned	Unassigned	Unassigned	Unassigned	Buffalo	Rectum
Buffalo_10382	VC_25137	115383	Medium-quality	uncertain_virulent	Unassigned	Unassigned	Unassigned	Polydnaviriformidae	Bracoviriform	Buffalo	Rectum
Buffalo_10383	VC_25138	43485	Medium-quality	uncertain_temperate	Unassigned	Naldaviricetes	Lefavirales	Baculoviridae	Alphabaculovirus	Buffalo	Rectum
Buffalo_10384	VC_25139	53066	Medium-quality	uncertain_temperate	Nucleocytoviricota	Megaviricetes	Imitervirales	Mimiviridae	Mimivirus	Buffalo	Rectum
Buffalo_10385	VC_4023	39917	Medium-quality	uncertain_virulent	Uroviricota	Caudoviricetes	Caudovirales	Siphoviridae	Skunavirus	Buffalo	Rectum
Buffalo_10387	VC_25140	38167	Medium-quality	uncertain_virulent	Nucleocytoviricota	Megaviricetes	Imitervirales	Mimiviridae	Mimivirus	Buffalo	Rectum
Buffalo_10388	VC_7454	38360	Medium-quality	uncertain_temperate	Uroviricota	Caudoviricetes	Caudovirales	Siphoviridae	Unassigned	Buffalo	Rectum
Buffalo_1039	VC_18950	60655	Complete	uncertain_temperate	Unassigned	Unassigned	Unassigned	Unassigned	Unassigned	Buffalo	Colon
Buffalo_10390	VC_25141	44964	Medium-quality	uncertain_virulent	Uroviricota	Caudoviricetes	Caudovirales	Siphoviridae	Unassigned	Buffalo	Rectum
Buffalo_10391	VC_7455	29706	Medium-quality	uncertain_temperate	Uroviricota	Caudoviricetes	Caudovirales	Siphoviridae	Unassigned	Buffalo	Rectum
Buffalo_10392	VC_2461	50428	Medium-quality	uncertain_temperate	Uroviricota	Caudoviricetes	Caudovirales	Siphoviridae	Unassigned	Buffalo	Rectum
Buffalo_10393	VC_25142	38668	Medium-quality	uncertain_virulent	Unassigned	Unassigned	Unassigned	Unassigned	Unassigned	Buffalo	Rectum
Buffalo_10395	VC_25143	19851	Medium-quality	uncertain_virulent	Uroviricota	Caudoviricetes	Caudovirales	Guelinviridae	Brucesealvirus	Buffalo	Rectum
Buffalo_10396	VC_4031	34530	Medium-quality	uncertain_temperate	Uroviricota	Caudoviricetes	Caudovirales	Siphoviridae	Unassigned	Buffalo	Rectum
Buffalo_10397	VC_25144	22641	Medium-quality	uncertain_temperate	Unassigned	Unassigned	Unassigned	Unassigned	Unassigned	Buffalo	Rectum
Buffalo_10398	VC_25145	6215	Medium-quality	uncertain_virulent	Phixviricota	Malgrandaviricetes	Petitvirales	Microviridae	Unassigned	Buffalo	Rectum
Buffalo_10399	VC_7456	59339	Medium-quality	uncertain_temperate	Uroviricota	Caudoviricetes	Caudovirales	Siphoviridae	Kenoshavirus	Buffalo	Rectum
Buffalo_104	VC_18467	5387	High-quality	uncertain_temperate	Unassigned	Unassigned	Unassigned	Unassigned	Unassigned	Buffalo	Rectum
Buffalo_10400	VC_25146	41633	Medium-quality	uncertain_temperate	Unassigned	Unassigned	Unassigned	Unassigned	Unassigned	Buffalo	Rectum
Buffalo_10401	VC_25147	48810	Medium-quality	temperate	Nucleocytoviricota	Megaviricetes	Imitervirales	Mimiviridae	Mimivirus	Buffalo	Rectum
Buffalo_10402	VC_25148	248548	Complete	uncertain_virulent	Nucleocytoviricota	Pokkesviricetes	Chitovirales	Poxviridae	Betaentomopoxvirus	Buffalo	Rectum
Buffalo_10403	VC_25149	36309	Medium-quality	uncertain_temperate	Nucleocytoviricota	Pokkesviricetes	Chitovirales	Poxviridae	Betaentomopoxvirus	Buffalo	Rectum
Buffalo_10404	VC_1673	7182	Complete	uncertain_virulent	Uroviricota	Caudoviricetes	Caudovirales	Myoviridae	Winklervirus	Buffalo	Rectum
Buffalo_10405	VC_25150	57618	Medium-quality	uncertain_virulent	Unassigned	Unassigned	Unassigned	Unassigned	Unassigned	Buffalo	Rectum
Buffalo_10406	VC_7457	81907	Medium-quality	uncertain_temperate	Unassigned	Unassigned	Unassigned	Unassigned	Unassigned	Buffalo	Rectum
Buffalo_10407	VC_25151	34347	Medium-quality	uncertain_virulent	Unassigned	Unassigned	Unassigned	Unassigned	Unassigned	Buffalo	Rectum
Buffalo_10408	VC_7458	44595	Medium-quality	uncertain_virulent	Uroviricota	Caudoviricetes	Caudovirales	Siphoviridae	Unassigned	Buffalo	Rectum
Buffalo_10409	VC_7459	40946	Medium-quality	uncertain_temperate	Uroviricota	Caudoviricetes	Caudovirales	Siphoviridae	Fromanvirus	Buffalo	Rectum
Buffalo_1041	VC_7462	36169	Medium-quality	uncertain_virulent	Unassigned	Naldaviricetes	Lefavirales	Baculoviridae	Alphabaculovirus	Buffalo	Colon
Buffalo_10410	VC_25152	29589	Medium-quality	uncertain_temperate	Uroviricota	Caudoviricetes	Caudovirales	Siphoviridae	Phifelvirus	Buffalo	Rectum
Buffalo_10411	VC_25153	5101	Medium-quality	uncertain_temperate	Kitrinoviricota	Flasuviricetes	Amarillovirales	Flaviviridae	Pestivirus	Buffalo	Rectum
Buffalo_10412	VC_25154	62485	High-quality	virulent	Uroviricota	Caudoviricetes	Caudovirales	Siphoviridae	Kenoshavirus	Buffalo	Rectum
Buffalo_10413	VC_25155	32535	Medium-quality	uncertain_virulent	Nucleocytoviricota	Pokkesviricetes	Chitovirales	Poxviridae	Betaentomopoxvirus	Buffalo	Rectum
Buffalo_10414	VC_7460	10647	High-quality	uncertain_virulent	Unassigned	Unassigned	Unassigned	Unassigned	Unassigned	Buffalo	Rectum
Buffalo_10416	VC_1677	5101	Medium-quality	uncertain_virulent	Phixviricota	Malgrandaviricetes	Petitvirales	Microviridae	Unassigned	Buffalo	Rectum
Buffalo_10417	VC_25156	33822	Medium-quality	uncertain_virulent	Unassigned	Unassigned	Unassigned	Unassigned	Unassigned	Buffalo	Rectum
Buffalo_10418	VC_7461	40417	Medium-quality	uncertain_virulent	Unassigned	Unassigned	Unassigned	Unassigned	Unassigned	Buffalo	Rectum
Buffalo_10419	VC_25157	43225	Medium-quality	uncertain_temperate	Unassigned	Naldaviricetes	Lefavirales	Baculoviridae	Alphabaculovirus	Buffalo	Rectum
Buffalo_10420	VC_7463	36536	Medium-quality	uncertain_virulent	Unassigned	Unassigned	Unassigned	Unassigned	Unassigned	Buffalo	Rectum
Buffalo_10421	VC_25158	30592	Medium-quality	uncertain_virulent	Uroviricota	Caudoviricetes	Caudovirales	Myoviridae	Barbavirus	Buffalo	Rectum
Buffalo_10422	VC_25159	43148	Medium-quality	uncertain_temperate	Uroviricota	Caudoviricetes	Caudovirales	Siphoviridae	Unassigned	Buffalo	Rectum
Buffalo_10423	VC_25160	33799	Medium-quality	uncertain_virulent	Unassigned	Unassigned	Unassigned	Unassigned	Unassigned	Buffalo	Rectum
Buffalo_10425	VC_25161	53497	Medium-quality	uncertain_virulent	Uroviricota	Caudoviricetes	Caudovirales	Siphoviridae	Unassigned	Buffalo	Rectum
Buffalo_10426	VC_2460	36791	Medium-quality	uncertain_temperate	Uroviricota	Caudoviricetes	Caudovirales	Siphoviridae	Unassigned	Buffalo	Rectum
Buffalo_10427	VC_2462	13411	Medium-quality	uncertain_virulent	Uroviricota	Caudoviricetes	Caudovirales	Myoviridae	Pbunavirus	Buffalo	Rectum
Buffalo_10428	VC_25162	46450	Medium-quality	uncertain_virulent	Uroviricota	Caudoviricetes	Caudovirales	Siphoviridae	Unassigned	Buffalo	Rectum
Buffalo_10429	VC_25163	98378	Medium-quality	uncertain_virulent	Nucleocytoviricota	Pokkesviricetes	Chitovirales	Poxviridae	Betaentomopoxvirus	Buffalo	Rectum
Buffalo_1043	VC_7465	47499	Medium-quality	virulent	Uroviricota	Caudoviricetes	Caudovirales	Siphoviridae	Plotvirus	Buffalo	Colon
Buffalo_10431	VC_25164	28279	Medium-quality	uncertain_virulent	Nucleocytoviricota	Pokkesviricetes	Chitovirales	Poxviridae	Orthopoxvirus	Buffalo	Rectum
Buffalo_10432	VC_25165	49282	Medium-quality	uncertain_virulent	Uroviricota	Caudoviricetes	Caudovirales	Siphoviridae	Unassigned	Buffalo	Rectum
Buffalo_10433	VC_25166	43463	Medium-quality	uncertain_virulent	Uroviricota	Caudoviricetes	Caudovirales	Siphoviridae	Unassigned	Buffalo	Rectum
Buffalo_10434	VC_25167	39846	Medium-quality	uncertain_virulent	Unassigned	Unassigned	Unassigned	Unassigned	Unassigned	Buffalo	Rectum
Buffalo_10435	VC_25168	5274	Medium-quality	virulent	Phixviricota	Malgrandaviricetes	Petitvirales	Microviridae	Unassigned	Buffalo	Rectum
Buffalo_10436	VC_25169	42783	Medium-quality	uncertain_virulent	Unassigned	Unassigned	Unassigned	Unassigned	Unassigned	Buffalo	Rectum
Buffalo_10437	VC_25170	78264	Medium-quality	uncertain_temperate	Nucleocytoviricota	Pokkesviricetes	Chitovirales	Poxviridae	Betaentomopoxvirus	Buffalo	Rectum
Buffalo_10438	VC_25171	38868	Medium-quality	uncertain_temperate	Unassigned	Naldaviricetes	Lefavirales	Baculoviridae	Alphabaculovirus	Buffalo	Rectum
Buffalo_10439	VC_25172	46169	Medium-quality	uncertain_virulent	Unassigned	Unassigned	Unassigned	Unassigned	Unassigned	Buffalo	Rectum
Buffalo_1044	VC_18951	43120	Medium-quality	uncertain_temperate	Nucleocytoviricota	Megaviricetes	Imitervirales	Mimiviridae	Mimivirus	Buffalo	Colon
Buffalo_10440	VC_25173	88956	Medium-quality	uncertain_virulent	Unassigned	Naldaviricetes	Lefavirales	Baculoviridae	Alphabaculovirus	Buffalo	Rectum
Buffalo_10441	VC_25174	6321	High-quality	virulent	Phixviricota	Malgrandaviricetes	Petitvirales	Microviridae	Unassigned	Buffalo	Rectum
Buffalo_10442	VC_25175	28905	Medium-quality	uncertain_temperate	Unassigned	Unassigned	Unassigned	Unassigned	Unassigned	Buffalo	Rectum
Buffalo_10443	VC_25176	45247	Medium-quality	uncertain_virulent	Uroviricota	Caudoviricetes	Caudovirales	Myoviridae	Tequatrovirus	Buffalo	Rectum
Buffalo_10444	VC_4050	5368	Complete	uncertain_temperate	Phixviricota	Malgrandaviricetes	Petitvirales	Microviridae	Unassigned	Buffalo	Rectum
Buffalo_10445	VC_25177	24207	Medium-quality	uncertain_temperate	Unassigned	Unassigned	Unassigned	Unassigned	Unassigned	Buffalo	Rectum
Buffalo_10446	VC_2465	42934	Medium-quality	uncertain_temperate	Uroviricota	Caudoviricetes	Caudovirales	Myoviridae	Unassigned	Buffalo	Rectum
Buffalo_10447	VC_25178	31286	Medium-quality	uncertain_temperate	Uroviricota	Caudoviricetes	Caudovirales	Schitoviridae	Gamaleyavirus	Buffalo	Rectum
Buffalo_10448	VC_7467	25840	Medium-quality	uncertain_virulent	Uroviricota	Caudoviricetes	Caudovirales	Siphoviridae	Unassigned	Buffalo	Rectum
Buffalo_1045	VC_18952	32281	Medium-quality	uncertain_virulent	Unassigned	Unassigned	Unassigned	Unassigned	Unassigned	Buffalo	Colon
Buffalo_10451	VC_25180	108327	Medium-quality	uncertain_virulent	Uroviricota	Caudoviricetes	Caudovirales	Herelleviridae	Schiekvirus	Buffalo	Rectum
Buffalo_10452	VC_25181	38224	Medium-quality	uncertain_temperate	Unassigned	Unassigned	Unassigned	Unassigned	Unassigned	Buffalo	Rectum
Buffalo_10453	VC_25182	32468	Medium-quality	uncertain_temperate	Unassigned	Naldaviricetes	Lefavirales	Baculoviridae	Alphabaculovirus	Buffalo	Rectum
Buffalo_10454	VC_25183	35656	Medium-quality	uncertain_temperate	Uroviricota	Caudoviricetes	Caudovirales	Siphoviridae	Unassigned	Buffalo	Rectum
Buffalo_10455	VC_25184	6677	High-quality	virulent	Phixviricota	Malgrandaviricetes	Petitvirales	Microviridae	Unassigned	Buffalo	Rectum
Buffalo_10456	VC_25185	36173	Medium-quality	uncertain_temperate	Uroviricota	Caudoviricetes	Caudovirales	Rountreeviridae	Rosenblumvirus	Buffalo	Rectum
Buffalo_10457	VC_25186	30199	Medium-quality	uncertain_temperate	Uroviricota	Caudoviricetes	Caudovirales	Myoviridae	Jiaodavirus	Buffalo	Rectum
Buffalo_10458	VC_25187	67727	Medium-quality	uncertain_virulent	Unassigned	Unassigned	Unassigned	Unassigned	Unassigned	Buffalo	Rectum
Buffalo_10459	VC_25188	6343	High-quality	uncertain_virulent	Uroviricota	Caudoviricetes	Caudovirales	Schitoviridae	Gamaleyavirus	Buffalo	Rectum
Buffalo_1046	VC_18953	38720	Medium-quality	uncertain_virulent	Peploviricota	Herviviricetes	Herpesvirales	Herpesviridae	Macavirus	Buffalo	Colon
Buffalo_10460	VC_25189	17409	Medium-quality	uncertain_temperate	Uroviricota	Caudoviricetes	Caudovirales	Herelleviridae	Wphvirus	Buffalo	Rectum
Buffalo_10461	VC_25190	6516	High-quality	virulent	Unassigned	Unassigned	Unassigned	Unassigned	Unassigned	Buffalo	Rectum
Buffalo_10462	VC_381	49071	Medium-quality	uncertain_virulent	Unassigned	Unassigned	Unassigned	Unassigned	Unassigned	Buffalo	Rectum
Buffalo_10463	VC_25191	115805	Medium-quality	uncertain_virulent	Uroviricota	Caudoviricetes	Caudovirales	Siphoviridae	Wizardvirus	Buffalo	Rectum
Buffalo_10464	VC_25192	6149	High-quality	virulent	Nucleocytoviricota	Megaviricetes	Imitervirales	Mimiviridae	Mimivirus	Buffalo	Rectum
Buffalo_10465	VC_25193	50124	Medium-quality	uncertain_virulent	Uroviricota	Caudoviricetes	Caudovirales	Siphoviridae	Jerseyvirus	Buffalo	Rectum
Buffalo_10466	VC_2455	18427	Medium-quality	uncertain_virulent	Unassigned	Unassigned	Unassigned	Unassigned	Unassigned	Buffalo	Rectum
Buffalo_10467	VC_2460	32113	Medium-quality	uncertain_temperate	Uroviricota	Caudoviricetes	Caudovirales	Siphoviridae	Unassigned	Buffalo	Rectum
Buffalo_10468	VC_25194	15653	Medium-quality	uncertain_virulent	Uroviricota	Caudoviricetes	Caudovirales	Podoviridae	Unassigned	Buffalo	Rectum
Buffalo_10469	VC_25195	73369	High-quality	uncertain_virulent	Unassigned	Unassigned	Unassigned	Unassigned	Unassigned	Buffalo	Rectum
Buffalo_1047	VC_1172	30556	Medium-quality	virulent	Unassigned	Unassigned	Unassigned	Unassigned	Unassigned	Buffalo	Colon
Buffalo_10470	VC_25196	16062	Medium-quality	uncertain_virulent	Uroviricota	Caudoviricetes	Caudovirales	Podoviridae	Unassigned	Buffalo	Rectum
Buffalo_10471	VC_25197	6410	High-quality	uncertain_virulent	Phixviricota	Malgrandaviricetes	Petitvirales	Microviridae	Unassigned	Buffalo	Rectum
Buffalo_10472	VC_25198	4896	Medium-quality	uncertain_virulent	Unassigned	Unassigned	Unassigned	Polydnaviriformidae	Bracoviriform	Buffalo	Rectum
Buffalo_10473	VC_7468	13059	Medium-quality	uncertain_virulent	Nucleocytoviricota	Megaviricetes	Imitervirales	Mimiviridae	Mimivirus	Buffalo	Rectum
Buffalo_10474	VC_25199	17419	Medium-quality	uncertain_temperate	Unassigned	Naldaviricetes	Lefavirales	Baculoviridae	Betabaculovirus	Buffalo	Rectum
Buffalo_10475	VC_25200	36528	Medium-quality	uncertain_virulent	Unassigned	Unassigned	Unassigned	Unassigned	Unassigned	Buffalo	Rectum
Buffalo_10476	VC_1679	31265	Medium-quality	uncertain_temperate	Unassigned	Unassigned	Unassigned	Unassigned	Unassigned	Buffalo	Rectum
Buffalo_10477	VC_25201	28935	Medium-quality	uncertain_virulent	Uroviricota	Caudoviricetes	Unassigned	Casjensviridae	Chivirus	Buffalo	Rectum
Buffalo_10478	VC_25202	10244	Medium-quality	virulent	Peploviricota	Herviviricetes	Herpesvirales	Herpesviridae	Unassigned	Buffalo	Rectum
Buffalo_10479	VC_1170	45701	Medium-quality	uncertain_virulent	Unassigned	Unassigned	Unassigned	Unassigned	Unassigned	Buffalo	Rectum
Buffalo_1048	VC_7469	52403	Medium-quality	uncertain_virulent	Unassigned	Unassigned	Unassigned	Unassigned	Unassigned	Buffalo	Colon
Buffalo_10480	VC_25203	44856	Medium-quality	uncertain_temperate	Unassigned	Unassigned	Unassigned	Unassigned	Unassigned	Buffalo	Rectum
Buffalo_10481	VC_25204	14850	Complete	uncertain_virulent	Nucleocytoviricota	Pokkesviricetes	Chitovirales	Poxviridae	Betaentomopoxvirus	Buffalo	Rectum
Buffalo_10482	VC_25205	7122	Complete	uncertain_virulent	Unassigned	Unassigned	Unassigned	Unassigned	Unassigned	Buffalo	Rectum
Buffalo_10483	VC_25206	52329	Medium-quality	uncertain_temperate	Uroviricota	Caudoviricetes	Caudovirales	Autographiviridae	Berlinvirus	Buffalo	Rectum
Buffalo_10484	VC_25207	69792	Medium-quality	uncertain_temperate	Uroviricota	Caudoviricetes	Caudovirales	Siphoviridae	Audreyjarvisvirus	Buffalo	Rectum
Buffalo_10486	VC_25208	13922	Complete	uncertain_virulent	Nucleocytoviricota	Megaviricetes	Imitervirales	Mimiviridae	Mimivirus	Buffalo	Rectum
Buffalo_10487	VC_25209	6494	Complete	uncertain_virulent	Phixviricota	Malgrandaviricetes	Petitvirales	Microviridae	Unassigned	Buffalo	Rectum
Buffalo_10489	VC_25210	6409	High-quality	uncertain_virulent	Unassigned	Unassigned	Unassigned	Unassigned	Unassigned	Buffalo	Rectum
Buffalo_1049	VC_1174	7366	Complete	uncertain_virulent	Unassigned	Unassigned	Unassigned	Unassigned	Unassigned	Buffalo	Colon,Omasum,Reticulum
Buffalo_10490	VC_25211	14306	Medium-quality	uncertain_virulent	Unassigned	Unassigned	Unassigned	Unassigned	Unassigned	Buffalo	Rectum
Buffalo_10491	VC_25212	42149	Medium-quality	uncertain_temperate	Uroviricota	Caudoviricetes	Caudovirales	Myoviridae	Barbavirus	Buffalo	Rectum
Buffalo_10492	VC_25213	15834	Medium-quality	uncertain_virulent	Unassigned	Naldaviricetes	Lefavirales	Baculoviridae	Alphabaculovirus	Buffalo	Rectum
Buffalo_10493	VC_25214	38789	Medium-quality	virulent	Uroviricota	Caudoviricetes	Caudovirales	Myoviridae	Acionnavirus	Buffalo	Rectum
Buffalo_10494	VC_725	40551	Medium-quality	temperate	Nucleocytoviricota	Megaviricetes	Imitervirales	Mimiviridae	Mimivirus	Buffalo	Rectum
Buffalo_10495	VC_25215	53777	Medium-quality	uncertain_temperate	Uroviricota	Caudoviricetes	Caudovirales	Herelleviridae	Wphvirus	Buffalo	Rectum
Buffalo_10496	VC_25216	48943	Medium-quality	uncertain_temperate	Uroviricota	Caudoviricetes	Caudovirales	Myoviridae	Phikzvirus	Buffalo	Rectum
Buffalo_10497	VC_25217	114148	Medium-quality	uncertain_virulent	Nucleocytoviricota	Pokkesviricetes	Chitovirales	Poxviridae	Betaentomopoxvirus	Buffalo	Rectum
Buffalo_10498	VC_7470	6553	High-quality	uncertain_virulent	Unassigned	Unassigned	Unassigned	Unassigned	Unassigned	Buffalo	Rectum
Buffalo_10499	VC_25218	53631	Medium-quality	uncertain_temperate	Uroviricota	Caudoviricetes	Caudovirales	Siphoviridae	Ceduovirus	Buffalo	Rectum
Buffalo_105	VC_18468	5166	High-quality	uncertain_virulent	Unassigned	Unassigned	Unassigned	Unassigned	Unassigned	Buffalo	Rectum
Buffalo_1050	VC_18954	39840	Medium-quality	uncertain_temperate	Nucleocytoviricota	Megaviricetes	Imitervirales	Mimiviridae	Mimivirus	Buffalo	Colon
Buffalo_10500	VC_7439	5338	Medium-quality	virulent	Nucleocytoviricota	Megaviricetes	Imitervirales	Mimiviridae	Mimivirus	Buffalo	Rectum
Buffalo_10501	VC_25219	34564	Medium-quality	uncertain_temperate	Uroviricota	Caudoviricetes	Caudovirales	Siphoviridae	Unassigned	Buffalo	Rectum
Buffalo_10502	VC_25220	20181	Medium-quality	uncertain_virulent	Uroviricota	Caudoviricetes	Caudovirales	Podoviridae	Lederbergvirus	Buffalo	Rectum
Buffalo_10503	VC_2466	38249	Medium-quality	virulent	Unassigned	Unassigned	Unassigned	Unassigned	Unassigned	Buffalo	Rectum
Buffalo_10504	VC_4051	18072	Medium-quality	uncertain_temperate	Unassigned	Naldaviricetes	Lefavirales	Baculoviridae	Alphabaculovirus	Buffalo	Rectum
Buffalo_10505	VC_25221	6254	Complete	uncertain_virulent	Phixviricota	Malgrandaviricetes	Petitvirales	Microviridae	Unassigned	Buffalo	Rectum
Buffalo_10506	VC_7471	25048	Medium-quality	virulent	Unassigned	Unassigned	Unassigned	Unassigned	Unassigned	Buffalo	Rectum
Buffalo_10507	VC_25222	161443	Complete	uncertain_virulent	Nucleocytoviricota	Megaviricetes	Imitervirales	Mimiviridae	Mimivirus	Buffalo	Rectum
Buffalo_10508	VC_25223	6047	Medium-quality	temperate	Unassigned	Unassigned	Unassigned	Unassigned	Unassigned	Buffalo	Rectum
Buffalo_10509	VC_2467	6180	Medium-quality	uncertain_virulent	Phixviricota	Malgrandaviricetes	Petitvirales	Microviridae	Unassigned	Buffalo	Rectum
Buffalo_1051	VC_18955	69018	Complete	uncertain_virulent	Unassigned	Unassigned	Unassigned	Unassigned	Unassigned	Buffalo	Colon
Buffalo_10510	VC_7472	6243	High-quality	uncertain_virulent	Unassigned	Unassigned	Unassigned	Unassigned	Unassigned	Buffalo	Rectum
Buffalo_10511	VC_25224	133486	Medium-quality	uncertain_virulent	Nucleocytoviricota	Pokkesviricetes	Chitovirales	Poxviridae	Betaentomopoxvirus	Buffalo	Rectum
Buffalo_10513	VC_1170	46317	Medium-quality	uncertain_virulent	Unassigned	Unassigned	Unassigned	Unassigned	Unassigned	Buffalo	Rectum
Buffalo_10514	VC_317	6012	Complete	uncertain_virulent	Unassigned	Unassigned	Unassigned	Unassigned	Unassigned	Buffalo	Rectum
Buffalo_10515	VC_4036	6418	High-quality	uncertain_virulent	Phixviricota	Malgrandaviricetes	Petitvirales	Microviridae	Unassigned	Buffalo	Rectum
Buffalo_10516	VC_25225	6336	High-quality	uncertain_virulent	Phixviricota	Malgrandaviricetes	Petitvirales	Microviridae	Unassigned	Buffalo	Rectum
Buffalo_10518	VC_25226	42691	Medium-quality	uncertain_temperate	Uroviricota	Caudoviricetes	Caudovirales	Siphoviridae	Vedamuthuvirus	Buffalo	Rectum
Buffalo_10519	VC_25227	4993	Medium-quality	uncertain_virulent	Phixviricota	Malgrandaviricetes	Petitvirales	Microviridae	Unassigned	Buffalo	Rectum
Buffalo_1052	VC_18956	33546	Medium-quality	uncertain_temperate	Cressdnaviricota	Repensiviricetes	Geplafuvirales	Geminiviridae	Begomovirus	Buffalo	Colon
Buffalo_10520	VC_25228	12391	Medium-quality	uncertain_virulent	Unassigned	Unassigned	Unassigned	Unassigned	Unassigned	Buffalo	Rectum
Buffalo_10521	VC_25229	40564	Medium-quality	uncertain_virulent	Uroviricota	Caudoviricetes	Caudovirales	Siphoviridae	Fromanvirus	Buffalo	Rectum
Buffalo_10522	VC_25230	4956	High-quality	uncertain_temperate	Nucleocytoviricota	Pokkesviricetes	Chitovirales	Poxviridae	Betaentomopoxvirus	Buffalo	Rectum
Buffalo_10523	VC_25231	29946	Medium-quality	uncertain_temperate	Uroviricota	Caudoviricetes	Caudovirales	Siphoviridae	Unassigned	Buffalo	Rectum
Buffalo_10524	VC_25232	53272	Medium-quality	uncertain_virulent	Unassigned	Unassigned	Unassigned	Unassigned	Unassigned	Buffalo	Rectum
Buffalo_10525	VC_4052	50420	Medium-quality	uncertain_virulent	Unassigned	Unassigned	Unassigned	Unassigned	Unassigned	Buffalo	Rectum
Buffalo_10526	VC_25233	5552	Complete	uncertain_temperate	Phixviricota	Malgrandaviricetes	Petitvirales	Microviridae	Unassigned	Buffalo	Rectum
Buffalo_10527	VC_25234	167547	Medium-quality	uncertain_virulent	Unassigned	Naldaviricetes	Lefavirales	Baculoviridae	Alphabaculovirus	Buffalo	Rectum
Buffalo_10528	VC_25235	5102	Medium-quality	uncertain_temperate	Unassigned	Unassigned	Unassigned	Unassigned	Unassigned	Buffalo	Rectum
Buffalo_10529	VC_190	39893	Medium-quality	uncertain_temperate	Nucleocytoviricota	Megaviricetes	Imitervirales	Mimiviridae	Mimivirus	Buffalo	Rectum
Buffalo_1053	VC_18957	58149	Medium-quality	uncertain_temperate	Unassigned	Naldaviricetes	Lefavirales	Baculoviridae	Betabaculovirus	Buffalo	Colon
Buffalo_10530	VC_25236	16366	Medium-quality	uncertain_virulent	Nucleocytoviricota	Pokkesviricetes	Chitovirales	Poxviridae	Betaentomopoxvirus	Buffalo	Rectum
Buffalo_10531	VC_25237	5593	Medium-quality	virulent	Phixviricota	Malgrandaviricetes	Petitvirales	Microviridae	Unassigned	Buffalo	Rectum
Buffalo_10532	VC_25238	36487	Medium-quality	uncertain_temperate	Uroviricota	Caudoviricetes	Caudovirales	Siphoviridae	Samwavirus	Buffalo	Rectum
Buffalo_10533	VC_2459	44685	Medium-quality	uncertain_virulent	Uroviricota	Caudoviricetes	Caudovirales	Siphoviridae	Fromanvirus	Buffalo	Rectum
Buffalo_10534	VC_25239	33795	Medium-quality	uncertain_virulent	Unassigned	Unassigned	Unassigned	Unassigned	Unassigned	Buffalo	Rectum
Buffalo_10535	VC_2452	58667	Medium-quality	uncertain_temperate	Preplasmiviricota	Tectiliviricetes	Rowavirales	Adenoviridae	Atadenovirus	Buffalo	Rectum
Buffalo_10536	VC_25240	33205	Medium-quality	uncertain_virulent	Uroviricota	Caudoviricetes	Caudovirales	Siphoviridae	Unassigned	Buffalo	Rectum
Buffalo_10537	VC_25241	6886	Complete	uncertain_virulent	Unassigned	Unassigned	Unassigned	Unassigned	Unassigned	Buffalo	Rectum
Buffalo_10539	VC_1171	7164	Complete	uncertain_virulent	Unassigned	Unassigned	Unassigned	Unassigned	Unassigned	Buffalo	Rectum
Buffalo_1054	VC_18958	43654	Medium-quality	uncertain_temperate	Uroviricota	Caudoviricetes	Caudovirales	Siphoviridae	Fromanvirus	Buffalo	Colon
Buffalo_10540	VC_25242	15355	Medium-quality	virulent	Uroviricota	Caudoviricetes	Caudovirales	Myoviridae	Phikzvirus	Buffalo	Rectum
Buffalo_10541	VC_25243	34390	Medium-quality	uncertain_temperate	Uroviricota	Caudoviricetes	Caudovirales	Myoviridae	Unassigned	Buffalo	Rectum
Buffalo_10544	VC_317	6012	Complete	uncertain_virulent	Unassigned	Unassigned	Unassigned	Unassigned	Unassigned	Buffalo	Rectum
Buffalo_10545	VC_4053	42783	Complete	uncertain_virulent	Unassigned	Unassigned	Unassigned	Unassigned	Unassigned	Buffalo	Rectum
Buffalo_10546	VC_25244	40077	Medium-quality	virulent	Uroviricota	Caudoviricetes	Caudovirales	Myoviridae	Certrevirus	Buffalo	Rectum
Buffalo_10547	VC_4054	32576	Medium-quality	uncertain_temperate	Unassigned	Unassigned	Unassigned	Unassigned	Unassigned	Buffalo	Rectum
Buffalo_10548	VC_25245	180891	High-quality	uncertain_virulent	Nucleocytoviricota	Pokkesviricetes	Chitovirales	Poxviridae	Betaentomopoxvirus	Buffalo	Rectum
Buffalo_10549	VC_25246	37528	Medium-quality	uncertain_temperate	Uroviricota	Caudoviricetes	Caudovirales	Myoviridae	Barbavirus	Buffalo	Rectum
Buffalo_1055	VC_18959	88925	Medium-quality	uncertain_virulent	Uroviricota	Caudoviricetes	Caudovirales	Herelleviridae	Harbinvirus	Buffalo	Colon
Buffalo_10550	VC_25247	35071	Medium-quality	uncertain_virulent	Unassigned	Naldaviricetes	Lefavirales	Baculoviridae	Alphabaculovirus	Buffalo	Rectum
Buffalo_10552	VC_7475	41597	Medium-quality	uncertain_virulent	Uroviricota	Caudoviricetes	Caudovirales	Siphoviridae	Unassigned	Buffalo	Rectum
Buffalo_10553	VC_7476	32546	Medium-quality	temperate	Uroviricota	Caudoviricetes	Caudovirales	Herelleviridae	Wphvirus	Buffalo	Rectum
Buffalo_10554	VC_25248	39674	Medium-quality	uncertain_virulent	Peploviricota	Herviviricetes	Herpesvirales	Alloherpesviridae	Cyprinivirus	Buffalo	Rectum
Buffalo_10555	VC_25249	26679	Medium-quality	uncertain_temperate	Uroviricota	Caudoviricetes	Unassigned	Casjensviridae	Chivirus	Buffalo	Rectum
Buffalo_10556	VC_25250	30514	Medium-quality	uncertain_virulent	Uroviricota	Caudoviricetes	Caudovirales	Myoviridae	Sherbrookevirus	Buffalo	Rectum
Buffalo_10559	VC_7477	124646	Medium-quality	uncertain_temperate	Unassigned	Naldaviricetes	Lefavirales	Baculoviridae	Alphabaculovirus	Buffalo	Rectum
Buffalo_10560	VC_7478	157926	Medium-quality	virulent	Uroviricota	Caudoviricetes	Caudovirales	Siphoviridae	Bronvirus	Buffalo	Rectum
Buffalo_10561	VC_25252	22905	Medium-quality	uncertain_temperate	Uroviricota	Caudoviricetes	Caudovirales	Siphoviridae	Unassigned	Buffalo	Rectum
Buffalo_10564	VC_25253	48508	High-quality	uncertain_virulent	Unassigned	Unassigned	Unassigned	Unassigned	Unassigned	Buffalo	Rectum
Buffalo_10565	VC_25254	28778	Medium-quality	uncertain_temperate	Unassigned	Unassigned	Unassigned	Unassigned	Unassigned	Buffalo	Rectum
Buffalo_10566	VC_25255	88542	Medium-quality	uncertain_virulent	Uroviricota	Caudoviricetes	Caudovirales	Myoviridae	Fletchervirus	Buffalo	Rectum
Buffalo_10567	VC_7479	20576	Medium-quality	uncertain_virulent	Uroviricota	Caudoviricetes	Caudovirales	Guelinviridae	Brucesealvirus	Buffalo	Rectum
Buffalo_10569	VC_7481	6702	Complete	uncertain_virulent	Phixviricota	Malgrandaviricetes	Petitvirales	Microviridae	Unassigned	Buffalo	Rectum
Buffalo_1057	VC_4057	6542	Complete	uncertain_virulent	Uroviricota	Caudoviricetes	Caudovirales	Herelleviridae	Harbinvirus	Buffalo	Colon,Abomasum
Buffalo_10570	VC_1175	119167	Medium-quality	uncertain_virulent	Unassigned	Naldaviricetes	Lefavirales	Baculoviridae	Betabaculovirus	Buffalo	Rectum
Buffalo_10571	VC_25256	52934	Medium-quality	uncertain_temperate	Uroviricota	Caudoviricetes	Caudovirales	Siphoviridae	Unassigned	Buffalo	Rectum
Buffalo_10572	VC_4026	14939	Medium-quality	uncertain_virulent	Unassigned	Unassigned	Unassigned	Unassigned	Unassigned	Buffalo	Rectum
Buffalo_10573	VC_25257	24044	Medium-quality	uncertain_virulent	Unassigned	Unassigned	Unassigned	Unassigned	Unassigned	Buffalo	Rectum
Buffalo_10576	VC_7484	36966	Medium-quality	temperate	Uroviricota	Caudoviricetes	Caudovirales	Siphoviridae	Fromanvirus	Buffalo	Rectum
Buffalo_10577	VC_575	41689	Medium-quality	uncertain_virulent	Uroviricota	Caudoviricetes	Caudovirales	Siphoviridae	Bronvirus	Buffalo	Rectum
Buffalo_10578	VC_25258	68592	Medium-quality	uncertain_temperate	Unassigned	Naldaviricetes	Lefavirales	Baculoviridae	Alphabaculovirus	Buffalo	Rectum
Buffalo_10579	VC_25259	7001	Medium-quality	uncertain_virulent	Uroviricota	Caudoviricetes	Caudovirales	Siphoviridae	Unassigned	Buffalo	Rectum
Buffalo_1058	VC_18960	16392	Medium-quality	uncertain_virulent	Uroviricota	Caudoviricetes	Caudovirales	Podoviridae	Unassigned	Buffalo	Colon
Buffalo_10580	VC_25260	45800	Medium-quality	uncertain_virulent	Unassigned	Unassigned	Unassigned	Unassigned	Unassigned	Buffalo	Rectum
Buffalo_10581	VC_25261	32745	Medium-quality	uncertain_temperate	Unassigned	Unassigned	Unassigned	Unassigned	Unassigned	Buffalo	Rectum
Buffalo_10582	VC_25262	12502	Medium-quality	uncertain_temperate	Uroviricota	Caudoviricetes	Caudovirales	Myoviridae	Gelderlandvirus	Buffalo	Rectum
Buffalo_10583	VC_7485	36375	Medium-quality	uncertain_temperate	Uroviricota	Caudoviricetes	Caudovirales	Siphoviridae	Unassigned	Buffalo	Rectum
Buffalo_10584	VC_4058	36693	Medium-quality	uncertain_virulent	Uroviricota	Caudoviricetes	Caudovirales	Myoviridae	Lazarusvirus	Buffalo	Rectum
Buffalo_10588	VC_4052	49486	Medium-quality	uncertain_virulent	Unassigned	Unassigned	Unassigned	Unassigned	Unassigned	Buffalo	Rectum
Buffalo_10589	VC_4022	42424	Medium-quality	uncertain_virulent	Uroviricota	Caudoviricetes	Caudovirales	Siphoviridae	Unassigned	Buffalo	Rectum
Buffalo_1059	VC_18961	37422	Medium-quality	uncertain_virulent	Uroviricota	Caudoviricetes	Caudovirales	Siphoviridae	Unassigned	Buffalo	Colon
Buffalo_10591	VC_25265	43581	Medium-quality	uncertain_virulent	Uroviricota	Caudoviricetes	Caudovirales	Siphoviridae	Unassigned	Buffalo	Rectum
Buffalo_10592	VC_7487	32345	Medium-quality	uncertain_virulent	Nucleocytoviricota	Megaviricetes	Imitervirales	Mimiviridae	Mimivirus	Buffalo	Rectum
Buffalo_10593	VC_4047	16991	Medium-quality	uncertain_virulent	Uroviricota	Caudoviricetes	Caudovirales	Podoviridae	Unassigned	Buffalo	Rectum
Buffalo_10594	VC_7488	58131	Medium-quality	uncertain_virulent	Uroviricota	Caudoviricetes	Caudovirales	Siphoviridae	Karimacvirus	Buffalo	Rectum
Buffalo_10596	VC_25266	44570	Medium-quality	uncertain_temperate	Uroviricota	Caudoviricetes	Caudovirales	Siphoviridae	Unassigned	Buffalo	Rectum
Buffalo_10597	VC_7489	40491	Medium-quality	uncertain_virulent	Nucleocytoviricota	Megaviricetes	Imitervirales	Mimiviridae	Mimivirus	Buffalo	Rectum
Buffalo_10599	VC_2468	52522	Medium-quality	uncertain_virulent	Uroviricota	Caudoviricetes	Caudovirales	Siphoviridae	Unassigned	Buffalo	Rectum
Buffalo_106	VC_18469	38104	Medium-quality	uncertain_temperate	Uroviricota	Caudoviricetes	Caudovirales	Siphoviridae	Unassigned	Buffalo	Rectum
Buffalo_1060	VC_7496	64671	Complete	uncertain_virulent	Unassigned	Unassigned	Unassigned	Unassigned	Unassigned	Buffalo	Colon,Omasum
Buffalo_10600	VC_25267	33946	Medium-quality	uncertain_virulent	Uroviricota	Caudoviricetes	Caudovirales	Myoviridae	Dhakavirus	Buffalo	Rectum
Buffalo_10601	VC_2465	41830	Medium-quality	uncertain_temperate	Unassigned	Unassigned	Unassigned	Unassigned	Unassigned	Buffalo	Rectum
Buffalo_10602	VC_7490	35958	Medium-quality	uncertain_temperate	Nucleocytoviricota	Megaviricetes	Imitervirales	Mimiviridae	Mimivirus	Buffalo	Rectum
Buffalo_10603	VC_7491	51803	Medium-quality	uncertain_virulent	Uroviricota	Caudoviricetes	Caudovirales	Siphoviridae	Samistivirus	Buffalo	Rectum
Buffalo_10604	VC_7492	53772	Medium-quality	uncertain_virulent	Unassigned	Unassigned	Unassigned	Unassigned	Unassigned	Buffalo	Rectum
Buffalo_10605	VC_7493	104179	Medium-quality	uncertain_virulent	Uroviricota	Caudoviricetes	Caudovirales	Siphoviridae	Unassigned	Buffalo	Rectum
Buffalo_10606	VC_7494	51253	Medium-quality	uncertain_virulent	Uroviricota	Caudoviricetes	Caudovirales	Siphoviridae	Unassigned	Buffalo	Rectum
Buffalo_10607	VC_4060	6362	Complete	uncertain_virulent	Phixviricota	Malgrandaviricetes	Petitvirales	Microviridae	Unassigned	Buffalo	Rectum
Buffalo_10608	VC_7495	42911	Medium-quality	uncertain_temperate	Uroviricota	Caudoviricetes	Caudovirales	Siphoviridae	Unassigned	Buffalo	Rectum
Buffalo_10609	VC_4061	6531	Complete	uncertain_virulent	Unassigned	Unassigned	Unassigned	Unassigned	Unassigned	Buffalo	Rectum
Buffalo_1061	VC_1682	42591	Medium-quality	uncertain_virulent	Unassigned	Unassigned	Unassigned	Unassigned	Unassigned	Buffalo	Colon,Reticulum
Buffalo_10610	VC_7497	32154	Medium-quality	uncertain_temperate	Uroviricota	Caudoviricetes	Caudovirales	Siphoviridae	Unaquatrovirus	Buffalo	Rectum
Buffalo_10613	VC_25268	27612	Medium-quality	uncertain_temperate	Uroviricota	Caudoviricetes	Caudovirales	Siphoviridae	Unassigned	Buffalo	Rectum
Buffalo_10614	VC_4062	35895	Medium-quality	uncertain_virulent	Unassigned	Unassigned	Unassigned	Unassigned	Unassigned	Buffalo	Rectum
Buffalo_10615	VC_7499	32371	Medium-quality	uncertain_virulent	Nucleocytoviricota	Megaviricetes	Imitervirales	Mimiviridae	Mimivirus	Buffalo	Rectum
Buffalo_10616	VC_25269	100338	Medium-quality	uncertain_virulent	Nucleocytoviricota	Pokkesviricetes	Chitovirales	Poxviridae	Betaentomopoxvirus	Buffalo	Rectum
Buffalo_10617	VC_25270	43241	Medium-quality	uncertain_virulent	Unassigned	Unassigned	Unassigned	Unassigned	Unassigned	Buffalo	Rectum
Buffalo_10619	VC_7500	39408	Medium-quality	uncertain_temperate	Uroviricota	Caudoviricetes	Caudovirales	Myoviridae	Phikzvirus	Buffalo	Rectum
Buffalo_1062	VC_18962	27089	Medium-quality	uncertain_virulent	Unassigned	Unassigned	Unassigned	Unassigned	Unassigned	Buffalo	Colon
Buffalo_10620	VC_25271	184901	High-quality	uncertain_virulent	Nucleocytoviricota	Megaviricetes	Imitervirales	Mimiviridae	Mimivirus	Buffalo	Rectum
Buffalo_10622	VC_2469	187391	High-quality	uncertain_virulent	Nucleocytoviricota	Megaviricetes	Imitervirales	Mimiviridae	Mimivirus	Buffalo	Rectum
Buffalo_10623	VC_2470	54028	Medium-quality	uncertain_virulent	Unassigned	Unassigned	Unassigned	Unassigned	Unassigned	Buffalo	Rectum
Buffalo_10624	VC_4063	35047	Medium-quality	uncertain_temperate	Uroviricota	Caudoviricetes	Caudovirales	Siphoviridae	Phifelvirus	Buffalo	Rectum
Buffalo_10625	VC_25272	44806	Medium-quality	uncertain_virulent	Unassigned	Unassigned	Unassigned	Unassigned	Unassigned	Buffalo	Rectum
Buffalo_10626	VC_25273	44687	Medium-quality	uncertain_virulent	Uroviricota	Caudoviricetes	Caudovirales	Ackermannviridae	Kuttervirus	Buffalo	Rectum
Buffalo_10629	VC_25274	97777	Medium-quality	uncertain_virulent	Uroviricota	Caudoviricetes	Caudovirales	Myoviridae	Phapecoctavirus	Buffalo	Rectum
Buffalo_10630	VC_4064	43047	Medium-quality	uncertain_virulent	Unassigned	Unassigned	Unassigned	Unassigned	Unassigned	Buffalo	Rectum
Buffalo_10632	VC_25275	52218	Medium-quality	uncertain_virulent	Nucleocytoviricota	Megaviricetes	Imitervirales	Mimiviridae	Mimivirus	Buffalo	Rectum
Buffalo_10633	VC_7504	43612	Medium-quality	uncertain_virulent	Uroviricota	Caudoviricetes	Caudovirales	Myoviridae	Unassigned	Buffalo	Rectum
Buffalo_10635	VC_7505	36043	Medium-quality	uncertain_virulent	Unassigned	Unassigned	Unassigned	Unassigned	Unassigned	Buffalo	Rectum
Buffalo_10636	VC_7506	29988	Medium-quality	uncertain_virulent	Uroviricota	Caudoviricetes	Caudovirales	Siphoviridae	Unassigned	Buffalo	Rectum
Buffalo_10637	VC_7507	6265	High-quality	uncertain_virulent	Artverviricota	Revtraviricetes	Ortervirales	Caulimoviridae	Badnavirus	Buffalo	Rectum
Buffalo_10638	VC_7508	36631	Medium-quality	uncertain_temperate	Unassigned	Unassigned	Unassigned	Unassigned	Unassigned	Buffalo	Rectum
Buffalo_10639	VC_7509	35365	Medium-quality	uncertain_temperate	Unassigned	Unassigned	Unassigned	Unassigned	Unassigned	Buffalo	Rectum
Buffalo_1064	VC_18963	57466	Medium-quality	uncertain_virulent	Unassigned	Unassigned	Unassigned	Unassigned	Unassigned	Buffalo	Colon
Buffalo_10640	VC_4065	56691	Medium-quality	uncertain_virulent	Uroviricota	Caudoviricetes	Caudovirales	Siphoviridae	Omegavirus	Buffalo	Rectum
Buffalo_10643	VC_4066	40909	Medium-quality	uncertain_virulent	Uroviricota	Caudoviricetes	Caudovirales	Myoviridae	Yongloolinvirus	Buffalo	Rectum
Buffalo_10644	VC_7512	18497	Medium-quality	uncertain_virulent	Uroviricota	Caudoviricetes	Caudovirales	Podoviridae	Unassigned	Buffalo	Rectum
Buffalo_10645	VC_2461	61500	High-quality	uncertain_temperate	Uroviricota	Caudoviricetes	Caudovirales	Siphoviridae	Unassigned	Buffalo	Rectum
Buffalo_10646	VC_7513	37467	Medium-quality	uncertain_temperate	Nucleocytoviricota	Megaviricetes	Imitervirales	Mimiviridae	Mimivirus	Buffalo	Rectum
Buffalo_10647	VC_25276	29114	Medium-quality	uncertain_temperate	Uroviricota	Caudoviricetes	Unassigned	Casjensviridae	Chivirus	Buffalo	Rectum
Buffalo_10649	VC_25277	21097	Medium-quality	uncertain_temperate	Uroviricota	Caudoviricetes	Caudovirales	Podoviridae	Unassigned	Buffalo	Rectum
Buffalo_1065	VC_18964	34240	Medium-quality	uncertain_virulent	Unassigned	Naldaviricetes	Lefavirales	Baculoviridae	Betabaculovirus	Buffalo	Colon
Buffalo_10650	VC_7515	249980	Medium-quality	uncertain_virulent	Nucleocytoviricota	Pokkesviricetes	Chitovirales	Poxviridae	Betaentomopoxvirus	Buffalo	Rectum
Buffalo_10652	VC_25278	38885	Medium-quality	uncertain_temperate	Uroviricota	Caudoviricetes	Caudovirales	Podoviridae	Cimandefvirus	Buffalo	Rectum
Buffalo_10653	VC_7516	16341	Medium-quality	uncertain_virulent	Uroviricota	Caudoviricetes	Caudovirales	Podoviridae	Unassigned	Buffalo	Rectum
Buffalo_10654	VC_25279	267686	Complete	uncertain_virulent	Nucleocytoviricota	Megaviricetes	Imitervirales	Mimiviridae	Mimivirus	Buffalo	Rectum
Buffalo_10655	VC_4038	78388	Medium-quality	uncertain_virulent	Uroviricota	Caudoviricetes	Caudovirales	Demerecviridae	Cetovirus	Buffalo	Rectum
Buffalo_10657	VC_25280	50765	Medium-quality	uncertain_temperate	Nucleocytoviricota	Megaviricetes	Algavirales	Phycodnaviridae	Prasinovirus	Buffalo	Rectum
Buffalo_10658	VC_7518	55080	Medium-quality	uncertain_virulent	Unassigned	Unassigned	Unassigned	Unassigned	Unassigned	Buffalo	Rectum
Buffalo_10659	VC_25281	33516	Medium-quality	uncertain_temperate	Nucleocytoviricota	Megaviricetes	Imitervirales	Mimiviridae	Mimivirus	Buffalo	Rectum
Buffalo_1066	VC_18965	205846	Complete	uncertain_virulent	Uroviricota	Caudoviricetes	Caudovirales	Herelleviridae	Schiekvirus	Buffalo	Colon
Buffalo_10661	VC_2464	5265	Complete	uncertain_virulent	Phixviricota	Malgrandaviricetes	Petitvirales	Microviridae	Unassigned	Buffalo	Rectum
Buffalo_10662	VC_25282	91401	Medium-quality	uncertain_virulent	Nucleocytoviricota	Pokkesviricetes	Chitovirales	Poxviridae	Betaentomopoxvirus	Buffalo	Rectum
Buffalo_10663	VC_25283	41482	Medium-quality	uncertain_virulent	Uroviricota	Caudoviricetes	Caudovirales	Demerecviridae	Cetovirus	Buffalo	Rectum
Buffalo_10664	VC_920	38763	Medium-quality	uncertain_temperate	Uroviricota	Caudoviricetes	Caudovirales	Siphoviridae	Unassigned	Buffalo	Rectum
Buffalo_10666	VC_7521	44232	Medium-quality	uncertain_temperate	Nucleocytoviricota	Megaviricetes	Imitervirales	Mimiviridae	Mimivirus	Buffalo	Rectum
Buffalo_10667	VC_7522	36473	Medium-quality	uncertain_temperate	Uroviricota	Caudoviricetes	Caudovirales	Siphoviridae	Unassigned	Buffalo	Rectum
Buffalo_10668	VC_25284	42609	Medium-quality	uncertain_temperate	Uroviricota	Caudoviricetes	Caudovirales	Siphoviridae	Unassigned	Buffalo	Rectum
Buffalo_10669	VC_7523	6361	Complete	uncertain_virulent	Phixviricota	Malgrandaviricetes	Petitvirales	Microviridae	Unassigned	Buffalo	Rectum
Buffalo_1067	VC_18966	211708	High-quality	virulent	Uroviricota	Caudoviricetes	Caudovirales	Siphoviridae	Bronvirus	Buffalo	Colon
Buffalo_10670	VC_7524	70827	Medium-quality	uncertain_virulent	Unassigned	Unassigned	Unassigned	Unassigned	Unassigned	Buffalo	Rectum
Buffalo_10671	VC_7525	34576	Medium-quality	uncertain_virulent	Unassigned	Naldaviricetes	Lefavirales	Baculoviridae	Alphabaculovirus	Buffalo	Rectum
Buffalo_10672	VC_7526	6558	Complete	uncertain_virulent	Uroviricota	Caudoviricetes	Caudovirales	Myoviridae	Kolesnikvirus	Buffalo	Rectum
Buffalo_10673	VC_7527	42046	Medium-quality	uncertain_virulent	Unassigned	Unassigned	Unassigned	Unassigned	Unassigned	Buffalo	Rectum
Buffalo_10674	VC_4068	5986	Complete	virulent	Uroviricota	Caudoviricetes	Caudovirales	Myoviridae	Lazarusvirus	Buffalo	Rectum
Buffalo_10675	VC_25285	5492	Complete	uncertain_temperate	Uroviricota	Caudoviricetes	Caudovirales	Myoviridae	Fletchervirus	Buffalo	Rectum
Buffalo_10678	VC_25286	6402	Complete	uncertain_virulent	Phixviricota	Malgrandaviricetes	Petitvirales	Microviridae	Unassigned	Buffalo	Rectum
Buffalo_10679	VC_7528	18720	Medium-quality	uncertain_virulent	Uroviricota	Caudoviricetes	Caudovirales	Podoviridae	Unassigned	Buffalo	Rectum
Buffalo_1068	VC_7530	35625	Medium-quality	uncertain_temperate	Unassigned	Unassigned	Unassigned	Unassigned	Unassigned	Buffalo	Colon,Reticulum
Buffalo_10680	VC_7529	40747	Medium-quality	uncertain_virulent	Uroviricota	Caudoviricetes	Caudovirales	Myoviridae	Phikzvirus	Buffalo	Rectum
Buffalo_10681	VC_25287	44034	Medium-quality	temperate	Negarnaviricota	Ellioviricetes	Bunyavirales	Tospoviridae	Orthotospovirus	Buffalo	Rectum
Buffalo_10682	VC_25288	6686	Complete	uncertain_virulent	Unassigned	Unassigned	Unassigned	Unassigned	Unassigned	Buffalo	Rectum
Buffalo_10683	VC_25289	57202	Medium-quality	uncertain_temperate	Nucleocytoviricota	Megaviricetes	Imitervirales	Mimiviridae	Mimivirus	Buffalo	Rectum
Buffalo_10684	VC_25290	63625	Medium-quality	uncertain_virulent	Nucleocytoviricota	Megaviricetes	Algavirales	Phycodnaviridae	Prasinovirus	Buffalo	Rectum
Buffalo_10685	VC_25291	130314	Medium-quality	uncertain_virulent	Uroviricota	Caudoviricetes	Caudovirales	Siphoviridae	Audreyjarvisvirus	Buffalo	Rectum
Buffalo_10686	VC_4069	38115	Medium-quality	uncertain_temperate	Unassigned	Unassigned	Unassigned	Unassigned	Unassigned	Buffalo	Rectum
Buffalo_10687	VC_25292	66396	Medium-quality	uncertain_virulent	Unassigned	Unassigned	Unassigned	Unassigned	Unassigned	Buffalo	Rectum
Buffalo_10688	VC_25293	42512	Medium-quality	uncertain_virulent	Unassigned	Unassigned	Unassigned	Unassigned	Unassigned	Buffalo	Rectum
Buffalo_10689	VC_25294	5454	High-quality	uncertain_temperate	Negarnaviricota	Ellioviricetes	Bunyavirales	Peribunyaviridae	Orthobunyavirus	Buffalo	Rectum
Buffalo_1069	VC_18967	56701	Medium-quality	uncertain_temperate	Uroviricota	Caudoviricetes	Caudovirales	Siphoviridae	Samwavirus	Buffalo	Colon
Buffalo_10690	VC_25295	7643	High-quality	uncertain_virulent	Phixviricota	Malgrandaviricetes	Petitvirales	Microviridae	Unassigned	Buffalo	Rectum
Buffalo_10692	VC_25296	99930	High-quality	virulent	Uroviricota	Caudoviricetes	Caudovirales	Siphoviridae	Kenoshavirus	Buffalo	Rectum
Buffalo_10693	VC_25297	8496	Medium-quality	uncertain_temperate	Uroviricota	Caudoviricetes	Caudovirales	Myoviridae	Kolesnikvirus	Buffalo	Rectum
Buffalo_10694	VC_25298	163150	Complete	uncertain_virulent	Nucleocytoviricota	Pokkesviricetes	Chitovirales	Poxviridae	Betaentomopoxvirus	Buffalo	Rectum
Buffalo_10695	VC_25299	38856	Medium-quality	virulent	Uroviricota	Caudoviricetes	Caudovirales	Siphoviridae	Unassigned	Buffalo	Rectum
Buffalo_10696	VC_25300	5776	Complete	uncertain_virulent	Phixviricota	Malgrandaviricetes	Petitvirales	Microviridae	Unassigned	Buffalo	Rectum
Buffalo_10697	VC_7531	170037	Medium-quality	uncertain_virulent	Uroviricota	Caudoviricetes	Caudovirales	Siphoviridae	Audreyjarvisvirus	Buffalo	Rectum
Buffalo_10699	VC_25301	50701	Medium-quality	uncertain_virulent	Uroviricota	Caudoviricetes	Caudovirales	Podoviridae	Uetakevirus	Buffalo	Rectum
Buffalo_107	VC_18470	62773	Complete	uncertain_virulent	Unassigned	Unassigned	Unassigned	Unassigned	Unassigned	Buffalo	Rectum
Buffalo_10702	VC_25302	27100	Medium-quality	uncertain_temperate	Unassigned	Naldaviricetes	Lefavirales	Baculoviridae	Alphabaculovirus	Buffalo	Rectum
Buffalo_10705	VC_25303	62126	Medium-quality	virulent	Uroviricota	Caudoviricetes	Caudovirales	Siphoviridae	Kenoshavirus	Buffalo	Rectum
Buffalo_10706	VC_25304	41385	Medium-quality	uncertain_temperate	Unassigned	Unassigned	Unassigned	Unassigned	Unassigned	Buffalo	Rectum
Buffalo_10708	VC_25306	6721	High-quality	uncertain_virulent	Unassigned	Unassigned	Unassigned	Unassigned	Unassigned	Buffalo	Rectum
Buffalo_10709	VC_25307	123458	Medium-quality	uncertain_temperate	Unassigned	Unassigned	Unassigned	Polydnaviriformidae	Ichnoviriform	Buffalo	Rectum
Buffalo_10710	VC_7534	19562	Medium-quality	uncertain_virulent	Unassigned	Unassigned	Unassigned	Unassigned	Unassigned	Buffalo	Rectum
Buffalo_10711	VC_25308	40355	Medium-quality	uncertain_temperate	Nucleocytoviricota	Megaviricetes	Imitervirales	Mimiviridae	Mimivirus	Buffalo	Rectum
Buffalo_10713	VC_25309	31900	Medium-quality	uncertain_temperate	Uroviricota	Caudoviricetes	Caudovirales	Siphoviridae	Smoothievirus	Buffalo	Rectum
Buffalo_10714	VC_4064	42983	Medium-quality	uncertain_virulent	Unassigned	Unassigned	Unassigned	Unassigned	Unassigned	Buffalo	Rectum
Buffalo_10715	VC_7536	18251	Medium-quality	virulent	Unassigned	Naldaviricetes	Lefavirales	Baculoviridae	Alphabaculovirus	Buffalo	Rectum
Buffalo_10716	VC_25310	24579	Medium-quality	uncertain_virulent	Unassigned	Unassigned	Unassigned	Unassigned	Unassigned	Buffalo	Rectum
Buffalo_10717	VC_25311	39211	Medium-quality	uncertain_virulent	Uroviricota	Caudoviricetes	Caudovirales	Siphoviridae	Cequinquevirus	Buffalo	Rectum
Buffalo_10718	VC_25312	22785	Medium-quality	uncertain_temperate	Uroviricota	Caudoviricetes	Caudovirales	Siphoviridae	Sozzivirus	Buffalo	Rectum
Buffalo_10719	VC_7537	65481	High-quality	uncertain_temperate	Uroviricota	Caudoviricetes	Caudovirales	Siphoviridae	Nevevirus	Buffalo	Rectum
Buffalo_1072	VC_18968	88799	Medium-quality	uncertain_virulent	Nucleocytoviricota	Pokkesviricetes	Chitovirales	Poxviridae	Betaentomopoxvirus	Buffalo	Colon
Buffalo_10720	VC_25313	38810	Medium-quality	temperate	Uroviricota	Caudoviricetes	Caudovirales	Siphoviridae	Efquatrovirus	Buffalo	Rectum
Buffalo_10721	VC_25314	16405	Medium-quality	uncertain_virulent	Unassigned	Unassigned	Unassigned	Unassigned	Unassigned	Buffalo	Rectum
Buffalo_10723	VC_4036	5444	Medium-quality	uncertain_virulent	Phixviricota	Malgrandaviricetes	Petitvirales	Microviridae	Unassigned	Buffalo	Rectum
Buffalo_10724	VC_25315	41353	Medium-quality	uncertain_virulent	Unassigned	Unassigned	Unassigned	Unassigned	Unassigned	Buffalo	Rectum
Buffalo_10725	VC_25316	7856	High-quality	uncertain_virulent	Phixviricota	Malgrandaviricetes	Petitvirales	Microviridae	Unassigned	Buffalo	Rectum
Buffalo_10726	VC_25317	17415	Medium-quality	uncertain_virulent	Uroviricota	Caudoviricetes	Caudovirales	Podoviridae	Unassigned	Buffalo	Rectum
Buffalo_10727	VC_2471	34187	Medium-quality	uncertain_temperate	Unassigned	Unassigned	Unassigned	Unassigned	Unassigned	Buffalo	Rectum
Buffalo_10728	VC_25318	31615	Medium-quality	uncertain_virulent	Unassigned	Naldaviricetes	Lefavirales	Baculoviridae	Alphabaculovirus	Buffalo	Rectum
Buffalo_10729	VC_25319	55490	Medium-quality	uncertain_virulent	Nucleocytoviricota	Megaviricetes	Pimascovirales	Marseilleviridae	Marseillevirus	Buffalo	Rectum
Buffalo_1073	VC_18969	42047	Medium-quality	uncertain_temperate	Unassigned	Naldaviricetes	Lefavirales	Baculoviridae	Alphabaculovirus	Buffalo	Colon
Buffalo_10731	VC_25320	56449	Medium-quality	uncertain_temperate	Unassigned	Unassigned	Unassigned	Unassigned	Unassigned	Buffalo	Rectum
Buffalo_10732	VC_7539	35832	Medium-quality	uncertain_virulent	Uroviricota	Caudoviricetes	Caudovirales	Demerecviridae	Tequintavirus	Buffalo	Rectum
Buffalo_10733	VC_25321	38292	Medium-quality	uncertain_virulent	Unassigned	Unassigned	Unassigned	Unassigned	Unassigned	Buffalo	Rectum
Buffalo_10734	VC_25322	17270	Medium-quality	uncertain_virulent	Uroviricota	Caudoviricetes	Caudovirales	Podoviridae	Unassigned	Buffalo	Rectum
Buffalo_10736	VC_25323	54290	Medium-quality	uncertain_virulent	Uroviricota	Caudoviricetes	Caudovirales	Siphoviridae	Kenoshavirus	Buffalo	Rectum
Buffalo_10737	VC_25324	34528	Medium-quality	uncertain_virulent	Nucleocytoviricota	Megaviricetes	Imitervirales	Mimiviridae	Mimivirus	Buffalo	Rectum
Buffalo_10738	VC_25325	41079	Medium-quality	uncertain_virulent	Unassigned	Unassigned	Unassigned	Unassigned	Unassigned	Buffalo	Rectum
Buffalo_1074	VC_18970	41945	Medium-quality	uncertain_temperate	Nucleocytoviricota	Pokkesviricetes	Chitovirales	Poxviridae	Betaentomopoxvirus	Buffalo	Colon
Buffalo_10740	VC_25326	71072	High-quality	virulent	Uroviricota	Caudoviricetes	Caudovirales	Siphoviridae	Kenoshavirus	Buffalo	Rectum
Buffalo_10741	VC_4071	20086	Medium-quality	uncertain_temperate	Uroviricota	Caudoviricetes	Caudovirales	Podoviridae	Unassigned	Buffalo	Rectum
Buffalo_10742	VC_7541	18951	Medium-quality	uncertain_temperate	Uroviricota	Caudoviricetes	Caudovirales	Podoviridae	Unassigned	Buffalo	Rectum
Buffalo_10743	VC_25327	19663	Medium-quality	uncertain_virulent	Uroviricota	Caudoviricetes	Caudovirales	Guelinviridae	Brucesealvirus	Buffalo	Rectum
Buffalo_10745	VC_4072	36098	Medium-quality	uncertain_temperate	Nucleocytoviricota	Pokkesviricetes	Chitovirales	Poxviridae	Betaentomopoxvirus	Buffalo	Rectum
Buffalo_10747	VC_25328	28352	Medium-quality	uncertain_temperate	Uroviricota	Caudoviricetes	Caudovirales	Siphoviridae	Soupsvirus	Buffalo	Rectum
Buffalo_10748	VC_4073	41675	Medium-quality	uncertain_virulent	Negarnaviricota	Ellioviricetes	Bunyavirales	Tospoviridae	Orthotospovirus	Buffalo	Rectum
Buffalo_10749	VC_25329	30210	Medium-quality	uncertain_temperate	Unassigned	Unassigned	Unassigned	Unassigned	Unassigned	Buffalo	Rectum
Buffalo_1075	VC_18971	42500	Medium-quality	uncertain_virulent	Uroviricota	Caudoviricetes	Caudovirales	Siphoviridae	Unassigned	Buffalo	Colon
Buffalo_10751	VC_25330	4921	Medium-quality	virulent	Nucleocytoviricota	Pokkesviricetes	Chitovirales	Poxviridae	Betaentomopoxvirus	Buffalo	Rectum
Buffalo_10752	VC_25331	45620	Medium-quality	uncertain_temperate	Peploviricota	Herviviricetes	Herpesvirales	Herpesviridae	Varicellovirus	Buffalo	Rectum
Buffalo_10753	VC_2456	15435	Medium-quality	uncertain_virulent	Unassigned	Unassigned	Unassigned	Unassigned	Unassigned	Buffalo	Rectum
Buffalo_10754	VC_25332	15165	Medium-quality	virulent	Nucleocytoviricota	Pokkesviricetes	Chitovirales	Poxviridae	Betaentomopoxvirus	Buffalo	Rectum
Buffalo_10755	VC_7454	36636	Medium-quality	uncertain_temperate	Uroviricota	Caudoviricetes	Caudovirales	Siphoviridae	Unassigned	Buffalo	Rectum
Buffalo_10756	VC_25333	172555	Complete	uncertain_virulent	Uroviricota	Caudoviricetes	Caudovirales	Myoviridae	Brizovirus	Buffalo	Rectum
Buffalo_10757	VC_25334	33628	Medium-quality	virulent	Unassigned	Unassigned	Unassigned	Unassigned	Unassigned	Buffalo	Rectum
Buffalo_10758	VC_25335	40838	Medium-quality	uncertain_virulent	Uroviricota	Caudoviricetes	Caudovirales	Myoviridae	Yongloolinvirus	Buffalo	Rectum
Buffalo_10759	VC_25336	41311	Medium-quality	uncertain_temperate	Unassigned	Unassigned	Unassigned	Unassigned	Unassigned	Buffalo	Rectum
Buffalo_1076	VC_18972	37616	Medium-quality	uncertain_temperate	Nucleocytoviricota	Pokkesviricetes	Chitovirales	Poxviridae	Betaentomopoxvirus	Buffalo	Colon
Buffalo_10760	VC_25337	53565	Medium-quality	uncertain_temperate	Nucleocytoviricota	Pokkesviricetes	Chitovirales	Poxviridae	Betaentomopoxvirus	Buffalo	Rectum
Buffalo_10761	VC_25338	41233	Medium-quality	temperate	Uroviricota	Caudoviricetes	Caudovirales	Siphoviridae	Unassigned	Buffalo	Rectum
Buffalo_10762	VC_25339	43562	Medium-quality	uncertain_temperate	Uroviricota	Caudoviricetes	Caudovirales	Siphoviridae	Unassigned	Buffalo	Rectum
Buffalo_10763	VC_25340	87572	Medium-quality	uncertain_virulent	Uroviricota	Caudoviricetes	Caudovirales	Herelleviridae	Kayvirus	Buffalo	Rectum
Buffalo_10764	VC_7543	6031	Complete	virulent	Unassigned	Unassigned	Unassigned	Unassigned	Unassigned	Buffalo	Rectum
Buffalo_10765	VC_25341	30729	Medium-quality	uncertain_temperate	Nucleocytoviricota	Pokkesviricetes	Chitovirales	Poxviridae	Betaentomopoxvirus	Buffalo	Rectum
Buffalo_10766	VC_25342	81940	Medium-quality	uncertain_virulent	Unassigned	Unassigned	Unassigned	Unassigned	Unassigned	Buffalo	Rectum
Buffalo_10767	VC_4054	32587	Medium-quality	uncertain_temperate	Unassigned	Unassigned	Unassigned	Unassigned	Unassigned	Buffalo	Rectum
Buffalo_10768	VC_7544	6079	Complete	uncertain_virulent	Nucleocytoviricota	Pokkesviricetes	Chitovirales	Poxviridae	Betaentomopoxvirus	Buffalo	Rectum
Buffalo_10769	VC_25343	6971	Complete	uncertain_virulent	Unassigned	Unassigned	Unassigned	Unassigned	Unassigned	Buffalo	Rectum
Buffalo_1077	VC_2472	5869	Medium-quality	uncertain_virulent	Phixviricota	Malgrandaviricetes	Petitvirales	Microviridae	Unassigned	Buffalo	Colon
Buffalo_10770	VC_25344	67921	Medium-quality	uncertain_virulent	Peploviricota	Herviviricetes	Herpesvirales	Alloherpesviridae	Cyprinivirus	Buffalo	Rectum
Buffalo_10771	VC_1173	5334	Complete	uncertain_virulent	Phixviricota	Malgrandaviricetes	Petitvirales	Microviridae	Unassigned	Buffalo	Rectum
Buffalo_10772	VC_25345	5200	Complete	uncertain_virulent	Phixviricota	Malgrandaviricetes	Petitvirales	Microviridae	Unassigned	Buffalo	Rectum
Buffalo_10773	VC_4074	5056	Medium-quality	virulent	Unassigned	Naldaviricetes	Lefavirales	Baculoviridae	Alphabaculovirus	Buffalo	Rectum
Buffalo_10774	VC_25346	43406	Medium-quality	uncertain_virulent	Unassigned	Unassigned	Unassigned	Unassigned	Unassigned	Buffalo	Rectum
Buffalo_10775	VC_25347	34271	Medium-quality	uncertain_temperate	Unassigned	Unassigned	Unassigned	Unassigned	Unassigned	Buffalo	Rectum
Buffalo_10776	VC_25348	5178	Medium-quality	virulent	Phixviricota	Malgrandaviricetes	Petitvirales	Microviridae	Unassigned	Buffalo	Rectum
Buffalo_10777	VC_25349	6269	Complete	uncertain_temperate	Unassigned	Unassigned	Unassigned	Polydnaviriformidae	Bracoviriform	Buffalo	Rectum
Buffalo_10778	VC_1673	7182	Complete	uncertain_virulent	Cossaviricota	Papovaviricetes	Zurhausenvirales	Papillomaviridae	Omegapapillomavirus	Buffalo	Rectum
Buffalo_10779	VC_25350	6527	Complete	virulent	Unassigned	Unassigned	Unassigned	Unassigned	Unassigned	Buffalo	Rectum
Buffalo_10780	VC_728	5613	Complete	uncertain_temperate	Phixviricota	Malgrandaviricetes	Petitvirales	Microviridae	Unassigned	Buffalo	Rectum
Buffalo_10781	VC_1686	48078	Medium-quality	uncertain_virulent	Unassigned	Unassigned	Unassigned	Unassigned	Unassigned	Buffalo	Rectum
Buffalo_10782	VC_25351	14535	Medium-quality	uncertain_virulent	Unassigned	Unassigned	Unassigned	Unassigned	Unassigned	Buffalo	Rectum
Buffalo_10783	VC_25352	69495	Medium-quality	uncertain_virulent	Nucleocytoviricota	Megaviricetes	Imitervirales	Mimiviridae	Mimivirus	Buffalo	Rectum
Buffalo_10784	VC_25353	14250	Medium-quality	uncertain_virulent	Peploviricota	Herviviricetes	Herpesvirales	Herpesviridae	Varicellovirus	Buffalo	Rectum
Buffalo_10785	VC_25354	26162	Medium-quality	virulent	Unassigned	Unassigned	Unassigned	Unassigned	Unassigned	Buffalo	Rectum
Buffalo_10786	VC_7545	41992	Medium-quality	uncertain_temperate	Uroviricota	Caudoviricetes	Caudovirales	Siphoviridae	Unassigned	Buffalo	Rectum
Buffalo_10787	VC_7540	5897	Complete	virulent	Unassigned	Unassigned	Unassigned	Unassigned	Unassigned	Buffalo	Rectum
Buffalo_10788	VC_4075	90632	Medium-quality	uncertain_virulent	Unassigned	Unassigned	Unassigned	Unassigned	Unassigned	Buffalo	Rectum
Buffalo_10789	VC_1176	39648	Medium-quality	virulent	Unassigned	Unassigned	Unassigned	Unassigned	Unassigned	Buffalo	Rectum
Buffalo_1079	VC_18973	37813	Medium-quality	uncertain_temperate	Unassigned	Naldaviricetes	Lefavirales	Baculoviridae	Alphabaculovirus	Buffalo	Colon
Buffalo_10790	VC_7547	114113	Medium-quality	uncertain_temperate	Unassigned	Unassigned	Unassigned	Polydnaviriformidae	Ichnoviriform	Buffalo	Rectum
Buffalo_10791	VC_25355	15297	Medium-quality	virulent	Uroviricota	Caudoviricetes	Caudovirales	Podoviridae	Unassigned	Buffalo	Rectum
Buffalo_10792	VC_25356	14750	Medium-quality	uncertain_virulent	Unassigned	Unassigned	Unassigned	Unassigned	Unassigned	Buffalo	Rectum
Buffalo_10794	VC_25358	58474	Medium-quality	uncertain_temperate	Uroviricota	Caudoviricetes	Caudovirales	Siphoviridae	Unassigned	Buffalo	Rectum
Buffalo_10795	VC_1687	30554	Medium-quality	uncertain_temperate	Nucleocytoviricota	Pokkesviricetes	Chitovirales	Poxviridae	Betaentomopoxvirus	Buffalo	Rectum
Buffalo_10796	VC_25359	5168	Medium-quality	virulent	Phixviricota	Malgrandaviricetes	Petitvirales	Microviridae	Unassigned	Buffalo	Rectum
Buffalo_10798	VC_25361	86531	Medium-quality	uncertain_virulent	Nucleocytoviricota	Pokkesviricetes	Chitovirales	Poxviridae	Betaentomopoxvirus	Buffalo	Rectum
Buffalo_10799	VC_25362	128781	Medium-quality	uncertain_temperate	Nucleocytoviricota	Pokkesviricetes	Chitovirales	Poxviridae	Betaentomopoxvirus	Buffalo	Rectum
Buffalo_108	VC_18471	44889	Medium-quality	uncertain_virulent	Uroviricota	Caudoviricetes	Caudovirales	Siphoviridae	Fromanvirus	Buffalo	Rectum
Buffalo_1080	VC_18974	15746	Medium-quality	uncertain_virulent	Nucleocytoviricota	Pokkesviricetes	Chitovirales	Poxviridae	Betaentomopoxvirus	Buffalo	Colon
Buffalo_10800	VC_25363	38236	Medium-quality	uncertain_temperate	Unassigned	Unassigned	Unassigned	Unassigned	Unassigned	Buffalo	Rectum
Buffalo_10801	VC_25364	4895	Medium-quality	virulent	Peploviricota	Herviviricetes	Herpesvirales	Herpesviridae	Proboscivirus	Buffalo	Rectum
Buffalo_10802	VC_25365	122142	Medium-quality	uncertain_temperate	Nucleocytoviricota	Pokkesviricetes	Chitovirales	Poxviridae	Betaentomopoxvirus	Buffalo	Rectum
Buffalo_10803	VC_25366	47323	Medium-quality	uncertain_temperate	Nucleocytoviricota	Megaviricetes	Imitervirales	Mimiviridae	Mimivirus	Buffalo	Rectum
Buffalo_10804	VC_25367	48319	Medium-quality	uncertain_virulent	Nucleocytoviricota	Pokkesviricetes	Chitovirales	Poxviridae	Orthopoxvirus	Buffalo	Rectum
Buffalo_10805	VC_7548	62738	Medium-quality	uncertain_temperate	Uroviricota	Caudoviricetes	Caudovirales	Siphoviridae	Triavirus	Buffalo	Rectum
Buffalo_10806	VC_25368	35348	Medium-quality	uncertain_virulent	Unassigned	Unassigned	Unassigned	Unassigned	Unassigned	Buffalo	Rectum
Buffalo_10807	VC_25369	17687	Medium-quality	uncertain_virulent	Uroviricota	Caudoviricetes	Caudovirales	Podoviridae	Unassigned	Buffalo	Rectum
Buffalo_10808	VC_25370	72950	High-quality	virulent	Uroviricota	Caudoviricetes	Caudovirales	Schitoviridae	Gamaleyavirus	Buffalo	Rectum
Buffalo_10809	VC_25371	224581	High-quality	uncertain_virulent	Nucleocytoviricota	Pokkesviricetes	Chitovirales	Poxviridae	Betaentomopoxvirus	Buffalo	Rectum
Buffalo_1081	VC_7552	56438	Medium-quality	uncertain_virulent	Unassigned	Unassigned	Unassigned	Unassigned	Unassigned	Buffalo	Colon,Abomasum
Buffalo_10811	VC_25372	142393	Medium-quality	uncertain_virulent	Unassigned	Naldaviricetes	Lefavirales	Baculoviridae	Alphabaculovirus	Buffalo	Rectum
Buffalo_10812	VC_1177	121472	Medium-quality	uncertain_virulent	Uroviricota	Caudoviricetes	Caudovirales	Siphoviridae	Unassigned	Buffalo	Rectum
Buffalo_10813	VC_25373	45251	Medium-quality	uncertain_virulent	Uroviricota	Caudoviricetes	Caudovirales	Siphoviridae	Unassigned	Buffalo	Rectum
Buffalo_10814	VC_25374	16611	Medium-quality	uncertain_temperate	Unassigned	Naldaviricetes	Lefavirales	Baculoviridae	Alphabaculovirus	Buffalo	Rectum
Buffalo_10815	VC_25375	182001	Medium-quality	uncertain_virulent	Uroviricota	Caudoviricetes	Caudovirales	Siphoviridae	Audreyjarvisvirus	Buffalo	Rectum
Buffalo_10816	VC_25376	199128	Complete	uncertain_virulent	Uroviricota	Caudoviricetes	Caudovirales	Siphoviridae	Audreyjarvisvirus	Buffalo	Rectum
Buffalo_10817	VC_1688	50474	Medium-quality	uncertain_temperate	Uroviricota	Caudoviricetes	Caudovirales	Siphoviridae	Unassigned	Buffalo	Rectum
Buffalo_10818	VC_25377	28506	Medium-quality	uncertain_temperate	Unassigned	Unassigned	Unassigned	Unassigned	Unassigned	Buffalo	Rectum
Buffalo_10819	VC_7551	5227	Complete	uncertain_temperate	Phixviricota	Malgrandaviricetes	Petitvirales	Microviridae	Unassigned	Buffalo	Rectum
Buffalo_1082	VC_18975	37827	Medium-quality	uncertain_temperate	Nucleocytoviricota	Megaviricetes	Algavirales	Phycodnaviridae	Chlorovirus	Buffalo	Colon
Buffalo_10820	VC_7553	6287	Complete	virulent	Unassigned	Unassigned	Unassigned	Unassigned	Unassigned	Buffalo	Rectum
Buffalo_10821	VC_25378	98291	Medium-quality	uncertain_temperate	Uroviricota	Caudoviricetes	Caudovirales	Herelleviridae	Pecentumvirus	Buffalo	Rectum
Buffalo_10822	VC_25379	40842	Medium-quality	uncertain_temperate	Uroviricota	Caudoviricetes	Caudovirales	Siphoviridae	Unassigned	Buffalo	Rectum
Buffalo_10823	VC_25380	234270	Medium-quality	uncertain_virulent	Nucleocytoviricota	Pokkesviricetes	Chitovirales	Poxviridae	Betaentomopoxvirus	Buffalo	Rectum
Buffalo_10824	VC_25381	42367	Medium-quality	uncertain_virulent	Unassigned	Unassigned	Unassigned	Unassigned	Unassigned	Buffalo	Rectum
Buffalo_10825	VC_25382	29393	Medium-quality	uncertain_virulent	Unassigned	Unassigned	Unassigned	Unassigned	Unassigned	Buffalo	Rectum
Buffalo_10826	VC_25383	34574	Medium-quality	uncertain_temperate	Uroviricota	Caudoviricetes	Caudovirales	Siphoviridae	Coventryvirus	Buffalo	Rectum
Buffalo_10827	VC_25384	6463	Medium-quality	uncertain_virulent	Phixviricota	Malgrandaviricetes	Petitvirales	Microviridae	Unassigned	Buffalo	Rectum
Buffalo_10828	VC_1167	46140	Medium-quality	virulent	Uroviricota	Caudoviricetes	Caudovirales	Myoviridae	Tequatrovirus	Buffalo	Rectum
Buffalo_10829	VC_1166	45044	Medium-quality	uncertain_temperate	Uroviricota	Caudoviricetes	Caudovirales	Siphoviridae	Unassigned	Buffalo	Rectum
Buffalo_10830	VC_25385	60949	Complete	uncertain_virulent	Uroviricota	Caudoviricetes	Caudovirales	Siphoviridae	Kenoshavirus	Buffalo	Rectum
Buffalo_10831	VC_25386	86676	Medium-quality	uncertain_virulent	Unassigned	Naldaviricetes	Lefavirales	Baculoviridae	Alphabaculovirus	Buffalo	Rectum
Buffalo_10832	VC_4077	84277	Medium-quality	virulent	Kitrinoviricota	Alsuviricetes	Martellivirales	Closteroviridae	Crinivirus	Buffalo	Rectum
Buffalo_10833	VC_25387	73143	Complete	virulent	Uroviricota	Caudoviricetes	Caudovirales	Myoviridae	Gaprivervirus	Buffalo	Rectum
Buffalo_10834	VC_2473	51516	Medium-quality	uncertain_virulent	Nucleocytoviricota	Pokkesviricetes	Chitovirales	Poxviridae	Parapoxvirus	Buffalo	Rectum
Buffalo_10835	VC_25388	36459	Medium-quality	uncertain_virulent	Unassigned	Naldaviricetes	Lefavirales	Baculoviridae	Alphabaculovirus	Buffalo	Rectum
Buffalo_10836	VC_25389	42184	Medium-quality	uncertain_temperate	Uroviricota	Caudoviricetes	Caudovirales	Siphoviridae	Nevevirus	Buffalo	Rectum
Buffalo_10837	VC_2438	49286	Medium-quality	uncertain_virulent	Uroviricota	Caudoviricetes	Caudovirales	Demerecviridae	Tequintavirus	Buffalo	Rectum
Buffalo_10838	VC_4078	36260	Medium-quality	virulent	Unassigned	Unassigned	Unassigned	Unassigned	Unassigned	Buffalo	Rectum
Buffalo_10839	VC_2474	64774	Medium-quality	virulent	Uroviricota	Caudoviricetes	Caudovirales	Myoviridae	Tequatrovirus	Buffalo	Rectum
Buffalo_10840	VC_25390	77502	Medium-quality	uncertain_virulent	Uroviricota	Caudoviricetes	Caudovirales	Siphoviridae	Unassigned	Buffalo	Rectum
Buffalo_10841	VC_25391	50723	Medium-quality	uncertain_temperate	Uroviricota	Caudoviricetes	Caudovirales	Podoviridae	Lederbergvirus	Buffalo	Rectum
Buffalo_10842	VC_7554	6009	Medium-quality	uncertain_virulent	Uroviricota	Caudoviricetes	Caudovirales	Myoviridae	Eurybiavirus	Buffalo	Rectum
Buffalo_10843	VC_576	27714	Medium-quality	uncertain_virulent	Peploviricota	Herviviricetes	Herpesvirales	Alloherpesviridae	Cyprinivirus	Buffalo	Rectum
Buffalo_10844	VC_25392	6162	Complete	virulent	Unassigned	Naldaviricetes	Lefavirales	Baculoviridae	Alphabaculovirus	Buffalo	Rectum
Buffalo_10845	VC_25393	5443	Complete	uncertain_temperate	Phixviricota	Malgrandaviricetes	Petitvirales	Microviridae	Unassigned	Buffalo	Rectum
Buffalo_10847	VC_11583	97986	Medium-quality	uncertain_virulent	Nucleocytoviricota	Pokkesviricetes	Chitovirales	Poxviridae	Betaentomopoxvirus	Buffalo	Rectum
Buffalo_10848	VC_7555	46929	Medium-quality	uncertain_virulent	Unassigned	Unassigned	Unassigned	Unassigned	Unassigned	Buffalo	Rectum
Buffalo_10849	VC_4080	85559	Medium-quality	uncertain_virulent	Peploviricota	Herviviricetes	Herpesvirales	Herpesviridae	Macavirus	Buffalo	Rectum
Buffalo_1085	VC_18976	30919	Medium-quality	uncertain_temperate	Nucleocytoviricota	Pokkesviricetes	Chitovirales	Poxviridae	Betaentomopoxvirus	Buffalo	Colon
Buffalo_10850	VC_1689	141079	Medium-quality	uncertain_temperate	Peploviricota	Herviviricetes	Herpesvirales	Herpesviridae	Cytomegalovirus	Buffalo	Rectum
Buffalo_10851	VC_25394	30939	Medium-quality	uncertain_temperate	Uroviricota	Caudoviricetes	Caudovirales	Siphoviridae	Unassigned	Buffalo	Rectum
Buffalo_10852	VC_7556	6454	Complete	virulent	Nucleocytoviricota	Megaviricetes	Imitervirales	Mimiviridae	Mimivirus	Buffalo	Rectum
Buffalo_10853	VC_25395	28174	Medium-quality	temperate	Unassigned	Naldaviricetes	Lefavirales	Baculoviridae	Alphabaculovirus	Buffalo	Rectum
Buffalo_10854	VC_25396	55164	Medium-quality	uncertain_temperate	Uroviricota	Caudoviricetes	Caudovirales	Myoviridae	Tequatrovirus	Buffalo	Rectum
Buffalo_10855	VC_7557	188062	High-quality	virulent	Uroviricota	Caudoviricetes	Caudovirales	Herelleviridae	Caeruleovirus	Buffalo	Rectum
Buffalo_10857	VC_25397	28660	Medium-quality	uncertain_virulent	Uroviricota	Caudoviricetes	Caudovirales	Siphoviridae	Unassigned	Buffalo	Rectum
Buffalo_10858	VC_25398	5330	Complete	uncertain_virulent	Phixviricota	Malgrandaviricetes	Petitvirales	Microviridae	Unassigned	Buffalo	Rectum
Buffalo_10859	VC_25399	123352	Medium-quality	uncertain_temperate	Nucleocytoviricota	Pokkesviricetes	Chitovirales	Poxviridae	Betaentomopoxvirus	Buffalo	Rectum
Buffalo_1086	VC_7558	40297	Medium-quality	uncertain_virulent	Negarnaviricota	Ellioviricetes	Bunyavirales	Arenaviridae	Mammarenavirus	Buffalo	Colon
Buffalo_10860	VC_4012	100587	Medium-quality	virulent	Nucleocytoviricota	Pokkesviricetes	Chitovirales	Poxviridae	Betaentomopoxvirus	Buffalo	Rectum
Buffalo_10861	VC_25400	103952	Medium-quality	uncertain_virulent	Nucleocytoviricota	Megaviricetes	Imitervirales	Mimiviridae	Mimivirus	Buffalo	Rectum
Buffalo_10862	VC_25401	64214	Medium-quality	uncertain_temperate	Unassigned	Unassigned	Unassigned	Unassigned	Unassigned	Buffalo	Rectum
Buffalo_10863	VC_1690	147248	Medium-quality	uncertain_virulent	Nucleocytoviricota	Pokkesviricetes	Chitovirales	Poxviridae	Betaentomopoxvirus	Buffalo	Rectum
Buffalo_10864	VC_25402	45375	Medium-quality	temperate	Uroviricota	Caudoviricetes	Caudovirales	Siphoviridae	Unassigned	Buffalo	Rectum
Buffalo_10865	VC_4081	36895	Medium-quality	uncertain_virulent	Uroviricota	Caudoviricetes	Caudovirales	Siphoviridae	Unassigned	Buffalo	Rectum
Buffalo_10867	VC_25403	16113	Medium-quality	uncertain_virulent	Unassigned	Unassigned	Unassigned	Unassigned	Unassigned	Buffalo	Rectum
Buffalo_10869	VC_25404	122553	Medium-quality	uncertain_virulent	Nucleocytoviricota	Pokkesviricetes	Chitovirales	Poxviridae	Betaentomopoxvirus	Buffalo	Rectum
Buffalo_1087	VC_1179	37934	Medium-quality	uncertain_virulent	Nucleocytoviricota	Megaviricetes	Algavirales	Phycodnaviridae	Prasinovirus	Buffalo	Colon,Omasum,Rumen,Reticulum
Buffalo_10870	VC_7559	72939	Complete	virulent	Uroviricota	Caudoviricetes	Caudovirales	Schitoviridae	Gamaleyavirus	Buffalo	Rectum
Buffalo_10871	VC_7560	145535	Medium-quality	uncertain_virulent	Nucleocytoviricota	Pokkesviricetes	Chitovirales	Poxviridae	Betaentomopoxvirus	Buffalo	Rectum
Buffalo_10872	VC_25405	93517	Medium-quality	uncertain_temperate	Unassigned	Naldaviricetes	Lefavirales	Baculoviridae	Alphabaculovirus	Buffalo	Rectum
Buffalo_10873	VC_7561	66042	Medium-quality	uncertain_virulent	Unassigned	Unassigned	Unassigned	Unassigned	Unassigned	Buffalo	Rectum
Buffalo_10874	VC_25406	124246	Medium-quality	uncertain_temperate	Uroviricota	Caudoviricetes	Caudovirales	Myoviridae	Bixzunavirus	Buffalo	Rectum
Buffalo_10875	VC_25407	36154	Medium-quality	uncertain_temperate	Uroviricota	Caudoviricetes	Caudovirales	Siphoviridae	Cequinquevirus	Buffalo	Rectum
Buffalo_10876	VC_25408	27377	Medium-quality	temperate	Uroviricota	Caudoviricetes	Caudovirales	Siphoviridae	Brussowvirus	Buffalo	Rectum
Buffalo_10877	VC_7562	6017	Medium-quality	temperate	Pisuviricota	Pisoniviricetes	Nidovirales	Coronaviridae	Alphacoronavirus	Buffalo	Rectum
Buffalo_10878	VC_25409	95156	Medium-quality	uncertain_virulent	Nucleocytoviricota	Pokkesviricetes	Chitovirales	Poxviridae	Betaentomopoxvirus	Buffalo	Rectum
Buffalo_10879	VC_7563	7399	High-quality	uncertain_virulent	Unassigned	Unassigned	Unassigned	Unassigned	Unassigned	Buffalo	Rectum
Buffalo_1088	VC_18977	56895	Medium-quality	uncertain_temperate	Unassigned	Unassigned	Unassigned	Polydnaviriformidae	Ichnoviriform	Buffalo	Colon
Buffalo_10880	VC_4083	45392	Medium-quality	uncertain_temperate	Uroviricota	Caudoviricetes	Caudovirales	Myoviridae	Phapecoctavirus	Buffalo	Rectum
Buffalo_10881	VC_25410	45020	Medium-quality	uncertain_temperate	Nucleocytoviricota	Megaviricetes	Imitervirales	Mimiviridae	Mimivirus	Buffalo	Rectum
Buffalo_10882	VC_25411	5986	Complete	uncertain_temperate	Nucleocytoviricota	Pokkesviricetes	Chitovirales	Poxviridae	Betaentomopoxvirus	Buffalo	Rectum
Buffalo_10883	VC_7564	5289	Complete	uncertain_virulent	Nucleocytoviricota	Pokkesviricetes	Asfuvirales	Asfarviridae	Asfivirus	Buffalo	Rectum
Buffalo_10884	VC_7413	6478	Complete	virulent	Unassigned	Naldaviricetes	Lefavirales	Baculoviridae	Alphabaculovirus	Buffalo	Rectum
Buffalo_10885	VC_4084	6261	Complete	uncertain_temperate	Uroviricota	Caudoviricetes	Caudovirales	Herelleviridae	Caeruleovirus	Buffalo	Rectum
Buffalo_10886	VC_25412	5024	Complete	virulent	Uroviricota	Caudoviricetes	Caudovirales	Myoviridae	Libanvirus	Buffalo	Rectum
Buffalo_10887	VC_25413	4929	Medium-quality	virulent	Phixviricota	Malgrandaviricetes	Petitvirales	Microviridae	Unassigned	Buffalo	Rectum
Buffalo_10889	VC_1687	30590	Medium-quality	uncertain_virulent	Nucleocytoviricota	Pokkesviricetes	Chitovirales	Poxviridae	Betaentomopoxvirus	Buffalo	Rectum
Buffalo_1089	VC_18978	45792	Medium-quality	uncertain_virulent	Unassigned	Naldaviricetes	Lefavirales	Baculoviridae	Betabaculovirus	Buffalo	Colon
Buffalo_10890	VC_7566	247936	Complete	uncertain_virulent	Nucleocytoviricota	Megaviricetes	Imitervirales	Mimiviridae	Mimivirus	Buffalo	Rectum
Buffalo_10891	VC_25414	37715	Medium-quality	uncertain_temperate	Uroviricota	Caudoviricetes	Caudovirales	Myoviridae	Jilinvirus	Buffalo	Rectum
Buffalo_10892	VC_1692	51441	Medium-quality	uncertain_virulent	Uroviricota	Caudoviricetes	Caudovirales	Demerecviridae	Tequintavirus	Buffalo	Rectum
Buffalo_10893	VC_7545	42201	Medium-quality	uncertain_temperate	Uroviricota	Caudoviricetes	Caudovirales	Siphoviridae	Unassigned	Buffalo	Rectum
Buffalo_10894	VC_25415	62294	High-quality	temperate	Unassigned	Unassigned	Unassigned	Unassigned	Unassigned	Buffalo	Rectum
Buffalo_10895	VC_25416	142474	High-quality	uncertain_temperate	Peploviricota	Herviviricetes	Herpesvirales	Herpesviridae	Muromegalovirus	Buffalo	Rectum
Buffalo_10896	VC_25417	32674	Medium-quality	uncertain_temperate	Uroviricota	Caudoviricetes	Caudovirales	Siphoviridae	Casadabanvirus	Buffalo	Rectum
Buffalo_10897	VC_7567	31229	Medium-quality	uncertain_virulent	Unassigned	Unassigned	Unassigned	Unassigned	Unassigned	Buffalo	Rectum
Buffalo_10898	VC_25418	45363	Medium-quality	uncertain_virulent	Pisuviricota	Stelpaviricetes	Patatavirales	Potyviridae	Macluravirus	Buffalo	Rectum
Buffalo_10899	VC_25419	42930	Medium-quality	uncertain_temperate	Unassigned	Naldaviricetes	Lefavirales	Baculoviridae	Alphabaculovirus	Buffalo	Rectum
Buffalo_109	VC_18472	34994	Medium-quality	virulent	Uroviricota	Caudoviricetes	Caudovirales	Siphoviridae	Unassigned	Buffalo	Rectum
Buffalo_10900	VC_7568	33869	Medium-quality	uncertain_temperate	Nucleocytoviricota	Megaviricetes	Imitervirales	Mimiviridae	Mimivirus	Buffalo	Rectum
Buffalo_10902	VC_7569	88559	Medium-quality	uncertain_virulent	Nucleocytoviricota	Megaviricetes	Imitervirales	Mimiviridae	Mimivirus	Buffalo	Rectum
Buffalo_10903	VC_25420	6965	High-quality	uncertain_virulent	Unassigned	Unassigned	Unassigned	Unassigned	Unassigned	Buffalo	Rectum
Buffalo_10904	VC_7562	5912	Complete	temperate	Pisuviricota	Pisoniviricetes	Nidovirales	Coronaviridae	Alphacoronavirus	Buffalo	Rectum
Buffalo_10905	VC_4086	38551	Medium-quality	uncertain_temperate	Uroviricota	Caudoviricetes	Caudovirales	Siphoviridae	Unassigned	Buffalo	Rectum
Buffalo_10906	VC_7570	6718	Medium-quality	uncertain_virulent	Phixviricota	Malgrandaviricetes	Petitvirales	Microviridae	Unassigned	Buffalo	Rectum
Buffalo_10907	VC_7553	6284	Complete	virulent	Unassigned	Unassigned	Unassigned	Unassigned	Unassigned	Buffalo	Rectum
Buffalo_10908	VC_7571	198256	High-quality	uncertain_virulent	Nucleocytoviricota	Pokkesviricetes	Chitovirales	Poxviridae	Betaentomopoxvirus	Buffalo	Rectum
Buffalo_10909	VC_25421	728883	Medium-quality	uncertain_temperate	Nucleocytoviricota	Megaviricetes	Imitervirales	Mimiviridae	Mimivirus	Buffalo	Rectum
Buffalo_1091	VC_4087	31893	Medium-quality	uncertain_virulent	Uroviricota	Caudoviricetes	Caudovirales	Myoviridae	Barbavirus	Buffalo	Colon
Buffalo_10911	VC_7566	247936	Complete	uncertain_virulent	Nucleocytoviricota	Megaviricetes	Imitervirales	Mimiviridae	Mimivirus	Buffalo	Rectum
Buffalo_10912	VC_25423	98583	Medium-quality	uncertain_temperate	Nucleocytoviricota	Megaviricetes	Imitervirales	Mimiviridae	Mimivirus	Buffalo	Rectum
Buffalo_10913	VC_1692	51978	Medium-quality	uncertain_virulent	Nucleocytoviricota	Pokkesviricetes	Chitovirales	Poxviridae	Betaentomopoxvirus	Buffalo	Rectum
Buffalo_10914	VC_25424	60607	Medium-quality	uncertain_temperate	Uroviricota	Caudoviricetes	Caudovirales	Siphoviridae	Unassigned	Buffalo	Rectum
Buffalo_10915	VC_25425	34410	Medium-quality	temperate	Uroviricota	Caudoviricetes	Caudovirales	Siphoviridae	Unassigned	Buffalo	Rectum
Buffalo_10916	VC_25426	57338	High-quality	uncertain_virulent	Unassigned	Naldaviricetes	Lefavirales	Baculoviridae	Alphabaculovirus	Buffalo	Rectum
Buffalo_10917	VC_7569	88696	Medium-quality	uncertain_virulent	Unassigned	Naldaviricetes	Lefavirales	Baculoviridae	Alphabaculovirus	Buffalo	Rectum
Buffalo_1092	VC_18979	29355	Medium-quality	uncertain_temperate	Unassigned	Unassigned	Unassigned	Unassigned	Unassigned	Buffalo	Colon
Buffalo_10920	VC_25427	54194	Medium-quality	uncertain_virulent	Unassigned	Unassigned	Unassigned	Unassigned	Unassigned	Buffalo	Rectum
Buffalo_10921	VC_25428	71320	Complete	uncertain_virulent	Negarnaviricota	Monjiviricetes	Mononegavirales	Rhabdoviridae	Ledantevirus	Buffalo	Rectum
Buffalo_10922	VC_25429	43895	Medium-quality	uncertain_temperate	Unassigned	Unassigned	Unassigned	Unassigned	Unassigned	Buffalo	Rectum
Buffalo_10923	VC_7571	198388	Complete	uncertain_virulent	Nucleocytoviricota	Pokkesviricetes	Chitovirales	Poxviridae	Betaentomopoxvirus	Buffalo	Rectum
Buffalo_10924	VC_4085	209683	High-quality	uncertain_virulent	Nucleocytoviricota	Megaviricetes	Imitervirales	Mimiviridae	Mimivirus	Buffalo	Rectum
Buffalo_10925	VC_1694	31291	Medium-quality	uncertain_temperate	Uroviricota	Caudoviricetes	Caudovirales	Siphoviridae	Unassigned	Buffalo	Rectum
Buffalo_10927	VC_25430	5270	High-quality	uncertain_virulent	Unassigned	Unassigned	Unassigned	Unassigned	Unassigned	Buffalo	Rectum
Buffalo_10929	VC_25431	5212	Medium-quality	uncertain_virulent	Cressdnaviricota	Repensiviricetes	Geplafuvirales	Geminiviridae	Begomovirus	Buffalo	Rectum
Buffalo_1093	VC_18980	63151	Medium-quality	uncertain_virulent	Unassigned	Unassigned	Unassigned	Unassigned	Unassigned	Buffalo	Colon
Buffalo_10931	VC_1688	51243	Medium-quality	uncertain_virulent	Uroviricota	Caudoviricetes	Caudovirales	Siphoviridae	Unassigned	Buffalo	Rectum
Buffalo_10932	VC_7567	38490	Medium-quality	uncertain_virulent	Nucleocytoviricota	Megaviricetes	Algavirales	Phycodnaviridae	Chlorovirus	Buffalo	Rectum
Buffalo_10933	VC_25432	33300	Medium-quality	uncertain_virulent	Cressdnaviricota	Arfiviricetes	Baphyvirales	Bacilladnaviridae	Protobacilladnavirus	Buffalo	Rectum
Buffalo_10934	VC_7568	33869	Medium-quality	temperate	Nucleocytoviricota	Megaviricetes	Imitervirales	Mimiviridae	Mimivirus	Buffalo	Rectum
Buffalo_10935	VC_7570	6718	Medium-quality	uncertain_virulent	Phixviricota	Malgrandaviricetes	Petitvirales	Microviridae	Unassigned	Buffalo	Rectum
Buffalo_10936	VC_25433	32113	Medium-quality	uncertain_virulent	Uroviricota	Caudoviricetes	Caudovirales	Siphoviridae	Unassigned	Buffalo	Rectum
Buffalo_10937	VC_10302	70391	Medium-quality	uncertain_temperate	Uroviricota	Caudoviricetes	Caudovirales	Myoviridae	Tequatrovirus	Buffalo	Rectum
Buffalo_10938	VC_25434	350407	Complete	uncertain_virulent	Nucleocytoviricota	Pokkesviricetes	Chitovirales	Poxviridae	Betaentomopoxvirus	Buffalo	Rectum
Buffalo_10939	VC_25435	42357	Medium-quality	uncertain_temperate	Uroviricota	Caudoviricetes	Caudovirales	Myoviridae	Tequatrovirus	Buffalo	Rectum
Buffalo_1094	VC_1695	42346	Medium-quality	uncertain_virulent	Unassigned	Unassigned	Unassigned	Unassigned	Unassigned	Buffalo	Colon
Buffalo_10941	VC_25436	37206	Medium-quality	uncertain_temperate	Unassigned	Unassigned	Unassigned	Unassigned	Unassigned	Buffalo	Rectum
Buffalo_10942	VC_25437	58266	Medium-quality	uncertain_virulent	Uroviricota	Caudoviricetes	Caudovirales	Siphoviridae	Unassigned	Buffalo	Rectum
Buffalo_10943	VC_7573	34792	Medium-quality	uncertain_virulent	Unassigned	Naldaviricetes	Lefavirales	Baculoviridae	Alphabaculovirus	Buffalo	Rectum
Buffalo_10944	VC_25438	45494	Medium-quality	uncertain_temperate	Unassigned	Unassigned	Unassigned	Unassigned	Unassigned	Buffalo	Rectum
Buffalo_10945	VC_25439	51139	Medium-quality	uncertain_temperate	Uroviricota	Caudoviricetes	Caudovirales	Siphoviridae	Unassigned	Buffalo	Rectum
Buffalo_10946	VC_25440	67281	Medium-quality	uncertain_virulent	Unassigned	Unassigned	Unassigned	Unassigned	Unassigned	Buffalo	Rectum
Buffalo_10947	VC_25441	100083	High-quality	uncertain_temperate	Unassigned	Unassigned	Unassigned	Unassigned	Unassigned	Buffalo	Rectum
Buffalo_10948	VC_25442	29989	Medium-quality	temperate	Nucleocytoviricota	Pokkesviricetes	Chitovirales	Poxviridae	Betaentomopoxvirus	Buffalo	Rectum
Buffalo_10949	VC_25443	6009	High-quality	uncertain_temperate	Unassigned	Unassigned	Unassigned	Unassigned	Unassigned	Buffalo	Rectum
Buffalo_1095	VC_18981	218792	High-quality	virulent	Nucleocytoviricota	Pokkesviricetes	Chitovirales	Poxviridae	Betaentomopoxvirus	Buffalo	Colon
Buffalo_10950	VC_25444	59688	Complete	uncertain_temperate	Unassigned	Unassigned	Unassigned	Unassigned	Unassigned	Buffalo	Rectum
Buffalo_10951	VC_25445	120609	Medium-quality	uncertain_temperate	Unassigned	Naldaviricetes	Lefavirales	Baculoviridae	Alphabaculovirus	Buffalo	Rectum
Buffalo_10952	VC_7574	76175	Medium-quality	virulent	Uroviricota	Caudoviricetes	Caudovirales	Myoviridae	Unassigned	Buffalo	Rectum
Buffalo_10953	VC_25446	33922	High-quality	uncertain_virulent	Unassigned	Unassigned	Unassigned	Unassigned	Unassigned	Buffalo	Rectum
Buffalo_10954	VC_25447	50301	Medium-quality	uncertain_temperate	Unassigned	Naldaviricetes	Lefavirales	Baculoviridae	Alphabaculovirus	Buffalo	Rectum
Buffalo_10955	VC_25448	6149	Medium-quality	virulent	Phixviricota	Malgrandaviricetes	Petitvirales	Microviridae	Unassigned	Buffalo	Rectum
Buffalo_10956	VC_25449	79476	Medium-quality	uncertain_temperate	Unassigned	Naldaviricetes	Lefavirales	Baculoviridae	Alphabaculovirus	Buffalo	Rectum
Buffalo_10957	VC_25450	53568	Medium-quality	virulent	Uroviricota	Caudoviricetes	Caudovirales	Schitoviridae	Ithacavirus	Buffalo	Rectum
Buffalo_10959	VC_25451	29294	Medium-quality	uncertain_virulent	Unassigned	Unassigned	Unassigned	Unassigned	Unassigned	Buffalo	Rectum
Buffalo_1096	VC_18982	111387	Medium-quality	uncertain_temperate	Nucleocytoviricota	Pokkesviricetes	Chitovirales	Poxviridae	Betaentomopoxvirus	Buffalo	Colon
Buffalo_10960	VC_2477	44359	Medium-quality	uncertain_temperate	Uroviricota	Caudoviricetes	Caudovirales	Siphoviridae	Fromanvirus	Buffalo	Rectum
Buffalo_10961	VC_25452	6426	High-quality	virulent	Unassigned	Unassigned	Unassigned	Unassigned	Unassigned	Buffalo	Rectum
Buffalo_10962	VC_2478	31927	Medium-quality	uncertain_virulent	Uroviricota	Caudoviricetes	Caudovirales	Siphoviridae	Unassigned	Buffalo	Rectum
Buffalo_10963	VC_1692	51203	Medium-quality	uncertain_virulent	Uroviricota	Caudoviricetes	Caudovirales	Demerecviridae	Tequintavirus	Buffalo	Rectum
Buffalo_10964	VC_25453	31159	Medium-quality	uncertain_virulent	Uroviricota	Caudoviricetes	Caudovirales	Myoviridae	Unassigned	Buffalo	Rectum
Buffalo_10965	VC_25454	52092	Medium-quality	uncertain_virulent	Unassigned	Unassigned	Unassigned	Unassigned	Unassigned	Buffalo	Rectum
Buffalo_10967	VC_25455	121859	Complete	uncertain_temperate	Nucleocytoviricota	Megaviricetes	Imitervirales	Mimiviridae	Mimivirus	Buffalo	Rectum
Buffalo_10968	VC_7576	31590	Medium-quality	uncertain_temperate	Nucleocytoviricota	Megaviricetes	Imitervirales	Mimiviridae	Mimivirus	Buffalo	Rectum
Buffalo_10969	VC_25456	59920	Complete	uncertain_virulent	Uroviricota	Caudoviricetes	Caudovirales	Siphoviridae	Kenoshavirus	Buffalo	Rectum
Buffalo_1097	VC_18983	71552	Medium-quality	uncertain_temperate	Nucleocytoviricota	Pokkesviricetes	Chitovirales	Poxviridae	Betaentomopoxvirus	Buffalo	Colon,Reticulum
Buffalo_10970	VC_25457	38068	Medium-quality	uncertain_temperate	Uroviricota	Caudoviricetes	Caudovirales	Siphoviridae	Korravirus	Buffalo	Rectum
Buffalo_10971	VC_7577	93385	Medium-quality	virulent	Nucleocytoviricota	Pokkesviricetes	Chitovirales	Poxviridae	Betaentomopoxvirus	Buffalo	Rectum
Buffalo_10972	VC_25458	38212	Medium-quality	uncertain_virulent	Uroviricota	Caudoviricetes	Caudovirales	Siphoviridae	Stanholtvirus	Buffalo	Rectum
Buffalo_10973	VC_25459	90731	Medium-quality	uncertain_virulent	Unassigned	Naldaviricetes	Lefavirales	Baculoviridae	Alphabaculovirus	Buffalo	Rectum
Buffalo_10974	VC_25460	42773	Medium-quality	uncertain_temperate	Unassigned	Unassigned	Unassigned	Unassigned	Unassigned	Buffalo	Rectum
Buffalo_10975	VC_25461	6819	Complete	virulent	Unassigned	Unassigned	Unassigned	Unassigned	Unassigned	Buffalo	Rectum
Buffalo_10976	VC_25462	5810	Complete	virulent	Phixviricota	Malgrandaviricetes	Petitvirales	Microviridae	Unassigned	Buffalo	Rectum
Buffalo_10977	VC_25463	35653	Medium-quality	uncertain_temperate	Unassigned	Unassigned	Unassigned	Unassigned	Unassigned	Buffalo	Rectum
Buffalo_10978	VC_25464	17189	Medium-quality	uncertain_temperate	Uroviricota	Caudoviricetes	Caudovirales	Podoviridae	Unassigned	Buffalo	Rectum
Buffalo_10979	VC_25465	43217	Medium-quality	virulent	Unassigned	Unassigned	Unassigned	Unassigned	Unassigned	Buffalo	Rectum
Buffalo_1098	VC_4089	353054	Complete	uncertain_virulent	Nucleocytoviricota	Pokkesviricetes	Chitovirales	Poxviridae	Betaentomopoxvirus	Buffalo	Colon,Rumen,Abomasum
Buffalo_10980	VC_4088	50882	Medium-quality	uncertain_temperate	Unassigned	Unassigned	Unassigned	Unassigned	Unassigned	Buffalo	Rectum
Buffalo_10981	VC_25466	55499	Medium-quality	temperate	Uroviricota	Caudoviricetes	Caudovirales	Podoviridae	Lessievirus	Buffalo	Rectum
Buffalo_10982	VC_25467	48318	Medium-quality	uncertain_virulent	Uroviricota	Caudoviricetes	Caudovirales	Siphoviridae	Cheoctovirus	Buffalo	Rectum
Buffalo_10983	VC_25468	40025	Medium-quality	uncertain_virulent	Uroviricota	Caudoviricetes	Caudovirales	Siphoviridae	Unassigned	Buffalo	Rectum
Buffalo_10984	VC_25469	36665	Medium-quality	uncertain_temperate	Unassigned	Naldaviricetes	Lefavirales	Baculoviridae	Betabaculovirus	Buffalo	Rectum
Buffalo_10985	VC_25470	5852	Medium-quality	temperate	Phixviricota	Malgrandaviricetes	Petitvirales	Microviridae	Unassigned	Buffalo	Rectum
Buffalo_10986	VC_7573	47684	Medium-quality	uncertain_virulent	Unassigned	Naldaviricetes	Lefavirales	Baculoviridae	Alphabaculovirus	Buffalo	Rectum
Buffalo_10987	VC_25471	56032	Medium-quality	uncertain_virulent	Unassigned	Naldaviricetes	Lefavirales	Baculoviridae	Alphabaculovirus	Buffalo	Rectum
Buffalo_10988	VC_25472	90104	Medium-quality	uncertain_temperate	Nucleocytoviricota	Pokkesviricetes	Chitovirales	Poxviridae	Betaentomopoxvirus	Buffalo	Rectum
Buffalo_10989	VC_25473	24339	Medium-quality	uncertain_virulent	Uroviricota	Caudoviricetes	Caudovirales	Siphoviridae	Unassigned	Buffalo	Rectum
Buffalo_1099	VC_18984	122386	Medium-quality	uncertain_virulent	Nucleocytoviricota	Megaviricetes	Imitervirales	Mimiviridae	Mimivirus	Buffalo	Colon
Buffalo_10990	VC_25474	5635	Medium-quality	virulent	Unassigned	Unassigned	Unassigned	Unassigned	Unassigned	Buffalo	Rectum
Buffalo_10991	VC_7578	4989	Medium-quality	uncertain_virulent	Peploviricota	Herviviricetes	Herpesvirales	Alloherpesviridae	Batrachovirus	Buffalo	Rectum
Buffalo_10992	VC_25475	56576	Complete	uncertain_temperate	Unassigned	Naldaviricetes	Lefavirales	Baculoviridae	Alphabaculovirus	Buffalo	Rectum
Buffalo_10993	VC_2479	17496	Medium-quality	uncertain_virulent	Uroviricota	Caudoviricetes	Caudovirales	Podoviridae	Unassigned	Buffalo	Rectum
Buffalo_10994	VC_25476	17619	Medium-quality	virulent	Unassigned	Unassigned	Unassigned	Unassigned	Unassigned	Buffalo	Rectum
Buffalo_10996	VC_25477	60602	High-quality	uncertain_temperate	Nucleocytoviricota	Pokkesviricetes	Chitovirales	Poxviridae	Betaentomopoxvirus	Buffalo	Rectum
Buffalo_10997	VC_25478	35812	Medium-quality	uncertain_temperate	Nucleocytoviricota	Megaviricetes	Imitervirales	Mimiviridae	Mimivirus	Buffalo	Rectum
Buffalo_10998	VC_1696	36177	Medium-quality	virulent	Unassigned	Unassigned	Unassigned	Unassigned	Unassigned	Buffalo	Rectum
Buffalo_10999	VC_25479	72683	Medium-quality	uncertain_temperate	Nucleocytoviricota	Pokkesviricetes	Chitovirales	Poxviridae	Betaentomopoxvirus	Buffalo	Rectum
Buffalo_110	VC_18473	45333	Medium-quality	uncertain_virulent	Unassigned	Unassigned	Unassigned	Unassigned	Unassigned	Buffalo	Rectum
Buffalo_1100	VC_18985	27240	Medium-quality	uncertain_temperate	Unassigned	Unassigned	Unassigned	Unassigned	Unassigned	Buffalo	Colon
Buffalo_11000	VC_25480	63051	Medium-quality	uncertain_temperate	Peploviricota	Herviviricetes	Herpesvirales	Herpesviridae	Varicellovirus	Buffalo	Rectum
Buffalo_11001	VC_25481	44652	Medium-quality	uncertain_virulent	Uroviricota	Caudoviricetes	Caudovirales	Siphoviridae	Unassigned	Buffalo	Rectum
Buffalo_11003	VC_25482	5056	Medium-quality	virulent	Phixviricota	Malgrandaviricetes	Petitvirales	Microviridae	Unassigned	Buffalo	Rectum
Buffalo_11004	VC_7549	252282	Medium-quality	uncertain_virulent	Nucleocytoviricota	Pokkesviricetes	Chitovirales	Poxviridae	Betaentomopoxvirus	Buffalo	Rectum
Buffalo_11005	VC_25483	45949	Medium-quality	uncertain_virulent	Uroviricota	Caudoviricetes	Caudovirales	Siphoviridae	Unassigned	Buffalo	Rectum
Buffalo_11006	VC_7581	41324	Medium-quality	uncertain_temperate	Negarnaviricota	Ellioviricetes	Bunyavirales	Peribunyaviridae	Orthobunyavirus	Buffalo	Rectum
Buffalo_11007	VC_25484	43869	Medium-quality	uncertain_temperate	Uroviricota	Caudoviricetes	Caudovirales	Siphoviridae	Fromanvirus	Buffalo	Rectum
Buffalo_11008	VC_4086	28207	Medium-quality	uncertain_temperate	Unassigned	Naldaviricetes	Lefavirales	Nudiviridae	Alphanudivirus	Buffalo	Rectum
Buffalo_11009	VC_25485	28958	Medium-quality	uncertain_temperate	Uroviricota	Caudoviricetes	Caudovirales	Siphoviridae	Unassigned	Buffalo	Rectum
Buffalo_1101	VC_18986	32596	Medium-quality	uncertain_temperate	Unassigned	Unassigned	Unassigned	Unassigned	Unassigned	Buffalo	Colon
Buffalo_11010	VC_25486	6313	Complete	uncertain_virulent	Uroviricota	Caudoviricetes	Caudovirales	Myoviridae	Tequatrovirus	Buffalo	Rectum
Buffalo_11011	VC_25487	121222	Medium-quality	uncertain_virulent	Uroviricota	Caudoviricetes	Caudovirales	Demerecviridae	Cetovirus	Buffalo	Rectum
Buffalo_11012	VC_25488	161474	Medium-quality	uncertain_virulent	Nucleocytoviricota	Pokkesviricetes	Chitovirales	Poxviridae	Betaentomopoxvirus	Buffalo	Rectum
Buffalo_11013	VC_25489	41693	Medium-quality	uncertain_virulent	Unassigned	Unassigned	Unassigned	Unassigned	Unassigned	Buffalo	Rectum
Buffalo_11014	VC_25490	309369	High-quality	uncertain_temperate	Nucleocytoviricota	Megaviricetes	Imitervirales	Mimiviridae	Mimivirus	Buffalo	Rectum
Buffalo_11015	VC_25491	93799	Medium-quality	uncertain_temperate	Nucleocytoviricota	Megaviricetes	Imitervirales	Mimiviridae	Mimivirus	Buffalo	Rectum
Buffalo_11017	VC_921	31145	Medium-quality	virulent	Uroviricota	Caudoviricetes	Caudovirales	Siphoviridae	Unassigned	Buffalo	Rectum
Buffalo_11018	VC_25492	390286	High-quality	uncertain_virulent	Unassigned	Naldaviricetes	Lefavirales	Baculoviridae	Alphabaculovirus	Buffalo	Rectum
Buffalo_11019	VC_25493	349302	High-quality	virulent	Unassigned	Naldaviricetes	Lefavirales	Baculoviridae	Alphabaculovirus	Buffalo	Rectum
Buffalo_1102	VC_18987	34854	Medium-quality	uncertain_virulent	Uroviricota	Caudoviricetes	Caudovirales	Siphoviridae	Unassigned	Buffalo	Colon
Buffalo_11020	VC_25494	176887	Medium-quality	uncertain_virulent	Unassigned	Naldaviricetes	Lefavirales	Baculoviridae	Alphabaculovirus	Buffalo	Rectum
Buffalo_11021	VC_25495	94654	High-quality	uncertain_temperate	Uroviricota	Caudoviricetes	Caudovirales	Siphoviridae	Skunavirus	Buffalo	Rectum
Buffalo_11022	VC_25496	13255	High-quality	uncertain_virulent	Unassigned	Unassigned	Unassigned	Unassigned	Unassigned	Buffalo	Rectum
Buffalo_11023	VC_1181	111202	Medium-quality	uncertain_virulent	Peploviricota	Herviviricetes	Herpesvirales	Herpesviridae	Varicellovirus	Buffalo	Rectum
Buffalo_11024	VC_25497	32088	Medium-quality	uncertain_temperate	Uroviricota	Caudoviricetes	Caudovirales	Siphoviridae	Unassigned	Buffalo	Rectum
Buffalo_11025	VC_25498	48252	Medium-quality	uncertain_virulent	Nucleocytoviricota	Pokkesviricetes	Chitovirales	Poxviridae	Betaentomopoxvirus	Buffalo	Rectum
Buffalo_11026	VC_25499	45100	Medium-quality	temperate	Uroviricota	Caudoviricetes	Caudovirales	Myoviridae	Mydovirus	Buffalo	Rectum
Buffalo_11027	VC_25500	36061	Medium-quality	uncertain_temperate	Unassigned	Unassigned	Unassigned	Unassigned	Unassigned	Buffalo	Rectum
Buffalo_11028	VC_25501	38739	Medium-quality	uncertain_temperate	Unassigned	Unassigned	Unassigned	Polydnaviriformidae	Ichnoviriform	Buffalo	Rectum
Buffalo_11029	VC_7429	6607	Complete	uncertain_virulent	Uroviricota	Caudoviricetes	Caudovirales	Myoviridae	Tequatrovirus	Buffalo	Rectum
Buffalo_1103	VC_18988	17968	Medium-quality	uncertain_virulent	Uroviricota	Caudoviricetes	Caudovirales	Podoviridae	Unassigned	Buffalo	Colon
Buffalo_11030	VC_25502	5359	Complete	uncertain_temperate	Phixviricota	Malgrandaviricetes	Petitvirales	Microviridae	Unassigned	Buffalo	Rectum
Buffalo_11031	VC_25503	5268	Medium-quality	virulent	Unassigned	Naldaviricetes	Lefavirales	Baculoviridae	Alphabaculovirus	Buffalo	Rectum
Buffalo_11032	VC_25504	4919	Complete	uncertain_virulent	Negarnaviricota	Ellioviricetes	Bunyavirales	Tospoviridae	Orthotospovirus	Buffalo	Rectum
Buffalo_11033	VC_25505	81375	Medium-quality	virulent	Uroviricota	Caudoviricetes	Caudovirales	Myoviridae	Unassigned	Buffalo	Rectum
Buffalo_11034	VC_2474	64692	Medium-quality	virulent	Unassigned	Unassigned	Unassigned	Unassigned	Unassigned	Buffalo	Rectum
Buffalo_11036	VC_25506	5562	Medium-quality	temperate	Unassigned	Unassigned	Unassigned	Unassigned	Unassigned	Buffalo	Rectum
Buffalo_11037	VC_25507	50651	Medium-quality	uncertain_virulent	Nucleocytoviricota	Megaviricetes	Imitervirales	Mimiviridae	Mimivirus	Buffalo	Rectum
Buffalo_11039	VC_7582	36601	Medium-quality	temperate	Unassigned	Unassigned	Unassigned	Unassigned	Unassigned	Buffalo	Rectum
Buffalo_1104	VC_2481	33584	Medium-quality	uncertain_temperate	Uroviricota	Caudoviricetes	Caudovirales	Myoviridae	Karamvirus	Buffalo	Colon
Buffalo_11040	VC_25508	95756	Complete	uncertain_temperate	Nucleocytoviricota	Pokkesviricetes	Chitovirales	Poxviridae	Betaentomopoxvirus	Buffalo	Rectum
Buffalo_11041	VC_4081	36895	Medium-quality	uncertain_virulent	Uroviricota	Caudoviricetes	Caudovirales	Siphoviridae	Unassigned	Buffalo	Rectum
Buffalo_11042	VC_4079	38318	Medium-quality	uncertain_virulent	Uroviricota	Caudoviricetes	Caudovirales	Siphoviridae	Unassigned	Buffalo	Rectum
Buffalo_11044	VC_25509	104070	Medium-quality	uncertain_virulent	Nucleocytoviricota	Pokkesviricetes	Chitovirales	Poxviridae	Betaentomopoxvirus	Buffalo	Rectum
Buffalo_11045	VC_4083	45392	Medium-quality	uncertain_temperate	Peploviricota	Herviviricetes	Herpesvirales	Herpesviridae	Proboscivirus	Buffalo	Rectum
Buffalo_11046	VC_7555	46929	Medium-quality	uncertain_virulent	Unassigned	Unassigned	Unassigned	Unassigned	Unassigned	Buffalo	Rectum
Buffalo_11047	VC_25510	97645	Medium-quality	virulent	Nucleocytoviricota	Megaviricetes	Imitervirales	Mimiviridae	Mimivirus	Buffalo	Rectum
Buffalo_11048	VC_7583	39676	Medium-quality	uncertain_temperate	Unassigned	Unassigned	Unassigned	Unassigned	Unassigned	Buffalo	Rectum
Buffalo_11049	VC_25511	59292	Medium-quality	uncertain_virulent	Uroviricota	Caudoviricetes	Caudovirales	Siphoviridae	Saphexavirus	Buffalo	Rectum
Buffalo_11050	VC_25512	76091	Medium-quality	uncertain_temperate	Peploviricota	Herviviricetes	Herpesvirales	Herpesviridae	Varicellovirus	Buffalo	Rectum
Buffalo_11051	VC_25513	15845	Medium-quality	uncertain_virulent	Uroviricota	Caudoviricetes	Caudovirales	Podoviridae	Unassigned	Buffalo	Rectum
Buffalo_11052	VC_25514	184084	Complete	uncertain_virulent	Nucleocytoviricota	Megaviricetes	Imitervirales	Mimiviridae	Mimivirus	Buffalo	Rectum
Buffalo_11053	VC_25515	44158	Medium-quality	uncertain_virulent	Unassigned	Unassigned	Unassigned	Unassigned	Unassigned	Buffalo	Rectum
Buffalo_11054	VC_7564	5289	Complete	uncertain_virulent	Nucleocytoviricota	Pokkesviricetes	Asfuvirales	Asfarviridae	Asfivirus	Buffalo	Rectum
Buffalo_11056	VC_2482	36550	Medium-quality	uncertain_virulent	Uroviricota	Caudoviricetes	Caudovirales	Siphoviridae	Korravirus	Buffalo	Rectum
Buffalo_11057	VC_25516	49812	Medium-quality	uncertain_virulent	Nucleocytoviricota	Megaviricetes	Algavirales	Phycodnaviridae	Chlorovirus	Buffalo	Rectum
Buffalo_11058	VC_25517	59339	Medium-quality	uncertain_temperate	Uroviricota	Caudoviricetes	Caudovirales	Siphoviridae	Unassigned	Buffalo	Rectum
Buffalo_11059	VC_25518	6275	Complete	uncertain_temperate	Uroviricota	Caudoviricetes	Caudovirales	Siphoviridae	Slashvirus	Buffalo	Rectum
Buffalo_1106	VC_4090	44119	Medium-quality	uncertain_temperate	Uroviricota	Caudoviricetes	Caudovirales	Autographiviridae	Teseptimavirus	Buffalo	Colon
Buffalo_11060	VC_25519	37022	Medium-quality	uncertain_virulent	Unassigned	Unassigned	Unassigned	Unassigned	Unassigned	Buffalo	Rectum
Buffalo_11061	VC_25520	24885	Medium-quality	uncertain_temperate	Unassigned	Unassigned	Unassigned	Unassigned	Unassigned	Buffalo	Rectum
Buffalo_11062	VC_25521	82042	Medium-quality	uncertain_temperate	Uroviricota	Caudoviricetes	Caudovirales	Demerecviridae	Cetovirus	Buffalo	Rectum
Buffalo_11063	VC_7584	42043	Medium-quality	uncertain_virulent	Unassigned	Naldaviricetes	Lefavirales	Baculoviridae	Betabaculovirus	Buffalo	Rectum
Buffalo_11064	VC_25522	95837	Medium-quality	virulent	Unassigned	Naldaviricetes	Lefavirales	Baculoviridae	Alphabaculovirus	Buffalo	Rectum
Buffalo_11066	VC_25523	33126	Medium-quality	temperate	Uroviricota	Caudoviricetes	Caudovirales	Siphoviridae	Lambdavirus	Buffalo	Rectum
Buffalo_11067	VC_25524	6623	High-quality	uncertain_virulent	Phixviricota	Malgrandaviricetes	Petitvirales	Microviridae	Unassigned	Buffalo	Rectum
Buffalo_11068	VC_25525	44456	Medium-quality	uncertain_virulent	Uroviricota	Caudoviricetes	Caudovirales	Siphoviridae	Nevevirus	Buffalo	Rectum
Buffalo_11069	VC_7585	124876	Medium-quality	uncertain_virulent	Uroviricota	Caudoviricetes	Caudovirales	Myoviridae	Krischvirus	Buffalo	Rectum
Buffalo_11070	VC_25526	7847	High-quality	uncertain_temperate	Unassigned	Unassigned	Unassigned	Unassigned	Unassigned	Buffalo	Rectum
Buffalo_11071	VC_25527	34524	Medium-quality	temperate	Uroviricota	Caudoviricetes	Caudovirales	Siphoviridae	Unassigned	Buffalo	Rectum
Buffalo_11072	VC_4080	85548	Medium-quality	virulent	Peploviricota	Herviviricetes	Herpesvirales	Herpesviridae	Macavirus	Buffalo	Rectum
Buffalo_11073	VC_1691	30215	Medium-quality	uncertain_virulent	Uroviricota	Caudoviricetes	Caudovirales	Siphoviridae	Unassigned	Buffalo	Rectum
Buffalo_11074	VC_25528	4988	Complete	uncertain_virulent	Phixviricota	Malgrandaviricetes	Petitvirales	Microviridae	Unassigned	Buffalo	Rectum
Buffalo_11075	VC_25529	85130	Medium-quality	virulent	Unassigned	Naldaviricetes	Lefavirales	Baculoviridae	Betabaculovirus	Buffalo	Rectum
Buffalo_11076	VC_7556	6454	Complete	virulent	Nucleocytoviricota	Megaviricetes	Imitervirales	Mimiviridae	Mimivirus	Buffalo	Rectum
Buffalo_11077	VC_7554	6011	Medium-quality	virulent	Cressdnaviricota	Arfiviricetes	Cremevirales	Smacoviridae	Porprismacovirus	Buffalo	Rectum
Buffalo_11078	VC_4084	6261	Complete	uncertain_temperate	Uroviricota	Caudoviricetes	Caudovirales	Herelleviridae	Caeruleovirus	Buffalo	Rectum
Buffalo_11079	VC_25530	6164	Complete	uncertain_temperate	Unassigned	Unassigned	Unassigned	Unassigned	Unassigned	Buffalo	Rectum
Buffalo_1108	VC_18989	13862	Medium-quality	uncertain_temperate	Unassigned	Unassigned	Unassigned	Unassigned	Unassigned	Buffalo	Colon
Buffalo_11080	VC_25531	132359	Medium-quality	uncertain_virulent	Unassigned	Naldaviricetes	Lefavirales	Baculoviridae	Alphabaculovirus	Buffalo	Rectum
Buffalo_11081	VC_25532	92445	Medium-quality	uncertain_temperate	Unassigned	Naldaviricetes	Lefavirales	Baculoviridae	Alphabaculovirus	Buffalo	Rectum
Buffalo_11083	VC_577	66804	Medium-quality	uncertain_temperate	Unassigned	Unassigned	Unassigned	Unassigned	Unassigned	Buffalo	Rectum
Buffalo_11084	VC_25533	125416	Medium-quality	uncertain_temperate	Nucleocytoviricota	Megaviricetes	Imitervirales	Mimiviridae	Mimivirus	Buffalo	Rectum
Buffalo_11085	VC_25534	210660	Medium-quality	virulent	Nucleocytoviricota	Megaviricetes	Imitervirales	Mimiviridae	Mimivirus	Buffalo	Rectum
Buffalo_11086	VC_7586	67993	Complete	uncertain_virulent	Unassigned	Unassigned	Unassigned	Unassigned	Unassigned	Buffalo	Rectum
Buffalo_11087	VC_1698	71773	Medium-quality	uncertain_virulent	Unassigned	Unassigned	Unassigned	Unassigned	Unassigned	Buffalo	Rectum
Buffalo_11089	VC_7587	48687	Medium-quality	uncertain_virulent	Nucleocytoviricota	Pokkesviricetes	Chitovirales	Poxviridae	Betaentomopoxvirus	Buffalo	Rectum
Buffalo_1109	VC_18990	65780	Medium-quality	uncertain_temperate	Unassigned	Unassigned	Unassigned	Unassigned	Unassigned	Buffalo	Colon
Buffalo_11090	VC_1699	31767	Medium-quality	uncertain_virulent	Uroviricota	Caudoviricetes	Caudovirales	Siphoviridae	Unassigned	Buffalo	Rectum
Buffalo_11091	VC_25535	58812	Medium-quality	uncertain_virulent	Nucleocytoviricota	Pokkesviricetes	Chitovirales	Poxviridae	Betaentomopoxvirus	Buffalo	Rectum
Buffalo_11092	VC_25536	50657	Medium-quality	uncertain_temperate	Nucleocytoviricota	Megaviricetes	Imitervirales	Mimiviridae	Mimivirus	Buffalo	Rectum
Buffalo_11093	VC_25537	136183	Medium-quality	uncertain_temperate	Nucleocytoviricota	Pokkesviricetes	Chitovirales	Poxviridae	Betaentomopoxvirus	Buffalo	Rectum
Buffalo_11094	VC_25538	222138	Medium-quality	uncertain_temperate	Nucleocytoviricota	Pokkesviricetes	Chitovirales	Poxviridae	Betaentomopoxvirus	Buffalo	Rectum
Buffalo_11096	VC_25539	59096	Medium-quality	uncertain_temperate	Negarnaviricota	Ellioviricetes	Bunyavirales	Tospoviridae	Orthotospovirus	Buffalo	Rectum
Buffalo_11097	VC_25540	158756	Medium-quality	virulent	Nucleocytoviricota	Megaviricetes	Imitervirales	Mimiviridae	Mimivirus	Buffalo	Rectum
Buffalo_11098	VC_7588	99772	Medium-quality	uncertain_virulent	Nucleocytoviricota	Megaviricetes	Imitervirales	Mimiviridae	Mimivirus	Buffalo	Rectum
Buffalo_11099	VC_25541	94526	Medium-quality	uncertain_virulent	Unassigned	Unassigned	Unassigned	Unassigned	Unassigned	Buffalo	Rectum
Buffalo_111	VC_4105	27521	Medium-quality	uncertain_temperate	Unassigned	Unassigned	Unassigned	Unassigned	Unassigned	Buffalo	Rectum
Buffalo_1110	VC_18991	205626	Medium-quality	uncertain_virulent	Nucleocytoviricota	Megaviricetes	Imitervirales	Mimiviridae	Mimivirus	Buffalo	Colon
Buffalo_11100	VC_25542	151929	Complete	uncertain_temperate	Nucleocytoviricota	Megaviricetes	Imitervirales	Mimiviridae	Mimivirus	Buffalo	Rectum
Buffalo_11101	VC_2486	152703	Complete	uncertain_virulent	Nucleocytoviricota	Pokkesviricetes	Chitovirales	Poxviridae	Betaentomopoxvirus	Buffalo	Rectum
Buffalo_11102	VC_4092	39851	Medium-quality	uncertain_virulent	Peploviricota	Herviviricetes	Herpesvirales	Herpesviridae	Simplexvirus	Buffalo	Rectum
Buffalo_11105	VC_475	11147	Medium-quality	uncertain_virulent	Kitrinoviricota	Alsuviricetes	Martellivirales	Closteroviridae	Velarivirus	Buffalo	Rectum
Buffalo_11106	VC_25543	15649	Medium-quality	uncertain_virulent	Uroviricota	Caudoviricetes	Caudovirales	Salasmaviridae	Salasvirus	Buffalo	Rectum
Buffalo_11107	VC_2487	119627	Medium-quality	uncertain_virulent	Nucleocytoviricota	Pokkesviricetes	Chitovirales	Poxviridae	Betaentomopoxvirus	Buffalo	Rectum
Buffalo_11108	VC_25544	101758	Medium-quality	uncertain_temperate	Uroviricota	Caudoviricetes	Caudovirales	Siphoviridae	Yuavirus	Buffalo	Rectum
Buffalo_11109	VC_7589	6203	Medium-quality	uncertain_virulent	Phixviricota	Malgrandaviricetes	Petitvirales	Microviridae	Unassigned	Buffalo	Rectum
Buffalo_11110	VC_25545	56806	Medium-quality	uncertain_temperate	Unassigned	Naldaviricetes	Lefavirales	Baculoviridae	Alphabaculovirus	Buffalo	Rectum
Buffalo_11113	VC_7590	54536	Medium-quality	uncertain_virulent	Unassigned	Naldaviricetes	Lefavirales	Baculoviridae	Betabaculovirus	Buffalo	Rectum
Buffalo_11114	VC_25546	18155	Medium-quality	uncertain_virulent	Uroviricota	Caudoviricetes	Caudovirales	Siphoviridae	Bridgettevirus	Buffalo	Rectum
Buffalo_11115	VC_25547	110705	Medium-quality	uncertain_temperate	Unassigned	Naldaviricetes	Lefavirales	Baculoviridae	Alphabaculovirus	Buffalo	Rectum
Buffalo_11116	VC_7591	31455	Medium-quality	uncertain_temperate	Uroviricota	Caudoviricetes	Caudovirales	Myoviridae	Pbunavirus	Buffalo	Rectum
Buffalo_11117	VC_25548	24055	Medium-quality	uncertain_temperate	Unassigned	Unassigned	Unassigned	Unassigned	Unassigned	Buffalo	Rectum
Buffalo_11118	VC_25549	18745	Medium-quality	uncertain_virulent	Uroviricota	Caudoviricetes	Caudovirales	Podoviridae	Unassigned	Buffalo	Rectum
Buffalo_11119	VC_7592	51095	Medium-quality	uncertain_temperate	Uroviricota	Caudoviricetes	Caudovirales	Siphoviridae	Unassigned	Buffalo	Rectum
Buffalo_1112	VC_7593	33816	Medium-quality	uncertain_virulent	Uroviricota	Caudoviricetes	Caudovirales	Siphoviridae	Unassigned	Buffalo	Colon,Reticulum
Buffalo_11120	VC_2488	93022	Medium-quality	uncertain_virulent	Nucleocytoviricota	Megaviricetes	Pimascovirales	Marseilleviridae	Marseillevirus	Buffalo	Rectum
Buffalo_11124	VC_25550	36341	Medium-quality	uncertain_temperate	Unassigned	Unassigned	Unassigned	Unassigned	Unassigned	Buffalo	Rectum
Buffalo_11126	VC_25551	54542	Medium-quality	uncertain_virulent	Nucleocytoviricota	Pokkesviricetes	Chitovirales	Poxviridae	Betaentomopoxvirus	Buffalo	Rectum
Buffalo_11127	VC_104	72944	Medium-quality	virulent	Uroviricota	Caudoviricetes	Caudovirales	Myoviridae	Felixounavirus	Buffalo	Rectum
Buffalo_11128	VC_25552	10219	High-quality	uncertain_temperate	Unassigned	Unassigned	Unassigned	Unassigned	Unassigned	Buffalo	Rectum
Buffalo_11129	VC_25553	60282	Medium-quality	uncertain_temperate	Uroviricota	Caudoviricetes	Caudovirales	Siphoviridae	Nevevirus	Buffalo	Rectum
Buffalo_1113	VC_18992	42053	Medium-quality	uncertain_temperate	Unassigned	Unassigned	Unassigned	Unassigned	Unassigned	Buffalo	Colon
Buffalo_11130	VC_4097	8093	High-quality	uncertain_temperate	Phixviricota	Malgrandaviricetes	Petitvirales	Microviridae	Unassigned	Buffalo	Rectum
Buffalo_11131	VC_25554	129044	Medium-quality	uncertain_virulent	Uroviricota	Caudoviricetes	Caudovirales	Siphoviridae	Halcyonevirus	Buffalo	Rectum
Buffalo_11132	VC_1183	50727	Medium-quality	uncertain_virulent	Nucleocytoviricota	Pokkesviricetes	Chitovirales	Poxviridae	Orthopoxvirus	Buffalo	Rectum
Buffalo_11133	VC_25555	6749	High-quality	uncertain_virulent	Unassigned	Unassigned	Unassigned	Unassigned	Unassigned	Buffalo	Rectum
Buffalo_11134	VC_25556	137211	Medium-quality	uncertain_virulent	Nucleocytoviricota	Pokkesviricetes	Chitovirales	Poxviridae	Betaentomopoxvirus	Buffalo	Rectum
Buffalo_11135	VC_7594	55279	Medium-quality	virulent	Uroviricota	Caudoviricetes	Caudovirales	Demerecviridae	Cetovirus	Buffalo	Rectum
Buffalo_11136	VC_7595	100867	Medium-quality	virulent	Uroviricota	Caudoviricetes	Caudovirales	Podoviridae	Fipvunavirus	Buffalo	Rectum
Buffalo_11137	VC_923	4947	Complete	uncertain_virulent	Uroviricota	Caudoviricetes	Caudovirales	Myoviridae	Tequatrovirus	Buffalo	Rectum
Buffalo_11138	VC_476	5398	Complete	uncertain_virulent	Uroviricota	Caudoviricetes	Caudovirales	Podoviridae	Kuravirus	Buffalo	Rectum
Buffalo_11139	VC_25557	16454	Medium-quality	uncertain_temperate	Uroviricota	Caudoviricetes	Caudovirales	Podoviridae	Unassigned	Buffalo	Rectum
Buffalo_1114	VC_18993	36569	Medium-quality	virulent	Unassigned	Unassigned	Unassigned	Unassigned	Unassigned	Buffalo	Colon
Buffalo_11140	VC_25558	53106	Medium-quality	uncertain_virulent	Nucleocytoviricota	Megaviricetes	Imitervirales	Mimiviridae	Mimivirus	Buffalo	Rectum
Buffalo_11142	VC_4098	37934	Medium-quality	uncertain_virulent	Unassigned	Unassigned	Unassigned	Unassigned	Unassigned	Buffalo	Rectum
Buffalo_11144	VC_25559	5525	Medium-quality	uncertain_virulent	Pisuviricota	Pisoniviricetes	Picornavirales	Caliciviridae	Norovirus	Buffalo	Rectum
Buffalo_11146	VC_7596	29689	Medium-quality	uncertain_virulent	Nucleocytoviricota	Pokkesviricetes	Chitovirales	Poxviridae	Betaentomopoxvirus	Buffalo	Rectum
Buffalo_11148	VC_240	67273	Medium-quality	uncertain_virulent	Nucleocytoviricota	Pokkesviricetes	Chitovirales	Poxviridae	Betaentomopoxvirus	Buffalo	Rectum
Buffalo_11149	VC_576	30314	Medium-quality	uncertain_virulent	Peploviricota	Herviviricetes	Herpesvirales	Alloherpesviridae	Cyprinivirus	Buffalo	Rectum
Buffalo_1115	VC_18994	42234	Medium-quality	uncertain_temperate	Unassigned	Unassigned	Unassigned	Unassigned	Unassigned	Buffalo	Colon
Buffalo_11150	VC_577	54778	Complete	uncertain_temperate	Unassigned	Unassigned	Unassigned	Unassigned	Unassigned	Buffalo	Rectum
Buffalo_11152	VC_25561	17707	Medium-quality	uncertain_virulent	Uroviricota	Caudoviricetes	Caudovirales	Siphoviridae	Fromanvirus	Buffalo	Rectum
Buffalo_11153	VC_25562	46200	Medium-quality	uncertain_temperate	Unassigned	Unassigned	Unassigned	Unassigned	Unassigned	Buffalo	Rectum
Buffalo_11154	VC_25563	29462	Medium-quality	uncertain_temperate	Nucleocytoviricota	Pokkesviricetes	Chitovirales	Poxviridae	Betaentomopoxvirus	Buffalo	Rectum
Buffalo_11155	VC_25564	386129	High-quality	uncertain_temperate	Nucleocytoviricota	Megaviricetes	Imitervirales	Mimiviridae	Mimivirus	Buffalo	Rectum
Buffalo_11156	VC_25565	39149	Medium-quality	uncertain_virulent	Unassigned	Unassigned	Unassigned	Unassigned	Unassigned	Buffalo	Rectum
Buffalo_11158	VC_25566	132027	Medium-quality	uncertain_virulent	Nucleocytoviricota	Pokkesviricetes	Chitovirales	Poxviridae	Betaentomopoxvirus	Buffalo	Rectum
Buffalo_11159	VC_25567	98620	Medium-quality	uncertain_virulent	Nucleocytoviricota	Pokkesviricetes	Chitovirales	Poxviridae	Betaentomopoxvirus	Buffalo	Rectum
Buffalo_1116	VC_18995	40422	Medium-quality	uncertain_virulent	Unassigned	Unassigned	Unassigned	Unassigned	Unassigned	Buffalo	Colon
Buffalo_11160	VC_25568	136387	Medium-quality	virulent	Nucleocytoviricota	Megaviricetes	Imitervirales	Mimiviridae	Mimivirus	Buffalo	Rectum
Buffalo_11161	VC_4099	28221	Medium-quality	uncertain_temperate	Uroviricota	Caudoviricetes	Caudovirales	Myoviridae	Libanvirus	Buffalo	Rectum
Buffalo_11163	VC_25569	110008	Medium-quality	uncertain_virulent	Nucleocytoviricota	Megaviricetes	Imitervirales	Mimiviridae	Mimivirus	Buffalo	Rectum
Buffalo_11164	VC_25570	99440	Medium-quality	virulent	Uroviricota	Caudoviricetes	Caudovirales	Myoviridae	Tulanevirus	Buffalo	Rectum
Buffalo_11165	VC_25571	27951	Medium-quality	temperate	Uroviricota	Caudoviricetes	Caudovirales	Siphoviridae	Unassigned	Buffalo	Rectum
Buffalo_11166	VC_25572	115735	Medium-quality	temperate	Nucleocytoviricota	Pokkesviricetes	Chitovirales	Poxviridae	Betaentomopoxvirus	Buffalo	Rectum
Buffalo_11167	VC_4101	13748	Medium-quality	virulent	Unassigned	Unassigned	Unassigned	Unassigned	Unassigned	Buffalo	Rectum
Buffalo_11168	VC_25573	47326	Complete	uncertain_temperate	Unassigned	Unassigned	Unassigned	Unassigned	Unassigned	Buffalo	Rectum
Buffalo_11169	VC_25574	146680	Medium-quality	uncertain_temperate	Unassigned	Naldaviricetes	Lefavirales	Baculoviridae	Alphabaculovirus	Buffalo	Rectum
Buffalo_1117	VC_18996	46644	Medium-quality	virulent	Unassigned	Unassigned	Unassigned	Unassigned	Unassigned	Buffalo	Colon
Buffalo_11170	VC_25575	11686	High-quality	uncertain_temperate	Unassigned	Unassigned	Unassigned	Unassigned	Unassigned	Buffalo	Rectum
Buffalo_11171	VC_7598	179611	Medium-quality	uncertain_virulent	Uroviricota	Caudoviricetes	Caudovirales	Myoviridae	Unassigned	Buffalo	Rectum
Buffalo_11172	VC_1702	49781	Medium-quality	virulent	Unassigned	Unassigned	Unassigned	Unassigned	Unassigned	Buffalo	Rectum
Buffalo_11173	VC_25576	262645	Complete	virulent	Uroviricota	Caudoviricetes	Caudovirales	Herelleviridae	Kayvirus	Buffalo	Rectum
Buffalo_11174	VC_7599	140848	Medium-quality	uncertain_temperate	Nucleocytoviricota	Megaviricetes	Imitervirales	Mimiviridae	Mimivirus	Buffalo	Rectum
Buffalo_11175	VC_7600	28873	Medium-quality	uncertain_temperate	Nucleocytoviricota	Pokkesviricetes	Chitovirales	Poxviridae	Avipoxvirus	Buffalo	Rectum
Buffalo_11176	VC_1692	51955	Medium-quality	uncertain_virulent	Nucleocytoviricota	Pokkesviricetes	Chitovirales	Poxviridae	Betaentomopoxvirus	Buffalo	Rectum
Buffalo_11177	VC_25577	6016	Complete	uncertain_virulent	Phixviricota	Malgrandaviricetes	Petitvirales	Microviridae	Unassigned	Buffalo	Rectum
Buffalo_11179	VC_7601	93976	Medium-quality	uncertain_temperate	Nucleocytoviricota	Megaviricetes	Imitervirales	Mimiviridae	Mimivirus	Buffalo	Rectum
Buffalo_1118	VC_18997	89486	Medium-quality	uncertain_temperate	Unassigned	Unassigned	Unassigned	Unassigned	Unassigned	Buffalo	Colon
Buffalo_11182	VC_25578	39501	Medium-quality	uncertain_virulent	Uroviricota	Caudoviricetes	Caudovirales	Demerecviridae	Epseptimavirus	Buffalo	Rectum
Buffalo_11184	VC_25579	58588	Medium-quality	uncertain_temperate	Uroviricota	Caudoviricetes	Caudovirales	Herelleviridae	Tsarbombavirus	Buffalo	Rectum
Buffalo_11186	VC_7602	41428	Medium-quality	uncertain_virulent	Uroviricota	Caudoviricetes	Caudovirales	Myoviridae	Tegunavirus	Buffalo	Rectum
Buffalo_11190	VC_17126	40629	Medium-quality	uncertain_temperate	Nucleocytoviricota	Pokkesviricetes	Chitovirales	Poxviridae	Orthopoxvirus	Buffalo	Rectum
Buffalo_11191	VC_7604	160750	Medium-quality	uncertain_virulent	Nucleocytoviricota	Pokkesviricetes	Chitovirales	Poxviridae	Betaentomopoxvirus	Buffalo	Rectum
Buffalo_11192	VC_577	54771	Complete	uncertain_temperate	Unassigned	Unassigned	Unassigned	Unassigned	Unassigned	Buffalo	Rectum
Buffalo_11193	VC_4102	62140	High-quality	uncertain_temperate	Nucleocytoviricota	Megaviricetes	Imitervirales	Mimiviridae	Mimivirus	Buffalo	Rectum
Buffalo_11194	VC_25580	49278	Medium-quality	uncertain_temperate	Unassigned	Naldaviricetes	Lefavirales	Baculoviridae	Alphabaculovirus	Buffalo	Rectum
Buffalo_11195	VC_4103	16744	Medium-quality	uncertain_virulent	Nucleocytoviricota	Megaviricetes	Algavirales	Phycodnaviridae	Chlorovirus	Buffalo	Rectum
Buffalo_11196	VC_7605	35642	Medium-quality	uncertain_temperate	Unassigned	Unassigned	Unassigned	Unassigned	Unassigned	Buffalo	Rectum
Buffalo_11198	VC_7606	48581	Medium-quality	uncertain_virulent	Unassigned	Unassigned	Unassigned	Unassigned	Unassigned	Buffalo	Rectum
Buffalo_11199	VC_25581	17775	Medium-quality	uncertain_temperate	Uroviricota	Caudoviricetes	Caudovirales	Podoviridae	Unassigned	Buffalo	Rectum
Buffalo_112	VC_7622	63635	High-quality	uncertain_virulent	Uroviricota	Caudoviricetes	Caudovirales	Siphoviridae	Acadianvirus	Buffalo	Rectum
Buffalo_1120	VC_18998	41378	Medium-quality	uncertain_temperate	Uroviricota	Caudoviricetes	Caudovirales	Siphoviridae	Timquatrovirus	Buffalo	Colon
Buffalo_11200	VC_25582	104045	Medium-quality	uncertain_virulent	Preplasmiviricota	Tectiliviricetes	Kalamavirales	Tectiviridae	Betatectivirus	Buffalo	Rectum
Buffalo_11201	VC_1689	144225	Medium-quality	uncertain_virulent	Peploviricota	Herviviricetes	Herpesvirales	Herpesviridae	Cytomegalovirus	Buffalo	Rectum
Buffalo_11202	VC_25583	38711	Medium-quality	uncertain_temperate	Uroviricota	Caudoviricetes	Caudovirales	Siphoviridae	Unassigned	Buffalo	Rectum
Buffalo_11203	VC_25584	44059	Medium-quality	uncertain_temperate	Nucleocytoviricota	Megaviricetes	Imitervirales	Mimiviridae	Mimivirus	Buffalo	Rectum
Buffalo_11204	VC_7607	43369	Medium-quality	uncertain_temperate	Unassigned	Naldaviricetes	Lefavirales	Baculoviridae	Alphabaculovirus	Buffalo	Rectum
Buffalo_11205	VC_1699	31128	Medium-quality	uncertain_temperate	Uroviricota	Caudoviricetes	Caudovirales	Siphoviridae	Fromanvirus	Buffalo	Rectum
Buffalo_11206	VC_4106	5275	Complete	uncertain_virulent	Unassigned	Naldaviricetes	Lefavirales	Baculoviridae	Alphabaculovirus	Buffalo	Rectum
Buffalo_11208	VC_25585	56542	Medium-quality	uncertain_virulent	Unassigned	Unassigned	Unassigned	Unassigned	Unassigned	Buffalo	Rectum
Buffalo_11209	VC_2489	152618	Complete	uncertain_virulent	Nucleocytoviricota	Megaviricetes	Imitervirales	Mimiviridae	Mimivirus	Buffalo	Rectum
Buffalo_11210	VC_25586	56748	Medium-quality	uncertain_temperate	Unassigned	Unassigned	Unassigned	Unassigned	Unassigned	Buffalo	Rectum
Buffalo_11211	VC_25587	37989	Medium-quality	uncertain_temperate	Uroviricota	Caudoviricetes	Caudovirales	Myoviridae	Unassigned	Buffalo	Rectum
Buffalo_11212	VC_25588	6347	Medium-quality	uncertain_virulent	Phixviricota	Malgrandaviricetes	Petitvirales	Microviridae	Unassigned	Buffalo	Rectum
Buffalo_11213	VC_25589	5152	Complete	uncertain_virulent	Phixviricota	Malgrandaviricetes	Petitvirales	Microviridae	Unassigned	Buffalo	Rectum
Buffalo_11214	VC_25590	49533	Complete	uncertain_temperate	Uroviricota	Caudoviricetes	Caudovirales	Siphoviridae	Vividuovirus	Buffalo	Rectum
Buffalo_11215	VC_7608	6493	Complete	uncertain_virulent	Unassigned	Unassigned	Unassigned	Unassigned	Unassigned	Buffalo	Rectum
Buffalo_11216	VC_7609	5427	High-quality	virulent	Cressdnaviricota	Arfiviricetes	Cirlivirales	Circoviridae	Unassigned	Buffalo	Rectum
Buffalo_11217	VC_2490	90669	Medium-quality	virulent	Nucleocytoviricota	Megaviricetes	Imitervirales	Mimiviridae	Mimivirus	Buffalo	Rectum
Buffalo_11218	VC_25591	74384	Medium-quality	uncertain_temperate	Uroviricota	Caudoviricetes	Caudovirales	Siphoviridae	Unassigned	Buffalo	Rectum
Buffalo_1122	VC_1706	30026	Medium-quality	uncertain_temperate	Uroviricota	Caudoviricetes	Caudovirales	Siphoviridae	Ilzatvirus	Buffalo	Colon
Buffalo_11220	VC_7594	54787	Medium-quality	virulent	Uroviricota	Caudoviricetes	Caudovirales	Demerecviridae	Cetovirus	Buffalo	Rectum
Buffalo_11221	VC_2491	278304	High-quality	uncertain_virulent	Uroviricota	Caudoviricetes	Caudovirales	Herelleviridae	Harbinvirus	Buffalo	Rectum
Buffalo_11223	VC_2489	152214	Medium-quality	uncertain_virulent	Nucleocytoviricota	Megaviricetes	Imitervirales	Mimiviridae	Mimivirus	Buffalo	Rectum
Buffalo_11225	VC_2492	52362	Medium-quality	uncertain_temperate	Unassigned	Unassigned	Unassigned	Unassigned	Unassigned	Buffalo	Rectum
Buffalo_11226	VC_1703	94446	High-quality	uncertain_temperate	Nucleocytoviricota	Pokkesviricetes	Chitovirales	Poxviridae	Betaentomopoxvirus	Buffalo	Rectum
Buffalo_11227	VC_2493	44691	Medium-quality	uncertain_temperate	Unassigned	Unassigned	Unassigned	Polydnaviriformidae	Bracoviriform	Buffalo	Rectum
Buffalo_11228	VC_25593	80801	High-quality	uncertain_virulent	Unassigned	Naldaviricetes	Lefavirales	Baculoviridae	Alphabaculovirus	Buffalo	Rectum
Buffalo_1123	VC_18999	15857	Medium-quality	uncertain_virulent	Unassigned	Unassigned	Unassigned	Unassigned	Unassigned	Buffalo	Colon
Buffalo_11231	VC_7610	39872	Medium-quality	uncertain_temperate	Uroviricota	Caudoviricetes	Caudovirales	Siphoviridae	Unassigned	Buffalo	Rectum
Buffalo_11232	VC_25594	289274	Complete	uncertain_virulent	Nucleocytoviricota	Pokkesviricetes	Chitovirales	Poxviridae	Betaentomopoxvirus	Buffalo	Rectum
Buffalo_11233	VC_25595	67016	Medium-quality	virulent	Uroviricota	Caudoviricetes	Caudovirales	Podoviridae	Unassigned	Buffalo	Rectum
Buffalo_11234	VC_1689	142812	Medium-quality	uncertain_virulent	Peploviricota	Herviviricetes	Herpesvirales	Herpesviridae	Cytomegalovirus	Buffalo	Rectum
Buffalo_11235	VC_25596	100031	Medium-quality	virulent	Nucleocytoviricota	Pokkesviricetes	Chitovirales	Poxviridae	Betaentomopoxvirus	Buffalo	Rectum
Buffalo_11237	VC_25597	5433	Complete	temperate	Phixviricota	Malgrandaviricetes	Petitvirales	Microviridae	Unassigned	Buffalo	Rectum
Buffalo_11238	VC_7611	98638	Medium-quality	uncertain_virulent	Nucleocytoviricota	Megaviricetes	Imitervirales	Mimiviridae	Mimivirus	Buffalo	Rectum
Buffalo_11239	VC_25598	100115	Medium-quality	uncertain_virulent	Uroviricota	Caudoviricetes	Caudovirales	Siphoviridae	Fromanvirus	Buffalo	Rectum
Buffalo_1124	VC_19000	31175	Medium-quality	uncertain_virulent	Unassigned	Unassigned	Unassigned	Unassigned	Unassigned	Buffalo	Colon
Buffalo_11240	VC_731	54399	Medium-quality	uncertain_virulent	Uroviricota	Caudoviricetes	Caudovirales	Siphoviridae	Unassigned	Buffalo	Rectum
Buffalo_11241	VC_1184	97763	Medium-quality	uncertain_virulent	Unassigned	Naldaviricetes	Lefavirales	Baculoviridae	Alphabaculovirus	Buffalo	Rectum
Buffalo_11242	VC_925	96847	Medium-quality	uncertain_virulent	Nucleocytoviricota	Pokkesviricetes	Chitovirales	Poxviridae	Betaentomopoxvirus	Buffalo	Rectum
Buffalo_11243	VC_1165	45814	Medium-quality	uncertain_virulent	Uroviricota	Caudoviricetes	Caudovirales	Siphoviridae	Unassigned	Buffalo	Rectum
Buffalo_11244	VC_4108	6051	Complete	virulent	Nucleocytoviricota	Megaviricetes	Imitervirales	Mimiviridae	Mimivirus	Buffalo	Rectum
Buffalo_11245	VC_25599	95295	Medium-quality	temperate	Uroviricota	Caudoviricetes	Caudovirales	Myoviridae	Punavirus	Buffalo	Rectum
Buffalo_11247	VC_2494	68961	Medium-quality	uncertain_temperate	Uroviricota	Caudoviricetes	Caudovirales	Myoviridae	Marthavirus	Buffalo	Rectum
Buffalo_11249	VC_7613	5630	Medium-quality	uncertain_virulent	Unassigned	Unassigned	Unassigned	Unassigned	Unassigned	Buffalo	Rectum
Buffalo_1125	VC_19001	37928	Medium-quality	uncertain_virulent	Nucleocytoviricota	Megaviricetes	Imitervirales	Mimiviridae	Mimivirus	Buffalo	Colon
Buffalo_11250	VC_25600	17865	Medium-quality	uncertain_virulent	Nucleocytoviricota	Megaviricetes	Imitervirales	Mimiviridae	Mimivirus	Buffalo	Rectum
Buffalo_11252	VC_2491	278721	Complete	uncertain_virulent	Uroviricota	Caudoviricetes	Caudovirales	Herelleviridae	Harbinvirus	Buffalo	Rectum
Buffalo_11253	VC_7615	85619	Medium-quality	virulent	Unassigned	Unassigned	Unassigned	Unassigned	Unassigned	Buffalo	Rectum
Buffalo_11254	VC_4109	39759	Medium-quality	temperate	Uroviricota	Caudoviricetes	Caudovirales	Siphoviridae	Timquatrovirus	Buffalo	Rectum
Buffalo_11255	VC_25601	81702	High-quality	uncertain_temperate	Unassigned	Unassigned	Unassigned	Unassigned	Unassigned	Buffalo	Rectum
Buffalo_11257	VC_922	36489	Medium-quality	uncertain_temperate	Uroviricota	Caudoviricetes	Caudovirales	Siphoviridae	Unassigned	Buffalo	Rectum
Buffalo_11258	VC_25602	34490	Medium-quality	uncertain_temperate	Nucleocytoviricota	Megaviricetes	Algavirales	Phycodnaviridae	Prasinovirus	Buffalo	Rectum
[truncated: 63,708 more rows]

## Sheet: Table S6
Classification level annotation of 41,738 phages of RVD
Virus	Phylum	Class	Order	Family	Genus
[truncated: 41,738 more rows]

[truncated: 2 more sheets: Table S7, Table S8]
